# Supplementary material for: Chromosome-level genome assembly of goose provides insight into the adaptation and growth of local goose breeds
Source: PubMed Central journal article supplement (PMC9896136; doi:10.1093/gigascience/giad003), 2023-02-03

# GigaScience

## Chromosome-level genome assembly of goose provides insight into the adaptation and growth of local goose breeds --Manuscript Draft--

|                                                      |                                                                                                                                                                                                                                                                                                                                                                                                                                                                                                                                                                                                                                                                                                                                                                                                                                                                                                                                                                                                                                                                                                                                                                                                                                                                                                                                                                                                                                                                                                                                                                                                                                                                                                           |                |
|------------------------------------------------------|-----------------------------------------------------------------------------------------------------------------------------------------------------------------------------------------------------------------------------------------------------------------------------------------------------------------------------------------------------------------------------------------------------------------------------------------------------------------------------------------------------------------------------------------------------------------------------------------------------------------------------------------------------------------------------------------------------------------------------------------------------------------------------------------------------------------------------------------------------------------------------------------------------------------------------------------------------------------------------------------------------------------------------------------------------------------------------------------------------------------------------------------------------------------------------------------------------------------------------------------------------------------------------------------------------------------------------------------------------------------------------------------------------------------------------------------------------------------------------------------------------------------------------------------------------------------------------------------------------------------------------------------------------------------------------------------------------------|----------------|
| <b>Manuscript Number:</b>                            | GIGA-D-22-00016R1                                                                                                                                                                                                                                                                                                                                                                                                                                                                                                                                                                                                                                                                                                                                                                                                                                                                                                                                                                                                                                                                                                                                                                                                                                                                                                                                                                                                                                                                                                                                                                                                                                                                                         |                |
| <b>Full Title:</b>                                   | Chromosome-level genome assembly of goose provides insight into the adaptation and growth of local goose breeds                                                                                                                                                                                                                                                                                                                                                                                                                                                                                                                                                                                                                                                                                                                                                                                                                                                                                                                                                                                                                                                                                                                                                                                                                                                                                                                                                                                                                                                                                                                                                                                           |                |
| <b>Article Type:</b>                                 | Research                                                                                                                                                                                                                                                                                                                                                                                                                                                                                                                                                                                                                                                                                                                                                                                                                                                                                                                                                                                                                                                                                                                                                                                                                                                                                                                                                                                                                                                                                                                                                                                                                                                                                                  |                |
| <b>Funding Information:</b>                          | Key Research and Development Program of Guangdong Province (2020B020222001)                                                                                                                                                                                                                                                                                                                                                                                                                                                                                                                                                                                                                                                                                                                                                                                                                                                                                                                                                                                                                                                                                                                                                                                                                                                                                                                                                                                                                                                                                                                                                                                                                               | Not applicable |
|                                                      | Construction of Modern Agricultural Science and Technology Innovation Alliance in Guangdong Province (2021KJ128, 2020KJ128)                                                                                                                                                                                                                                                                                                                                                                                                                                                                                                                                                                                                                                                                                                                                                                                                                                                                                                                                                                                                                                                                                                                                                                                                                                                                                                                                                                                                                                                                                                                                                                               | Not applicable |
|                                                      | National Modern Agricultural Industry Science and Technology Innovation Center in Guangzhou (2018kczx01)                                                                                                                                                                                                                                                                                                                                                                                                                                                                                                                                                                                                                                                                                                                                                                                                                                                                                                                                                                                                                                                                                                                                                                                                                                                                                                                                                                                                                                                                                                                                                                                                  | Not applicable |
|                                                      | Guangdong Provincial Promotion Project on Preservation and Utilization of Local Breed of Livestock and Poultry (4000-F18260)                                                                                                                                                                                                                                                                                                                                                                                                                                                                                                                                                                                                                                                                                                                                                                                                                                                                                                                                                                                                                                                                                                                                                                                                                                                                                                                                                                                                                                                                                                                                                                              | Not applicable |
|                                                      | Guangdong Basic and Applied Basic Research Foundation (2019A1515012006)                                                                                                                                                                                                                                                                                                                                                                                                                                                                                                                                                                                                                                                                                                                                                                                                                                                                                                                                                                                                                                                                                                                                                                                                                                                                                                                                                                                                                                                                                                                                                                                                                                   | Not applicable |
| <b>Abstract:</b>                                     | <p>Background: Anatidae contains numerous waterfowl species with great economic value, but the genetic diversity basis remains insufficiently investigated. Here, we report a chromosome-level genome assembly of Lion-head goose ( <i>Anser cygnoides</i> ), a native breed in South China, through the combination of PacBio, Bionano and Hi-C technologies. Findings: The assembly had a total genome size of 1.19 Gb, consisting of 1,859 contigs with an N50 length of 20.59 Mb, generating 40 pseudochromosomes, representing 97.27% of the assembled genome, and identifying 21,208 protein-coding genes. Comparative genomic analysis revealed that geese and ducks diverged approximately 28.42 million years ago, and geese have undergone massive gene family expansion and contraction. To identify genetic markers associated with body weight in different geese breeds including Wuzong goose, Huangzong goose, Magang goose and Lion-head goose, a genome-wide association study was performed, yielding an average of 1,520.6 Mb of raw data with detecting 44,858 SNPs. GWAS showed that six SNPs were significantly associated with body weight and 25 were potentially associated. The significantly associated SNPs were annotated as LDLRAD4 , GPR180 , OR , enriching in growth factor receptors regulation pathways. Conclusions: We present the first chromosome-level assembly of the Lion-head goose genome, which will expand the genomic resources of the Anatidae family, providing a basis for adaptation and evolution. Candidate genes significantly associated with different goose breeds may serve to understand the underlying mechanisms of weight differences.</p> |                |
| <b>Corresponding Author:</b>                         | Xinheng Zhang<br>South China Agricultural University<br>Guangzhou, Guangdong CHINA                                                                                                                                                                                                                                                                                                                                                                                                                                                                                                                                                                                                                                                                                                                                                                                                                                                                                                                                                                                                                                                                                                                                                                                                                                                                                                                                                                                                                                                                                                                                                                                                                        |                |
| <b>Corresponding Author Secondary Information:</b>   |                                                                                                                                                                                                                                                                                                                                                                                                                                                                                                                                                                                                                                                                                                                                                                                                                                                                                                                                                                                                                                                                                                                                                                                                                                                                                                                                                                                                                                                                                                                                                                                                                                                                                                           |                |
| <b>Corresponding Author's Institution:</b>           | South China Agricultural University                                                                                                                                                                                                                                                                                                                                                                                                                                                                                                                                                                                                                                                                                                                                                                                                                                                                                                                                                                                                                                                                                                                                                                                                                                                                                                                                                                                                                                                                                                                                                                                                                                                                       |                |
| <b>Corresponding Author's Secondary Institution:</b> |                                                                                                                                                                                                                                                                                                                                                                                                                                                                                                                                                                                                                                                                                                                                                                                                                                                                                                                                                                                                                                                                                                                                                                                                                                                                                                                                                                                                                                                                                                                                                                                                                                                                                                           |                |
| <b>First Author:</b>                                 | Qiqi Zhao                                                                                                                                                                                                                                                                                                                                                                                                                                                                                                                                                                                                                                                                                                                                                                                                                                                                                                                                                                                                                                                                                                                                                                                                                                                                                                                                                                                                                                                                                                                                                                                                                                                                                                 |                |
| <b>First Author Secondary Information:</b>           |                                                                                                                                                                                                                                                                                                                                                                                                                                                                                                                                                                                                                                                                                                                                                                                                                                                                                                                                                                                                                                                                                                                                                                                                                                                                                                                                                                                                                                                                                                                                                                                                                                                                                                           |                |

|                                                |                                                                                                                                                                                                                                                                                                                                                                                                                                                                                                                                                                                                                                                                                                                                                                                                                                                                                                                                                                                                                                                                                                                                                                                                                                                                                                                                                                                                                                                                                                                                                                                                                                                                                                                                                                                                                                                                                                                                                                                                                                                                                                                                                                                                                                               |
|------------------------------------------------|-----------------------------------------------------------------------------------------------------------------------------------------------------------------------------------------------------------------------------------------------------------------------------------------------------------------------------------------------------------------------------------------------------------------------------------------------------------------------------------------------------------------------------------------------------------------------------------------------------------------------------------------------------------------------------------------------------------------------------------------------------------------------------------------------------------------------------------------------------------------------------------------------------------------------------------------------------------------------------------------------------------------------------------------------------------------------------------------------------------------------------------------------------------------------------------------------------------------------------------------------------------------------------------------------------------------------------------------------------------------------------------------------------------------------------------------------------------------------------------------------------------------------------------------------------------------------------------------------------------------------------------------------------------------------------------------------------------------------------------------------------------------------------------------------------------------------------------------------------------------------------------------------------------------------------------------------------------------------------------------------------------------------------------------------------------------------------------------------------------------------------------------------------------------------------------------------------------------------------------------------|
| <b>Order of Authors:</b>                       | <p>Qiqi Zhao</p> <p>Junpeng Chen</p> <p>Zi Xie</p> <p>Jun Wang</p> <p>Keyu Feng</p> <p>Wencheng Lin</p> <p>Hongxin Li</p> <p>Zezhong Hu</p> <p>Weiguo Chen</p> <p>Feng Chen</p> <p>Muhammad Junaid</p> <p>Huanmin Zhang</p> <p>Zhenping Lin</p> <p>Qingmei Xie</p> <p>Xinheng Zhang</p>                                                                                                                                                                                                                                                                                                                                                                                                                                                                                                                                                                                                                                                                                                                                                                                                                                                                                                                                                                                                                                                                                                                                                                                                                                                                                                                                                                                                                                                                                                                                                                                                                                                                                                                                                                                                                                                                                                                                                       |
| <b>Order of Authors Secondary Information:</b> |                                                                                                                                                                                                                                                                                                                                                                                                                                                                                                                                                                                                                                                                                                                                                                                                                                                                                                                                                                                                                                                                                                                                                                                                                                                                                                                                                                                                                                                                                                                                                                                                                                                                                                                                                                                                                                                                                                                                                                                                                                                                                                                                                                                                                                               |
| <b>Response to Reviewers:</b>                  | <p>Dear editor,</p> <p>Thank you very much for your letter dated 07 Apr 2022, and the reviewer’s comments concerning our manuscript “Chromosome-level genome assembly of goose provides insight into the adaptation and growth of local goose breeds” (ID: GIGA-D-22-00016).</p> <p>These comments are of great value and very helpful for revising and improving our paper, as well as the importance guiding significant to our research. According to your opinion and request, we have made some revisions to the original manuscript. The responses to the questions are shown below, the black bold font part is the questions raised by the reviewers, and the dark blue font part is our reply.</p> <p>We have resubmitted the revised version in both PDF and MS word format, on the system for your review. The revised parts are marked in yellow in the MS word file of the revised manuscript for your review.</p> <p>Should you have any questions, please contact us without hesitate.</p> <p>Best wishes,<br/>Xinheng Zhang</p> <p>Questions and Responses:</p> <p>Reviewer #1: Annotation and assembly of the Lion-headed goose genome were performed using a combination of four technologies, including Illumina, SMRT, Bionano, and Hi-C. Based on the chromosome-level genome sequence, a genome-wide association study (GWAS) was performed on 514 geese including Wuzong goose, Huangzong goose, Magang goose, and Lion-head goose, yielding an average of 1.52 Gb raw data, identifying 44,858 SNPs The GWAS results showed that six SNPs were significantly associated with body weight and 25 were potentially associated. The authors should explore the spatial organization of chromatin and gene expression in the goose blood tissue (inter-pseudo-chromosomal interaction patterns, compartments, topologically associating domains, and promoter-enhancer interactions), to check if the goose genome shows similar basic principles to other animal genomes in terms of its inter-chromosomal interaction pattern, compartments, topologically associating domains, and promoter-enhancer interactions. Providing basic characterization of the three-dimensional organization of the goose genome, and</p> |

supports the conclusion the goose genome assembly is chromosomal-level. For the four goose population, the authors should perform selective sweep analysis (Fst, XP-CLR,  $\pi$  or Tajima's D), and combine with the GWAS results to illustrate the topic of the this article.

Response: Thank you very much for your questions and suggestions. The purpose of this article is to construct a complete genome map of the Lion-head Goose and to analyze the evolutionary relationships with other avian species, and to determine the genomic level variations in the selection of Lion-head, Magang, Huangzong and Wuzong geese. In response to your questions, we made the following replies.

1. The question of spatial organization of chromatin and gene expression in the goose blood you raise is a good point, and we have reviewed the relevant literature and are concerned that this issue has been investigated in the chromatin in goose liver tissue of Tianfu goose [1], chicken embryonic fibroblasts (CEF) and adult erythrocytes [2], suggesting the additive effects of enhancers on the transcriptional levels of target genes, and the important role of topologically associated domains (TADs) as genomic regulatory units, respectively. The aim in this article is to construct the Lion-head goose genome and perform evolutionary and population analysis. The analysis of the samples collected in this study did not perform blood whole transcriptome analysis, so we could not perform the analysis of spatial organization of chromatin and gene expression. But your comments are constructive and we will focus on your suggestions for further study in the next article.

2. The diploid cotton genome researchers used Hi-C technology to anchored and oriented 1,573 Mb of assembly to 13 pseudochromosomes [3]. The chromosome-level genome assembly of scimitar-horned oryx, generated 29 chromosomes using 10X Chromium sequencing and Hi-C technology [4]. The genome of autopolyploid sugarcane *Saccharum spontaneum* L. was assembled using a Hi-C-based physical map to obtain 32 pseudochromosomes [5]. The *Musa Balbisiana* Genome constructed a high-throughput chromosomal conformational capture (Hi-C) library with 430 Mb (87.27%) of assembly and 94.0% of genes placed on 11 chromosome groups [6]. The above examples fully demonstrate that the construction of chromosomal level genome by Hi-C is feasible and credible, and it is a widely used assembly method. Most researchers use Hi-C technology to illustrate genomic chromosome number. In this study, the Hi-C method we used to construct chromosomal level genomes is also an assisted assembly method based on Hi-C sequencing results, showing the three-dimensional structural characteristics of goose genomes.

3. For the four goose populations, we performed selective sweep analysis and combine with the GWAS results. Related description was added in L227-232, L341-365.

#### Reference:

[1] Li Y, Gao G, Lin Y, Hu S, Luo Y, Wang G, et al. Pacific Biosciences assembly with Hi-C mapping generates an improved, chromosome-level goose genome. *Gigascience* 2020;9:

[2] Fishman V, Battulin N, Nuriddinov M, Maslova A, Zlotina A, Strunov A, et al. 3D organization of chicken genome demonstrates evolutionary conservation of topologically associated domains and highlights unique architecture of erythrocytes' chromatin. *Nucleic Acids Res* 2019;47:648-65

[3] Du X, Huang G, He S, Yang Z, Sun G, Ma X, et al. Resequencing of 243 diploid cotton accessions based on an updated A genome identifies the genetic basis of key agronomic traits. *Nat Genet* 2018;50:796-802

[4] Humble E, Dobrynin P, Senn H, Chuven J, Scott A F, Mohr D W, et al. Chromosomal-level genome assembly of the scimitar-horned oryx: Insights into diversity and demography of a species extinct in the wild. *Mol Ecol Resour* 2020;20:1668-81

[5] Zhang J, Zhang X, Tang H, Zhang Q, Hua X, Ma X, et al. Publisher Correction: Allele-defined genome of the autopolyploid sugarcane *Saccharum spontaneum* L. *Nat Genet* 2018;50:1754

[6] Wang Z, Miao H, Liu J, Xu B, Yao X, Xu C, et al. *Musa balbisiana* genome reveals subgenome evolution and functional divergence. *Nat Plants* 2019;5:810-21

Line 27, "and identifying 21,208 protein-coding genes". Previous studies have shown that there are 16,150, 16288 and 17568 genes in Zhedong White goose, Sichuan white goose and Tianfu goose genome, respectively, please illustrate reason why the gene number were different the results from previous studies.

Response: Thank you for your comments. This is because of the differences of each species itself. By the previous studies, we can see that the number of genes is different among Zhedong White Goose, Sichuan White Goose and Tianfu Goose. The genome size of the Lion-head Goose in our present study is even larger than the former three, so it is normal to have a higher number of genes. During the process, we have performed TE filtering on the gene annotation.

Line 27, "...generating 40 pseudochromosomes", the assignment of 40 chromosomes to Hi-C scaffolds is very tentative and needs to be validated, the 40 pseudochromosomes do not equate to the 40 physical chromosomes. Moreover, the result is conflict with the 39 pseudochromosomes in Tianfu goose genome, how did the authors confirm the number of chromosomes?

Response: Thank you for your comments. According to the analysis results of Hi-C sequencing of spatial genome, there are indeed 40 chromosomes. Others are described in the second part of the first question: The diploid cotton genome researchers used Hi-C technology to anchored and oriented 1,573 Mb of assembly to 13 pseudochromosomes. The chromosome-level genome assembly of scimitar-horned oryx, generated 29 chromosomes using 10X Chromium sequencing and Hi-C technology. The genome of autopolyploid sugarcane *Saccharum spontaneum* L. was assembled using a Hi-C-based physical map to obtain 32 pseudochromosomes. The *Musa Balbisiana* Genome constructed a high-throughput chromosomal conformational capture (Hi-C) library with 430 Mb (87.27%) of assembly and 94.0% of genes placed on 11 chromosome groups. The above examples fully demonstrate that the construction of chromosomal level genome by Hi-C is feasible and credible, and it is a widely used assembly method. Most researchers use Hi-C technology to illustrate genomic chromosome number. In this study, the Hi-C method we used to construct chromosomal level genomes is also an assisted assembly method based on Hi-C sequencing results, showing the three-dimensional structural characteristics of goose genomes.

Line 33, "...an average of 1,520.6 Mb of raw data with detecting 44,858 SNPs". Based on whole-genome resequencing data, researchers have identified 9,279,339 SNPs in the goose genome using an average depth of 12.44× whole genome resequencing data. Referring to SNP number, it is uncertain whether the results in this study (44,858 SNPs generated from 1,5Gb data) is correct. Therefore, the authors should apply the BWA-GATK pipeline to Tianfu meat goose and Lion-head goose for GWAS analysis to determine whether the results are correct.

Response: Thank you for your comments. The sequencing data of the Lion-head goose population is from enzyme-based RAD-Seq, and the average sequencing depth is 12.44×. Due to the depth of sequencing coverage, it is normal to detect differences in the number of SNPs. In addition, the genome assembly of Tianfu goose has been completed by Chongqing Academy of Animal Husbandry, and the assembly data can be found on NCBI, but no re-sequencing data of Tianfu goose could be found on NCBI. Therefore, there is currently no way to conduct genome-wide association analysis between Tianfu meat goose and Lion-head goose. Furthermore, the Tianfu goose is a cultivated breed, while the Lion-head goose is a native breed, and a comparative analysis of the two does not seem to yield a relatively accurate result.

Line 61 to 65, It is recommended to rewrite or replace the descriptions for the goose breeds with methods sections.

Response: Thank you for your comments. We refined the phenotypic descriptions of the four goose species.

#### Methods section

Line 88, Provide a detailed description of the picture(s) for the Lion-head goose to display the "classical traits". Please supply the pictures for the four goose breed (Wuzong goose, Huangzong goose, Magang goose and Lion-head goose) to help the more clear the understanding of design.

Response: Thank you for your comments. Due to the limitation of conditions, it is difficult for us to take photos of four goose breed in the same background. Therefore, we use text to describe the characteristics of four goose species in the INTRODUCTION, and show pictures of individual Lion-head goose. The description is as follows: The Lion-head goose has a large body, a deep and wide head, and large sarcomas (five sarcomas) on the front and side of the face. The adult male goose

weighs 9-10 kg and the female goose 7.5-9 kg, grows rapidly and has rich muscles. Wuzong goose is a small goose species with a distinct band of black plumage from neck to back. The gander weighs 3-3.5kg and the female weighs 2.5-3kg, with wide and short body, flat back, and thin and short feet. Magang goose is a medium-sized goose species, with a long head, wide beak, rectangular body, a gray-black bristle-like feathers on the back of the neck, gray brown breast feathers and white belly feathers. Adult weight is 4-5 kg for males and 3-4 kg for females. Huangzong goose has a compact body, from the top of the head to the back of the neck has a brownish yellow feather belt, shaped like a horse's mane. The chest feather is gray yellow, the belly feather is white, the beak and sarcoma are black. Adult males weigh 3-3.5 kg, females 2.5-3 kg. Displayed in L64-74.

Line 91 to 92, "from another four healthy adult accessions were collected for RNA-seq analysis", please rewrite the sentence since it is unclear.

Response: Thank you for your comments. We have modified it as "another four healthy adult individuals".

Supply the detail information for GWAS analysis, including the software, models What parameters were used to run GATK, plink, BWA? did the authors performed GWAS analysis using plink software, rather than GEMMA, TASSEL or other software ?

Response: Thank you for your suggestions. We have supplemented the relevant software parameters and correlation analysis model, showing in L212-232.

line 200 "the results of the assoc and linear analyses were...", supply the detail of GWAS analysis, including the software, analysis model. please provide more detailed information about the models and assumptions.

Response: Thank you for your suggestions. We have supplemented the relevant data.

What the top 20 PCs? Did the PCs paly an important role in GWAS analysis?

Response: Thank you for your comments. The top 20 PCs are the top 20 principal components after PCA analysis based on genetic variant information, and top 20 PCs were used as covariables for GWAS to reduce the interference of population structure on results.

Detailed information is not given in several parts of this paper, especially the methodology. How many individuals from the four-goose population? The GWAS analysis were performed in one goose population or the four-goose population? How did the authors do the GWAS analysis and annotation the SNPs? please supply detail analysis steps and analysis models, software. For GWAS analysis model, were there any family or environmental effects? how did you test the significance of the random variables? Many sentences are not clear all over the entire manuscript and need to be re-written. For instance, line 201, "The corresponding genes of significantly related SNPs were used to identify the GO pathway", define the corresponding genes, and how did the GO pathway analysis?

Response: Thank you for your suggestion, we have polished the points you mentioned, please see the manuscript marked yellow.

Line 203, please rewrite the statistical analysis section to provide more detail. For example, authors should define "potential associated" in this section.

Response: Thank you for your comments. Based on the opinions of other reviewers, we deleted this section and integrated relevant information into other analysis section.

Line 283 to 284, "...correlated with any chromosome of the duck genome due to the presence of a large number of tandem repeats". Provide the detail data or the figure(s) to support your claim.

Response: Thank you for your suggestions. We are very sorry that we have described it wrong here. The collinearity analyses use blocks of several genes as basic units to determine whether regions of two genomes are homologous. Therefore, we change to "...were not correlated with any chromosome of the duck genome maybe due to the heterogenous of genes on the chromosome".

Results section

Compare with the quality metrics of this study with the previous four goose genome, including contig N50, scaffold N50, gene number, Repetitive regions proportion of

genome, etc.

Response: Thank you for your comments, we have added Table 2 to compare the assembled genomes of the four goose species (i.e., Zhedong white goose, Sichuan white goose, Tianfu goose and Lion-head goose).

For gene annotation, the authors did not perform the none coding RNA in the goose genome, please supply the analysis.

Response: Thank you for your comments. In this study, mRNA was used for transcriptome sequencing. Sequencing of the none coding RNA was not performed, so annotation analysis of none coding RNA could not be performed. Your suggestions are very constructive, and we will continue to conduct in-depth studies from the whole transcriptome in the future.

The author(s) should perform the positive selection genes analysis with the avian chromosome genomes, such as chicken, duck, zebra finch, etc.

Response: Thank you for your comments. We have conducted gene family expansion and contraction analysis of some avian species that already reflect the selection of functions in various avian species during evolution. We have done the correlation analysis, and the relevant description is in the Line 285-303 of the article. Described as follows: Moreover, we mixed the gene family sets of several Anatidae varieties (duck, Zhedong white goose, Lion-head goose), and performed expansion and contraction analysis and corresponding GO enrichment analysis. In this task, the GO analysis of expanded gene families suggested the olfactory perception, such as detection of chemical stimulus involved in sensory perception of smell (GO:0050911,  $p = 6.97 \times 10^{-8}$ ), and odorant-binding (GO:0005549,  $p = 1.47 \times 10^{-5}$ ), both of which may be related to the adaptation of the species to find food in water. Meanwhile, contracted gene families were concentrated in the areas of glucose synthesis and metabolism, such as hexokinase activity (GO:0004396,  $p = 7.64 \times 10^{-26}$ ), glucose binding (GO:0005536,  $p = 2.30 \times 10^{-22}$ ), cellular glucose homeostasis (GO:0001678,  $p = 6.84 \times 10^{-18}$ ), glycolytic process (GO:0006096,  $p = 1.75 \times 10^{-15}$ ), hexose metabolic process (GO:0019318,  $p = 2.66 \times 10^{-14}$ ), carbohydrate phosphorylation (GO:0046835,  $p = 1.68 \times 10^{-9}$ ), and glucose 6-phosphate metabolic process (GO:0051156,  $p = 1.27 \times 10^{-9}$ ), which may be closely related to characteristics of glycogen storage and utilization during migration. Besides, 220 unique gene families (other species lack these gene families) of the Lion-head goose were identified and functionally annotated in GO categories, such as protein kinase activity (GO:0004672,  $p = 6.85 \times 10^{-9}$ ), the regulation of apoptotic process (GO:0042981,  $p = 5.78 \times 10^{-34}$ ), the adenylate cyclase-modulating G protein-coupled receptor signaling pathway (GO:0007188,  $p = 5.92 \times 10^{-3}$ ), and fatty-acyl-CoA reductase (alcohol-forming) activity (GO:0080019,  $p = 8.94 \times 10^{-5}$ ).

Please supply the detail information of the 40 pseudo-chromosomes for the goose genome assembly.

Response: Thank you for your comments. In fact, we have already uploaded the raw data to the GigaSciences as requested, and provided the circos plot with the corresponding data including the GC content of 40 chromosomes, gene abundance and other information. Meanwhile, we have uploaded the data to the submission system, please check.

Please show the summary of the economic traits used in this study, including the mean, stand error, numbers of individuals, breed, male or female.

Response: Thank you for your comments. We have added tables of descriptive statistics for different goose weights, as shown in Table 3.

line 233-234, "The aggregate of 760 Gb raw reads was accumulated by the paired-end sequencing of the 36 constructed libraries", Why did the authors conduct 760 Gb RNAseq? It is obvious too much larger than previous goose genome annotation, did they perform more analysis?

Response: Thank you for your suggestions. We performed RNA-seq to assist genome assembly and increase the credibility of genome annotations. The 760 Gb of data is composed of 4 individuals, 8 tissues and blood for a total of 36 samples combined, and we have uploaded the transcriptome data to NCBI.

Line 286 to 287, "Chr 4 of Lion-head goose was found to correspond to the sex chromosome Z of duck, except for the inversions of small patches of segments;

therefore, we inferred that Chr 4 was the sex chromosome of the Lion-head goose", To better understand the unique biological characteristics and breeding of geese, it is essential to distinguish the sex chromosomes from the autosomes. For updating the sequence of Z and W chromosomes, it is recommended to filter the sequence of autosomes using experimental methods. How did the authors filter autosomal sequences in the Chr4? Moreover, the W chromosome sequence should be identified similarly to the Z chromosome. Authors should identify the Z and W chromosome sequence from public databases based on the Z and W chromosome sequence from the chromosome-level avian genome.

Response: Thank you for your suggestions. The aim of this study was to construct a complete and accurate genome map of Lion-head goose, and to analyze evolutionary relationship with avian species, and to determine the changes of genome level of different goose species during the selection and breeding process. Refinement analysis and confirmation of sex chromosomes are not the focus, but your suggestion is interesting, and we are curious about it, and we will focus on it in the future. Additionally, this study was used for genome assembly in male Lion-head goose, which have been described at Methods - Animal selection, and males are without W chromosomes.

Line 292-294, "and their weight was recorded, with the Lion-head goose using the minimum weight, the Wuzong goose using the maximum weight, and the Huangzong goose and Magang goose using the average weight." Why did the authors select the body weight trait? The artificial selection would lead to the inaccurate GWAS results. Response: Thank you for your comments. In this study, we did not make artificial selection. We only selected four domestic geese from Guangdong province of China for the association analysis of body weight and SNP. The difference in body weight was due to the goose species themselves, e.g., Lion-head geese weighing more than 9 kg, the Wuzong geese 1.8-2.5kg, Huangzong geese 2.7-4.3kg, and Magang geese 4.8-5.5kg. These weight ranges were obtained from the samples collected, without any artificial selection involved.

From figure 5A, there are significant population stratification in Lion goose population (obvious clustering 2 clusters), how did the authors sure to provide accurate GWAS results? Did the author detect the SNPs associated with body weight in the goose population to test the accurate of GWAS results? The discussion tends to be mere story telling.

Response: Thank you for your suggestions. The stratification of the Lion-head geese mainly due to gender differences. Using PCA analysis to obtain the top 20 principal components as covariables for GWAS, which can reduce the interference of group structure on the results and eliminate the influence of group stratification on the statistical results of GWAS as much as possible. Based on your suggestions, we have revised the discussion to make it more specific and in-depth.

#### Tables and Figures

In table 1, the "Hi-C" results is repeat with the "Assembly", please modify it.

Response: Thank you for your suggestions. We have modified.

The table 2-4, Figure 1-2, are not very informative and I suggest moving these to the supplementary information.

Response: Thank you for your suggestions, we have adjusted all the figures and tables.

Reviewer#2: In this manuscript titled "Chromosome-level genome assembly of goose provides insight into the adaptation and growth of local goose breeds", Zhao et al. Based on PacBio, Bionano and Hi-C technologies, they report a chromosome-level genome assembly of Lion-head goose (*Anser cygnoides*). The assembly had a total genome size of 1.19 Gb, consisting of 1,859 contigs with an N50 length of 20.59 Mb, generating 40 pseudochromosomes, representing 97.27% of the assembled genome, and identifying 21,208 protein-coding genes. To identify genetic markers associated with body weight in different geese breeds including Wuzong goose, Huangzong goose, Magang goose and Lion-head goose, a genome-wide association study was performed, yielding an average of 1,520.6 Mb of raw data with detecting 44,858 SNPs. GWAS showed that six SNPs were significantly associated with body weight and 25 were potentially associated. The writing of the paper is mostly clear, except a few

things I would like to have them clarified (or re-written):

(1) Line 209, "sequencing strategies" should be replaced with "sequencing and genome assemble strategies".  
Response: Thank you for your suggestions. We have revised it according to your suggestion.

(2) Line 210, "Hi-C" should be replaced with "Hi-C approach".  
Response: Thank you for your suggestions. We have modified it according to your suggestion.

(3) Line 233, "four healthy adult animals" should be replaced with "four healthy adult individuals".  
Response: Thank you for your comments. We have modified it according to your suggestion.

(4) Line 243-244, "eight bird species (Lion-head goose, Zhedong white goose, duck, turkey, chicken, pigeon, saker, and titmouse) and green lizard". Please give the very exact Latin name and the article published after the sequencing of the genome of the eight bird species.  
Response: Thank you for your comments. We have added the very exact Latin name.

(5) Line 273, gene name (Sterile) should be italic.  
Response: Thank you very much for your comments and suggestions. We have revised the above problems and marked them in yellow in the text.

(6) Line 296, "The average raw data was 1,520.60 Mb". What kind of data is this raw data?  
Response: Thank you for your comments. We may not have elaborated well in the original manuscript; this kind of data is about the resequencing data of 514 goose blood samples. And we have revised it as follows: Blood from each sample was used for paired-end 100 resequencing. And the average raw data was 1,520.60 Mb. Marked yellow on L327.

(7) Lines 290-306, The logic of paragraph Cluster analysis of different goose species was confused. What is the purpose of this analysis?  
Response: Thank you for your comments. This part of the study was conducted by whole-genome resequencing of blood samples from four goose populations to identify genetic variants and demonstrate the great phenotypic differences among the four goose populations by PCA and phylogenetic trees, followed by genome-wide association analysis of SNPs with body weight of different goose species to mine the available functional SNPs.

(8) Line 299, please use uniform scientific notation,  $10e-7$  should be  $\times 10^{-7}$ .  
Response: Thank you for your comments. We have refined this.

(9) The PCA results in Figure 5A need a statistic test.  
Response: Thank you for your comments. The main purpose of PCA analysis is to visualize between- and within-group differences in subgroups, and top PC20 of PCA is also used for statistical analysis of GWAS to reduce the interference of group structure on the results.

(10) Lines 258-271, 310, 317, Pvalue or P? The form in the whole manuscript should remain uniform.  
Response: Thank you for your comments. We have performed a full-text check of the Pvalue and unified them as "p".

Reviewer #3: Zhao et al.  
Title: "Chromosome-level genome assembly of goose provides insight into the adaptation and growth of local goose breeds"  
- please place figures and tables within the text, not at the end: this makes it difficult to read and review the article (From editors: you can disagree this comment)  
- English: needs to be improved  
Response: Thank you for your comments. The English of this manuscript has been improved according to your suggestion.



- Figures: low quality, low resolution --> hard to read. Additionally, Figure legends/captions are separate from Figures --> difficult reading  
Response: Thank you for your comments. We have uploaded the high-definition images and put them together with the legends.

#### Introduction

-----

L44: what do you mean with "the majority of birds"?

Response: Thank you for your comments. It means most birds of Anseriformes, and we have polished it.

L51: warmth retention of the birds?

Response: Thank you for your comments. We changed it to "the warmth properties of feather products".

L63: " ... while IN the Wuzong goose ... the average weight is ..."

Response: Thank you for your comments. We have modified it.

L67: how is an accurate reference genome essential to decipher the industry's development? Which industry?

Response: Thank you for your comments. We revised it to "improving production efficiency and even promoting the development of goose industry."

L73: maybe it's new scaffolding techniques

Response: Thank you for your comments. We have modified it.

L80-81: here you mention two sequencing technologies (SMRT, Illumina NGS), one scaffolding method (Hi-C) and one unspecified technology/methods by Bionano (which was not mentioned earlier). Please rephrase and be more specific and clearer

Response: Thank you for your comments. Thank you for your comments. We have described the Bionano optical mapping technology as described below: Bionano optical mapping technology has advantages in obtaining highly repetitive sequences and detecting genomic structural variants, which is helpful for remote sequencing of sequence overlap clusters. Bionano has become a powerful tool for genome assembly, a 5.1 Mbp inversion was found in the genomes of a patient with Duchenne muscular dystrophy. Displayed in L88-91.

L81: correlation of body weight with what?

Response: Thank you for your comments. Correlation of body weight with genetic variations.

#### Methods

-----

L119-181: how were Bionano maps used to improve the quality of your genome assembly?

Response: Thank you for your comments. This sentence is a general introduction to the whole text, and we describe the relevant methods and parameters after the sentence: "Afterward, the data were assembled with RefAligner and Assembler of BioNano Solve. The scaffold was established using BioNano Solve with HERA's contigs and a BioNano genome map. When encountering a conflict between a contig and the genome map, the contig was split to correct the false connection".

L136: adult accessions?

Response: Thank you for your comments. We have changed "adult accessions" to "adult Lion-head goose".

L142: how were low-quality reads defined? Based on average Phred scores?

Response: Thank you for your comments. Adaptors and low-quality reads of raw data were removed using Trimmomatic and the sequence will be trimmed according to the base quality value (i.e. Phred scores) with the following parameters: LEADING:3 TRAILING:3 SLIDINGWINDOW:4:15 -threads 20 MINLEN:50, and other default.

L143: what do you mean by polluted reads?

Response: Thank you for your comments. Polluted reads are erroneous sequences such as those containing more than 5% of N base due to systematic errors.

L143: what do you mean with "Trinity was arranged"?

Response: Thank you for your comments. We have changed "Trinity was arranged" to "Trinity was used".

L148-150: poor English, please rephrase. Additionally, more details are needed on the quality metrics used to evaluate the assembled genome

Response: Thank you for your comments. The reference library used for BUSCO evaluation is aves\_odb10, and the rest of the parameters are BUSCO default, so no detailed parameters are listed.

L164-165: could you add the scientific names (genus species) of the mentioned avian species? (green lizard is not an avian species)

Response: Thank you for your comments. We have made changes and additions, and the changes are as follows "we compared the gene families of Lion-head goose with the genomes of the following avian species: Zhedong white goose (*Anser cygnoides*), duck (*Anas platyrhynchos*), turkey (*Meleagris gallopavo*), chicken (*Gallus gallus*), pigeon (*Columba livia*), saker (*Falco cherrug*), titmouse (*Pseudopodoces humilis*), and green lizard (*Anolis carolinensis*)."

L173: from where did you get the divergence time between turkeys and pigeons? (~100 million years? Really?) And why did you choose this specific divergence value for calibration?

Response: Thank you for your comments. Divergence time data were obtained from the website <http://www.timetree.org/>. Pigeon and turkey divergence times were chosen as controls because these two species are genetically distant in avian species and have lower correction errors.

L173: the r8s software was served to estimate: bad English

Response: Thank you for your comments. We have changed "served" to "used".

L179: "Experimental sample processing and genotyping" this is a bit unclear: you already took biological samples, maybe you need to highlight that this is genotyping (your title should be more about genotyping and phenotyping for GWAS, since you spend the first few lines of the paragraph to describe the phenotypes)

Response: Thank you for your comments. We have changed "Experimental sample processing and genotyping" to "Experimental sample processing and variant detection for Genome-wide association study".

L181-185: body weight is naturally a continuous trait, it would be rather arbitrary to split it into categories: therefore I don't understand this whole bit on categorical vs continuous body weight

Response: Thank you for your comments. This may be due to our choice of species, each species has a wide range of body weight, but basically within a relatively fixed range. The detailed values are as follows: 9-14 kg for Lion-head goose, 2.7-4.3 kg for Huangzong goose, 1.8-2.5 kg for Wuzong goose, and 4.8-5.5 kg for Magang goose. Although there seems to be some stratification, we still consider their weight as a continuous variable.

L186-190: what you describe is RAD-sequencing/GBS/resequencing, not "genotyping". By genotyping usually an array-based approach is meant

Response: Thank you very much for your professional opinion. We have improved it by removing the description of "genotyping" and modifying it as follows: "Then variant detection as well as genotyping was performed using Samtools, GATK4 software".

L188: how did you define low quality reads here? (Phred scores?) No filters on average reads coverage per site?

Response: Thank you for your comments. Low quality threshold parameters set to 5.

L191: it is not clear which variants were called? SNP? MNP? Indels? All? etc.

Response: Thank you for your comments. It means SNP variants, and we have modified in the manuscript.

|                                |                                                                                                                                                                                                                                                                                                                                                                                                                                                                                                                                                                                                                                                                                                                                                                                                                                                                                                                                                                                                                                                                                                                                                                                                                                                                                                                                                                                                                                                                                                                                                                                                                                                                                                                                                                                                                                                                                                                                                                                                                                                                                                                                                                                                                                                                                                                                                                                                                                                                                                                                                                                                                                                                                                                                                                                                                                                                                                                                                                                                                                                                                                                                                                                                                                                                                |
|--------------------------------|--------------------------------------------------------------------------------------------------------------------------------------------------------------------------------------------------------------------------------------------------------------------------------------------------------------------------------------------------------------------------------------------------------------------------------------------------------------------------------------------------------------------------------------------------------------------------------------------------------------------------------------------------------------------------------------------------------------------------------------------------------------------------------------------------------------------------------------------------------------------------------------------------------------------------------------------------------------------------------------------------------------------------------------------------------------------------------------------------------------------------------------------------------------------------------------------------------------------------------------------------------------------------------------------------------------------------------------------------------------------------------------------------------------------------------------------------------------------------------------------------------------------------------------------------------------------------------------------------------------------------------------------------------------------------------------------------------------------------------------------------------------------------------------------------------------------------------------------------------------------------------------------------------------------------------------------------------------------------------------------------------------------------------------------------------------------------------------------------------------------------------------------------------------------------------------------------------------------------------------------------------------------------------------------------------------------------------------------------------------------------------------------------------------------------------------------------------------------------------------------------------------------------------------------------------------------------------------------------------------------------------------------------------------------------------------------------------------------------------------------------------------------------------------------------------------------------------------------------------------------------------------------------------------------------------------------------------------------------------------------------------------------------------------------------------------------------------------------------------------------------------------------------------------------------------------------------------------------------------------------------------------------------------|
|                                | <p>L191: why did you set the MAF threshold at 5%? You have 514 samples, with a filter at MAF 1% you'd still have more than 10 copies of the minor allele in the worst case scenario<br/> Response: Thank you for your comments. Because MAF threshold at 5% is a conventional threshold, this is to ensure that this SNP analysis remains consistent with previous and subsequent analyses, and does not introduce additional systematic errors.</p> <p>L192: maximum deletion threshold? Is this max missing rate?<br/> Response: Thank you for your suggestion, we have modified it.</p> <p>L192-193: what was the objective of PCA? PCA on which data? (I guess the genotype data? Which?)<br/> Response: Thank you for your comments. In this study, PCA was performed based on SNP variation information to extract the main principal components, and the top principal components were used as dependent variables for genome-wide association analysis.</p> <p>L193-194: "To understand the kinship among the samples, and phylogenetic trees were constructed." This sentence seems wrong/incomplete<br/> Response: Thank you for your comments. We made the following changes: To understand the kinship among the samples, and the phylogenetic trees were constructed using SNP data with Phylip software.</p> <p>L196: maybe you mean genetic variation?<br/> Response: Thank you for your suggestion, we have modified it.</p> <p>L197: did you use the --linear option in Plink?<br/> Response: Thank you for your suggestion, GWAS analysis was done for both the assoc model and the linear model in Plink.</p> <p>L197-199: this sentence is poorly written, please rephrase<br/> Response: Thank you for your comments. We modified it to "The top 20 PCs in the PCA analysis were used as covariates, and regression analysis was performed on sample variances with corresponding weight information by Plink."</p> <p>L199: I guess its the variants, not the variances (if it is SNPs, please say SNPs)<br/> Response: Thank you for your comments. We modified it to "SNPs".</p> <p>L196-200: I think it would be better if you wrote the GWAS model explicitly (the model equation)<br/> Response: Thanks to your suggestion, we have added the model to line 212-232.</p> <p>L200: why did you choose Bonferroni correction over other methods to control for spurious results (e.g. FDR, Bayesian odds, permutation test, q-values etc.)<br/> Response: Thank you for your comments. Because the Bonferroni correction is more rigorous, it is more effective in removing false positive results.</p> <p>L202: this part is useless, as it is: which statistical analysis? Why did you choose the 0.05 threshold for significance? (you just said above that you used Bonferroni corrected p-values for GWAS)<br/> Response: Thank you for your suggestion, we have removed this section.</p> <p>Results<br/> -----<br/> L211: "Assemble these data step by step and produce progressively improved assemblies (Fig. 1A)." This sentence seems incomplete or wrong<br/> Response: Thank you for your comments. We modified it to "We assemble these data step by step and produce generate progressively improved assemblies assembled genome".</p> |
| <b>Additional Information:</b> |                                                                                                                                                                                                                                                                                                                                                                                                                                                                                                                                                                                                                                                                                                                                                                                                                                                                                                                                                                                                                                                                                                                                                                                                                                                                                                                                                                                                                                                                                                                                                                                                                                                                                                                                                                                                                                                                                                                                                                                                                                                                                                                                                                                                                                                                                                                                                                                                                                                                                                                                                                                                                                                                                                                                                                                                                                                                                                                                                                                                                                                                                                                                                                                                                                                                                |
| <b>Question</b>                | <b>Response</b>                                                                                                                                                                                                                                                                                                                                                                                                                                                                                                                                                                                                                                                                                                                                                                                                                                                                                                                                                                                                                                                                                                                                                                                                                                                                                                                                                                                                                                                                                                                                                                                                                                                                                                                                                                                                                                                                                                                                                                                                                                                                                                                                                                                                                                                                                                                                                                                                                                                                                                                                                                                                                                                                                                                                                                                                                                                                                                                                                                                                                                                                                                                                                                                                                                                                |

|                                                                                                                                                                                                                                                                                                                                                                                                                                                                                                                                     |            |
|-------------------------------------------------------------------------------------------------------------------------------------------------------------------------------------------------------------------------------------------------------------------------------------------------------------------------------------------------------------------------------------------------------------------------------------------------------------------------------------------------------------------------------------|------------|
| <p>Are you submitting this manuscript to a special series or article collection?</p>                                                                                                                                                                                                                                                                                                                                                                                                                                                | <p>No</p>  |
| <p><b>Experimental design and statistics</b></p> <p>Full details of the experimental design and statistical methods used should be given in the Methods section, as detailed in our <a href="#">Minimum Standards Reporting Checklist</a>. Information essential to interpreting the data presented should be made available in the figure legends.</p> <p>Have you included all the information requested in your manuscript?</p>                                                                                                  | <p>Yes</p> |
| <p><b>Resources</b></p> <p>A description of all resources used, including antibodies, cell lines, animals and software tools, with enough information to allow them to be uniquely identified, should be included in the Methods section. Authors are strongly encouraged to cite <a href="#">Research Resource Identifiers</a> (RRIDs) for antibodies, model organisms and tools, where possible.</p> <p>Have you included the information requested as detailed in our <a href="#">Minimum Standards Reporting Checklist</a>?</p> | <p>Yes</p> |
| <p><b>Availability of data and materials</b></p> <p>All datasets and code on which the conclusions of the paper rely must be either included in your submission or deposited in <a href="#">publicly available repositories</a> (where available and ethically appropriate), referencing such data using a unique identifier in the references and in the “Availability of Data and Materials” section of your manuscript.</p> <p>Have you have met the above requirement as detailed in our <a href="#">Minimum</a></p>            | <p>Yes</p> |

[Standards Reporting Checklist?](#)

# 1 **Chromosome-level genome assembly of goose provides insight into** 2 **the adaptation and growth of local goose breeds**

3 **Qiqi Zhao<sup>1,3,5</sup>, Junpeng Chen<sup>2</sup>, Zi Xie<sup>1,3,5</sup>, Jun Wang<sup>4</sup>, Keyu Feng<sup>1,3,5</sup>, Wencheng Lin<sup>1,3,5</sup>, Hongxin**  
4 **Li<sup>1,3,5</sup>, Zezhong Hu<sup>1</sup>, Weiguo Chen<sup>1,3,5</sup>, Feng Chen<sup>1,3</sup>, Muhammad Junaid<sup>4</sup>, Huanmin Zhang<sup>6</sup>,**  
5 **Zhenping Lin<sup>2\*</sup>, Qingmei Xie<sup>1,3,5\*</sup>, Xinheng Zhang<sup>1,3,5\*</sup>**

6 <sup>1</sup>Heyuan Branch, Guangdong Provincial Laboratory of Lingnan Modern Agricultural Science and  
7 technology & Guangdong Provincial Key Lab of Agro-Animal Genomics and Molecular Breeding,  
8 College of Animal Science, South China Agricultural University, Guangzhou, Guangdong 510642,  
9 China; <sup>2</sup>Shantou Baisha Research Institute of Original Species of Poultry and Stock, Shantou,  
10 Guangdong 515000, China; <sup>3</sup>Department of Science and Technology of Guangdong Province, Key  
11 Laboratory of Animal Health Aquaculture and Environmental Control, Guangzhou, Guangdong 510642,  
12 China; <sup>4</sup>College of Marine Sciences, South China Agricultural University, Guangzhou, Guangdong,  
13 510642, China; <sup>5</sup>Guangdong Engineering Research Center for Vector Vaccine of Animal Virus,  
14 Guangzhou, 510642, China and <sup>6</sup>Avian Disease and Oncology Laboratory, Agriculture Research Service,  
15 United States Department of Agriculture, East Lansing, MI, 48823, USA

16 \* Correspondence address:

17 Zhenping Lin, Shantou Baisha Research Institute of Original Species of Poultry and Stock, Shantou,  
18 China. E-mail: Linzp02@163.com; Qingmei Xie and Xinheng Zhang, College of Animal Science, South  
19 China Agricultural University, Guangzhou, China. E-mails: qmx@scau.edu.cn (Q.X.);  
20 xhzhang@scau.edu.cn (X.Z.)

21 **running title:** Goose chromosome-level Genome Assembly

22 **Abstract**

23 **Background:** *Anatidae* contains numerous waterfowl species with great economic value, but the  
24 genetic diversity basis remains insufficiently investigated. Here, we report a chromosome-level genome  
25 assembly of Lion-head goose (*Anser cygnoides*), a native breed in South China, through the combination  
26 of PacBio, Bionano and Hi-C technologies. **Findings:** The assembly had a total genome size of 1.19 Gb,  
27 consisting of 1,859 contigs with an N50 length of 20.59 Mb, generating 40 pseudochromosomes,  
28 representing 97.27% of the assembled genome, and identifying 21,208 protein-coding genes.  
29 Comparative genomic analysis revealed that geese and ducks diverged approximately 28.42 million  
30 years ago, and geese have undergone massive gene family expansion and contraction. To identify genetic  
31 markers associated with body weight in different geese breeds including Wuzong goose, Huangzong  
32 goose, Magang goose and Lion-head goose, a genome-wide association study was performed, yielding  
33 an average of 1,520.6 Mb of raw data with detecting 44,858 SNPs. GWAS showed that six SNPs were  
34 significantly associated with body weight and 25 were potentially associated. The significantly  
35 associated SNPs were annotated as *LDLRAD4*, *GPR180*, *OR*, enriching in growth factor receptors  
36 regulation pathways. **Conclusions:** We present the first chromosome-level assembly of the Lion-head  
37 goose genome, which will expand the genomic resources of the *Anatidae* family, providing a basis for  
38 adaptation and evolution. Candidate genes significantly associated with different goose breeds may  
39 serve to understand the underlying mechanisms of weight differences.

40 **Keywords:** Lion-head goose, Genome assembly, Comparative genome, Genome-wide association study

41

## 42 Introduction

43 The *Anatidae* is a family of the ancient *Aves* class with order *Anseriformes*, containing 43 genera  
44 and 174 species, including most birds of *Anseriformes*, such as ducks, geese, swans, and is the most  
45 prominent family of swimming birds [1]. Physical characteristics and features vary significantly among  
46 species, making the *Anatidae* family rich in diversity and specificity. *Anatidae* adults are usually  
47 herbivores, feeding on a variety of aquatic plants, which are well suited to sustainable production  
48 practices thereby reducing competition for human food; and some species are even used for crop weeds  
49 and pests control [1, 2]. For a long time, duck and goose feathers have been popular in pillows, quilts  
50 and coats [3]. Several species in the genus *Anser* are commercially important and domesticated as  
51 poultry because of their meat-producing performance and the warmth properties of feather products.  
52 According to archaeological evidence, geese were domesticated around 6,000 years ago near the  
53 Mediterranean Sea, and later spread around the world due to human activities [4]. It is widely believed  
54 that *Anser cygnoides* is the ancestor of the Chinese goose (*Anser cygnoides domesticus*) with a  
55 domestication history of more than 3,000 years [1]. After artificial domestication, the domestic goose  
56 has increased its cold tolerance and roughage-resistance, but its wings are degraded and weakened in  
57 flight, unable to travel long distances [1]. Egg-laying rate and goslings survival rate are also improved  
58 compared to wild swans, and the lifespan is longer [5]. Furthermore, overfeeding can cause foie gras to  
59 be at least three-fold larger than the normal size while the goose remains healthy, making the goose a  
60 good model to study human liver steatosis [6]. Chinese domestic geese is a natural gene pool containing  
61 local breeds of diverse phenotypes, and adult domestic geese from similar region vary greatly in weight  
62 [7]. For example, the Lion-head goose in Shantou (116°14'-117°19' E, 23°02'-23°38' N), Guangdong  
63 Province, can weigh more than 9 kg, while in the Wuzong goose from Qingyuan (111°55'-113°55' E,  
64 23°31'-25°12' N), Guangdong Province, the average weight is only about 3 kg [8, 9]. The Lion-head  
65 goose has a large body, a deep and wide head, and large sarcomas (five sarcomas) on the front and side  
66 of the face (Fig. 1). The adult male goose weighs 9-10 kg and the female goose 7.5-9 kg, grows rapidly  
67 and has rich muscles. Wuzong goose is a small goose species with a distinct band of black plumage from



68 neck to back. The gander weighs 3-3.5kg and the female weighs 2.5-3kg, with wide and short body, flat  
69 back, and thin and short feet. Magang goose is a medium-sized goose species, with a long head, wide  
70 beak, rectangular body, a gray-black bristle-like feathers on the back of the neck, gray brown breast  
71 feathers and white belly feathers. Adult weight is 4-5 kg for males and 3-4 kg for females. Huangzong  
72 goose has a compact body, from the top of the head to the back of the neck has a brownish yellow feather  
73 belt, shaped like a horse's mane. The chest feather is gray yellow, the belly feather is white, the beak and  
74 sarcoma is black. Adult males weigh 3-3.5 kg, females 2.5-3 kg. However, the mechanisms for such  
75 differences have not been clarified, let alone being resolved at the genomic level. Therefore, a complete,  
76 continuous and accurate reference genome is essential, for deciphering genomic diversity, evolutionary  
77 and adaptive processes, improving production efficiency and even promoting the development of goose  
78 industry.

79 High-quality genome assembly sequences enable us to comprehensively and scientifically decode  
80 the genetic diversity of species, explore disease mechanisms, and understand species evolution. Recently,  
81 Pacbio has offered technology that can generate reads several thousand bases in size, and these long  
82 reads can span repetitive regions [10]. Although these long reads have a high error rate, they can be  
83 integrated with Illumina's short reads to improve sequencing accuracy [11]. In addition, new scaffolding  
84 techniques, such as high-throughput chromosome conformation capture (Hi-C), allow the genome to be  
85 assembled to the level of whole chromosomes [12]. Pacbio single molecule real-time (SMRT)  
86 sequencing technology has been extensively used in the study of human diseases such as tuberculosis  
87 and influenza virus [13], as well as in the study of species evolution, such as the centromere of the  
88 human Y chromosome [14]. Bionano optical mapping technology has advantages in obtaining highly  
89 repetitive sequences and detecting genomic structural variants, which is helpful for remote sequencing  
90 of sequence overlap clusters[15]. Bionano has become a powerful tool for genome assembly, a 5.1 Mbp  
91 inversion was found in the genomes of a patient with Duchenne muscular dystrophy[16].

92 In this study, we report the genome assembly at the chromosome level in Lion-head geese for the  
93 first time using combined data generated by four advanced technologies, Illumina, SMRT, Bionano, and  
94 Hi-C. In addition, we investigated the relationship between body weight and genetic variations in Lion-

95 head goose, Wuzong goose, Huangzong goose and Magang goose by genome-wide association analysis,  
96 trying to identify the genes involved in body weight determination from different species. These will  
97 offer valuable resources for facilitating genetic research and the improvement of the species and for  
98 studying speciation and evolution in geese.

## 99 **Methods**

### 100 **Animal selection**

101 An adult healthy purebred male Lion-head goose (*Anser cygnoides*) with classical traits was selected for  
102 whole-genome sequencing and conducting *de novo* assembly from Shantou Baisha Research Institute  
103 of Original Species of Poultry and Stock. Blood and eight tissues (i.e., brain, pharyngeal pouch, head  
104 sarcoma, spleen, liver, chest muscle, kidney, and heart) from another four **healthy adult individuals** were  
105 collected for RNA-seq analysis. All applicable institutional and national guidelines for the care and use  
106 of animals were followed. All the animal work in this study was approved by the South China  
107 Agricultural University Committee for Animal Experiments (approval ID: SYXK 2019-0136). All the  
108 research procedures and animal care activities were conducted based on the principles stated in the  
109 National and Institutional Guide for the Care and Use of Laboratory Animals.

### 110 **Genome survey library construction and sequencing**

111 To survey the genome profile, high-quality genomic DNA was extracted from the blood of the reference  
112 individual for whole-genome sequencing using the Qiagen Blood and Cell Culture DNA Midi Kit  
113 according to the manufacturer's instructions. For the quality control of purity, concentration, and  
114 integrity, we used Qubit 2.0 Fluorometry (Life Technologies, USA), NanoDrop 2000 spectrophotometer  
115 (Thermo Scientific), and pulse-field gel electrophoresis (Bio-rad CHEF-DR II), respectively. The  
116 following steps used for DNA extraction and quality control were similar. The short paired-end Illumina  
117 DNA library was constructed using the Illumina HiSeq system (with the paired-end 350 bp sequencing  
118 strategy). After performing the sequencing and obtaining the data, the k-mer analysis of reads for the  
119 genome survey was calculated by the Jellyfish program with the default parameters. Additionally, the  
120 genome size, heterozygosity ratio, and repeat sequence ratio were calculated with the GenomeScope

121 tool based on the k-mer frequency of 17.

## 122 **Genome sequencing and assembly strategies**

123 A 40 kb *de novo* library for SMRT genome sequencing was constructed using the PacBio Sequel III  
124 platform (Pacific Biosciences, USA). All of these reads were used for contigs assembly. A scalable and  
125 accurate long-read assembly tool, Canu (v1.8) [17], was employed to correct and assemble the PacBio  
126 reads with the listed parameters (minThreads = 4, genome size = 1200m, minOverlapLength = 700,  
127 minReadLength = 1000). The resulting contigs and corrected reads were used as inputs for HERA [18]  
128 to fill the gaps and produce longer contigs with default parameters. After that, Illumina paired-end clean  
129 data were mapped to the corrected contigs with the Burrows-Wheeler Aligner (BWA) [19], and the  
130 results were filtered by Q30 with Samtools (v1.8) [20]. At last, Pilon (v1.22) [21] was used to polish the  
131 assembly and enhance the base accuracy of the contigs.

132 Physical optical genome maps from BioNano were used to improve the assembly quality of the  
133 genome, with the ultimate goal of generating a chromosome-scale assembly. Nuclear DNA was  
134 extracted from the blood sample of the reference individual and digested with nickase Direct Labeling  
135 Enzyme I. After labeling, repairing and staining reactions, DNA was loaded onto the Saphyr Chip for  
136 sequencing to generate BioNano molecules. Afterward, the data were assembled with RefAligner and  
137 Assembler of BioNano Solve. The scaffold was established using BioNano Solve with HERA's contigs  
138 and a BioNano genome map. When encountering a conflict between a contig and the genome map, the  
139 contig was split to correct the false connection.

140 For Hi-C library, fresh blood was vacuum-infiltrated with 2% formaldehyde solution and then used  
141 for cross-link action. Later nuclear DNA was isolated from the reference animal and digested with the  
142 restriction enzyme Mbo I. The Hi-C library with insertion sizes of 350 bp was constructed and sequenced  
143 on the Illumina HiSeq X Ten instrument. The Hi-C reads were assigned to the scaffolds by Juicer [22].  
144 The scaffolds were further clustered, ordered, and oriented to the chromosome-level scaffolds by 3D-  
145 DNA [23]. Thus, a heatmap of Hi-C chromosomal interaction was created using the HiC-pro software  
146 [24].

## 147 **RNA-Seq and transcripts assembly**

148 RNA-seq was conducted on blood and eight different tissues (i.e., brain, pharyngeal pouch, head  
149 sarcoma, spleen, liver, chest muscle, kidney, and heart) from four **healthy adult Lion-head goose**. Total  
150 RNA was extracted from four individuals using the TRIZOL reagent and purified following the  
151 manufacturer's protocols. The concentration and quality of the isolated RNA were assessed using the  
152 Nanodrop Spectrophotometer, Qubit 2.0 Fluorometry, and the Agilent 2100 bioanalyzer (Agilent  
153 Technologies, USA). Libraries construction and sequencing were performed using the Illumina  
154 NovaSeq 6000 platform. Raw RNA-seq data with 150 bp paired-end reads were trimmed for quality  
155 using Trimmomatic [25]. Thus, the Illumina sequence adaptors were removed, then **low-quality reads**  
156 **based on Phred scores and polluted reads containing N > 5% were trimmed, using the following**  
157 **parameters: LEADING:3 TRAILING:3 SLIDINGWINDOW:4:15 -threads 20 MINLEN:50.**  
158 **Furthermore, Trinity [26] was used** to *de novo* assemble the data after quality filtering. To remove  
159 redundant sequences, CD-HIT [27] was employed to remove highly identical transcript isoforms,  
160 retaining only the longest one. After filtering, the RNA-seq reads were mapped to the assembled genome  
161 using the default parameters of STAR [28].

## 162 **Assembly evaluation**

163 Finishing the genome assembly, quality control for the assembly's quality, accuracy, and integrity was  
164 predicted by Benchmarking Universal Single-Copy Orthologs (BUSCO, v 3.0), using aves\_odb10 as  
165 the query [29].

## 166 **Genome annotation**

167 The genome assembly was annotated by MAKER, mainly including gene annotation and repeat  
168 annotation. The detailed pipeline was based on proteins from the Uniprot, the *de novo* assembly of RNA-  
169 seq data, and the total proteins of the relative species *Anser cygnoides* [30]. The transposable elements  
170 (TE) associated genes that were filtered out by the TEseeker database, and the results were used to  
171 conduct functional annotation using InterProScan. The repeat sequencing library was identified and  
172 annotated by a combination of LTR-FINDER and RepeatModeler. RepeatMasker and the query species  
173 "Chicken" were used to mask the repeats in the assembly, based on the Repbase database and the  
174 previous repeat sequence library. Tandem repeats were discovered by the Tandem Repeats Finder [31].

## 175 **Gene families and phylogenetic analysis**

176 Interspecific syntenic blocks between the Lion-head goose and duck were explored using MCscan [32]  
177 after coding sequence alignment by BLASTn. The same method was used for intraspecific collinearity  
178 analysis. To gain insight into the gene family evolution of the goose, we compared the gene families of  
179 Lion-head goose with the genomes of the following avian species: Zhedong white goose (*Anser*  
180 *cygnoides*), duck (*Anas platyrhynchos*), turkey (*Meleagris gallopavo*), chicken (*Gallus gallus*), pigeon  
181 (*Columba livia*), saker (*Falco cherrug*), titmouse (*Pseudopodoces humilis*), and green lizard (*Anolis*  
182 *carolinensis*). Initially, alternative splicing and genes encoding less than 50 amino acids with a  
183 proportion of stop codon greater than 20% were filtered; meanwhile, the longest transcript of genes with  
184 multiple isoforms was retained to represent the gene. Similarity relationships among the protein  
185 sequences of species were aligned by BLASTP algorithm and clustered using OrthoMCL methodology  
186 with an expansion coefficient of 1.5 to obtain single- and multiple-copy gene families, and specific gene  
187 families of Lion-head goose. The sequences of the single-copy gene families were employed to perform  
188 multiple alignments by MUSCLE. Then RAxML [33] was used to construct a phylogenetic tree of nine  
189 species, with the green lizard (*Anolis carolinensis*) being designated an outgroup. Taking the divergence  
190 time of the pigeon and turkey (92.9Mya, <http://www.timetree.org/>) as the calibration, the r8s [34]  
191 software was used to estimate the divergence time of the species and construct ultrametric trees. After  
192 filtering out gene families with gene counts of more than 100 in some individual species, CAFÉ [35]  
193 was employed to detect gene families that had undergone expansion or contraction per million years  
194 independently along each branch of the phylogenetic tree. Subsequently, a gene ontology (GO)  
195 enrichment analysis of gene families was performed using the clusterProfiler package in R [36].

## 196 **Experimental sample processing and variant detection for Genome-wide association study**

197 Blood samples of 514 geese (including Lion-head goose, Wuzong goose, Huangzong goose and Magang  
198 goose) were collected and stored in 2 mL tubes containing ACD anticoagulant for DNA extraction, and  
199 the weight of the geese was recorded. DNA was extracted from blood samples using the HiPure Blood  
200 DNA Mini Kit (Magenbio, Guangzhou, China). The samples that passed the quality testing were

201 subjected to library construction using Easy DNA Library Prep Kit (MGI, Shenzhen, China) and paired-  
202 end 100 sequencing using MGISEQ 500. Raw data were filtered for adaptors and low quality reads using  
203 SOAPnuke software, low quality threshold parameters set to 5, and the filtered sequences were  
204 compared with the constructed goose reference genome using BWA software with parameters: mem, -  
205 M. Then variant detection was performed using Samtools, GATK4 software with parameters:  
206 HaplotypeCaller -ERC GVCF. SNP variants were filtered based on a minimum allele frequency  
207 threshold of 0.05, a Hardy Weinberg equilibrium test significance threshold of  $10^{-7}$ , and a max missing  
208 rate threshold of 0.7. Principal component analysis (PCA) was performed and plotted with R. To  
209 understand the kinship among the samples, the phylogenetic trees were constructed using SNP data with  
210 Phylip software.

#### 211 **Genome-wide association study**

212 The genetic variation was analyzed with individual corresponding weight information using the  
213 asymptotic Wald test (assoc) in Plink. The top 20 PCs in PCA analysis were used as covariates, and  
214 linear analysis was performed on sample variances with corresponding weight information by Plink. And  
215 the common parameters in two types of model analysis is --allow-extra-chr --allow-no-sex -out, where  
216 the assoc parameter is -assoc and the linear parameter is --linear --covar plink.eigenvec. The statistical  
217 analysis model for genome-wide association analysis was as follows:

$$218 \quad P = \mu + Z\alpha + \text{SNP} + e$$

219 where P is the phenotypic variable;  $\mu$  is the intercept; Z is the random multigene effect relationship  
220 matrix;  $\alpha$  is the random multigene effect; SNP is the SNP effect; e is the residual, distributed as  $e \sim (0, I$   
221  $\sigma_e)$ , and I is the unit matrix.

222 Genome-wide 5% significance threshold was determined using the Bonferroni method. To reduce  
223 false negative, the threshold was expanded by 20-fold as a second threshold and the SNP in this region  
224 was defined as potentially associated. The SNPs with Bonferroni corrected p-values less than 0.05 in  
225 the results of the assoc and linear analyses were annotated. The corresponding genes annotated with  
226 significantly related SNPs were used to identify the GO pathway.

#### 227 **Selective-sweep analysis**

228 To analyze regions affected by long-term selection and are associated with domestication of geese, we  
229 calculated the Fixation indices ( $F_{ST}$ ) for four goose species using vcftools software with sliding  
230 windows length of 20 kb that had a 10-kb overlap between adjacent windows. The top 5% of regions  
231 were designated as candidate selective regions and the genes in these regions were considered as  
232 candidate genes.

## 233 Results

### 234 Genome sequencing and assembly

235 The Lion-head goose is a famous local variety in China and one of the most giant goose breeds  
236 worldwide, with a unique appearance and social benefits. Here, we attempt to construct a highly  
237 continuous chromosome-scale genome of an adult purebred male Lion-head goose with a high degree  
238 of homozygosity to minimize heterozygous alleles. The following sequencing and genome assemble  
239 strategies were applied: Illumina sequencing, Pacbio SMRT sequencing, BioNano optical mapping, and  
240 Hi-C approach (Supplementary Table S1). We assemble these data step by step and generate  
241 progressively improved assembled genome (Supplementary Figure S1). A total of 185.37 Gb of high-  
242 quality Pacbio long reads were generated, representing a  $\sim 168\times$  depth of the estimated 1.05 Gb genome  
243 with heterozygosity of 0.335% based on the k-mer analysis of the Illumina sequences (Supplementary  
244 Figure S1, Supplementary Table S2). Combing the *de novo* assembly of the Illumina and Pacbio  
245 sequences resulted in a draft genome of 1.20 Gb, yielding 1,859 contigs with a length of 13.7 Mb for  
246 contig N50 and 57.6 Mb for the longest (Table 1). Furthermore, with the help of BioNano optical  
247 mapping, the scaffold N50 value was increased to 37 Mb. To obtain a chromosome-scale assembly, a  
248 set of  $\sim 230$  Gb Hi-C data was used to orient, order, phase, and anchor the contigs. Approximately 97.27%  
249 of the reads assembled were anchored to 40 high-confidence pseudo-chromosomes (39 autosomes and  
250 Z chromosome) using the high-density genetic map (Supplementary Figure S1, Fig. 2). After polishing,  
251 we finally assembled the ultimate genome into 1.19 Gb with the final contig N50 of 20.59 Mb and  
252 scaffold N50 of 25.8 Mb, with a GC content of 42.39% (Supplementary Table S2 and S3). The  
253 structure and quality of the assembled genome were determined by mapping a Hi-C chromosomal

254 contact map.

255 The completeness of the Lion-head goose genome assembly was assessed using the BUSCO gene set.  
256 The result showed that almost 99.02% of the reads were correctly mapped to the genome. We then  
257 evaluated the assembled genome with 98.24% single-copy and 1.76% duplicated orthologs from the  
258 BUSCO dataset, confirming that 8,081 genes (96.92%) were intact in this genome. These results indicate  
259 the high reliability and integrity of the assembled genome **(Supplementary Figure S2 and Table S4).**

## 260 **Genome annotation**

261 To support the genome annotation, we conducted RNA-Seq analysis using RNA samples of blood and  
262 eight tissues (brain, pharyngeal pouch, head sarcoma, spleen, liver, chest muscle, kidney, and heart)  
263 from four **healthy adult individuals**. The aggregate of 760 Gb raw reads was accumulated by the paired-  
264 end sequencing of the 36 constructed libraries. After filtering the adaptor and low-quality sequences,  
265 723 Gb qualified Illumina reads remained, *de novo* assembled into unique transcripts (unigenes). Overall,  
266 a total of 216,229 unigenes were assembled and at the level N50, 5,082 nucleotides were obtained. Total  
267 21,208 protein-coding gene annotations were predicted in Lion-head goose by combining *de novo*  
268 prediction, homologous protein prediction, and transcription alignment. After filtering TE-related genes,  
269 a total of 21,010 protein-coding gene annotations were finally obtained by the TE seeker database (**Fig.**  
270 **2**). Furthermore, a total of 8.15% repeat sequence and 4.10% tandem repeats of the genome were  
271 detected **(Table 1). Comparative statistics of genome quality metrics with the assembled goose genome**  
272 **(including Zhedong white goose, Sichuan white goose and Tianfu goose) are shown in Table 2.**

## 273 **Phylogenetic analysis**

274 To investigate the genomic evolution of poultry, we compared the sequences of eight bird species (Lion-  
275 head goose, Zhedong white goose, duck, turkey, chicken, pigeon, saker, and titmouse) and green lizard,  
276 clustering the genes into 15,162 gene families **(Fig. 3A, Supplementary Table S5)**. Among these, 6,422  
277 single-copy gene families were identified and used to construct a phylogenetic tree (**Fig. 3B**). This  
278 revealed that the geese and ducks were clustered into a subclade that probably evolved from a common  
279 ancestor approximately 28.42 million years ago (Mya). As expected, the Lion-head goose displayed a



280 close relationship with the Zhedong white goose. The divergence time between the Lion-head goose and  
281 Zhedong white goose was estimated to be 13.79 Mya, and that between chicken and turkey was nearly  
282 25.07 Mya. The above results confirmed the reliability of the tree.

283 Of all the gene families in the Lion-head goose, 4,233 gene families were significantly expanded and  
284 324 were contracted. Compared with Zhedong white goose, the Lion-head goose had more gene families  
285 and there are also more events of gene family expansion and contraction. Moreover, we mixed the gene  
286 family sets of several *Anatidae* varieties (duck, Zhedong white goose, Lion-head goose), and performed  
287 expansion and contraction analysis and corresponding GO enrichment analysis. In this task, the GO  
288 analysis of expanded gene families suggested the olfactory perception, such as detection of chemical  
289 stimulus involved in sensory perception of smell (GO:0050911,  $p = 6.97 \times 10^{-8}$ ), and odorant-binding  
290 (GO:0005549,  $p = 1.47 \times 10^{-5}$ ), both of which may be related to the adaptation of the species to find food  
291 in water (Fig. 4A, Supplementary Table S6). Meanwhile, contracted gene families were concentrated  
292 in the areas of glucose synthesis and metabolism, such as hexokinase activity (GO:0004396,  $p =$   
293  $7.64 \times 10^{-26}$ ), glucose binding (GO:0005536,  $p = 2.30 \times 10^{-22}$ ), cellular glucose homeostasis (GO:0001678,  
294  $p = 6.84 \times 10^{-18}$ ), glycolytic process (GO:0006096,  $p = 1.75 \times 10^{-15}$ ), hexose metabolic process  
295 (GO:0019318,  $p = 2.66 \times 10^{-14}$ ), carbohydrate phosphorylation (GO:0046835,  $p = 1.68 \times 10^{-9}$ ), and glucose  
296 6-phosphate metabolic process (GO:0051156,  $p = 1.27 \times 10^{-9}$ ), which may be closely related to  
297 characteristics of glycogen storage and utilization during migration (Fig. 4B, Supplementary Table  
298 S7). Besides, 220 unique gene families (other species lack these gene families) of the Lion-head goose  
299 were identified and functionally annotated in GO categories, such as protein kinase activity  
300 (GO:0004672,  $p = 6.85 \times 10^{-9}$ ), the regulation of apoptotic process (GO:0042981,  $p = 5.78 \times 10^{-34}$ ), the  
301 adenylate cyclase-modulating G protein-coupled receptor signaling pathway (GO:0007188,  $p =$   
302  $5.92 \times 10^{-3}$ ), and fatty-acyl-CoA reductase (alcohol-forming) activity (GO:0080019,  $p = 8.94 \times 10^{-5}$ , Fig.  
303 4C, Supplementary Table S8). Interestingly, we annotated a reproduction-related protein in the species-  
304 specific gene family, *Sterile* (Pfam ID: PF03015), acting on fatty-acyl-CoA reductase (alcohol-forming)  
305 activity, which may be related to the low reproductive rate caused by congenital infertility in geese.

306 Collinearity analysis allows one to judge molecular evolutionary events between species and explain

307 the structural differences between the two genomes. We identified synteny blocks among avian genomes  
308 and found high collinearity between our assembly and the duck genome (genome size =1.19 Gb). Here,  
309 multiple chromosomes (Chr 1-5, 10, 12, 15, 17-20, 23, 26, 27, 29, 30, 32, 34, 36, 37, 39) of Lion-head  
310 goose were almost one-to-one collinear with those of the duck, but some chromosomal rearrangements  
311 occurred (Fig. 3C, Supplementary Figure S3). For example, on some chromosomes like Chr 1, 2, 3,  
312 and 4 of the duck genome, genes break and rearrange on the Lion-head goose genome, resulting in  
313 sequential inversion. In addition, some scaffolds such as Chr 9, 24, 25, 31, 35, 38 and 40, were not  
314 correlated with any chromosome of the duck genome maybe due to the different sources of genes on the  
315 chromosome. These results indicate that chromosome inversion and interchromosomal recombination  
316 may have occurred specifically in Lion-head goose during the evolutionary process, but this requires  
317 further investigation and verification. Moreover, Chr 4 of Lion-head goose was found to correspond to  
318 the sex chromosome Z of duck, except for the inversions of small patches of segments; therefore, we  
319 inferred that Chr 4 was the sex chromosome of the Lion-head goose. This information will be  
320 fundamental for comparative genomic studies in *Anatidae* animals.

### 321 **Cluster analysis of different goose species population**

322 Blood samples were collected from 514 geese (including Lion-head goose, Wuzong goose, Huangzong  
323 goose and Magang goose), and their weight was recorded, with the Lion-head goose using the minimum  
324 weight, the Wuzong goose using the maximum weight, and the Huangzong goose and Magang goose  
325 using the average weight. That is, the Lion-head goose weighed at least 9 kg, the Wuzong goose weighed  
326 at most 2.5 kg, the Huangzong goose weighed about 3-4 kg, and the Magang goose weighed 4.8-5.5 kg  
327 (Table 6). Blood from each sample was used for paired-end 100 resequencing. And the average raw data  
328 was 1,520.60 Mb, the average sequencing depth was 12.05×, the average coverage was 7.56%, the  
329 average matching rate was 91.31%, and 44,858 SNP loci were retained for subsequent analysis after  
330 screening SNPs with minimum allele frequency <5%, Hardy-Weinberg equilibrium test significance  
331 threshold of  $10^{-7}$ , and maximum deletion rate threshold of 0.7. We reconstructed the goose population  
332 structure using SNP data, revealing four distinct subpopulations. The PCA results demonstrated that the  
333 Lion-head Goose population was clearly distinguishable from the Magang Goose, Wuzong Goose and

334 Huangzong Goose, and there was a clear differentiation within the species (**Fig. 5A**). The clustering of  
335 Magang Goose and Huangzong Goose was closer together, probably related to their closer geographical  
336 location and the existence of some genetic exchange. The phylogenetic tree results were consistent with  
337 the PCA results. The clustering of Magang Goose and Huangzong Goose was closer to each other, and  
338 they clustered into one branch with Wuzong Goose (**Fig. 5B**).

### 339 **Candidate genomic regions for body weight based on combined analyses of GWAS and selective-** 340 **sweep**

341 **The Lion-head Goose, Huangzong Goose, Magang Goose, and Wuzong Goose are all local species**  
342 **in Guangdong, but they differ greatly in body weight. In this study, we sought to reveal genomic changes**  
343 **associated with body weight in the four goose species and screen genomic regions and genes. Selective**  
344 **sweep analysis was performed based on the  $F_{ST}$  index, considering the top 5% window as candidate**  
345 **regions. And 979 selective regions containing 818 genes were detected.**

346 **We then combined the GWAS results with the detected selective features to screen for candidate**  
347 **genomic regions responsible for the differences in goose weight.** From the Manhattan plot (**Fig. 5C**), a  
348 total of 10 significant signals were found to be associated with body weight trait in geese at the genome-  
349 wide level, including one significant SNP detected on Chr 2, 8, 9, and 33 respectively ( $-\log(p) > 7.30$ ),  
350 and six significant SNPs annotated by two genes on Chr 22, with the closest Manhattan plot SNP peak  
351 on Chr 9 for the gene *OR* (Olfactory receptor). Six significant SNPs on Chr 22 are located between  
352 1,992,485 and 1,992,520 bp, a region that spans only a physical distance of 35 bp but contains six SNP  
353 loci, making it necessary to analyze these SNPs in this small region in detail to determine whether  
354 multiple QTL are involved. The most significant SNP in this region could explain about 8.19% of the  
355 phenotypic variation. Apart from significant SNPs, potentially significant QTLs were detected on many  
356 chromosomes (including Chr 2, 3, 6, 7, 10, 11, 15, 16, 20, 28, 30, 32, 36), with a total of 25 implied  
357 significant SNPs ( $4.90 < -\log(p) < 7.30$ ). On Chr 30, the suggestively significant SNPs were located  
358 between 1,258,517 and 2,422,666 bp, spanning approximately 1.16 Mb, with the most significant SNPs  
359 in this region explaining approximately 6.12% of the phenotypic variation (**Table 4**). In the present study,  
360 we identified genes in the region near the significant SNPs, annotating a total of 21 genes. These genes

361 may be important in mediating growth and development, and we **inference** that the *LDLRAD4* gene may  
362 play a key role in developmental plasticity in geese, while the *GPR180* gene may regulate the locomotor  
363 behavior of geese to make them stronger (**Fig. 6**). **GWAS peaks overlapped with genomic regions with**  
364 **selective features on some chromosomes (Supplementary Data)**. This suggests that the region carrying  
365 **QTL are not only associated with body weight in GWAS, but are also under selection during**  
366 **domestication.**

## 367 **Discussion**

368 Despite the importance of the genus *Anser*, an economically important animal, the relative scarcity of  
369 genomic resources has largely hindered progress in studying genome evolution and molecular breeding  
370 in the major animals. High-quality chromosome-level genomes can provide key resources for studying.  
371 This study describes a chromosome-scale assembly of Lion-head goose obtained by a combination of  
372 data from the Illumina, SMRT, BioNano, and Hi-C platforms. The genome assembly is 1.19 Gb in length,  
373 and more than 97.27% of the assembled genome is anchored on 40 **pseudo-chromosomes**. The BUSCO  
374 assessment revealed 99.02% complete genes in the assembled genome, making it a better-continuity and  
375 higher-quality genome assembly than **the recently published Tianfu goose genome with a contig N50 of**  
376 **1.85 Mb and scaffold N50 of 33.12 Mb** [37]. Compared with the cultivated breed Tianfu goose, Lion-  
377 head goose, a traditional native breed, should occupy a more prominent position in the germplasm  
378 resources, and its evolving message can provide a reference for other local breeds which is worthy of  
379 in-depth study.

380 **Comparative genomics is the analysis of the structural characteristics of multiple individual genomes**  
381 **of a species or genomes of multiple species to find out the similarities and differences of gene sequences**  
382 **of species with the help of bioinformatics, and then to study the gene family analysis, analyze the**  
383 **differentiation and evolution of species, to provide a basis for elucidating species evolution. In this study,**  
384 **the evolutionary events of the Lion-head goose were analyzed by comparing the genome sequences with**  
385 **those of other birds. The results showed that the Lion-head goose and Zhedong White goose were most**  
386 **closely related, diverging at about 13.8 Mya, while the geese and ducks diverged at 28.4 Mya. The**

387 results were similar to those of Zhedong White goose, Sichuan White goose and Tianfu goose, indicating  
388 the accuracy of the assembly result of this study. Comparative genomic analysis revealed the genetic  
389 basis of interesting characters, which helped elucidate important biological implications and obtain  
390 solutions for genomic evolution between Lion-head geese and other species of *Anatidae* family,  
391 facilitating future genetic breeding programs. This is the first chromosomal level reference genome of  
392 Lion-head goose, providing important genomic data for the study of the family *Anatidae*.

393 The genomic information of the species population was obtained by whole-genome resequencing,  
394 and a large amount of variation information was obtained by comparison with the reference genome.  
395 Based on the correlation between differences in variation information and phenotypic differences of  
396 individuals, the adaptation of species to the environment, scanning of variant loci associated with  
397 important traits at the genome level, and localization of genetic mutations were discussed. Lion head  
398 goose, Magang goose, Huangzong goose and Wuzong goose are the main breeds of geese in Guangdong  
399 Province. Although they all belong to Guangdong Province, the body weight of adult geese varies greatly,  
400 and the molecular mechanism causing the huge difference is still unclear. In this study, four goose  
401 species were resequenced and examined for variation. Principal component analysis and phylogenetic  
402 tree analysis revealed significant differences among several goose species, indicating the feasibility of  
403 this study. Subsequently, GWAS was used to identify the candidate functional SNPs that might cause  
404 the weight difference of the four goose species, and the genes such as *LDLRAD4*, *GPR180*, and *OR*  
405 were analyzed and annotated, attributed to play an important role in mediating growth and development.  
406 Recently, there have been several studies related to agricultural traits that have achieved success in  
407 animal GWAS projects, for example, GWAS for improving reproductive performance and egg quality  
408 in geese and *TMEM161A* gene for embryo development [38]. Genome-wide association analysis of the  
409 early-lactation milk fat content in 3,513 Fleckvieh bulls and 2327 Holstein bulls detected 6 associated  
410 QTL regions, two of which were located near the gene *DGAT1* [39]. GWAS was conducted on 225  
411 ducks with different-sized black spots, and the results showed that *EDNRB2* was the gene  
412 responsible for the variation in duck body surface spot size [40]. In this study, *LDLRAD4* (low-

413 density lipoprotein receptor class A domain containing 4), *OR* (Olfactory receptor), and  
414 *GPR180* (G protein-coupled receptor 180) were mainly found to function in body weight traits.  
415 Knockdown of *LDLRAD4* enhances transforming growth factor (TGF)- $\beta$ -induced cell migration, which  
416 in turn regulates cell growth, differentiation, motility, apoptosis and matrix protein production [41]. The  
417 olfactory receptor (*OR2AT4*) has been shown to stimulate the proliferation of keratin-forming cells in  
418 peripheral human tissues [42]. *GPR180*, a component of the TGF- $\beta$  signaling pathway, also has  
419 metabolic relevance in the body and may play an essential role in regulating adipose tissue and systemic  
420 energy metabolism [43]. Here we found some correlation between these genes and the TGF- $\beta$  signaling,  
421 presumably this pathway also acts on body weight. Identifying of molecular genetic markers and the  
422 main effect QTL associated with critical agricultural traits is of great interest to breeders. Nevertheless,  
423 the candidate genes identified in this study were only detected by sequencing data and not  
424 experimentally validated. The functions of these candidate SNPs and gene markers need to be further  
425 verified by experimental results or other techniques. Thus, the findings in our GWAS study represent a  
426 valuable resource for geese and provide a new opportunity and basis for geneticists and breeders to work  
427 together to explore the genetics behind various agricultural traits.

## 428 **Conclusions**

429 In summary, we have obtained a high-quality chromosome-scale draft assembly of a purebred Lion-  
430 head goose, which provides a genetic basis for understanding the acquisition of related traits and  
431 facilitates advances in goose genomics and genetic improvement. Moreover, the candidate genes and  
432 their variants identified in this study will help clarify our understanding of goose selective breeding and  
433 the development of new breeds. The obtained genome sequence of Lion-head goose is a vital addition  
434 to the genome of genus *Anser* and is valuable for further understanding goose molecular breeding  
435 strategies. This genomic resource is also of high value for evolutionary studies of closely related species.

## 436 **Data Availability**

437 The final genome assembly data supporting the results of this article is available in the NCBI BioProject  
438 repository, [Accession number: PRJNA736831]. **The RNA assembly data is available in the NCBI**

439 **BioProject repository, [Accession number: PRJNA807796].** The raw re-sequencing genome data  
440 supporting of the GWAS study is available in the NCBI BioProject repository [Accession number:  
441 PRJNA552198, PRJNA552383, and PRJNA552384].

## 442 **Additional Files**

443 **Supplementary Figure S1. Sequencing process and presentation.**

444 Supplementary **Figure S2.** BUSCO assessment of the assembly genome of Lion-head goose.

445 Supplementary **Figure S3.** Gene synteny between the Lion-head goose and duck genomes.

446 Supplementary Table S1. Statistics of sequenced clean data.

447 Supplementary Table S2. Statistics of genome survey.

448 Supplementary Table S3. **Statistics of genome assembly quality.**

449 **Supplementary Table S4. Summary of BUSCOs genome evaluation.**

450 **Supplementary Table S5: Summary of gene families from several species.**

451 Supplementary Table **S6.** GO annotation of expanded gene families from Anatidae varieties (Duck,  
452 Zhedong white goose, Lion-head goose; Top 20).

453 Supplementary Table **S7.** GO annotation of contraction gene families from Anatidae varieties (Duck,  
454 Zhedong white goose, Lion-head goose; Top 20).

455 Supplementary Table **S8.** GO annotation of unique gene families from the Lion-head goose.

456 **Supplementary Data. Significant information of selective-sweep analysis.**

## 457 **Abbreviations**

458 BLAST: Basic Local Alignment Search Tool; BWA: Burrows-Wheeler Aligner; BUSCO:  
459 Benchmarking Universal Single-Copy Orthologs; Chr: chromosome; GATK4: Genome Analysis Toolkit  
460 4; Gb: gigabase pairs; GO: gene ontology; GPR180: G protein-coupled receptor 180; GWAS: genome-  
461 wide association study; HERA: Highly Efficient Repeat Assembly; Hi-C: high-throughput chromosome  
462 conformation capture; Kb: kilobase pairs; kg: kilogram; LDLRAD4: low-density lipoprotein receptor  
463 class A domain containing 4; LTR: long terminal repeat; Mb: megabase pairs; Mya: million years ago;  
464 NCBI: National Center for Biotechnology Information; OR: Olfactory receptor; OR2AT4: olfactory

465 receptor family 2 subfamily AT member 4; PacBio: Pacific Biosciences; PCA: Principal component  
466 analysis; QTL: quantitative trait locus; RAxML: Randomized Axelerated Maximum Likelihood; RNA-  
467 seq: RNA sequencing; SMRT: single molecule real-time; SNP: single-nucleotide polymorphism; STAR:  
468 Spliced Transcripts Alignment to a Reference; TE: transposable element; TGF: transforming growth  
469 factor; TMEM161A: Transmembrane protein 161A.

## 470 **Competing Interests**

471 The authors declare that they have no conflict of interest.

## 472 **Funding**

473 This work was supported by the Key Research and Development Program of Guangdong Province  
474 (2020B020222001), the Construction of Modern Agricultural Science and Technology Innovation  
475 Alliance in Guangdong Province (2021KJ128, 2020KJ128), the National Modern Agricultural Industry  
476 Science and Technology Innovation Center in Guangzhou (2018kczx01), the Guangdong Provincial  
477 Promotion Project on Preservation and Utilization of Local Breed of Livestock and Poultry (4000-  
478 F18260), the Guangdong Basic and Applied Basic Research Foundation (2019A1515012006). The  
479 authors would like to thank the BGI in Shenzhen for their work on genome sequencing. We also thank  
480 the staff of Minglead Gene for providing the technical and computing support during the research.

## 481 **Author's Contributions**

482 Q.X., Z.L., and X.Z. conceived and designed the research. X.Z., J.C., and Q.Z. coordinated the project.  
483 J.C. and Z.L. provided animal samples. Q.Z. and Z. X. collected and prepared the samples. Q.Z.  
484 performed sequencing, assembly and bioinformatics analysis. W.L., and F.C. led work identifying  
485 genes, and H.L., W.C. aided with many aspects of gene identification and did the GO analyses. Q.Z.,  
486 X.Z. wrote and revised the manuscript and the supplementary information. J.W., M.J., Z.H., H.Z.,  
487 Z.L., and Q.X. participated in discussions and provided valuable advice. All authors read and approved  
488 the manuscript.

## 489 **References**

- 490 1. Hoyo JD, Elliott A, Sargatal J, et al. Handbook of the birds of the world. Barcelona: Lynx Edicions; 1992.
- 491 2. Madsen J, Marcussen LK, Knudsen N, et al. Does intensive goose grazing affect breeding waders? *Ecol Evol*  
492 2019;**9**(24):14512-14522. doi:10.1002/ece3.5923.
- 493 3. Wang Y, Li SM, Huang J, et al. Mutations of TYR and MITF Genes are Associated with Plumage Colour  
494 Phenotypes in Geese. *Asian-Australas J Anim Sci* 2014;**27**(6):778-83. doi:10.5713/ajas.2013.13350.
- 495 4. Gao G, Zhao X, Li Q, et al. Genome and metagenome analyses reveal adaptive evolution of the host and  
496 interaction with the gut microbiota in the goose. *Sci Rep* 2016;**6**:32961. doi:10.1038/srep32961.
- 497 5. Yao Y, Yang YZ, Gu TT, et al. Comparison of the broody behavior characteristics of different breeds of geese.  
498 *Poult Sci* 2019;**98**(11):5226-5233. doi:10.3382/ps/pez366.



- 499 6. Lu L, Chen Y, Wang Z, et al. The goose genome sequence leads to insights into the evolution of waterfowl  
500 and susceptibility to fatty liver. *Genome Biol* 2015;**16**:89. doi:10.1186/s13059-015-0652-y.
- 501 7. Li HF, Zhu WQ, Chen KW, et al. Two maternal origins of Chinese domestic goose. *Poult Sci*  
502 2011;**90**(12):2705-10. doi:10.3382/ps.2011-01425.
- 503 8. Tang J, Shen X, Ouyang H, et al. Transcriptome analysis of pituitary gland revealed candidate genes and gene  
504 networks regulating the growth and development in goose. *Anim Biotechnol* 2020:1-11.  
505 doi:10.1080/10495398.2020.1801457.
- 506 9. Zhang X, Wang J, Li X, et al. Transcriptomic investigation of embryonic pectoral muscle reveals increased  
507 myogenic processes in Shitou geese compared to Wuzong geese. *Br Poult Sci* 2021;**62**(5):650-657.  
508 doi:10.1080/00071668.2021.1912292.
- 509 10. Ardui S, Ameer A, Vermeesch JR, et al. Single molecule real-time (SMRT) sequencing comes of age:  
510 applications and utilities for medical diagnostics. *Nucleic Acids Res* 2018;**46**(5):2159-2168.  
511 doi:10.1093/nar/gky066.
- 512 11. Yoshinaga Y, Daum C, He G, et al. Genome Sequencing. *Methods Mol Biol* 2018;**1775**:37-52.  
513 doi:10.1007/978-1-4939-7804-5\_4.
- 514 12. Kong S, Zhang Y. Deciphering Hi-C: from 3D genome to function. *Cell Biol Toxicol* 2019;**35**(1):15-32.  
515 doi:10.1007/s10565-018-09456-2.
- 516 13. Nakano K, Shiroma A, Shimoji M, et al. Advantages of genome sequencing by long-read sequencer using  
517 SMRT technology in medical area. *Hum Cell* 2017;**30**(3):149-161. doi:10.1007/s13577-017-0168-8.
- 518 14. Jain M, Olsen HE, Turner DJ, et al. Linear assembly of a human centromere on the Y chromosome. *Nat*  
519 *Biotechnol* 2018;**36**(4):321-323. doi:10.1038/nbt.4109.
- 520 15. Sun L, Gao T, Wang F, et al. Chromosome-level genome assembly of a cyprinid fish *Onychostoma macrolepis*  
521 by integration of nanopore sequencing, Bionano and Hi-C technology. *Mol Ecol Resour* 2020;**20**(5):1361-  
522 1371. doi:10.1111/1755-0998.13190.
- 523 16. Bocklandt S, Hastie A, Cao H. Bionano Genome Mapping: High-Throughput, Ultra-Long Molecule Genome  
524 Analysis System for Precision Genome Assembly and Haploid-Resolved Structural Variation Discovery. *Adv*  
525 *Exp Med Biol* 2019;**1129**:97-118. doi:10.1007/978-981-13-6037-4\_7.
- 526 17. Koren S, Walenz BP, Berlin K, et al. Canu: scalable and accurate long-read assembly via adaptive k-mer  
527 weighting and repeat separation. *Genome Res* 2017;**27**(5):722-736. doi:10.1101/gr.215087.116.
- 528 18. Du H, Liang C. Assembly of chromosome-scale contigs by efficiently resolving repetitive sequences with long  
529 reads. *Nat Commun* 2019;**10**(1):5360. doi:10.1038/s41467-019-13355-3.
- 530 19. Li H, Durbin R. Fast and accurate short read alignment with Burrows-Wheeler transform. *Bioinformatics*  
531 2009;**25**(14):1754-60. doi:10.1093/bioinformatics/btp324.
- 532 20. Li H, Handsaker B, Wysoker A, et al. The Sequence Alignment/Map format and SAMtools. *Bioinformatics*  
533 2009;**25**(16):2078-9. doi:10.1093/bioinformatics/btp352.
- 534 21. Walker BJ, Abeel T, Shea T, et al. Pilon: an integrated tool for comprehensive microbial variant detection and  
535 genome assembly improvement. *Plos One* 2014;**9**(11):e112963. doi:10.1371/journal.pone.0112963.
- 536 22. Durand NC, Shamim MS, Machol I, et al. Juicer Provides a One-Click System for Analyzing Loop-Resolution  
537 Hi-C Experiments. *Cell Syst* 2016;**3**(1):95-8. doi:10.1016/j.cels.2016.07.002.
- 538 23. Dudchenko O, Batra SS, Omer AD, et al. De novo assembly of the *Aedes aegypti* genome using Hi-C yields  
539 chromosome-length scaffolds. *Science* 2017;**356**(6333):92-95. doi:10.1126/science.aal3327.
- 540 24. Servant N, Varoquaux N, Lajoie BR, et al. HiC-Pro: an optimized and flexible pipeline for Hi-C data processing.  
541 *Genome Biol* 2015;**16**(1). doi:10.1186/s13059-015-0831-x.
- 542 25. Bolger AM, Lohse M, Usadel B. Trimmomatic: a flexible trimmer for Illumina sequence data. *Bioinformatics*  
543 2014;**30**(15):2114-20. doi:10.1093/bioinformatics/btu170.
- 544 26. Grabherr MG, Haas BJ, Yassour M, et al. Full-length transcriptome assembly from RNA-Seq data without a  
545 reference genome. *Nat Biotechnol* 2011;**29**(7):644-52. doi:10.1038/nbt.1883.
- 546 27. Huang Y, Niu B, Gao Y, et al. CD-HIT Suite: a web server for clustering and comparing biological sequences.  
547 *Bioinformatics* 2010;**26**(5):680-2. doi:10.1093/bioinformatics/btq003.
- 548 28. Dobin A, Davis CA, Schlesinger F, et al. STAR: ultrafast universal RNA-seq aligner. *Bioinformatics*  
549 2013;**29**(1):15-21. doi:10.1093/bioinformatics/bts635.
- 550 29. Seppy M, Manni M, Zdobnov EM. BUSCO: Assessing Genome Assembly and Annotation Completeness.  
551 *Methods Mol Biol* 2019;**1962**:227-245. doi:10.1007/978-1-4939-9173-0\_14.
- 552 30. Lu L, Chen Y, Wang Z, et al. The goose genome sequence leads to insights into the evolution of waterfowl  
553 and susceptibility to fatty liver. *Genome Biol* 2015;**16**:89. doi:10.1186/s13059-015-0652-y.
- 554 31. Benson G. Tandem repeats finder: a program to analyze DNA sequences. *Nucleic Acids Res* 1999;**27**(2):573-  
555 80. doi:10.1093/nar/27.2.573.
- 556 32. Wang Y, Tang H, Debarry JD, et al. MCLScanX: a toolkit for detection and evolutionary analysis of gene

557 synteny and collinearity. *Nucleic Acids Res* 2012;**40**(7):e49. doi:10.1093/nar/gkr1293.

558 33. Stamatakis A. RAxML version 8: a tool for phylogenetic analysis and post-analysis of large phylogenies.

559 *Bioinformatics* 2014;**30**(9):1312-3. doi:10.1093/bioinformatics/btu033.

560 34. Sanderson MJ. r8s: inferring absolute rates of molecular evolution and divergence times in the absence of a

561 molecular clock. *Bioinformatics* 2003;**19**(2):301-2. doi:10.1093/bioinformatics/19.2.301.

562 35. Han MV, Thomas GW, Lugo-Martinez J, et al. Estimating gene gain and loss rates in the presence of error in

563 genome assembly and annotation using CAFE 3. *Mol Biol Evol* 2013;**30**(8):1987-97.

564 doi:10.1093/molbev/mst100.

565 36. Yu G, Wang LG, Han Y, et al. clusterProfiler: an R package for comparing biological themes among gene

566 clusters. *Omics* 2012;**16**(5):284-7. doi:10.1089/omi.2011.0118.

567 37. Li Y, Gao G, Lin Y, et al. Pacific Biosciences assembly with Hi-C mapping generates an improved,

568 chromosome-level goose genome. *Gigascience* 2020;**9**(10). doi:10.1093/gigascience/giaa114.

569 38. Gao G, Gao D, Zhao X, et al. Genome-Wide Association Study-Based Identification of SNPs and Haplotypes

570 Associated With Goose Reproductive Performance and Egg Quality. *Front Genet* 2021;**12**:602583.

571 doi:10.3389/fgene.2021.602583.

572 39. Daetwyler HD, Capitan A, Pausch H, et al. Whole-genome sequencing of 234 bulls facilitates mapping of

573 monogenic and complex traits in cattle. *Nat Genet* 2014;**46**(8):858-65. doi:10.1038/ng.3034.

574 40. Xi Y, Xu Q, Huang Q, et al. Genome-wide association analysis reveals that EDNRB2 causes a dose-dependent

575 loss of pigmentation in ducks. *Bmc Genomics* 2021;**22**(1):381. doi:10.1186/s12864-021-07719-7.

576 41. Nakano N, Maeyama K, Sakata N, et al. C18 ORF1, a novel negative regulator of transforming growth factor-

577 beta signaling. *J Biol Chem* 2014;**289**(18):12680-92. doi:10.1074/jbc.M114.558981.

578 42. Cheret J, Bertolini M, Ponce L, et al. Olfactory receptor OR2AT4 regulates human hair growth. *Nat Commun*

579 2018;**9**(1):3624. doi:10.1038/s41467-018-05973-0.

580 43. Balazova L, Balaz M, Horvath C, et al. GPR180 is a component of TGFbeta signalling that promotes

581 thermogenic adipocyte function and mediates the metabolic effects of the adipocyte-secreted factor CTHRC1.

582 *Nat Commun* 2021;**12**(1):7144. doi:10.1038/s41467-021-27442-x.

583

584 **Figure legends**

585

586 **Figure 1. A picture of a male adult Lion-head goose.**

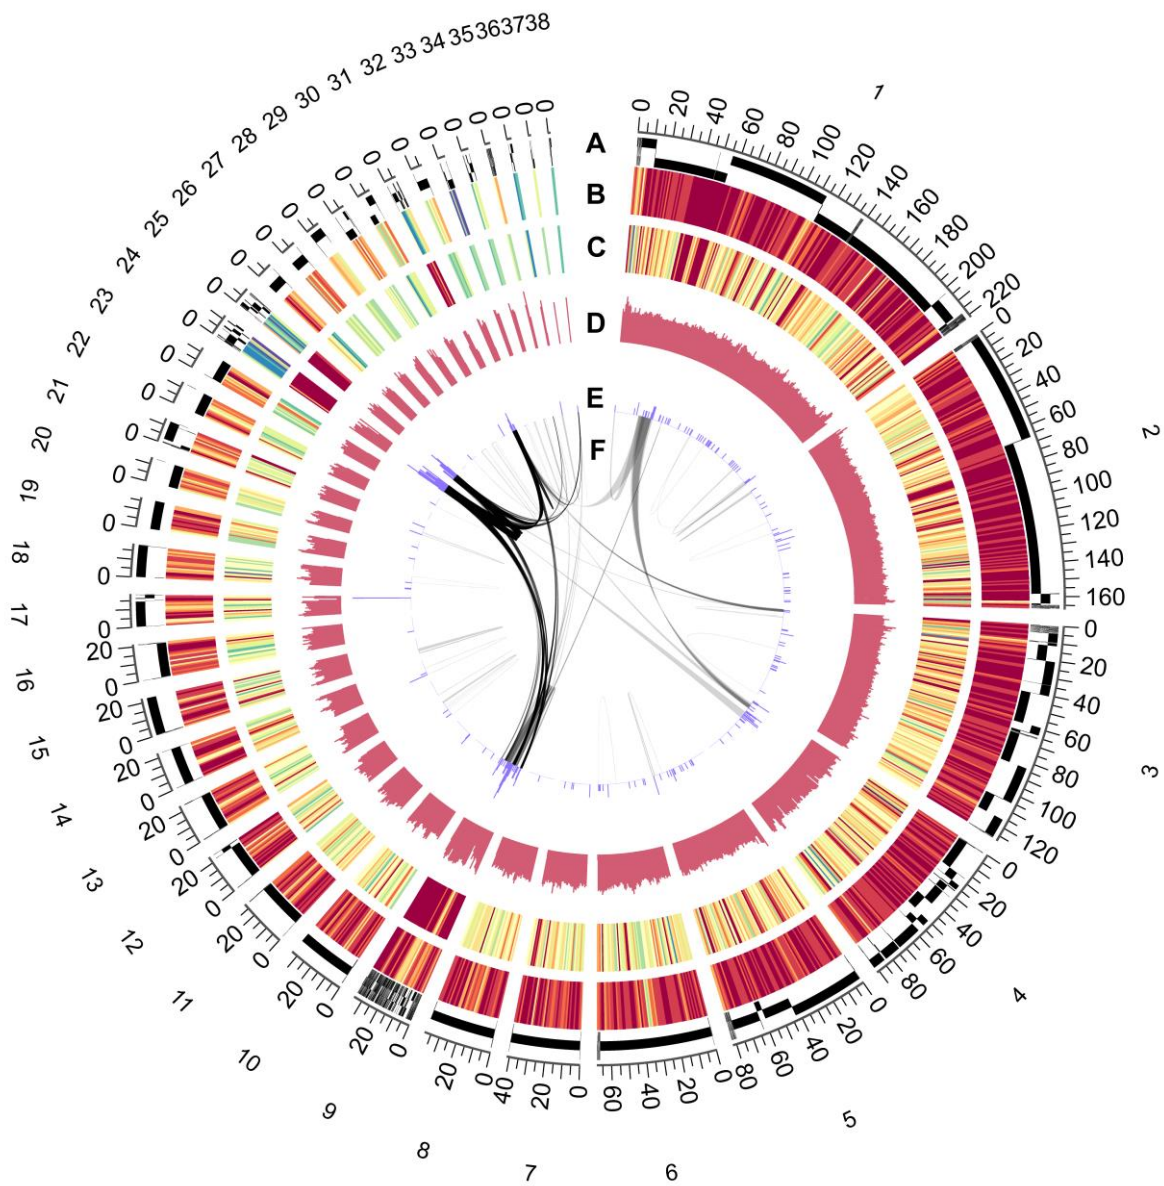

588

589 **Figure 2. Distribution of genomic features.** Concentric circle diagram presents the distribution of  
 590 genomic features of Lion-head goose using nonoverlapping sliding windows with sizes of 1 Mb (from  
 591 outmost to innermost). (A) the assembled pseudo-chromosome and the corresponding position; (B) gene  
 592 density calculated on the basis of the number of genes; (C) average expression level of overall 36  
 593 samples. eight tissues (i.e., brain, pharyngeal pouch, head sarcoma, spleen, liver, chest muscle, kidney  
 594 and heart) and blood collected from four healthy adult animals; (D) GC content; (E) density of TE; (F)  
 595 gene synteny and collinearity analysis.

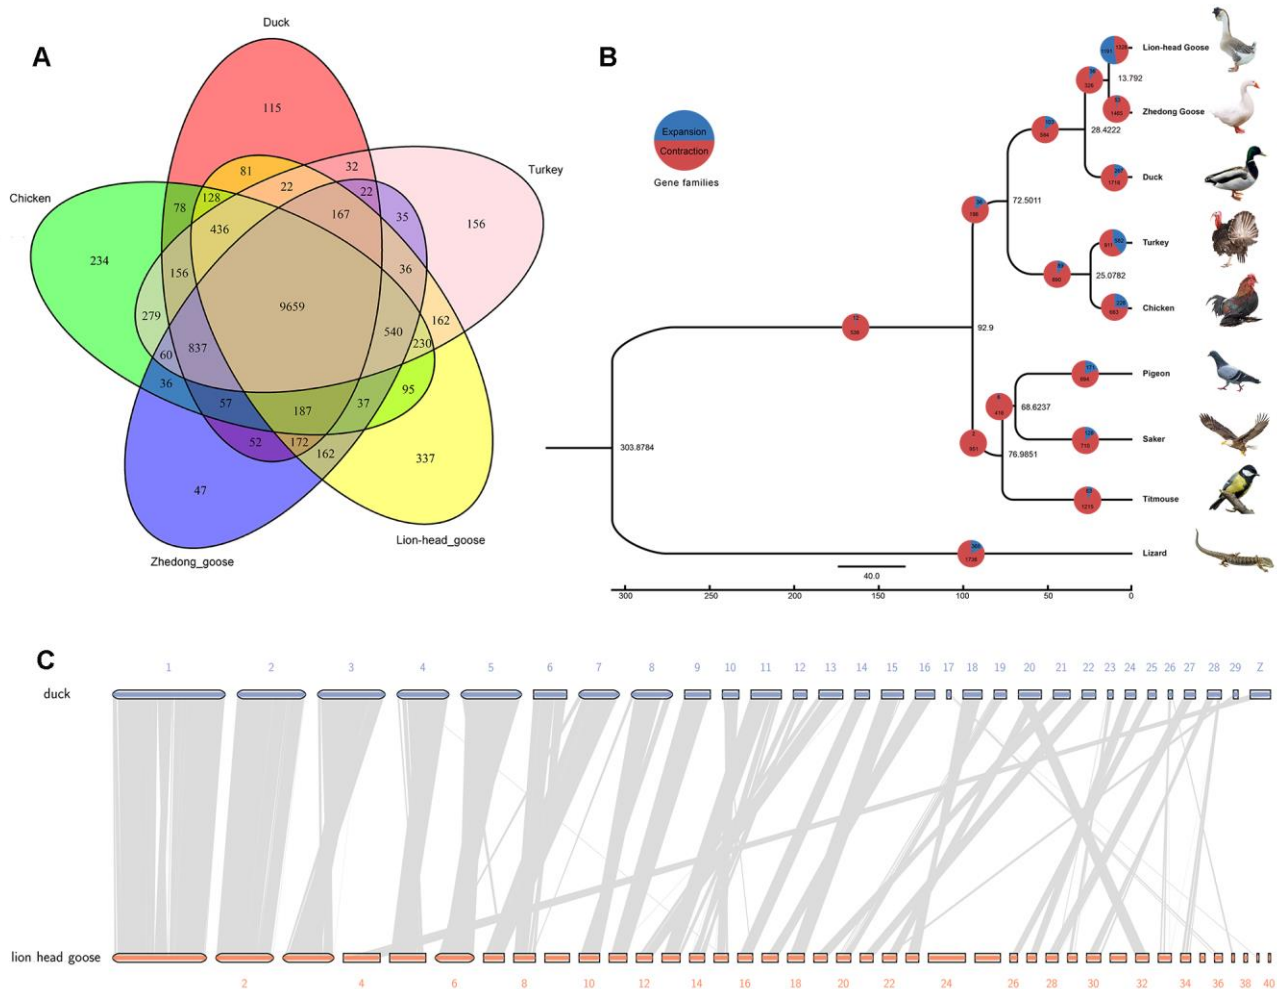

596

597 **Figure 3. Phylogenetic relationship and comparative genomics analyses.** (A) Venn diagram showing  
 598 the orthologous gene families shared among the genomes of Lion-head goose, Zhedong white goose,  
 599 chicken, duck, and turkey. (B) Phylogenetic tree with the divergence times and history of orthologous  
 600 gene families. Numbers on the nodes represent divergence times. The numbers of gene families that  
 601 expanded (green) or contracted (red) in each lineage after speciation are shown on the circles of the  
 602 corresponding branch. (C) Gene comparison of homologous chromosomes between Lion-head goose  
 603 and duck. Gray lines indicate collinearity between the genomes.

A

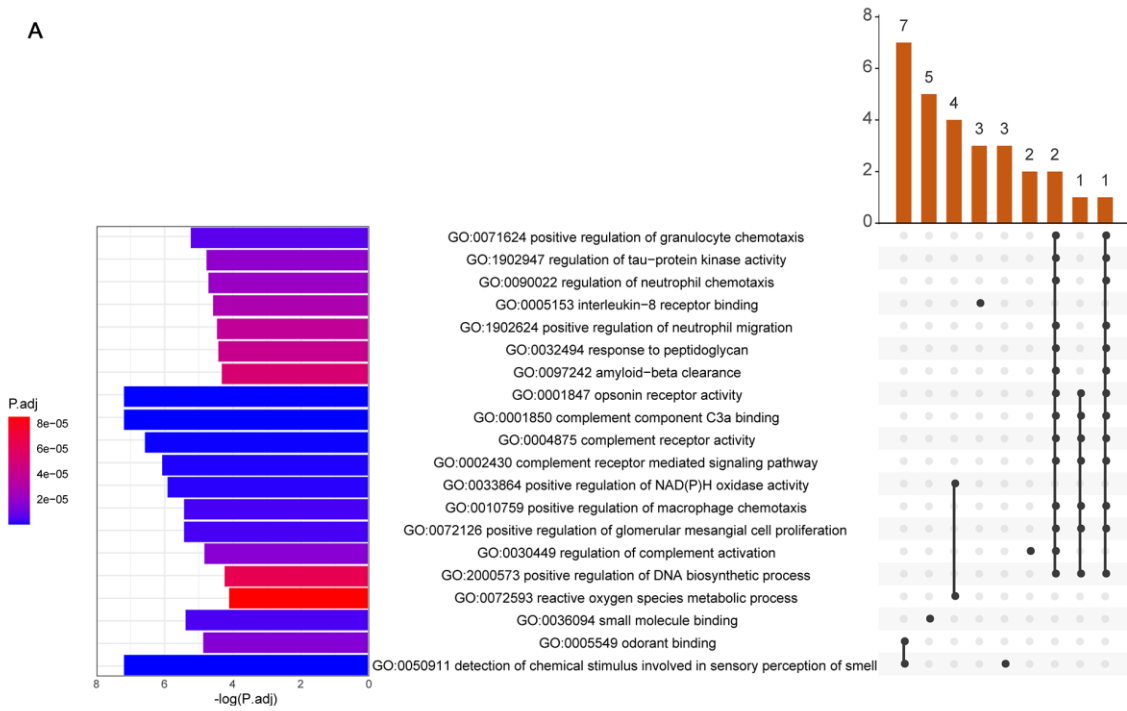

B

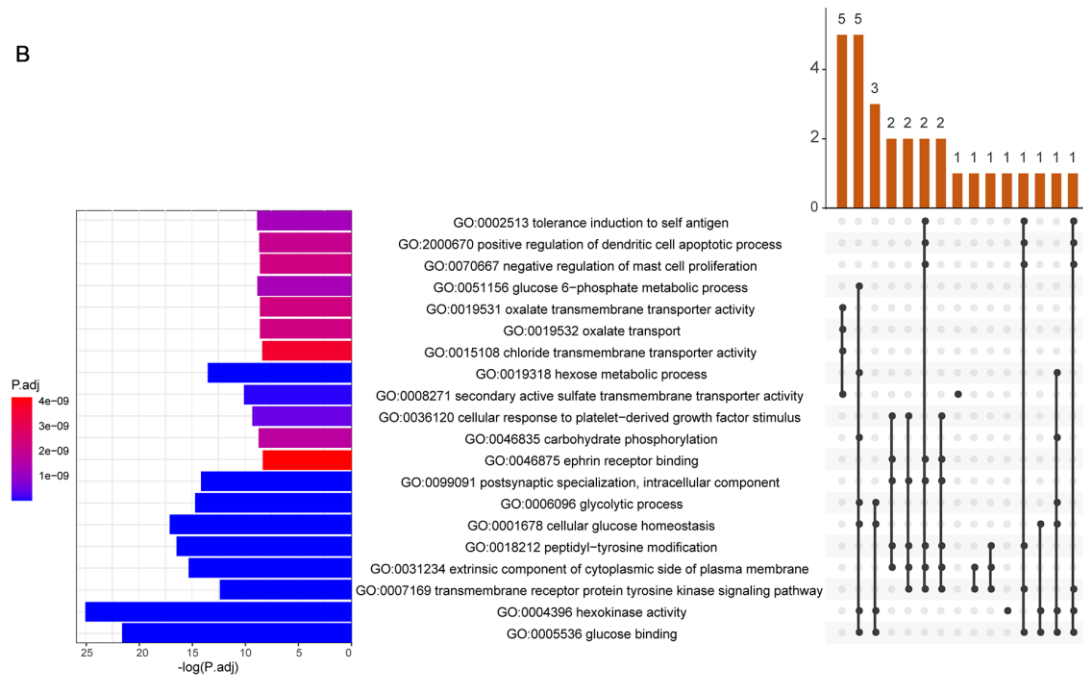

C

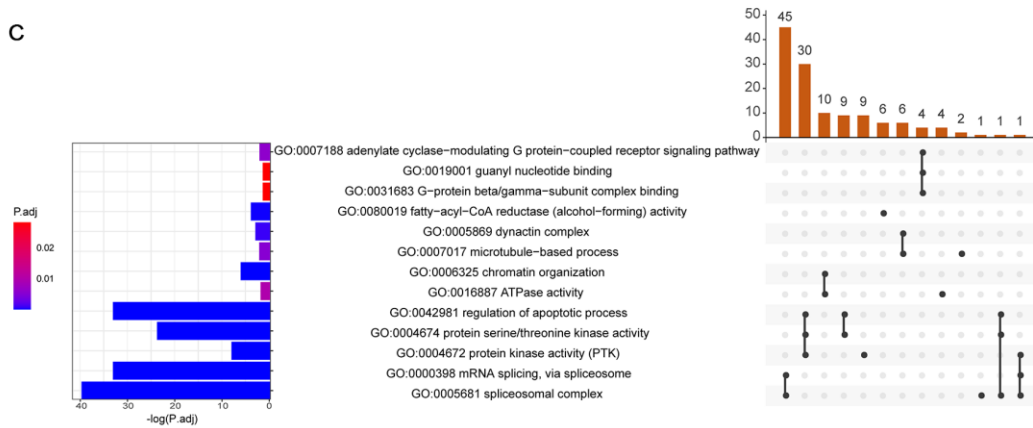

605 **Figure 4. GO enrichment analysis of gene families.** (A) Expanded and (B) contracted gene families  
606 from Anatidae varieties (duck, Zhedong white goose, Lion-head goose). (C) Unique gene families from  
607 the Lion-head goose. The bar graph on the left represents the P-adjust gradient of GO terms, and the  
608 color corresponds to the number on the x-axis (i.e.  $-\log(P.\text{adj})$ ). The bluer the color is, the smaller the  
609 P-adjust is, and the more significant it is. The redder the color is, the larger the P-adjust is, and the less  
610 significant it is. The upper right bar chart exhibits that several genes act together on the terms below.  
611 The lower right chart displays the intersection of the genes of each term; the dots connected by lines  
612 represent the intersection of multiple terms; the black dots represent “yes”, and the gray dots represent  
613 “no”.

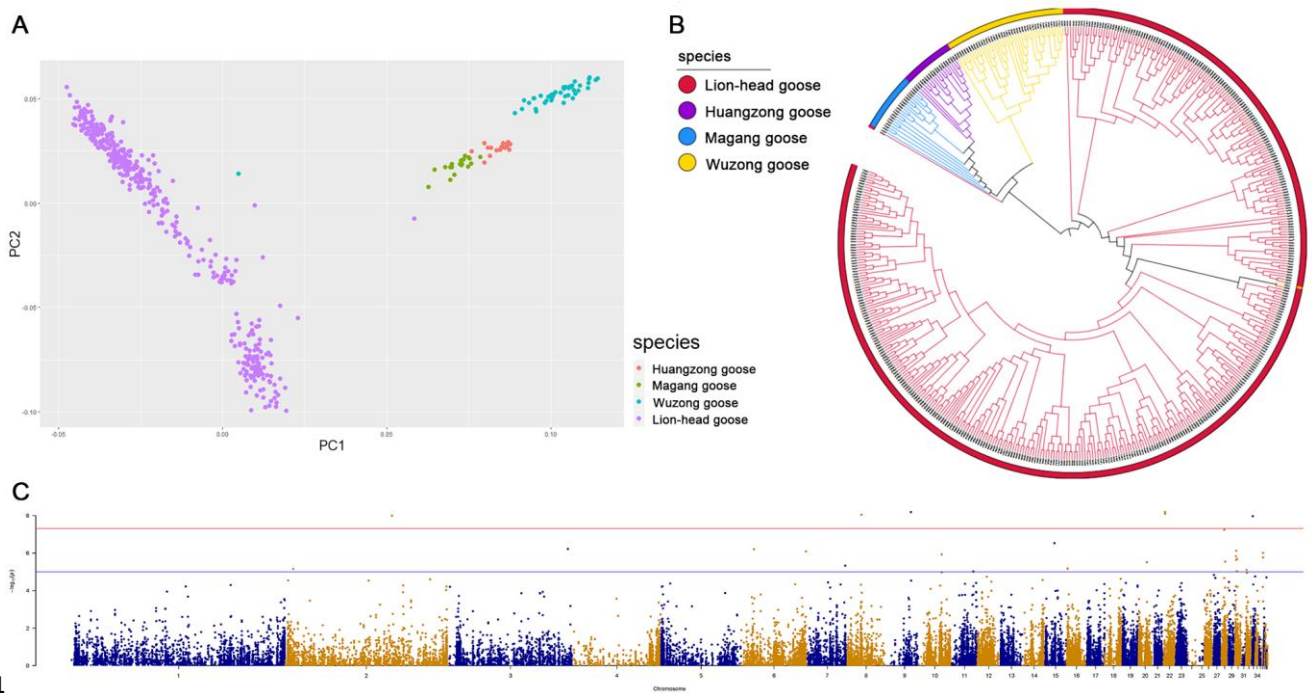

614

615 **Figure 5. Comparison of different goose species and genome-wide association analysis of body**

616 **weight. (A)** Principal component analysis of sample structures using first two principal components. **(B)**

617 The phylogenetic trees of several goose species. **(C)** Manhattan plot of genome-wide association

618 analysis for body weight. The X-axis indicates chromosomes, and Y-axis indicates the P values of the

619 SNP markers. The red solid line indicates the threshold P value for genome-wide significance. The blue

620 solid line indicates the threshold P value for the significance of potential association.



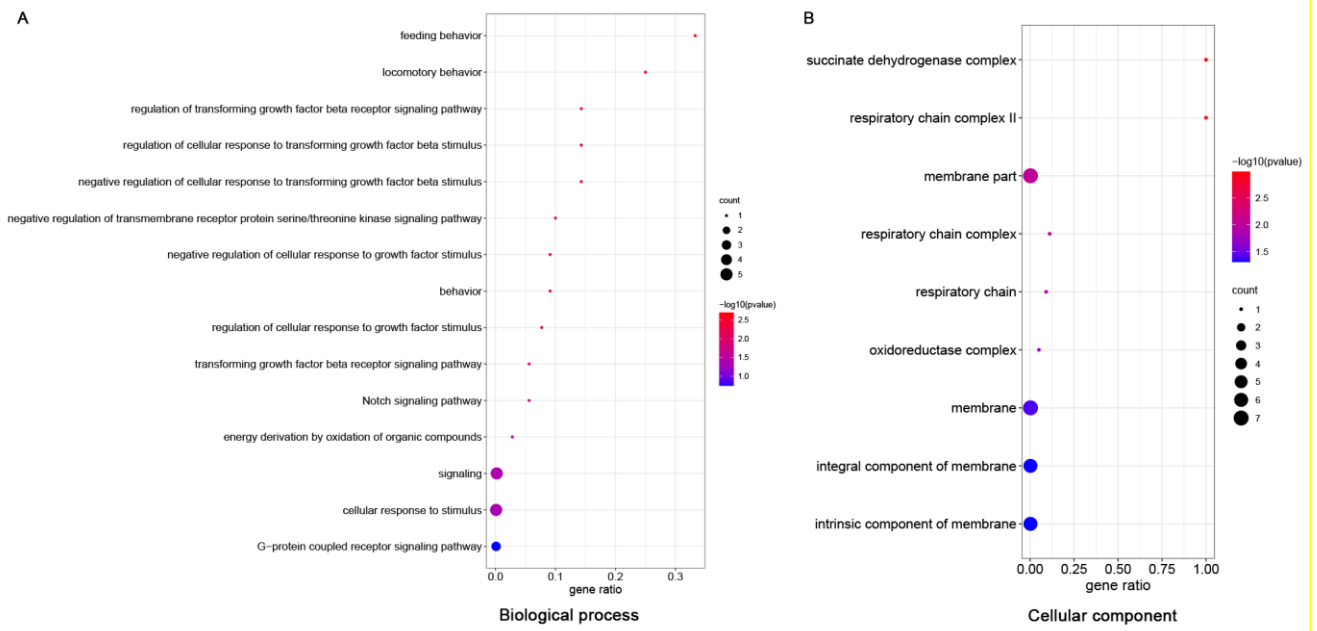

621

622 **Figure 6. GO analysis of body weight-related genes:(A) Biological processes level, (B) Cellular**

623 **component level.**

**Table 1:** Summary of repeat classification.

| Type                              | Length      | Percent |
|-----------------------------------|-------------|---------|
| Long interspersed nuclear element | 76,437,757  | 5.98    |
| Simple sequence repeats           | 23,026,311  | 1.80    |
| Low complexity                    | 4,663,288   | 0.36    |
| Tandem repeats                    | 52,426,380  | 4.10    |
| Total                             | 156,553,736 | 12.25   |

624

**Table 2:** Comparison of the present study with previous quality metrics of goose genome assembly.

| Genomic features                      | Lion-head goose | Zhedong white goose | Sichuan white goose | Tianfu goose  |
|---------------------------------------|-----------------|---------------------|---------------------|---------------|
| Estimate of genome size (bp)          | 1,278,045,811   | 1,208,661,181       | 1,198,802,839       | 1,277,099,016 |
| Total length of contigs (bp)          | 1,268,074,106   | 1,086,838,604       | 1,100,859,441       | 1,113,842,245 |
| Total length of scaffolds (bp)        | 1,277,289,474   | 1,122,178,121       | 1,130,663,797       | 1,113,913,845 |
| Number of contigs                     | 1,318           | 60,979              | 53,336              | 2,771         |
| Number of scaffolds                   | 1,266           | 1,050               | 1,837               | 2,055         |
| Contig N50 (bp)                       | 21,589,146      | 27,602              | 35,032              | 1,849,874     |
| Scaffold N50 (bp)                     | 27,064,542      | 5,202,740           | 5,103,766           | 33,116,532    |
| Longest contig (bp)                   | 91,420,268      | 201,281             | 399,111             | 10,766,871    |
| Longest scaffold (bp)                 | 98,160,899      | 24,051,356          | 20,207,557          | 70,896,740    |
| GC content                            | 42.39%          | 38.00%              | 41.68%              | 42.15%        |
| No. of predicted protein-coding genes | 21,010          | 16,150              | 16,288              | 17,568        |
| Percentage of repeat sequences        | 12.25%          | 6.33%               | 6.90%               | 8.67%         |

625

**Table 3:** Descriptive statistical of body weight traits.

| Species         | Number | Max (Kg) | Min (Kg) | Mean±SEM   |
|-----------------|--------|----------|----------|------------|
| Lion-head goose | 416    | 15.70    | 9.00     | 13.55±1.97 |
| Magang goose    | 20     | 5.50     | 4.80     | 5.32±0.36  |
| Huangzong goose | 20     | 4.30     | 2.70     | 3.40±0.83  |
| Wuzong goose    | 44     | 2.50     | 1.80     | 2.24±0.25  |

626

**Table 4:** Genome-wide association analysis of body weight in geese.

| Chr | Allele | Physical position | Regression coefficient | P value  | Genes      |
|-----|--------|-------------------|------------------------|----------|------------|
| 2   | A      | 108496954         | -0.1886                | 1.01E-08 | LDLRAD4    |
| 2   | G      | 7706165           | 0.2612                 | 6.98E-06 | LDLRAD4    |
| 3   | T      | 123032780         | -0.3979                | 6.03E-07 | EGF, KBTBD |
| 6   | A      | 13264157          | -0.24                  | 6.28E-07 | TSPAN      |
| 6   | T      | 66027192          | 0.2127                 | 8.14E-07 | IGFN1      |
| 7   | T      | 39117443          | -0.3131                | 4.66E-06 | —          |
| 8   | T      | 14712470          | 0.1865                 | 8.97E-09 | PPEF1      |
| 9   | T      | 26883582          | -2.7E+12               | 0        | OR         |
| 10  | C      | 23997415          | -0.3032                | 1.19E-06 | —          |
| 10  | C      | 23997399          | -0.2542                | 1.05E-05 | —          |

|    |   |          |         |          |                |
|----|---|----------|---------|----------|----------------|
| 10 | T | 23997401 | -0.2542 | 1.05E-05 | —              |
| 11 | A | 22838749 | 0.1548  | 9.55E-06 | —              |
| 15 | T | 10257386 | 0.2527  | 2.96E-07 | GPR180, GPCPD1 |
| 16 | A | 1477673  | -0.1892 | 6.53E-06 | —              |
| 16 | G | 1477679  | -0.1891 | 6.78E-06 | —              |
| 20 | A | 8531879  | 0.151   | 3.05E-06 | —              |
| 22 | A | 1992485  | -0.3972 | 6.51E-09 | GALNT, AUTS2   |
| 22 | A | 1992518  | -0.3973 | 7.69E-09 | GALNT, AUTS2   |
| 22 | G | 1992501  | -0.3974 | 7.94E-09 | GALNT, AUTS2   |
| 22 | C | 1992505  | -0.3974 | 7.94E-09 | GALNT, AUTS2   |
| 22 | C | 1992507  | -0.3974 | 7.94E-09 | GALNT, AUTS2   |
| 22 | G | 1992515  | -0.3974 | 7.94E-09 | GALNT, AUTS2   |
| 28 | C | 3587271  | 0.2936  | 5.81E-08 | PPP1R15B, FGD2 |
| 28 | G | 4472051  | -0.2359 | 2.82E-06 | PPP1R15B, FGD2 |
| 30 | C | 1652158  | -0.3469 | 7.53E-07 | SH2            |
| 30 | T | 1258517  | 0.2205  | 1.48E-06 | SH2            |
| 30 | G | 2422665  | 0.1894  | 2.04E-06 | SH2            |
| 30 | T | 2422666  | 0.1894  | 2.04E-06 | SH2            |
| 30 | A | 1652207  | -0.3289 | 2.3E-06  | SH2            |
| 30 | T | 2269897  | 0.211   | 9.22E-06 | SH2            |
| 32 | G | 655318   | 0.2599  | 7.95E-06 | —              |
| 33 | A | 975487   | 0.2567  | 1.07E-08 | SDHA           |
| 36 | A | 1523127  | -0.3274 | 9.86E-07 | SPRY           |
| 36 | G | 1523132  | -0.3216 | 1.7E-06  | SPRY           |
| 36 | C | 1523105  | -0.3291 | 1.72E-06 | SPRY           |

# 1 **Chromosome-level genome assembly of goose provides insight into** 2 **the adaptation and growth of local goose breeds**

3 **Qiqi Zhao<sup>1,3,5</sup>, Junpeng Chen<sup>2</sup>, Zi Xie<sup>1,3,5</sup>, Jun Wang<sup>4</sup>, Keyu Feng<sup>1,3,5</sup>, Wencheng Lin<sup>1,3,5</sup>, Hongxin**  
4 **Li<sup>1,3,5</sup>, Zezhong Hu<sup>1</sup>, Weiguo Chen<sup>1,3,5</sup>, Feng Chen<sup>1,3</sup>, Muhammad Junaid<sup>4</sup>, Huanmin Zhang<sup>6</sup>,**  
5 **Zhenping Lin<sup>2\*</sup>, Qingmei Xie<sup>1,3,5\*</sup>, Xinheng Zhang<sup>1,3,5\*</sup>**

6 <sup>1</sup>Heyuan Branch, Guangdong Provincial Laboratory of Lingnan Modern Agricultural Science and  
7 technology & Guangdong Provincial Key Lab of Agro-Animal Genomics and Molecular Breeding,  
8 College of Animal Science, South China Agricultural University, Guangzhou, Guangdong 510642,  
9 China; <sup>2</sup>Shantou Baisha Research Institute of Original Species of Poultry and Stock, Shantou,  
10 Guangdong 515000, China; <sup>3</sup>Department of Science and Technology of Guangdong Province, Key  
11 Laboratory of Animal Health Aquaculture and Environmental Control, Guangzhou, Guangdong 510642,  
12 China; <sup>4</sup>College of Marine Sciences, South China Agricultural University, Guangzhou, Guangdong,  
13 510642, China; <sup>5</sup>Guangdong Engineering Research Center for Vector Vaccine of Animal Virus,  
14 Guangzhou, 510642, China and <sup>6</sup>Avian Disease and Oncology Laboratory, Agriculture Research Service,  
15 United States Department of Agriculture, East Lansing, MI, 48823, USA

16 \* Correspondence address:

17 Zhenping Lin, Shantou Baisha Research Institute of Original Species of Poultry and Stock, Shantou,  
18 China. E-mail: Linzp02@163.com; Qingmei Xie and Xinheng Zhang, College of Animal Science, South  
19 China Agricultural University, Guangzhou, China. E-mails: qmx@scau.edu.cn (Q.X.);  
20 xhzhang@scau.edu.cn (X.Z.)

21 **running title:** Goose chromosome-level Genome Assembly

22 **Abstract**

23 **Background:** *Anatidae* contains numerous waterfowl species with great economic value, but the  
24 genetic diversity basis remains insufficiently investigated. Here, we report a chromosome-level genome  
25 assembly of Lion-head goose (*Anser cygnoides*), a native breed in South China, through the combination  
26 of PacBio, Bionano and Hi-C technologies. **Findings:** The assembly had a total genome size of 1.19 Gb,  
27 consisting of 1,859 contigs with an N50 length of 20.59 Mb, generating 40 pseudochromosomes,  
28 representing 97.27% of the assembled genome, and identifying 21,208 protein-coding genes.  
29 Comparative genomic analysis revealed that geese and ducks diverged approximately 28.42 million  
30 years ago, and geese have undergone massive gene family expansion and contraction. To identify genetic  
31 markers associated with body weight in different geese breeds including Wuzong goose, Huangzong  
32 goose, Magang goose and Lion-head goose, a genome-wide association study was performed, yielding  
33 an average of 1,520.6 Mb of raw data with detecting 44,858 SNPs. GWAS showed that six SNPs were  
34 significantly associated with body weight and 25 were potentially associated. The significantly  
35 associated SNPs were annotated as *LDLRAD4*, *GPR180*, *OR*, enriching in growth factor receptors  
36 regulation pathways. **Conclusions:** We present the first chromosome-level assembly of the Lion-head  
37 goose genome, which will expand the genomic resources of the *Anatidae* family, providing a basis for  
38 adaptation and evolution. Candidate genes significantly associated with different goose breeds may  
39 serve to understand the underlying mechanisms of weight differences.

40 **Keywords:** Lion-head goose, Genome assembly, Comparative genome, Genome-wide association study

41

## 42 Introduction

43 The *Anatidae* is a family of the ancient *Aves* class with order *Anseriformes*, containing 43 genera  
44 and 174 species, including most birds of *Anseriformes*, such as ducks, geese, swans, and is the most  
45 prominent family of swimming birds [1]. Physical characteristics and features vary significantly among  
46 species, making the *Anatidae* family rich in diversity and specificity. *Anatidae* adults are usually  
47 herbivores, feeding on a variety of aquatic plants, which are well suited to sustainable production  
48 practices thereby reducing competition for human food; and some species are even used for crop weeds  
49 and pests control [1, 2]. For a long time, duck and goose feathers have been popular in pillows, quilts  
50 and coats [3]. Several species in the genus *Anser* are commercially important and domesticated as  
51 poultry because of their meat-producing performance and the warmth properties of feather products.  
52 According to archaeological evidence, geese were domesticated around 6,000 years ago near the  
53 Mediterranean Sea, and later spread around the world due to human activities [4]. It is widely believed  
54 that *Anser cygnoides* is the ancestor of the Chinese goose (*Anser cygnoides domesticus*) with a  
55 domestication history of more than 3,000 years [1]. After artificial domestication, the domestic goose  
56 has increased its cold tolerance and roughage-resistance, but its wings are degraded and weakened in  
57 flight, unable to travel long distances [1]. Egg-laying rate and goslings survival rate are also improved  
58 compared to wild swans, and the lifespan is longer [5]. Furthermore, overfeeding can cause foie gras to  
59 be at least three-fold larger than the normal size while the goose remains healthy, making the goose a  
60 good model to study human liver steatosis [6]. Chinese domestic geese is a natural gene pool containing  
61 local breeds of diverse phenotypes, and adult domestic geese from similar region vary greatly in weight  
62 [7]. For example, the Lion-head goose in Shantou (116°14'-117°19' E, 23°02'-23°38' N), Guangdong  
63 Province, can weigh more than 9 kg, while in the Wuzong goose from Qingyuan (111°55'-113°55' E,  
64 23°31'-25°12' N), Guangdong Province, the average weight is only about 3 kg [8, 9]. The Lion-head  
65 goose has a large body, a deep and wide head, and large sarcomas (five sarcomas) on the front and side  
66 of the face (Fig. 1). The adult male goose weighs 9-10 kg and the female goose 7.5-9 kg, grows rapidly  
67 and has rich muscles. Wuzong goose is a small goose species with a distinct band of black plumage from

68 neck to back. The gander weighs 3-3.5kg and the female weighs 2.5-3kg, with wide and short body, flat  
69 back, and thin and short feet. Magang goose is a medium-sized goose species, with a long head, wide  
70 beak, rectangular body, a gray-black bristle-like feathers on the back of the neck, gray brown breast  
71 feathers and white belly feathers. Adult weight is 4-5 kg for males and 3-4 kg for females. Huangzong  
72 goose has a compact body, from the top of the head to the back of the neck has a brownish yellow feather  
73 belt, shaped like a horse's mane. The chest feather is gray yellow, the belly feather is white, the beak and  
74 sarcoma is black. Adult males weigh 3-3.5 kg, females 2.5-3 kg. However, the mechanisms for such  
75 differences have not been clarified, let alone being resolved at the genomic level. Therefore, a complete,  
76 continuous and accurate reference genome is essential, for deciphering genomic diversity, evolutionary  
77 and adaptive processes, improving production efficiency and even promoting the development of goose  
78 industry.

79 High-quality genome assembly sequences enable us to comprehensively and scientifically decode  
80 the genetic diversity of species, explore disease mechanisms, and understand species evolution. Recently,  
81 Pacbio has offered technology that can generate reads several thousand bases in size, and these long  
82 reads can span repetitive regions [10]. Although these long reads have a high error rate, they can be  
83 integrated with Illumina's short reads to improve sequencing accuracy [11]. In addition, new scaffolding  
84 techniques, such as high-throughput chromosome conformation capture (Hi-C), allow the genome to be  
85 assembled to the level of whole chromosomes [12]. Pacbio single molecule real-time (SMRT)  
86 sequencing technology has been extensively used in the study of human diseases such as tuberculosis  
87 and influenza virus [13], as well as in the study of species evolution, such as the centromere of the  
88 human Y chromosome [14]. Bionano optical mapping technology has advantages in obtaining highly  
89 repetitive sequences and detecting genomic structural variants, which is helpful for remote sequencing  
90 of sequence overlap clusters[15]. Bionano has become a powerful tool for genome assembly, a 5.1 Mbp  
91 inversion was found in the genomes of a patient with Duchenne muscular dystrophy[16].

92 In this study, we report the genome assembly at the chromosome level in Lion-head geese for the  
93 first time using combined data generated by four advanced technologies, Illumina, SMRT, Bionano, and  
94 Hi-C. In addition, we investigated the relationship between body weight and genetic variations in Lion-

95 head goose, Wuzong goose, Huangzong goose and Magang goose by genome-wide association analysis,  
96 trying to identify the genes involved in body weight determination from different species. These will  
97 offer valuable resources for facilitating genetic research and the improvement of the species and for  
98 studying speciation and evolution in geese.

## 99 **Methods**

### 100 **Animal selection**

101 An adult healthy purebred male Lion-head goose (*Anser cygnoides*) with classical traits was selected for  
102 whole-genome sequencing and conducting *de novo* assembly from Shantou Baisha Research Institute  
103 of Original Species of Poultry and Stock. Blood and eight tissues (i.e., brain, pharyngeal pouch, head  
104 sarcoma, spleen, liver, chest muscle, kidney, and heart) from another four **healthy adult individuals** were  
105 collected for RNA-seq analysis. All applicable institutional and national guidelines for the care and use  
106 of animals were followed. All the animal work in this study was approved by the South China  
107 Agricultural University Committee for Animal Experiments (approval ID: SYXK 2019-0136). All the  
108 research procedures and animal care activities were conducted based on the principles stated in the  
109 National and Institutional Guide for the Care and Use of Laboratory Animals.

### 110 **Genome survey library construction and sequencing**

111 To survey the genome profile, high-quality genomic DNA was extracted from the blood of the reference  
112 individual for whole-genome sequencing using the Qiagen Blood and Cell Culture DNA Midi Kit  
113 according to the manufacturer's instructions. For the quality control of purity, concentration, and  
114 integrity, we used Qubit 2.0 Fluorometry (Life Technologies, USA), NanoDrop 2000 spectrophotometer  
115 (Thermo Scientific), and pulse-field gel electrophoresis (Bio-rad CHEF-DR II), respectively. The  
116 following steps used for DNA extraction and quality control were similar. The short paired-end Illumina  
117 DNA library was constructed using the Illumina HiSeq system (with the paired-end 350 bp sequencing  
118 strategy). After performing the sequencing and obtaining the data, the k-mer analysis of reads for the  
119 genome survey was calculated by the Jellyfish program with the default parameters. Additionally, the  
120 genome size, heterozygosity ratio, and repeat sequence ratio were calculated with the GenomeScope



121 tool based on the k-mer frequency of 17.

## 122 **Genome sequencing and assembly strategies**

123 A 40 kb *de novo* library for SMRT genome sequencing was constructed using the PacBio Sequel III  
124 platform (Pacific Biosciences, USA). All of these reads were used for contigs assembly. A scalable and  
125 accurate long-read assembly tool, Canu (v1.8) [17], was employed to correct and assemble the PacBio  
126 reads with the listed parameters (minThreads = 4, genome size = 1200m, minOverlapLength = 700,  
127 minReadLength = 1000). The resulting contigs and corrected reads were used as inputs for HERA [18]  
128 to fill the gaps and produce longer contigs with default parameters. After that, Illumina paired-end clean  
129 data were mapped to the corrected contigs with the Burrows-Wheeler Aligner (BWA) [19], and the  
130 results were filtered by Q30 with Samtools (v1.8) [20]. At last, Pilon (v1.22) [21] was used to polish the  
131 assembly and enhance the base accuracy of the contigs.

132 Physical optical genome maps from BioNano were used to improve the assembly quality of the  
133 genome, with the ultimate goal of generating a chromosome-scale assembly. Nuclear DNA was  
134 extracted from the blood sample of the reference individual and digested with nickase Direct Labeling  
135 Enzyme I. After labeling, repairing and staining reactions, DNA was loaded onto the Saphyr Chip for  
136 sequencing to generate BioNano molecules. Afterward, the data were assembled with RefAligner and  
137 Assembler of BioNano Solve. The scaffold was established using BioNano Solve with HERA's contigs  
138 and a BioNano genome map. When encountering a conflict between a contig and the genome map, the  
139 contig was split to correct the false connection.

140 For Hi-C library, fresh blood was vacuum-infiltrated with 2% formaldehyde solution and then used  
141 for cross-link action. Later nuclear DNA was isolated from the reference animal and digested with the  
142 restriction enzyme Mbo I. The Hi-C library with insertion sizes of 350 bp was constructed and sequenced  
143 on the Illumina HiSeq X Ten instrument. The Hi-C reads were assigned to the scaffolds by Juicer [22].  
144 The scaffolds were further clustered, ordered, and oriented to the chromosome-level scaffolds by 3D-  
145 DNA [23]. Thus, a heatmap of Hi-C chromosomal interaction was created using the HiC-pro software  
146 [24].

## 147 **RNA-Seq and transcripts assembly**

148 RNA-seq was conducted on blood and eight different tissues (i.e., brain, pharyngeal pouch, head  
149 sarcoma, spleen, liver, chest muscle, kidney, and heart) from four **healthy adult Lion-head goose**. Total  
150 RNA was extracted from four individuals using the TRIZOL reagent and purified following the  
151 manufacturer's protocols. The concentration and quality of the isolated RNA were assessed using the  
152 Nanodrop Spectrophotometer, Qubit 2.0 Fluorometry, and the Agilent 2100 bioanalyzer (Agilent  
153 Technologies, USA). Libraries construction and sequencing were performed using the Illumina  
154 NovaSeq 6000 platform. Raw RNA-seq data with 150 bp paired-end reads were trimmed for quality  
155 using Trimmomatic [25]. Thus, the Illumina sequence adaptors were removed, then **low-quality reads**  
156 **based on Phred scores and polluted reads containing N > 5% were trimmed, using the following**  
157 **parameters: LEADING:3 TRAILING:3 SLIDINGWINDOW:4:15 -threads 20 MINLEN:50.**  
158 **Furthermore, Trinity [26] was used** to *de novo* assemble the data after quality filtering. To remove  
159 redundant sequences, CD-HIT [27] was employed to remove highly identical transcript isoforms,  
160 retaining only the longest one. After filtering, the RNA-seq reads were mapped to the assembled genome  
161 using the default parameters of STAR [28].

## 162 **Assembly evaluation**

163 Finishing the genome assembly, quality control for the assembly's quality, accuracy, and integrity was  
164 predicted by Benchmarking Universal Single-Copy Orthologs (BUSCO, v 3.0), using *aves\_odb10* as  
165 the query [29].

## 166 **Genome annotation**

167 The genome assembly was annotated by MAKER, mainly including gene annotation and repeat  
168 annotation. The detailed pipeline was based on proteins from the Uniprot, the *de novo* assembly of RNA-  
169 seq data, and the total proteins of the relative species *Anser cygnoides* [30]. The transposable elements  
170 (TE) associated genes that were filtered out by the TEseeker database, and the results were used to  
171 conduct functional annotation using InterProScan. The repeat sequencing library was identified and  
172 annotated by a combination of LTR-FINDER and RepeatModeler. RepeatMasker and the query species  
173 "Chicken" were used to mask the repeats in the assembly, based on the Repbase database and the  
174 previous repeat sequence library. Tandem repeats were discovered by the Tandem Repeats Finder [31].

## 175 **Gene families and phylogenetic analysis**

176 Interspecific syntenic blocks between the Lion-head goose and duck were explored using MCscan [32]  
177 after coding sequence alignment by BLASTn. The same method was used for intraspecific collinearity  
178 analysis. To gain insight into the gene family evolution of the goose, we compared the gene families of  
179 Lion-head goose with the genomes of the following avian species: Zhedong white goose (*Anser*  
180 *cygnoides*), duck (*Anas platyrhynchos*), turkey (*Meleagris gallopavo*), chicken (*Gallus gallus*), pigeon  
181 (*Columba livia*), saker (*Falco cherrug*), titmouse (*Pseudopodoces humilis*), and green lizard (*Anolis*  
182 *carolinensis*). Initially, alternative splicing and genes encoding less than 50 amino acids with a  
183 proportion of stop codon greater than 20% were filtered; meanwhile, the longest transcript of genes with  
184 multiple isoforms was retained to represent the gene. Similarity relationships among the protein  
185 sequences of species were aligned by BLASTP algorithm and clustered using OrthoMCL methodology  
186 with an expansion coefficient of 1.5 to obtain single- and multiple-copy gene families, and specific gene  
187 families of Lion-head goose. The sequences of the single-copy gene families were employed to perform  
188 multiple alignments by MUSCLE. Then RAxML [33] was used to construct a phylogenetic tree of nine  
189 species, with the green lizard (*Anolis carolinensis*) being designated an outgroup. Taking the divergence  
190 time of the pigeon and turkey (92.9Mya, <http://www.timetree.org/>) as the calibration, the r8s [34]  
191 software was used to estimate the divergence time of the species and construct ultrametric trees. After  
192 filtering out gene families with gene counts of more than 100 in some individual species, CAFÉ [35]  
193 was employed to detect gene families that had undergone expansion or contraction per million years  
194 independently along each branch of the phylogenetic tree. Subsequently, a gene ontology (GO)  
195 enrichment analysis of gene families was performed using the clusterProfiler package in R [36].

## 196 **Experimental sample processing and variant detection for Genome-wide association study**

197 Blood samples of 514 geese (including Lion-head goose, Wuzong goose, Huangzong goose and Magang  
198 goose) were collected and stored in 2 mL tubes containing ACD anticoagulant for DNA extraction, and  
199 the weight of the geese was recorded. DNA was extracted from blood samples using the HiPure Blood  
200 DNA Mini Kit (Magenbio, Guangzhou, China). The samples that passed the quality testing were

201 subjected to library construction using Easy DNA Library Prep Kit (MGI, Shenzhen, China) and paired-  
202 end 100 sequencing using MGISEQ 500. Raw data were filtered for adaptors and low quality reads using  
203 SOAPnuke software, low quality threshold parameters set to 5, and the filtered sequences were  
204 compared with the constructed goose reference genome using BWA software with parameters: mem, -  
205 M. Then variant detection was performed using Samtools, GATK4 software with parameters:  
206 HaplotypeCaller -ERC GVCF. SNP variants were filtered based on a minimum allele frequency  
207 threshold of 0.05, a Hardy Weinberg equilibrium test significance threshold of  $10^{-7}$ , and a max missing  
208 rate threshold of 0.7. Principal component analysis (PCA) was performed and plotted with R. To  
209 understand the kinship among the samples, the phylogenetic trees were constructed using SNP data with  
210 Phylip software.

### 211 **Genome-wide association study**

212 The genetic variation was analyzed with individual corresponding weight information using the  
213 asymptotic Wald test (assoc) in Plink. The top 20 PCs in PCA analysis were used as covariates, and  
214 linear analysis was performed on sample variances with corresponding weight information by Plink. And  
215 the common parameters in two types of model analysis is --allow-extra-chr --allow-no-sex -out, where  
216 the assoc parameter is -assoc and the linear parameter is --linear --covar plink.eigenvec. The statistical  
217 analysis model for genome-wide association analysis was as follows:

$$218 \quad P = \mu + Z\alpha + \text{SNP} + e$$

219 where P is the phenotypic variable;  $\mu$  is the intercept; Z is the random multigene effect relationship  
220 matrix;  $\alpha$  is the random multigene effect; SNP is the SNP effect; e is the residual, distributed as  $e \sim (0, I$   
221  $\sigma_e)$ , and I is the unit matrix.

222 Genome-wide 5% significance threshold was determined using the Bonferroni method. To reduce  
223 false negative, the threshold was expanded by 20-fold as a second threshold and the SNP in this region  
224 was defined as potentially associated. The SNPs with Bonferroni corrected p-values less than 0.05 in  
225 the results of the assoc and linear analyses were annotated. The corresponding genes annotated with  
226 significantly related SNPs were used to identify the GO pathway.

### 227 **Selective-sweep analysis**

228 To analyze regions affected by long-term selection and are associated with domestication of geese, we  
229 calculated the Fixation indices ( $F_{ST}$ ) for four goose species using vcftools software with sliding  
230 windows length of 20 kb that had a 10-kb overlap between adjacent windows. The top 5% of regions  
231 were designated as candidate selective regions and the genes in these regions were considered as  
232 candidate genes.

## 233 Results

### 234 Genome sequencing and assembly

235 The Lion-head goose is a famous local variety in China and one of the most giant goose breeds  
236 worldwide, with a unique appearance and social benefits. Here, we attempt to construct a highly  
237 continuous chromosome-scale genome of an adult purebred male Lion-head goose with a high degree  
238 of homozygosity to minimize heterozygous alleles. The following sequencing and genome assemble  
239 strategies were applied: Illumina sequencing, Pacbio SMRT sequencing, BioNano optical mapping, and  
240 Hi-C approach (Supplementary Table S1). We assemble these data step by step and generate  
241 progressively improved assembled genome (Supplementary Figure S1). A total of 185.37 Gb of high-  
242 quality Pacbio long reads were generated, representing a  $\sim 168\times$  depth of the estimated 1.05 Gb genome  
243 with heterozygosity of 0.335% based on the k-mer analysis of the Illumina sequences (Supplementary  
244 Figure S1, Supplementary Table S2). Combing the *de novo* assembly of the Illumina and Pacbio  
245 sequences resulted in a draft genome of 1.20 Gb, yielding 1,859 contigs with a length of 13.7 Mb for  
246 contig N50 and 57.6 Mb for the longest (Table 1). Furthermore, with the help of BioNano optical  
247 mapping, the scaffold N50 value was increased to 37 Mb. To obtain a chromosome-scale assembly, a  
248 set of  $\sim 230$  Gb Hi-C data was used to orient, order, phase, and anchor the contigs. Approximately 97.27%  
249 of the reads assembled were anchored to 40 high-confidence pseudo-chromosomes (39 autosomes and  
250 Z chromosome) using the high-density genetic map (Supplementary Figure S1, Fig. 2). After polishing,  
251 we finally assembled the ultimate genome into 1.19 Gb with the final contig N50 of 20.59 Mb and  
252 scaffold N50 of 25.8 Mb, with a GC content of 42.39% (Supplementary Table S2 and S3). The  
253 structure and quality of the assembled genome were determined by mapping a Hi-C chromosomal

254 contact map.

255 The completeness of the Lion-head goose genome assembly was assessed using the BUSCO gene set.  
256 The result showed that almost 99.02% of the reads were correctly mapped to the genome. We then  
257 evaluated the assembled genome with 98.24% single-copy and 1.76% duplicated orthologs from the  
258 BUSCO dataset, confirming that 8,081 genes (96.92%) were intact in this genome. These results indicate  
259 the high reliability and integrity of the assembled genome (**Supplementary Figure S2 and Table S4**).

## 260 **Genome annotation**

261 To support the genome annotation, we conducted RNA-Seq analysis using RNA samples of blood and  
262 eight tissues (brain, pharyngeal pouch, head sarcoma, spleen, liver, chest muscle, kidney, and heart)  
263 from four **healthy adult individuals**. The aggregate of 760 Gb raw reads was accumulated by the paired-  
264 end sequencing of the 36 constructed libraries. After filtering the adaptor and low-quality sequences,  
265 723 Gb qualified Illumina reads remained, *de novo* assembled into unique transcripts (unigenes). Overall,  
266 a total of 216,229 unigenes were assembled and at the level N50, 5,082 nucleotides were obtained. Total  
267 21,208 protein-coding gene annotations were predicted in Lion-head goose by combining *de novo*  
268 prediction, homologous protein prediction, and transcription alignment. After filtering TE-related genes,  
269 a total of 21,010 protein-coding gene annotations were finally obtained by the TE seeker database (**Fig.**  
270 **2**). Furthermore, a total of 8.15% repeat sequence and 4.10% tandem repeats of the genome were  
271 detected (**Table 1**). Comparative statistics of genome quality metrics with the assembled goose genome  
272 (including Zhedong white goose, Sichuan white goose and Tianfu goose) are shown in **Table 2**.

## 273 **Phylogenetic analysis**

274 To investigate the genomic evolution of poultry, we compared the sequences of eight bird species (Lion-  
275 head goose, Zhedong white goose, duck, turkey, chicken, pigeon, saker, and titmouse) and green lizard,  
276 clustering the genes into 15,162 gene families (**Fig. 3A, Supplementary Table S5**). Among these, 6,422  
277 single-copy gene families were identified and used to construct a phylogenetic tree (**Fig. 3B**). This  
278 revealed that the geese and ducks were clustered into a subclade that probably evolved from a common  
279 ancestor approximately 28.42 million years ago (Mya). As expected, the Lion-head goose displayed a

280 close relationship with the Zhedong white goose. The divergence time between the Lion-head goose and  
281 Zhedong white goose was estimated to be 13.79 Mya, and that between chicken and turkey was nearly  
282 25.07 Mya. The above results confirmed the reliability of the tree.

283 Of all the gene families in the Lion-head goose, 4,233 gene families were significantly expanded and  
284 324 were contracted. Compared with Zhedong white goose, the Lion-head goose had more gene families  
285 and there are also more events of gene family expansion and contraction. Moreover, we mixed the gene  
286 family sets of several *Anatidae* varieties (duck, Zhedong white goose, Lion-head goose), and performed  
287 expansion and contraction analysis and corresponding GO enrichment analysis. In this task, the GO  
288 analysis of expanded gene families suggested the olfactory perception, such as detection of chemical  
289 stimulus involved in sensory perception of smell (GO:0050911,  $p = 6.97 \times 10^{-8}$ ), and odorant-binding  
290 (GO:0005549,  $p = 1.47 \times 10^{-5}$ ), both of which may be related to the adaptation of the species to find food  
291 in water (Fig. 4A, Supplementary Table S6). Meanwhile, contracted gene families were concentrated  
292 in the areas of glucose synthesis and metabolism, such as hexokinase activity (GO:0004396,  $p =$   
293  $7.64 \times 10^{-26}$ ), glucose binding (GO:0005536,  $p = 2.30 \times 10^{-22}$ ), cellular glucose homeostasis (GO:0001678,  
294  $p = 6.84 \times 10^{-18}$ ), glycolytic process (GO:0006096,  $p = 1.75 \times 10^{-15}$ ), hexose metabolic process  
295 (GO:0019318,  $p = 2.66 \times 10^{-14}$ ), carbohydrate phosphorylation (GO:0046835,  $p = 1.68 \times 10^{-9}$ ), and glucose  
296 6-phosphate metabolic process (GO:0051156,  $p = 1.27 \times 10^{-9}$ ), which may be closely related to  
297 characteristics of glycogen storage and utilization during migration (Fig. 4B, Supplementary Table S7).  
298 Besides, 220 unique gene families (other species lack these gene families) of the Lion-head goose were  
299 identified and functionally annotated in GO categories, such as protein kinase activity (GO:0004672,  $p$   
300  $= 6.85 \times 10^{-9}$ ), the regulation of apoptotic process (GO:0042981,  $p = 5.78 \times 10^{-34}$ ), the adenylate cyclase-  
301 modulating G protein-coupled receptor signaling pathway (GO:0007188,  $p = 5.92 \times 10^{-3}$ ), and fatty-acyl-  
302 CoA reductase (alcohol-forming) activity (GO:0080019,  $p = 8.94 \times 10^{-5}$ , Fig. 4C, Supplementary Table  
303 S8). Interestingly, we annotated a reproduction-related protein in the species-specific gene family,  
304 *Sterile* (Pfam ID: PF03015), acting on fatty-acyl-CoA reductase (alcohol-forming) activity, which may  
305 be related to the low reproductive rate caused by congenital infertility in geese.

306 Collinearity analysis allows one to judge molecular evolutionary events between species and explain

307 the structural differences between the two genomes. We identified synteny blocks among avian genomes  
308 and found high collinearity between our assembly and the duck genome (genome size =1.19 Gb). Here,  
309 multiple chromosomes (Chr 1-5, 10, 12, 15, 17-20, 23, 26, 27, 29, 30, 32, 34, 36, 37, 39) of Lion-head  
310 goose were almost one-to-one collinear with those of the duck, but some chromosomal rearrangements  
311 occurred (Fig. 3C, Supplementary Figure S3). For example, on some chromosomes like Chr 1, 2, 3,  
312 and 4 of the duck genome, genes break and rearrange on the Lion-head goose genome, resulting in  
313 sequential inversion. In addition, some scaffolds such as Chr 9, 24, 25, 31, 35, 38 and 40, were not  
314 correlated with any chromosome of the duck genome maybe due to the different sources of genes on the  
315 chromosome. These results indicate that chromosome inversion and interchromosomal recombination  
316 may have occurred specifically in Lion-head goose during the evolutionary process, but this requires  
317 further investigation and verification. Moreover, Chr 4 of Lion-head goose was found to correspond to  
318 the sex chromosome Z of duck, except for the inversions of small patches of segments; therefore, we  
319 inferred that Chr 4 was the sex chromosome of the Lion-head goose. This information will be  
320 fundamental for comparative genomic studies in *Anatidae* animals.

### 321 **Cluster analysis of different goose species population**

322 Blood samples were collected from 514 geese (including Lion-head goose, Wuzong goose, Huangzong  
323 goose and Magang goose), and their weight was recorded, with the Lion-head goose using the minimum  
324 weight, the Wuzong goose using the maximum weight, and the Huangzong goose and Magang goose  
325 using the average weight. That is, the Lion-head goose weighed at least 9 kg, the Wuzong goose weighed  
326 at most 2.5 kg, the Huangzong goose weighed about 3-4 kg, and the Magang goose weighed 4.8-5.5 kg  
327 (Table 6). Blood from each sample was used for paired-end 100 resequencing. And the average raw data  
328 was 1,520.60 Mb, the average sequencing depth was 12.05×, the average coverage was 7.56%, the  
329 average matching rate was 91.31%, and 44,858 SNP loci were retained for subsequent analysis after  
330 screening SNPs with minimum allele frequency <5%, Hardy-Weinberg equilibrium test significance  
331 threshold of  $10^{-7}$ , and maximum deletion rate threshold of 0.7. We reconstructed the goose population  
332 structure using SNP data, revealing four distinct subpopulations. The PCA results demonstrated that the  
333 Lion-head Goose population was clearly distinguishable from the Magang Goose, Wuzong Goose and



334 Huangzong Goose, and there was a clear differentiation within the species (**Fig. 5A**). The clustering of  
335 Magang Goose and Huangzong Goose was closer together, probably related to their closer geographical  
336 location and the existence of some genetic exchange. The phylogenetic tree results were consistent with  
337 the PCA results. The clustering of Magang Goose and Huangzong Goose was closer to each other, and  
338 they clustered into one branch with Wuzong Goose (**Fig. 5B**).

### 339 **Candidate genomic regions for body weight based on combined analyses of GWAS and selective-** 340 **sweep**

341 **The Lion-head Goose, Huangzong Goose, Magang Goose, and Wuzong Goose are all local species**  
342 **in Guangdong, but they differ greatly in body weight. In this study, we sought to reveal genomic changes**  
343 **associated with body weight in the four goose species and screen genomic regions and genes. Selective**  
344 **sweep analysis was performed based on the  $F_{ST}$  index, considering the top 5% window as candidate**  
345 **regions. And 979 selective regions containing 818 genes were detected.**

346 **We then combined the GWAS results with the detected selective features to screen for candidate**  
347 **genomic regions responsible for the differences in goose weight.** From the Manhattan plot (**Fig. 5C**), a  
348 total of 10 significant signals were found to be associated with body weight trait in geese at the genome-  
349 wide level, including one significant SNP detected on Chr 2, 8, 9, and 33 respectively ( $-\log(p) > 7.30$ ),  
350 and six significant SNPs annotated by two genes on Chr 22, with the closest Manhattan plot SNP peak  
351 on Chr 9 for the gene *OR* (Olfactory receptor). Six significant SNPs on Chr 22 are located between  
352 1,992,485 and 1,992,520 bp, a region that spans only a physical distance of 35 bp but contains six SNP  
353 loci, making it necessary to analyze these SNPs in this small region in detail to determine whether  
354 multiple QTL are involved. The most significant SNP in this region could explain about 8.19% of the  
355 phenotypic variation. Apart from significant SNPs, potentially significant QTLs were detected on many  
356 chromosomes (including Chr 2, 3, 6, 7, 10, 11, 15, 16, 20, 28, 30, 32, 36), with a total of 25 implied  
357 significant SNPs ( $4.90 < -\log(p) < 7.30$ ). On Chr 30, the suggestively significant SNPs were located  
358 between 1,258,517 and 2,422,666 bp, spanning approximately 1.16 Mb, with the most significant SNPs  
359 in this region explaining approximately 6.12% of the phenotypic variation (**Table 4**). In the present study,  
360 we identified genes in the region near the significant SNPs, annotating a total of 21 genes. These genes

361 may be important in mediating growth and development, and we **inference** that the *LDLRAD4* gene may  
362 play a key role in developmental plasticity in geese, while the *GPR180* gene may regulate the locomotor  
363 behavior of geese to make them stronger (**Fig. 6**). **GWAS peaks overlapped with genomic regions with**  
364 **selective features on some chromosomes (Supplementary Data)**. This suggests that the region carrying  
365 **QTL are not only associated with body weight in GWAS, but are also under selection during**  
366 **domestication.**

## 367 **Discussion**

368 Despite the importance of the genus *Anser*, an economically important animal, the relative scarcity of  
369 genomic resources has largely hindered progress in studying genome evolution and molecular breeding  
370 in the major animals. High-quality chromosome-level genomes can provide key resources for studying.  
371 This study describes a chromosome-scale assembly of Lion-head goose obtained by a combination of  
372 data from the Illumina, SMRT, BioNano, and Hi-C platforms. The genome assembly is 1.19 Gb in length,  
373 and more than 97.27% of the assembled genome is anchored on 40 **pseudo-chromosomes**. The BUSCO  
374 assessment revealed 99.02% complete genes in the assembled genome, making it a better-continuity and  
375 higher-quality genome assembly than **the recently published Tianfu goose genome with a contig N50 of**  
376 **1.85 Mb and scaffold N50 of 33.12 Mb** [37]. Compared with the cultivated breed Tianfu goose, Lion-  
377 head goose, a traditional native breed, should occupy a more prominent position in the germplasm  
378 resources, and its evolving message can provide a reference for other local breeds which is worthy of  
379 in-depth study.

380 **Comparative genomics is the analysis of the structural characteristics of multiple individual genomes**  
381 **of a species or genomes of multiple species to find out the similarities and differences of gene sequences**  
382 **of species with the help of bioinformatics, and then to study the gene family analysis, analyze the**  
383 **differentiation and evolution of species, to provide a basis for elucidating species evolution. In this study,**  
384 **the evolutionary events of the Lion-head goose were analyzed by comparing the genome sequences with**  
385 **those of other birds. The results showed that the Lion-head goose and Zhedong White goose were most**  
386 **closely related, diverging at about 13.8 Mya, while the geese and ducks diverged at 28.4 Mya. The**

387 results were similar to those of Zhedong White goose, Sichuan White goose and Tianfu goose, indicating  
388 the accuracy of the assembly result of this study. Comparative genomic analysis revealed the genetic  
389 basis of interesting characters, which helped elucidate important biological implications and obtain  
390 solutions for genomic evolution between Lion-head geese and other species of *Anatidae* family,  
391 facilitating future genetic breeding programs. This is the first chromosomal level reference genome of  
392 Lion-head goose, providing important genomic data for the study of the family *Anatidae*.

393 The genomic information of the species population was obtained by whole-genome resequencing,  
394 and a large amount of variation information was obtained by comparison with the reference genome.  
395 Based on the correlation between differences in variation information and phenotypic differences of  
396 individuals, the adaptation of species to the environment, scanning of variant loci associated with  
397 important traits at the genome level, and localization of genetic mutations were discussed. Lion head  
398 goose, Magang goose, Huangzong goose and Wuzong goose are the main breeds of geese in Guangdong  
399 Province. Although they all belong to Guangdong Province, the body weight of adult geese varies greatly,  
400 and the molecular mechanism causing the huge difference is still unclear. In this study, four goose  
401 species were resequenced and examined for variation. Principal component analysis and phylogenetic  
402 tree analysis revealed significant differences among several goose species, indicating the feasibility of  
403 this study. Subsequently, GWAS was used to identify the candidate functional SNPs that might cause  
404 the weight difference of the four goose species, and the genes such as *LDLRAD4*, *GPR180*, and *OR*  
405 were analyzed and annotated, attributed to play an important role in mediating growth and development.  
406 Recently, there have been several studies related to agricultural traits that have achieved success in  
407 animal GWAS projects, for example, GWAS for improving reproductive performance and egg quality  
408 in geese and *TMEM161A* gene for embryo development [38]. Genome-wide association analysis of the  
409 early-lactation milk fat content in 3,513 Fleckvieh bulls and 2327 Holstein bulls detected 6 associated  
410 QTL regions, two of which were located near the gene *DGAT1* [39]. GWAS was conducted on 225  
411 ducks with different-sized black spots, and the results showed that *EDNRB2* was the gene  
412 responsible for the variation in duck body surface spot size [40]. In this study, *LDLRAD4* (low-

413 density lipoprotein receptor class A domain containing 4), *OR* (Olfactory receptor), and  
414 *GPR180* (G protein-coupled receptor 180) were mainly found to function in body weight traits.  
415 Knockdown of *LDLRAD4* enhances transforming growth factor (TGF)- $\beta$ -induced cell migration, which  
416 in turn regulates cell growth, differentiation, motility, apoptosis and matrix protein production [41]. The  
417 olfactory receptor (*OR2AT4*) has been shown to stimulate the proliferation of keratin-forming cells in  
418 peripheral human tissues [42]. *GPR180*, a component of the TGF- $\beta$  signaling pathway, also has  
419 metabolic relevance in the body and may play an essential role in regulating adipose tissue and systemic  
420 energy metabolism [43]. Here we found some correlation between these genes and the TGF- $\beta$  signaling,  
421 presumably this pathway also acts on body weight. Identifying of molecular genetic markers and the  
422 main effect QTL associated with critical agricultural traits is of great interest to breeders. Nevertheless,  
423 the candidate genes identified in this study were only detected by sequencing data and not  
424 experimentally validated. The functions of these candidate SNPs and gene markers need to be further  
425 verified by experimental results or other techniques. Thus, the findings in our GWAS study represent a  
426 valuable resource for geese and provide a new opportunity and basis for geneticists and breeders to work  
427 together to explore the genetics behind various agricultural traits.

## 428 **Conclusions**

429 In summary, we have obtained a high-quality chromosome-scale draft assembly of a purebred Lion-  
430 head goose, which provides a genetic basis for understanding the acquisition of related traits and  
431 facilitates advances in goose genomics and genetic improvement. Moreover, the candidate genes and  
432 their variants identified in this study will help clarify our understanding of goose selective breeding and  
433 the development of new breeds. The obtained genome sequence of Lion-head goose is a vital addition  
434 to the genome of genus *Anser* and is valuable for further understanding goose molecular breeding  
435 strategies. This genomic resource is also of high value for evolutionary studies of closely related species.

## 436 **Data Availability**

437 The final genome assembly data supporting the results of this article is available in the NCBI BioProject  
438 repository, [Accession number: PRJNA736831]. The RNA assembly data is available in the NCBI

439 BioProject repository, [Accession number: PRJNA807796]. The raw re-sequencing genome data  
440 supporting of the GWAS study is available in the NCBI BioProject repository [Accession number:  
441 PRJNA552198, PRJNA552383, and PRJNA552384].

## 442 **Additional Files**

443 **Supplementary Figure S1. Sequencing process and presentation.**

444 Supplementary **Figure S2.** BUSCO assessment of the assembly genome of Lion-head goose.

445 Supplementary **Figure S3.** Gene synteny between the Lion-head goose and duck genomes.

446 Supplementary Table S1. Statistics of sequenced clean data.

447 Supplementary Table S2. Statistics of genome survey.

448 Supplementary Table S3. **Statistics of genome assembly quality.**

449 **Supplementary Table S4. Summary of BUSCOs genome evaluation.**

450 **Supplementary Table S5: Summary of gene families from several species.**

451 Supplementary Table **S6.** GO annotation of expanded gene families from Anatidae varieties (Duck,  
452 Zhedong white goose, Lion-head goose; Top 20).

453 Supplementary Table **S7.** GO annotation of contraction gene families from Anatidae varieties (Duck,  
454 Zhedong white goose, Lion-head goose; Top 20).

455 Supplementary Table **S8.** GO annotation of unique gene families from the Lion-head goose.

456 **Supplementary Data. Significant information of selective-sweep analysis.**

## 457 **Abbreviations**

458 BLAST: Basic Local Alignment Search Tool; BWA: Burrows-Wheeler Aligner; BUSCO:  
459 Benchmarking Universal Single-Copy Orthologs; Chr: chromosome; GATK4: Genome Analysis Toolkit  
460 4; Gb: gigabase pairs; GO: gene ontology; GPR180: G protein-coupled receptor 180; GWAS: genome-  
461 wide association study; HERA: Highly Efficient Repeat Assembly; Hi-C: high-throughput chromosome  
462 conformation capture; Kb: kilobase pairs; kg: kilogram; LDLRAD4: low-density lipoprotein receptor  
463 class A domain containing 4; LTR: long terminal repeat; Mb: megabase pairs; Mya: million years ago;  
464 NCBI: National Center for Biotechnology Information; OR: Olfactory receptor; OR2AT4: olfactory

465 receptor family 2 subfamily AT member 4; PacBio: Pacific Biosciences; PCA: Principal component  
466 analysis; QTL: quantitative trait locus; RAxML: Randomized Axelerated Maximum Likelihood; RNA-  
467 seq: RNA sequencing; SMRT: single molecule real-time; SNP: single-nucleotide polymorphism; STAR:  
468 Spliced Transcripts Alignment to a Reference; TE: transposable element; TGF: transforming growth  
469 factor; TMEM161A: Transmembrane protein 161A.

## 470 **Competing Interests**

471 The authors declare that they have no conflict of interest.

## 472 **Funding**

473 This work was supported by the Key Research and Development Program of Guangdong Province  
474 (2020B020222001), the Construction of Modern Agricultural Science and Technology Innovation  
475 Alliance in Guangdong Province (2021KJ128, 2020KJ128), the National Modern Agricultural Industry  
476 Science and Technology Innovation Center in Guangzhou (2018kczx01), the Guangdong Provincial  
477 Promotion Project on Preservation and Utilization of Local Breed of Livestock and Poultry (4000-  
478 F18260), the Guangdong Basic and Applied Basic Research Foundation (2019A1515012006). The  
479 authors would like to thank the BGI in Shenzhen for their work on genome sequencing. We also thank  
480 the staff of Minglead Gene for providing the technical and computing support during the research.

## 481 **Author's Contributions**

482 Q.X., Z.L., and X.Z. conceived and designed the research. X.Z., J.C., and Q.Z. coordinated the project.  
483 J.C. and Z.L. provided animal samples. Q.Z. and Z. X. collected and prepared the samples. Q.Z.  
484 performed sequencing, assembly and bioinformatics analysis. W.L., and F.C. led work identifying  
485 genes, and H.L., W.C. aided with many aspects of gene identification and did the GO analyses. Q.Z.,  
486 X.Z. wrote and revised the manuscript and the supplementary information. J.W., M.J., Z.H., H.Z.,  
487 Z.L., and Q.X. participated in discussions and provided valuable advice. All authors read and approved  
488 the manuscript.

## 489 **References**

- 490 1. Hoyo JD, Elliott A, Sargatal J, et al. Handbook of the birds of the world. Barcelona: Lynx Edicions; 1992.
- 491 2. Madsen J, Marcussen LK, Knudsen N, et al. Does intensive goose grazing affect breeding waders? *Ecol Evol*  
492 2019;**9**(24):14512-14522. doi:10.1002/ece3.5923.
- 493 3. Wang Y, Li SM, Huang J, et al. Mutations of TYR and MITF Genes are Associated with Plumage Colour  
494 Phenotypes in Geese. *Asian-Australas J Anim Sci* 2014;**27**(6):778-83. doi:10.5713/ajas.2013.13350.
- 495 4. Gao G, Zhao X, Li Q, et al. Genome and metagenome analyses reveal adaptive evolution of the host and  
496 interaction with the gut microbiota in the goose. *Sci Rep* 2016;**6**:32961. doi:10.1038/srep32961.
- 497 5. Yao Y, Yang YZ, Gu TT, et al. Comparison of the broody behavior characteristics of different breeds of geese.  
498 *Poult Sci* 2019;**98**(11):5226-5233. doi:10.3382/ps/pez366.

- 499 6. Lu L, Chen Y, Wang Z, et al. The goose genome sequence leads to insights into the evolution of waterfowl  
500 and susceptibility to fatty liver. *Genome Biol* 2015;**16**:89. doi:10.1186/s13059-015-0652-y.
- 501 7. Li HF, Zhu WQ, Chen KW, et al. Two maternal origins of Chinese domestic goose. *Poult Sci*  
502 2011;**90**(12):2705-10. doi:10.3382/ps.2011-01425.
- 503 8. Tang J, Shen X, Ouyang H, et al. Transcriptome analysis of pituitary gland revealed candidate genes and gene  
504 networks regulating the growth and development in goose. *Anim Biotechnol* 2020:1-11.  
505 doi:10.1080/10495398.2020.1801457.
- 506 9. Zhang X, Wang J, Li X, et al. Transcriptomic investigation of embryonic pectoral muscle reveals increased  
507 myogenic processes in Shitou geese compared to Wuzong geese. *Br Poult Sci* 2021;**62**(5):650-657.  
508 doi:10.1080/00071668.2021.1912292.
- 509 10. Ardui S, Ameer A, Vermeesch JR, et al. Single molecule real-time (SMRT) sequencing comes of age:  
510 applications and utilities for medical diagnostics. *Nucleic Acids Res* 2018;**46**(5):2159-2168.  
511 doi:10.1093/nar/gky066.
- 512 11. Yoshinaga Y, Daum C, He G, et al. Genome Sequencing. *Methods Mol Biol* 2018;**1775**:37-52.  
513 doi:10.1007/978-1-4939-7804-5\_4.
- 514 12. Kong S, Zhang Y. Deciphering Hi-C: from 3D genome to function. *Cell Biol Toxicol* 2019;**35**(1):15-32.  
515 doi:10.1007/s10565-018-09456-2.
- 516 13. Nakano K, Shiroma A, Shimoji M, et al. Advantages of genome sequencing by long-read sequencer using  
517 SMRT technology in medical area. *Hum Cell* 2017;**30**(3):149-161. doi:10.1007/s13577-017-0168-8.
- 518 14. Jain M, Olsen HE, Turner DJ, et al. Linear assembly of a human centromere on the Y chromosome. *Nat*  
519 *Biotechnol* 2018;**36**(4):321-323. doi:10.1038/nbt.4109.
- 520 15. Sun L, Gao T, Wang F, et al. Chromosome-level genome assembly of a cyprinid fish *Onychostoma macrolepis*  
521 by integration of nanopore sequencing, Bionano and Hi-C technology. *Mol Ecol Resour* 2020;**20**(5):1361-  
522 1371. doi:10.1111/1755-0998.13190.
- 523 16. Bocklandt S, Hastie A, Cao H. Bionano Genome Mapping: High-Throughput, Ultra-Long Molecule Genome  
524 Analysis System for Precision Genome Assembly and Haploid-Resolved Structural Variation Discovery. *Adv*  
525 *Exp Med Biol* 2019;**1129**:97-118. doi:10.1007/978-981-13-6037-4\_7.
- 526 17. Koren S, Walenz BP, Berlin K, et al. Canu: scalable and accurate long-read assembly via adaptive k-mer  
527 weighting and repeat separation. *Genome Res* 2017;**27**(5):722-736. doi:10.1101/gr.215087.116.
- 528 18. Du H, Liang C. Assembly of chromosome-scale contigs by efficiently resolving repetitive sequences with long  
529 reads. *Nat Commun* 2019;**10**(1):5360. doi:10.1038/s41467-019-13355-3.
- 530 19. Li H, Durbin R. Fast and accurate short read alignment with Burrows-Wheeler transform. *Bioinformatics*  
531 2009;**25**(14):1754-60. doi:10.1093/bioinformatics/btp324.
- 532 20. Li H, Handsaker B, Wysoker A, et al. The Sequence Alignment/Map format and SAMtools. *Bioinformatics*  
533 2009;**25**(16):2078-9. doi:10.1093/bioinformatics/btp352.
- 534 21. Walker BJ, Abeel T, Shea T, et al. Pilon: an integrated tool for comprehensive microbial variant detection and  
535 genome assembly improvement. *Plos One* 2014;**9**(11):e112963. doi:10.1371/journal.pone.0112963.
- 536 22. Durand NC, Shamim MS, Machol I, et al. Juicer Provides a One-Click System for Analyzing Loop-Resolution  
537 Hi-C Experiments. *Cell Syst* 2016;**3**(1):95-8. doi:10.1016/j.cels.2016.07.002.
- 538 23. Dudchenko O, Batra SS, Omer AD, et al. De novo assembly of the *Aedes aegypti* genome using Hi-C yields  
539 chromosome-length scaffolds. *Science* 2017;**356**(6333):92-95. doi:10.1126/science.aal3327.
- 540 24. Servant N, Varoquaux N, Lajoie BR, et al. HiC-Pro: an optimized and flexible pipeline for Hi-C data processing.  
541 *Genome Biol* 2015;**16**(1). doi:10.1186/s13059-015-0831-x.
- 542 25. Bolger AM, Lohse M, Usadel B. Trimmomatic: a flexible trimmer for Illumina sequence data. *Bioinformatics*  
543 2014;**30**(15):2114-20. doi:10.1093/bioinformatics/btu170.
- 544 26. Grabherr MG, Haas BJ, Yassour M, et al. Full-length transcriptome assembly from RNA-Seq data without a  
545 reference genome. *Nat Biotechnol* 2011;**29**(7):644-52. doi:10.1038/nbt.1883.
- 546 27. Huang Y, Niu B, Gao Y, et al. CD-HIT Suite: a web server for clustering and comparing biological sequences.  
547 *Bioinformatics* 2010;**26**(5):680-2. doi:10.1093/bioinformatics/btq003.
- 548 28. Dobin A, Davis CA, Schlesinger F, et al. STAR: ultrafast universal RNA-seq aligner. *Bioinformatics*  
549 2013;**29**(1):15-21. doi:10.1093/bioinformatics/bts635.
- 550 29. Seppy M, Manni M, Zdobnov EM. BUSCO: Assessing Genome Assembly and Annotation Completeness.  
551 *Methods Mol Biol* 2019;**1962**:227-245. doi:10.1007/978-1-4939-9173-0\_14.
- 552 30. Lu L, Chen Y, Wang Z, et al. The goose genome sequence leads to insights into the evolution of waterfowl  
553 and susceptibility to fatty liver. *Genome Biol* 2015;**16**:89. doi:10.1186/s13059-015-0652-y.
- 554 31. Benson G. Tandem repeats finder: a program to analyze DNA sequences. *Nucleic Acids Res* 1999;**27**(2):573-  
555 80. doi:10.1093/nar/27.2.573.
- 556 32. Wang Y, Tang H, Debarry JD, et al. MScanX: a toolkit for detection and evolutionary analysis of gene

- 557 synteny and collinearity. *Nucleic Acids Res* 2012;**40**(7):e49. doi:10.1093/nar/gkr1293.
- 558 33. Stamatakis A. RAxML version 8: a tool for phylogenetic analysis and post-analysis of large phylogenies.
- 559 *Bioinformatics* 2014;**30**(9):1312-3. doi:10.1093/bioinformatics/btu033.
- 560 34. Sanderson MJ. r8s: inferring absolute rates of molecular evolution and divergence times in the absence of a
- 561 molecular clock. *Bioinformatics* 2003;**19**(2):301-2. doi:10.1093/bioinformatics/19.2.301.
- 562 35. Han MV, Thomas GW, Lugo-Martinez J, et al. Estimating gene gain and loss rates in the presence of error in
- 563 genome assembly and annotation using CAFE 3. *Mol Biol Evol* 2013;**30**(8):1987-97.
- 564 doi:10.1093/molbev/mst100.
- 565 36. Yu G, Wang LG, Han Y, et al. clusterProfiler: an R package for comparing biological themes among gene
- 566 clusters. *Omics* 2012;**16**(5):284-7. doi:10.1089/omi.2011.0118.
- 567 37. Li Y, Gao G, Lin Y, et al. Pacific Biosciences assembly with Hi-C mapping generates an improved,
- 568 chromosome-level goose genome. *Gigascience* 2020;**9**(10). doi:10.1093/gigascience/giaa114.
- 569 38. Gao G, Gao D, Zhao X, et al. Genome-Wide Association Study-Based Identification of SNPs and Haplotypes
- 570 Associated With Goose Reproductive Performance and Egg Quality. *Front Genet* 2021;**12**:602583.
- 571 doi:10.3389/fgene.2021.602583.
- 572 39. Daetwyler HD, Capitan A, Pausch H, et al. Whole-genome sequencing of 234 bulls facilitates mapping of
- 573 monogenic and complex traits in cattle. *Nat Genet* 2014;**46**(8):858-65. doi:10.1038/ng.3034.
- 574 40. Xi Y, Xu Q, Huang Q, et al. Genome-wide association analysis reveals that EDNRB2 causes a dose-dependent
- 575 loss of pigmentation in ducks. *Bmc Genomics* 2021;**22**(1):381. doi:10.1186/s12864-021-07719-7.
- 576 41. Nakano N, Maeyama K, Sakata N, et al. C18 ORF1, a novel negative regulator of transforming growth factor-
- 577 beta signaling. *J Biol Chem* 2014;**289**(18):12680-92. doi:10.1074/jbc.M114.558981.
- 578 42. Cheret J, Bertolini M, Ponce L, et al. Olfactory receptor OR2AT4 regulates human hair growth. *Nat Commun*
- 579 2018;**9**(1):3624. doi:10.1038/s41467-018-05973-0.
- 580 43. Balazova L, Balaz M, Horvath C, et al. GPR180 is a component of TGFbeta signalling that promotes
- 581 thermogenic adipocyte function and mediates the metabolic effects of the adipocyte-secreted factor CTHRC1.
- 582 *Nat Commun* 2021;**12**(1):7144. doi:10.1038/s41467-021-27442-x.
- 583



584 **Figure legends**

585

586 **Figure 1. A picture of a male adult Lion-head goose.**

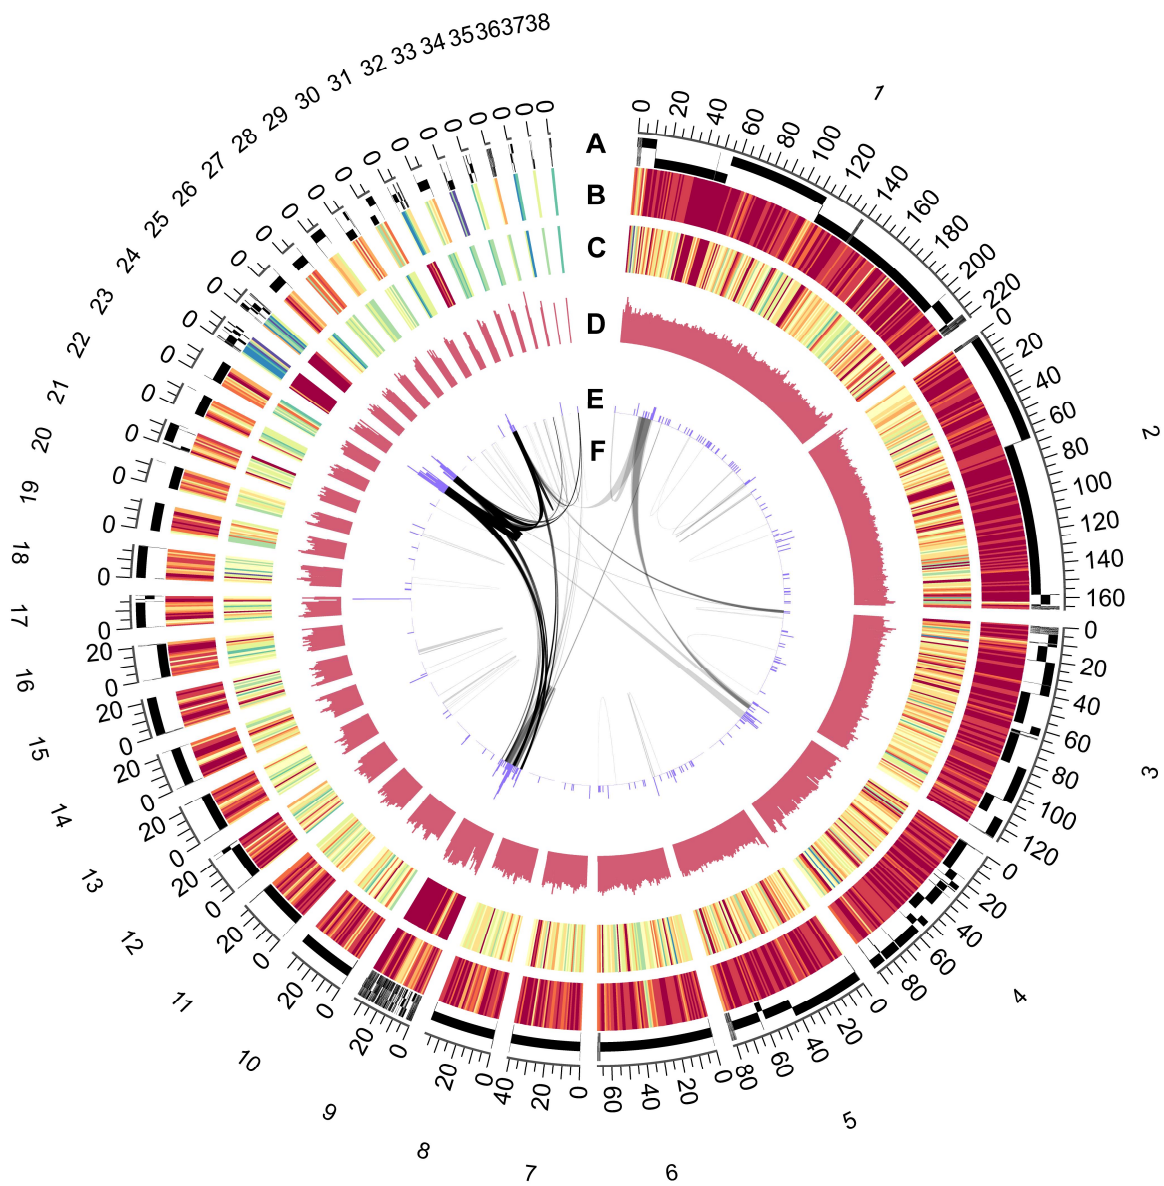

588

589 **Figure 2. Distribution of genomic features.** Concentric circle diagram presents the distribution of  
 590 genomic features of Lion-head goose using nonoverlapping sliding windows with sizes of 1 Mb (from  
 591 outmost to innermost). (A) the assembled pseudo-chromosome and the corresponding position; (B) gene  
 592 density calculated on the basis of the number of genes; (C) average expression level of overall 36  
 593 samples. eight tissues (i.e., brain, pharyngeal pouch, head sarcoma, spleen, liver, chest muscle, kidney  
 594 and heart) and blood collected from four healthy adult animals; (D) GC content; (E) density of TE; (F)  
 595 gene synteny and collinearity analysis.

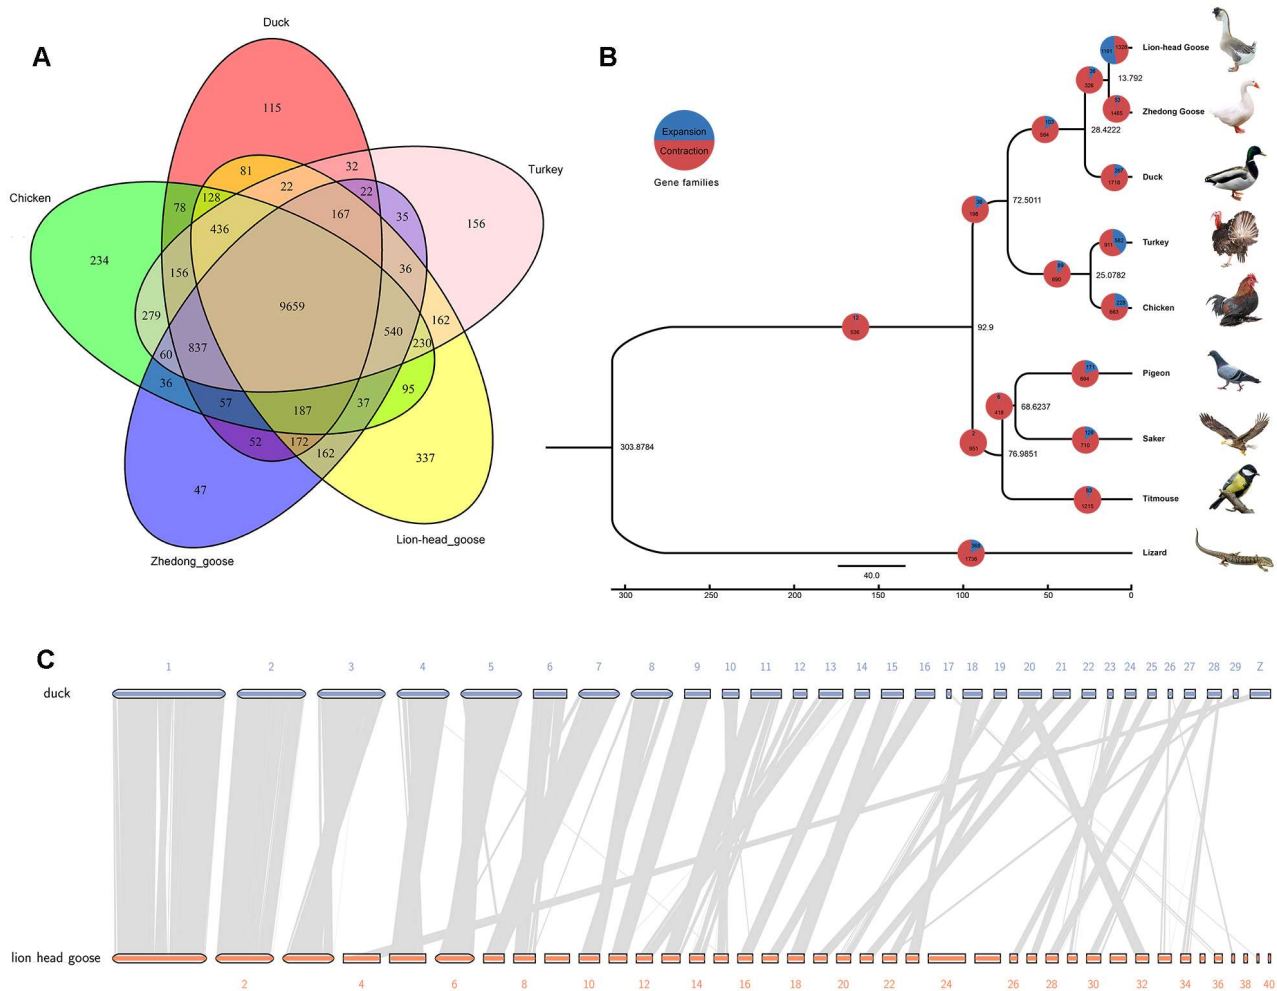

596

597 **Figure 3. Phylogenetic relationship and comparative genomics analyses.** (A) Venn diagram showing  
 598 the orthologous gene families shared among the genomes of Lion-head goose, Zhedong white goose,  
 599 chicken, duck, and turkey. (B) Phylogenetic tree with the divergence times and history of orthologous  
 600 gene families. Numbers on the nodes represent divergence times. The numbers of gene families that  
 601 expanded (green) or contracted (red) in each lineage after speciation are shown on the circles of the  
 602 corresponding branch. (C) Gene comparison of homologous chromosomes between Lion-head goose  
 603 and duck. Gray lines indicate collinearity between the genomes.

A

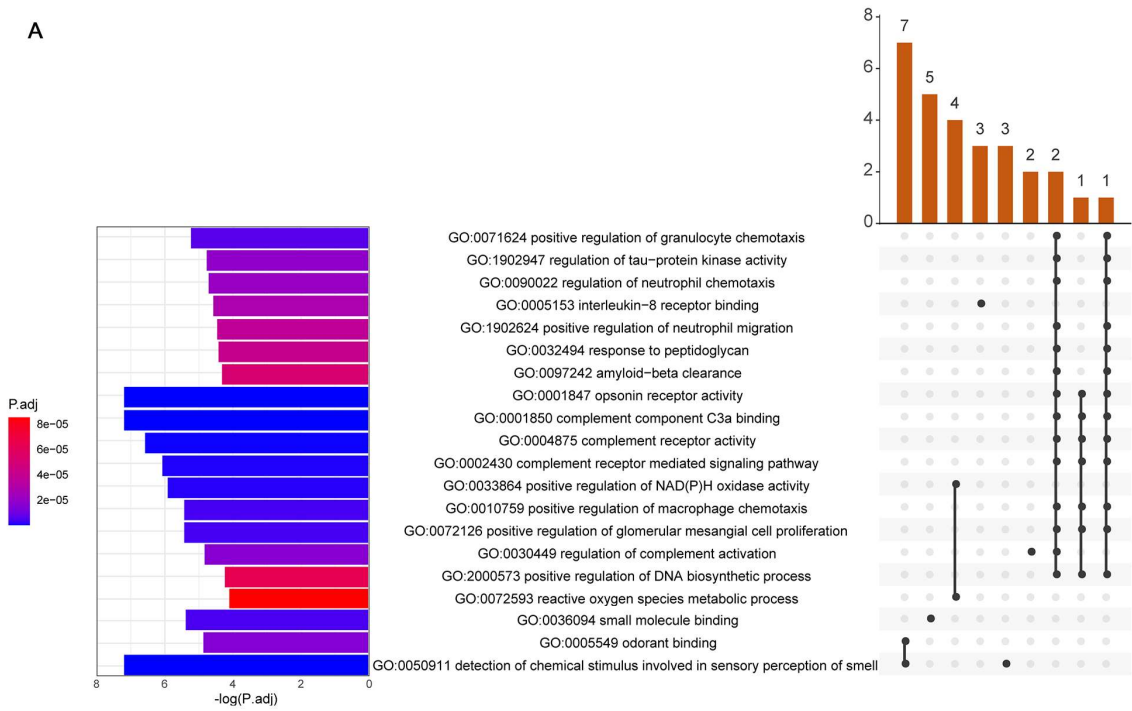

B

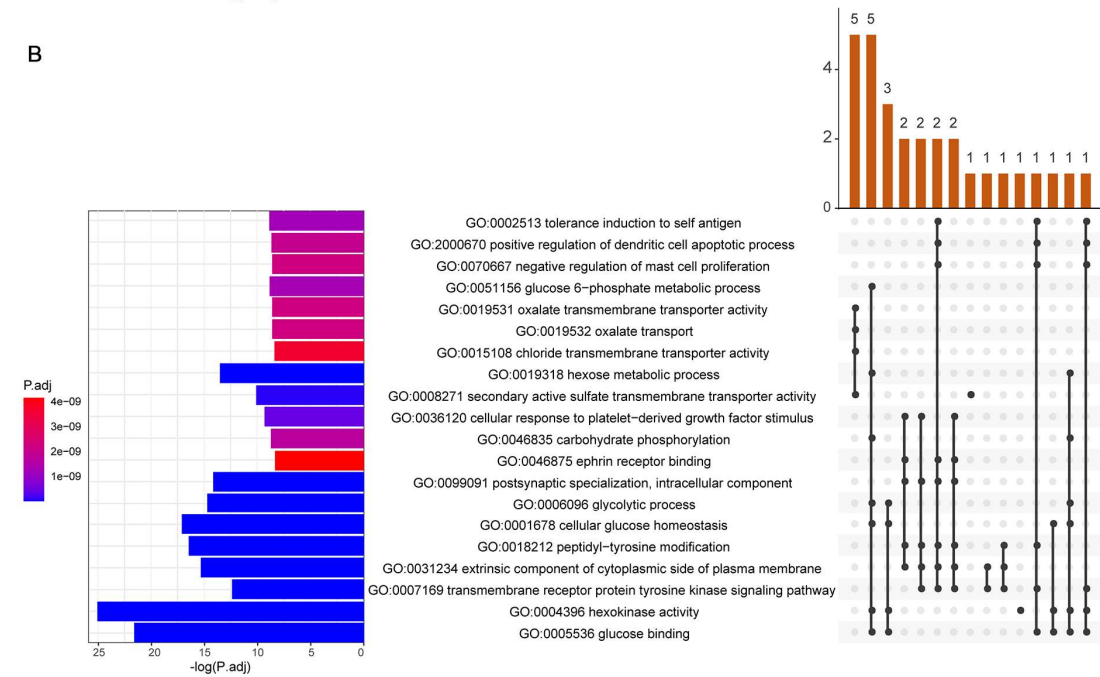

C

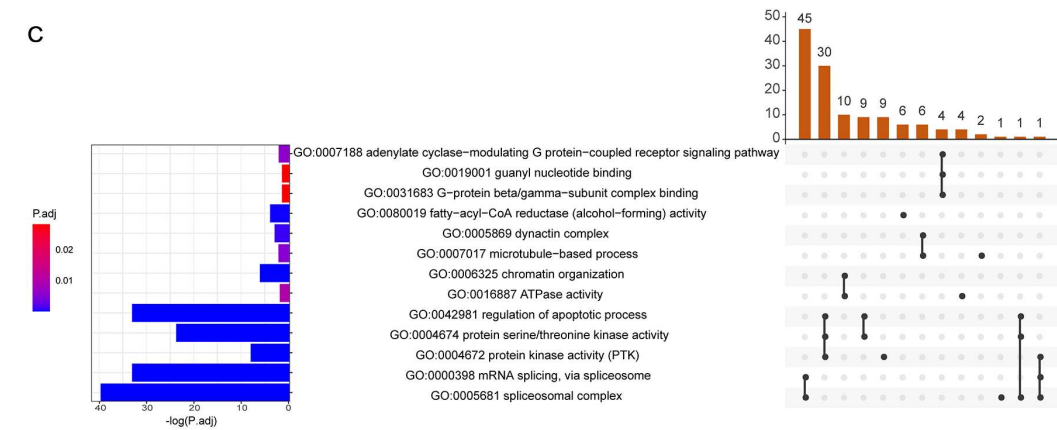

605 **Figure 4. GO enrichment analysis of gene families.** (A) Expanded and (B) contracted gene families  
606 from Anatidae varieties (duck, Zhedong white goose, Lion-head goose). (C) Unique gene families from  
607 the Lion-head goose. The bar graph on the left represents the P-adjust gradient of GO terms, and the  
608 color corresponds to the number on the x-axis (i.e.  $-\log(P.\text{adj})$ ). The bluer the color is, the smaller the  
609 P-adjust is, and the more significant it is. The redder the color is, the larger the P-adjust is, and the less  
610 significant it is. The upper right bar chart exhibits that several genes act together on the terms below.  
611 The lower right chart displays the intersection of the genes of each term; the dots connected by lines  
612 represent the intersection of multiple terms; the black dots represent “yes”, and the gray dots represent  
613 “no”.

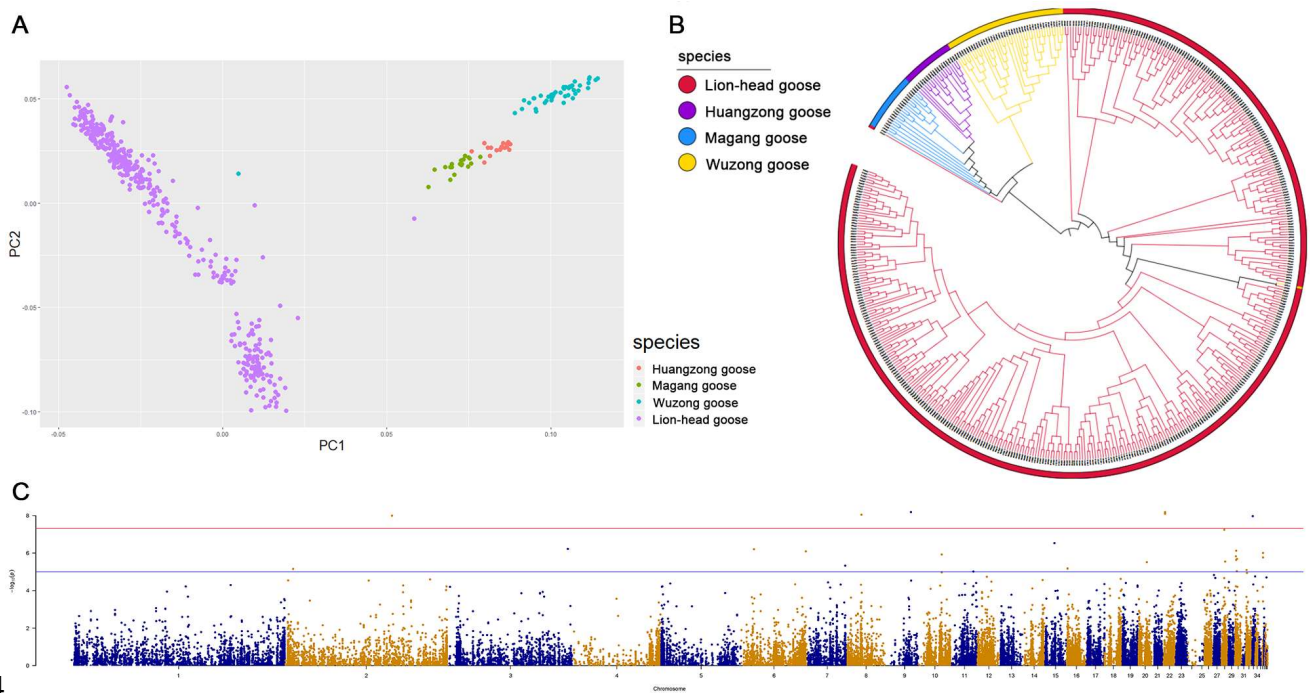

614

615 **Figure 5. Comparison of different goose species and genome-wide association analysis of body**

616 **weight. (A)** Principal component analysis of sample structures using first two principal components. **(B)**

617 The phylogenetic trees of several goose species. **(C)** Manhattan plot of genome-wide association

618 analysis for body weight. The X-axis indicates chromosomes, and Y-axis indicates the P values of the

619 SNP markers. The red solid line indicates the threshold P value for genome-wide significance. The blue

620 solid line indicates the threshold P value for the significance of potential association.

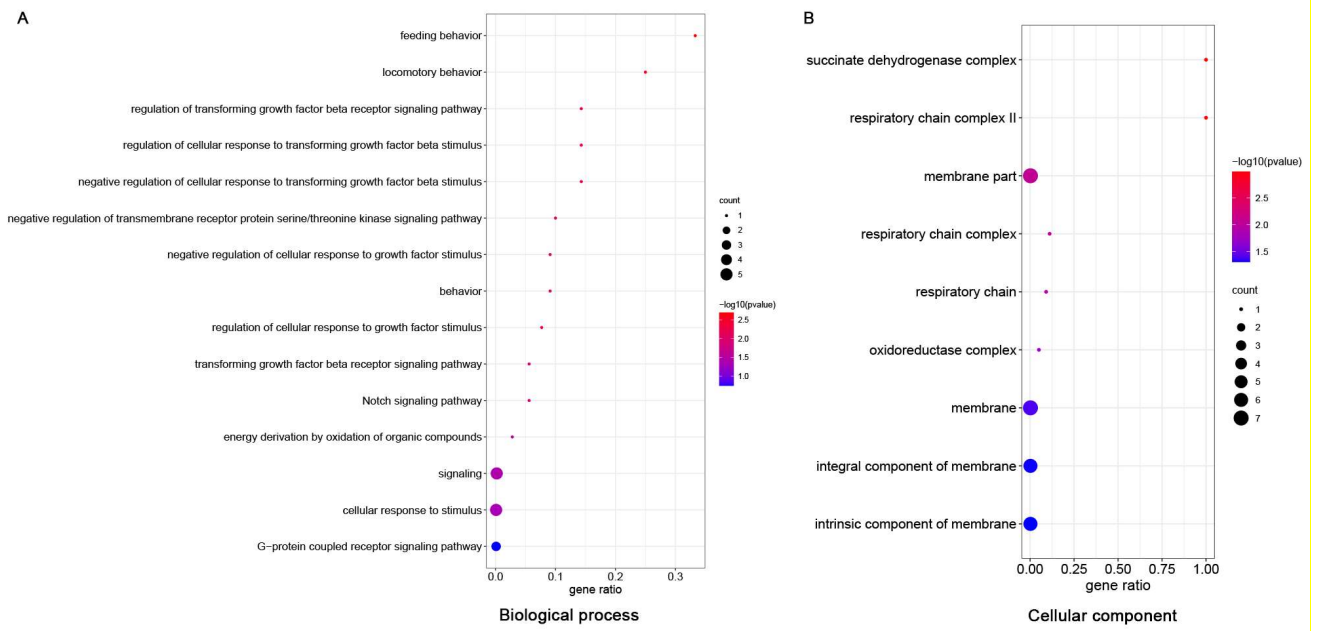

621

622 **Figure 6. GO analysis of body weight-related genes:(A) Biological processes level, (B) Cellular**

623 **component level.**

**Table 1:** Summary of repeat classification.

| Type                              | Length      | Percent |
|-----------------------------------|-------------|---------|
| Long interspersed nuclear element | 76,437,757  | 5.98    |
| Simple sequence repeats           | 23,026,311  | 1.80    |
| Low complexity                    | 4,663,288   | 0.36    |
| Tandem repeats                    | 52,426,380  | 4.10    |
| Total                             | 156,553,736 | 12.25   |

624

**Table 2:** Comparison of the present study with previous quality metrics of goose genome assembly.

| Genomic features                      | Lion-head goose | Zhedong white goose | Sichuan white goose | Tianfu goose  |
|---------------------------------------|-----------------|---------------------|---------------------|---------------|
| Estimate of genome size (bp)          | 1,278,045,811   | 1,208,661,181       | 1,198,802,839       | 1,277,099,016 |
| Total length of contigs (bp)          | 1,268,074,106   | 1,086,838,604       | 1,100,859,441       | 1,113,842,245 |
| Total length of scaffolds (bp)        | 1,277,289,474   | 1,122,178,121       | 1,130,663,797       | 1,113,913,845 |
| Number of contigs                     | 1,318           | 60,979              | 53,336              | 2,771         |
| Number of scaffolds                   | 1,266           | 1,050               | 1,837               | 2,055         |
| Contig N50 (bp)                       | 21,589,146      | 27,602              | 35,032              | 1,849,874     |
| Scaffold N50 (bp)                     | 27,064,542      | 5,202,740           | 5,103,766           | 33,116,532    |
| Longest contig (bp)                   | 91,420,268      | 201,281             | 399,111             | 10,766,871    |
| Longest scaffold (bp)                 | 98,160,899      | 24,051,356          | 20,207,557          | 70,896,740    |
| GC content                            | 42.39%          | 38.00%              | 41.68%              | 42.15%        |
| No. of predicted protein-coding genes | 21,010          | 16,150              | 16,288              | 17,568        |
| Percentage of repeat sequences        | 12.25%          | 6.33%               | 6.90%               | 8.67%         |

625

**Table 3:** Descriptive statistical of body weight traits.

| Species         | Number | Max (Kg) | Min (Kg) | Mean±SEM   |
|-----------------|--------|----------|----------|------------|
| Lion-head goose | 416    | 15.70    | 9.00     | 13.55±1.97 |
| Magang goose    | 20     | 5.50     | 4.80     | 5.32±0.36  |
| Huangzong goose | 20     | 4.30     | 2.70     | 3.40±0.83  |
| Wuzong goose    | 44     | 2.50     | 1.80     | 2.24±0.25  |

626

**Table 4:** Genome-wide association analysis of body weight in geese.

| Chr | Allele | Physical position | Regression coefficient | P value  | Genes      |
|-----|--------|-------------------|------------------------|----------|------------|
| 2   | A      | 108496954         | -0.1886                | 1.01E-08 | LDLRAD4    |
| 2   | G      | 7706165           | 0.2612                 | 6.98E-06 | LDLRAD4    |
| 3   | T      | 123032780         | -0.3979                | 6.03E-07 | EGF, KBTBD |
| 6   | A      | 13264157          | -0.24                  | 6.28E-07 | TSPAN      |
| 6   | T      | 66027192          | 0.2127                 | 8.14E-07 | IGFN1      |
| 7   | T      | 39117443          | -0.3131                | 4.66E-06 | —          |
| 8   | T      | 14712470          | 0.1865                 | 8.97E-09 | PPEF1      |
| 9   | T      | 26883582          | -2.7E+12               | 0        | OR         |
| 10  | C      | 23997415          | -0.3032                | 1.19E-06 | —          |
| 10  | C      | 23997399          | -0.2542                | 1.05E-05 | —          |



|    |   |          |         |          |                |
|----|---|----------|---------|----------|----------------|
| 10 | T | 23997401 | -0.2542 | 1.05E-05 | —              |
| 11 | A | 22838749 | 0.1548  | 9.55E-06 | —              |
| 15 | T | 10257386 | 0.2527  | 2.96E-07 | GPR180, GPCPD1 |
| 16 | A | 1477673  | -0.1892 | 6.53E-06 | —              |
| 16 | G | 1477679  | -0.1891 | 6.78E-06 | —              |
| 20 | A | 8531879  | 0.151   | 3.05E-06 | —              |
| 22 | A | 1992485  | -0.3972 | 6.51E-09 | GALNT, AUTS2   |
| 22 | A | 1992518  | -0.3973 | 7.69E-09 | GALNT, AUTS2   |
| 22 | G | 1992501  | -0.3974 | 7.94E-09 | GALNT, AUTS2   |
| 22 | C | 1992505  | -0.3974 | 7.94E-09 | GALNT, AUTS2   |
| 22 | C | 1992507  | -0.3974 | 7.94E-09 | GALNT, AUTS2   |
| 22 | G | 1992515  | -0.3974 | 7.94E-09 | GALNT, AUTS2   |
| 28 | C | 3587271  | 0.2936  | 5.81E-08 | PPP1R15B, FGD2 |
| 28 | G | 4472051  | -0.2359 | 2.82E-06 | PPP1R15B, FGD2 |
| 30 | C | 1652158  | -0.3469 | 7.53E-07 | SH2            |
| 30 | T | 1258517  | 0.2205  | 1.48E-06 | SH2            |
| 30 | G | 2422665  | 0.1894  | 2.04E-06 | SH2            |
| 30 | T | 2422666  | 0.1894  | 2.04E-06 | SH2            |
| 30 | A | 1652207  | -0.3289 | 2.3E-06  | SH2            |
| 30 | T | 2269897  | 0.211   | 9.22E-06 | SH2            |
| 32 | G | 655318   | 0.2599  | 7.95E-06 | —              |
| 33 | A | 975487   | 0.2567  | 1.07E-08 | SDHA           |
| 36 | A | 1523127  | -0.3274 | 9.86E-07 | SPRY           |
| 36 | G | 1523132  | -0.3216 | 1.7E-06  | SPRY           |
| 36 | C | 1523105  | -0.3291 | 1.72E-06 | SPRY           |

---

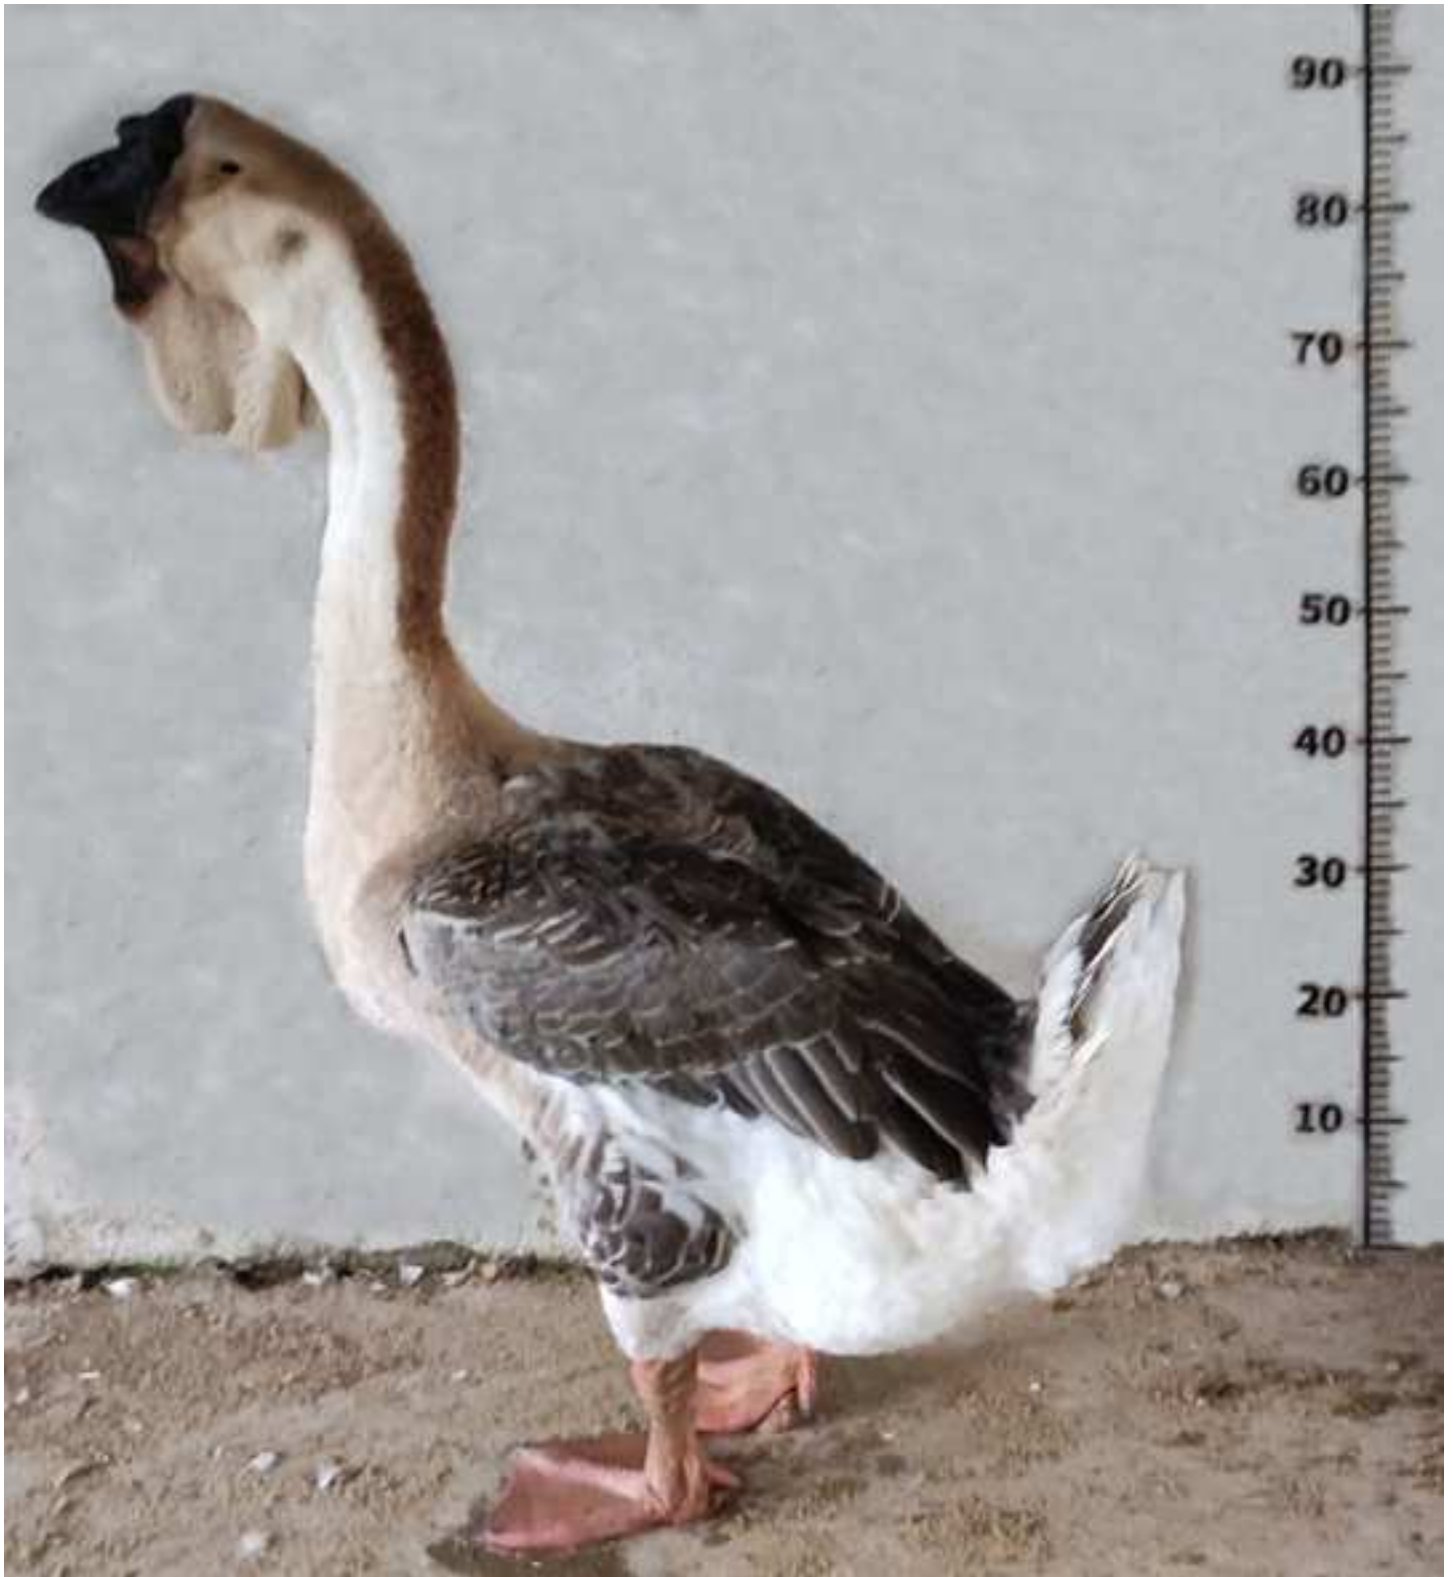

Figure 2

[Click here to access/download;Figure;2.tif](#)

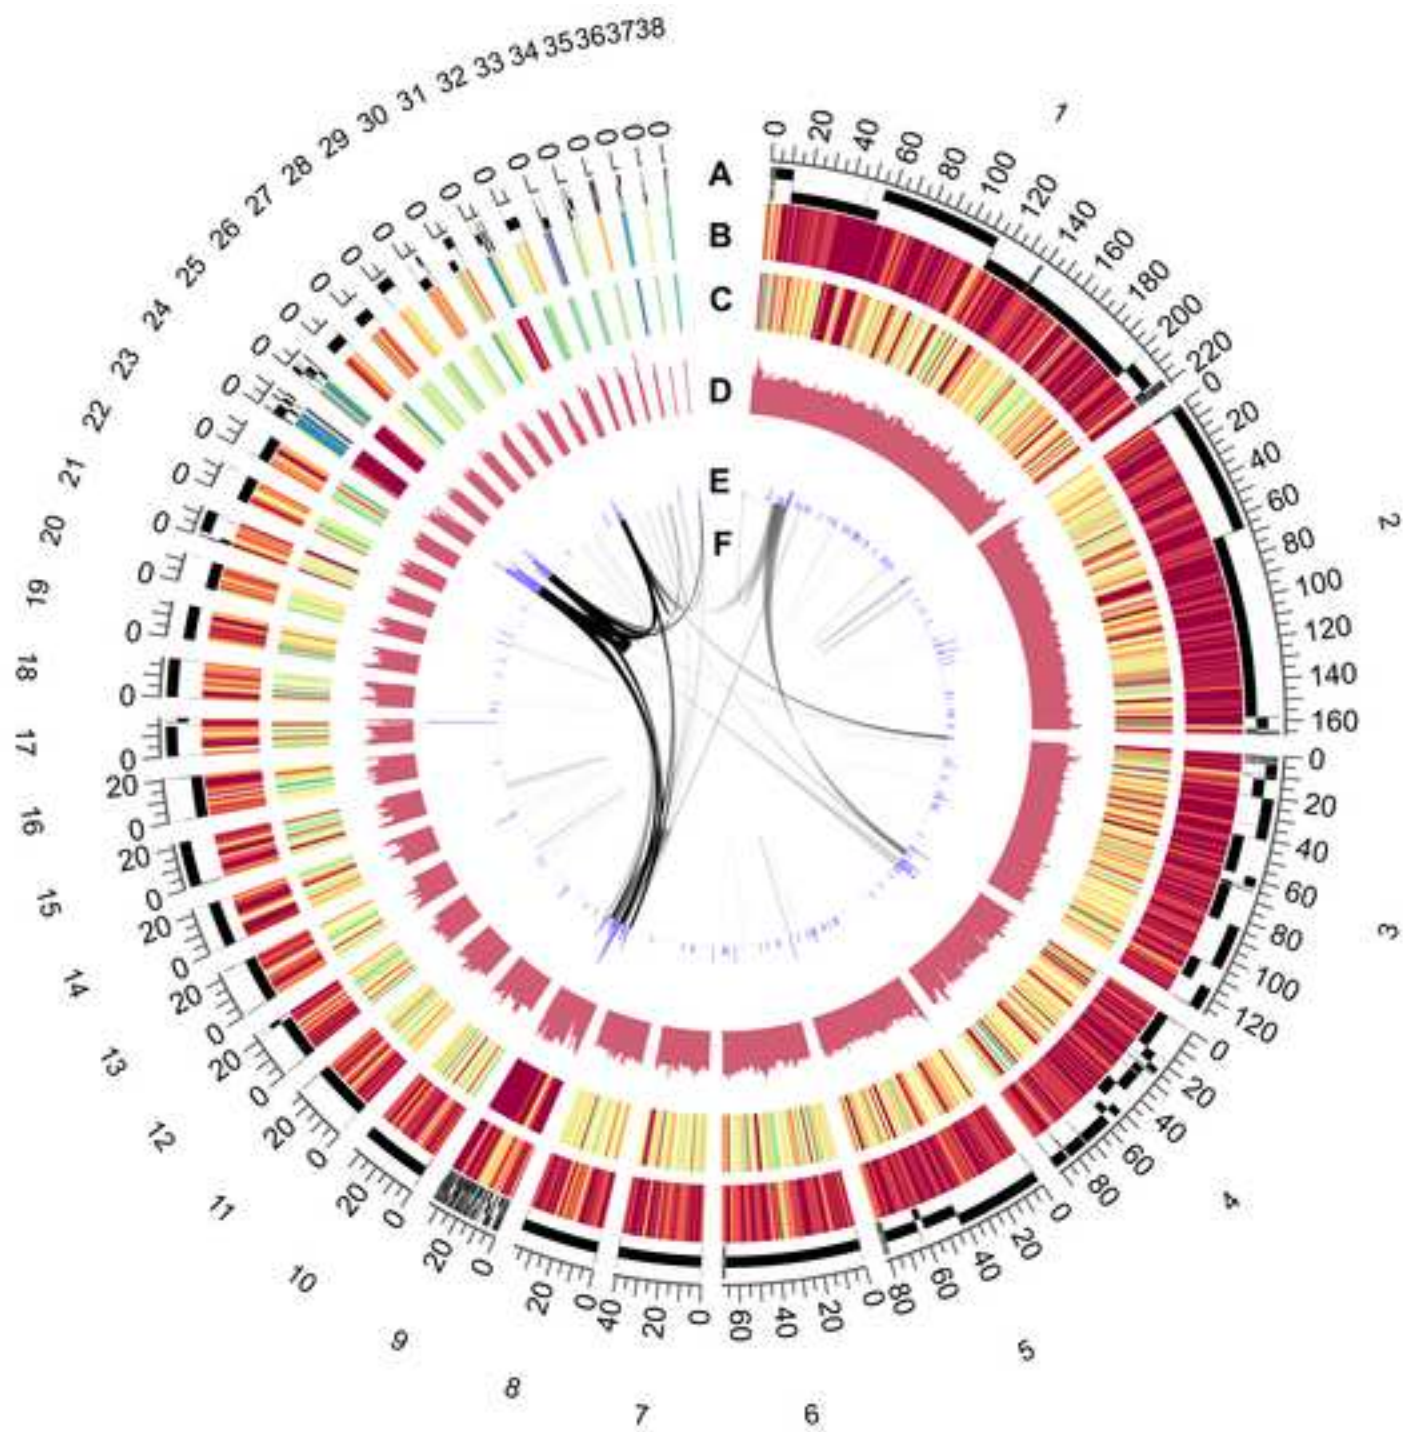

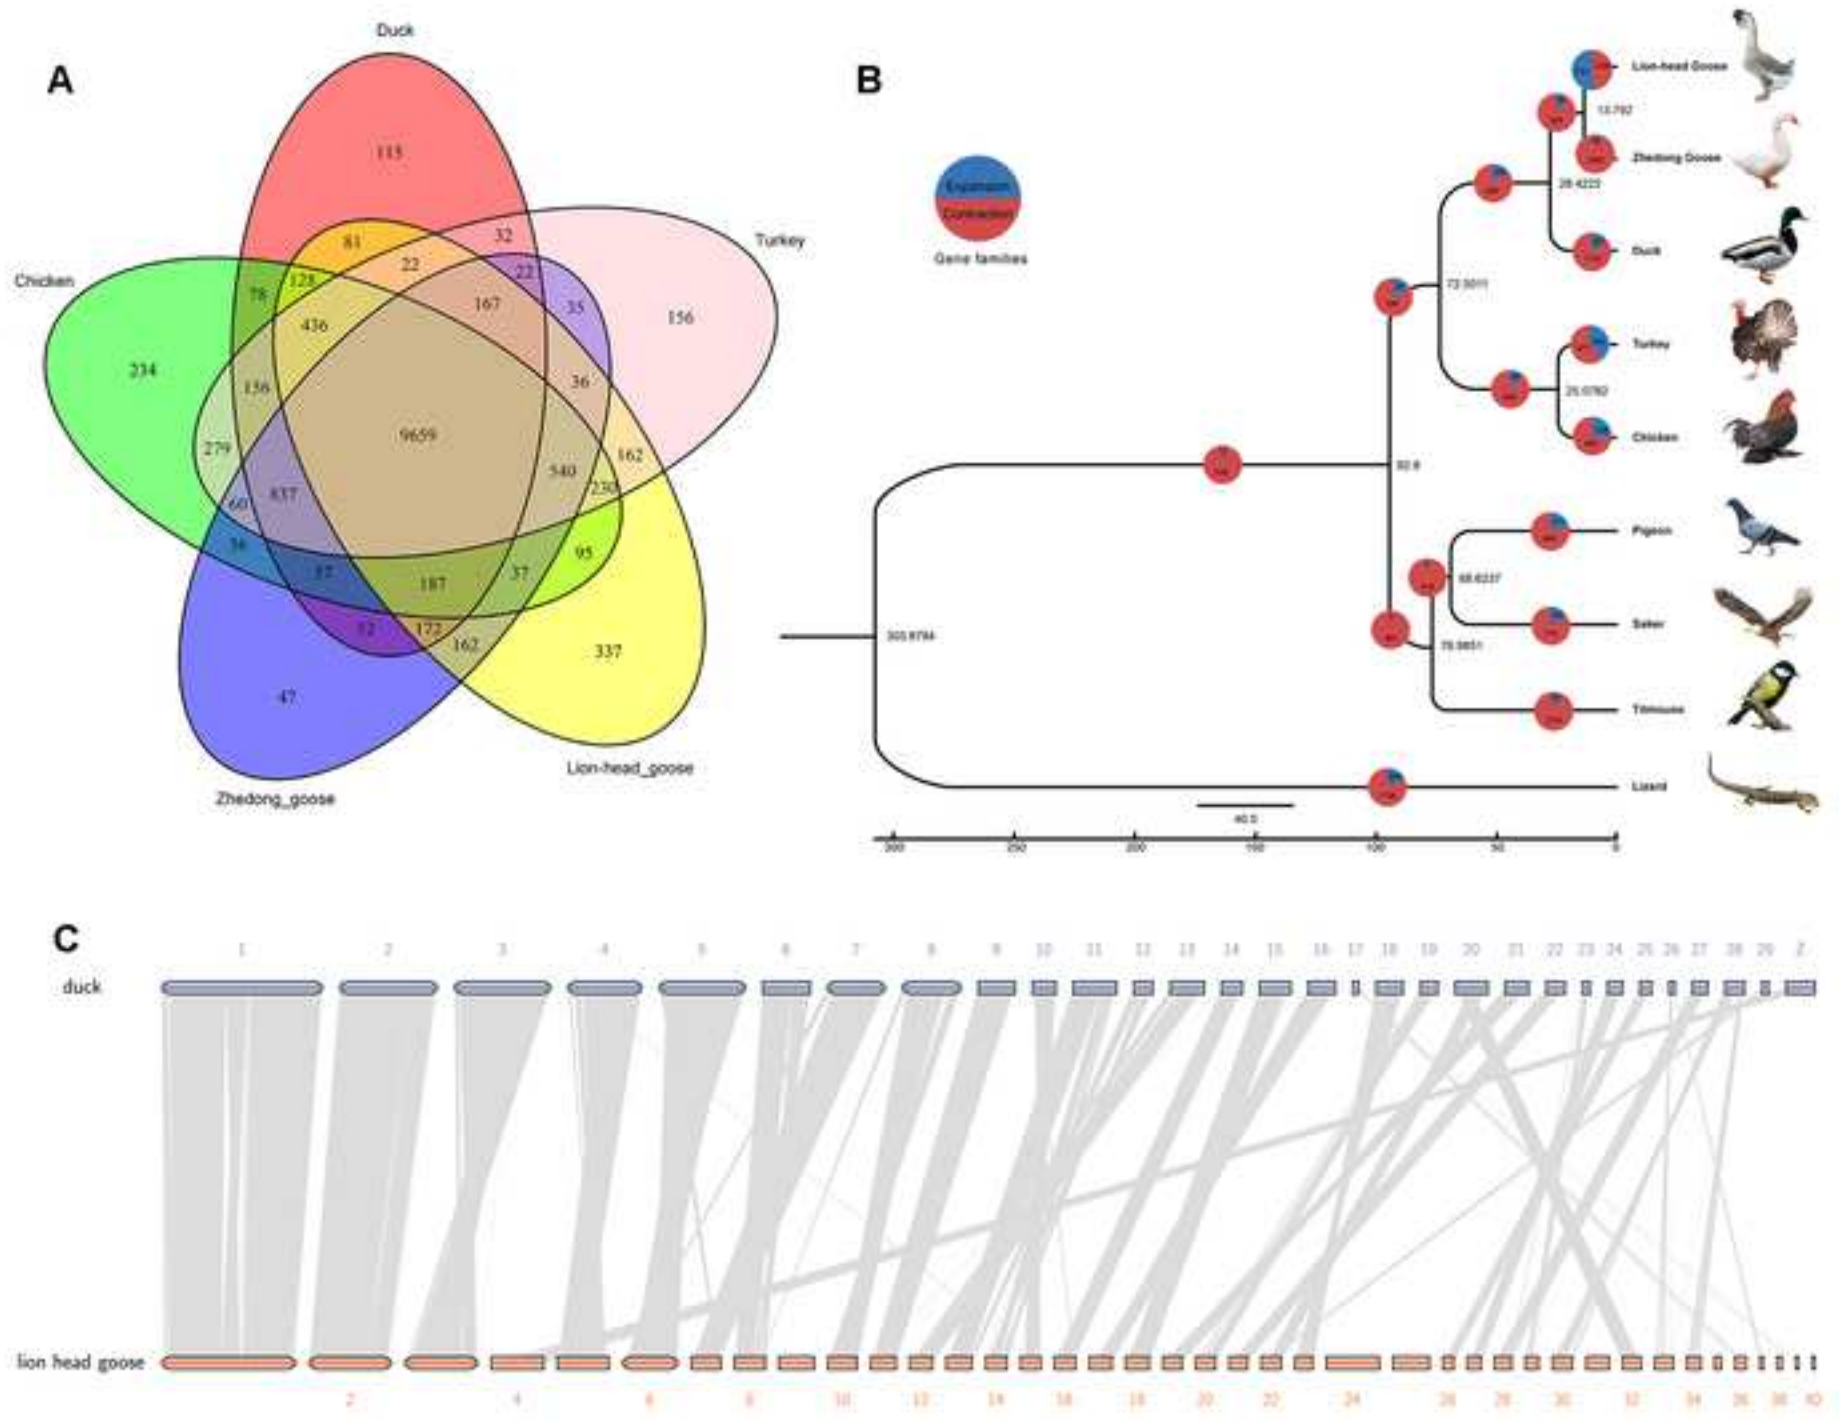

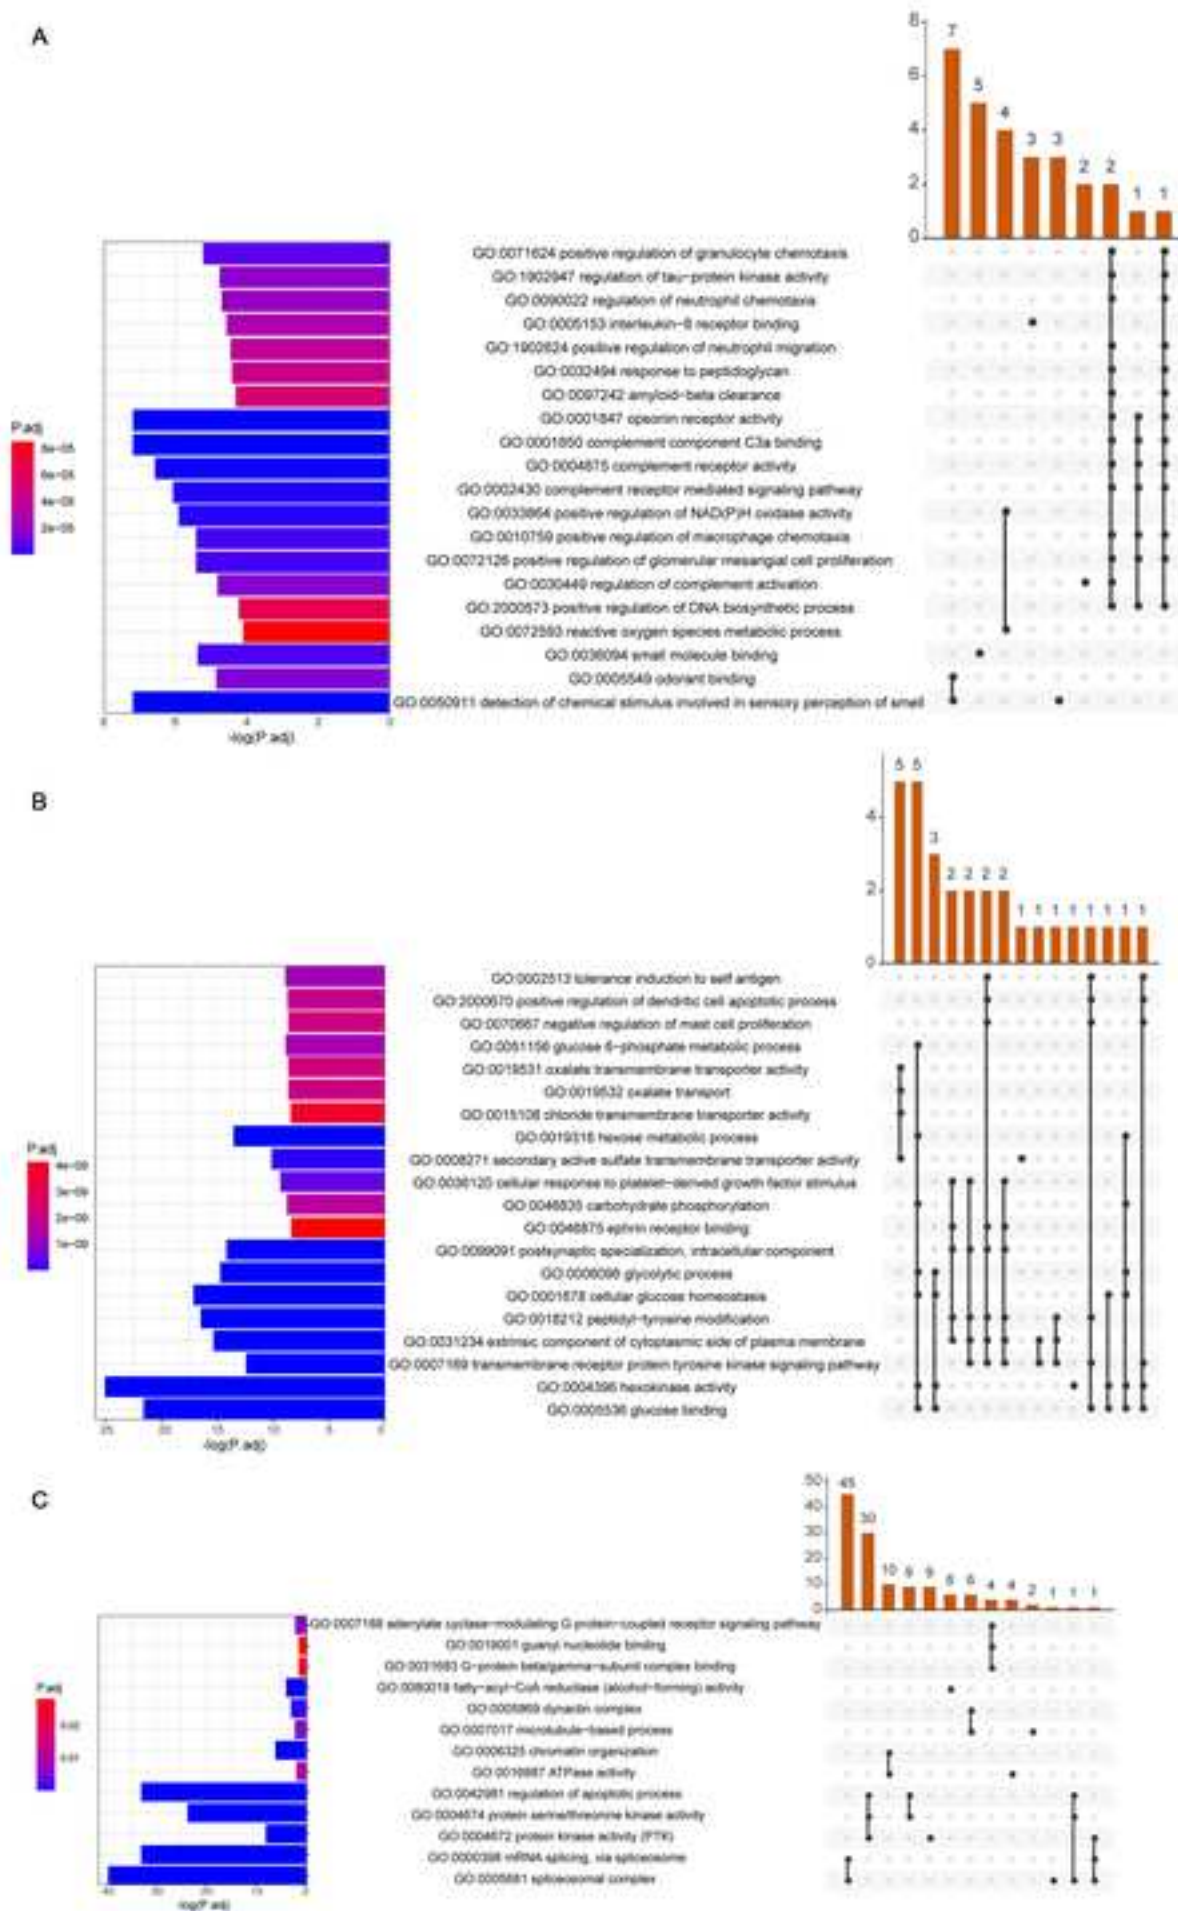

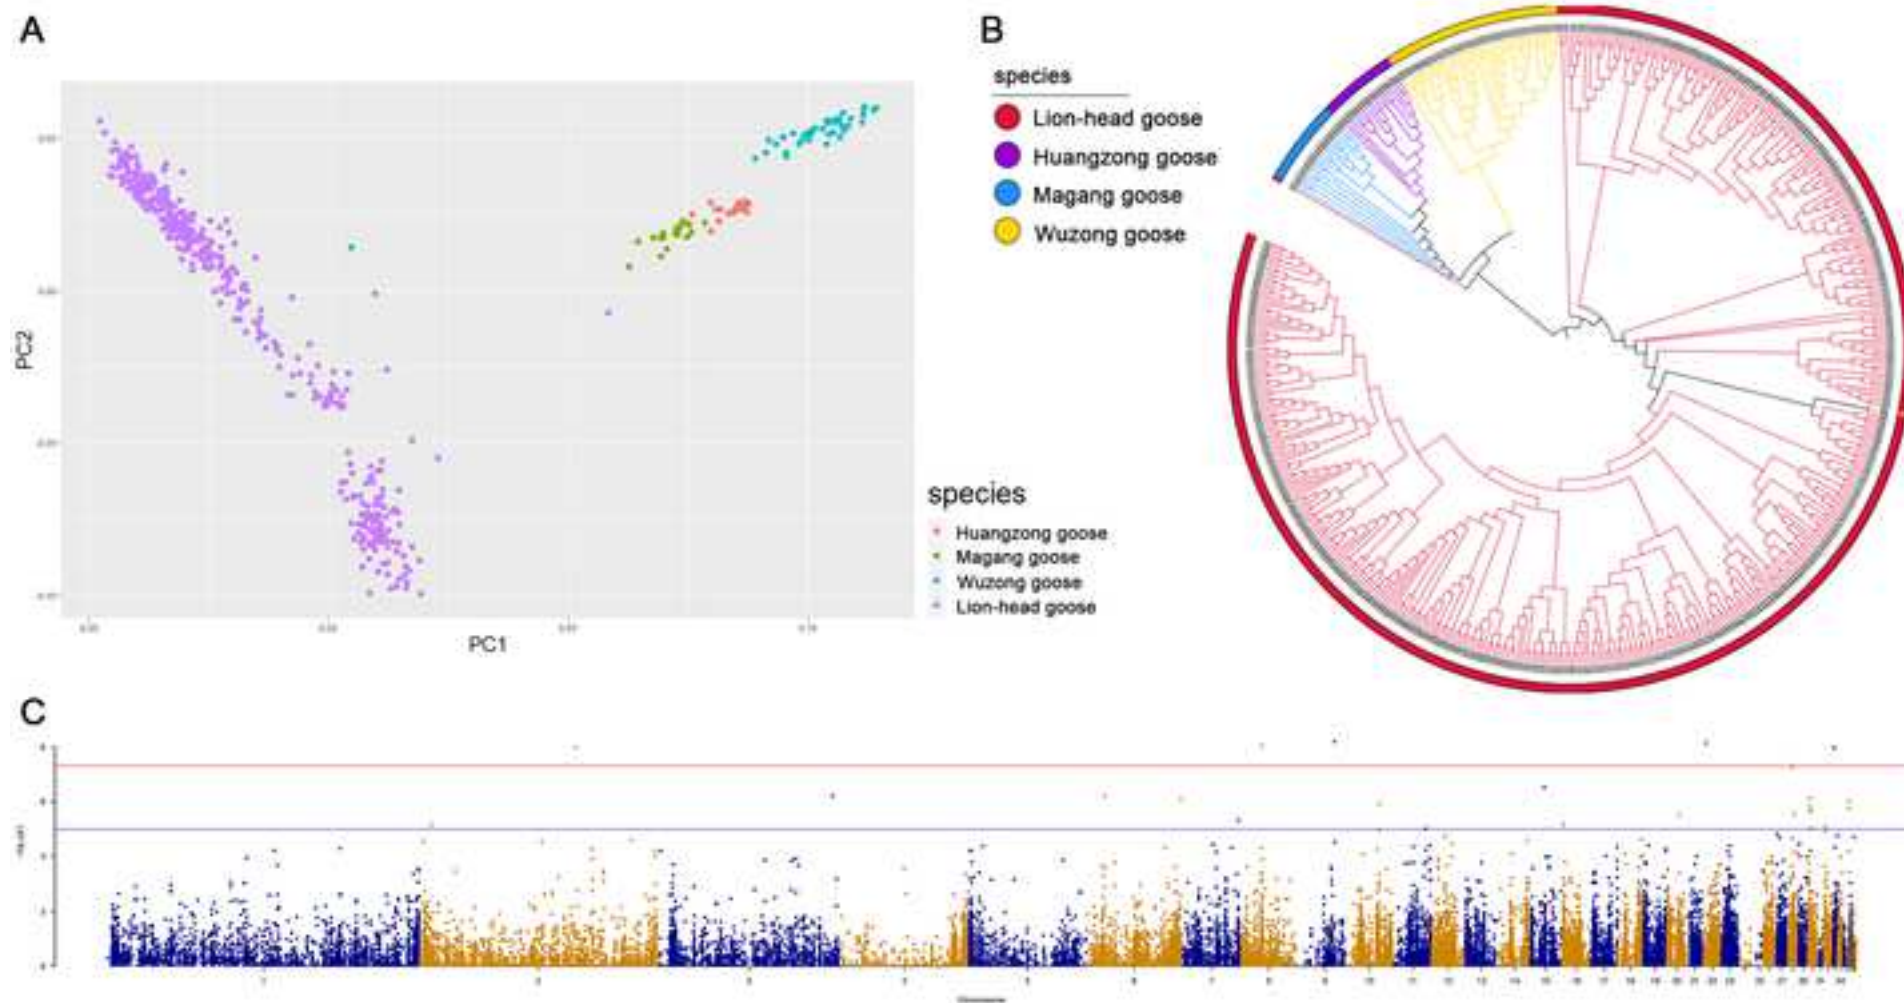

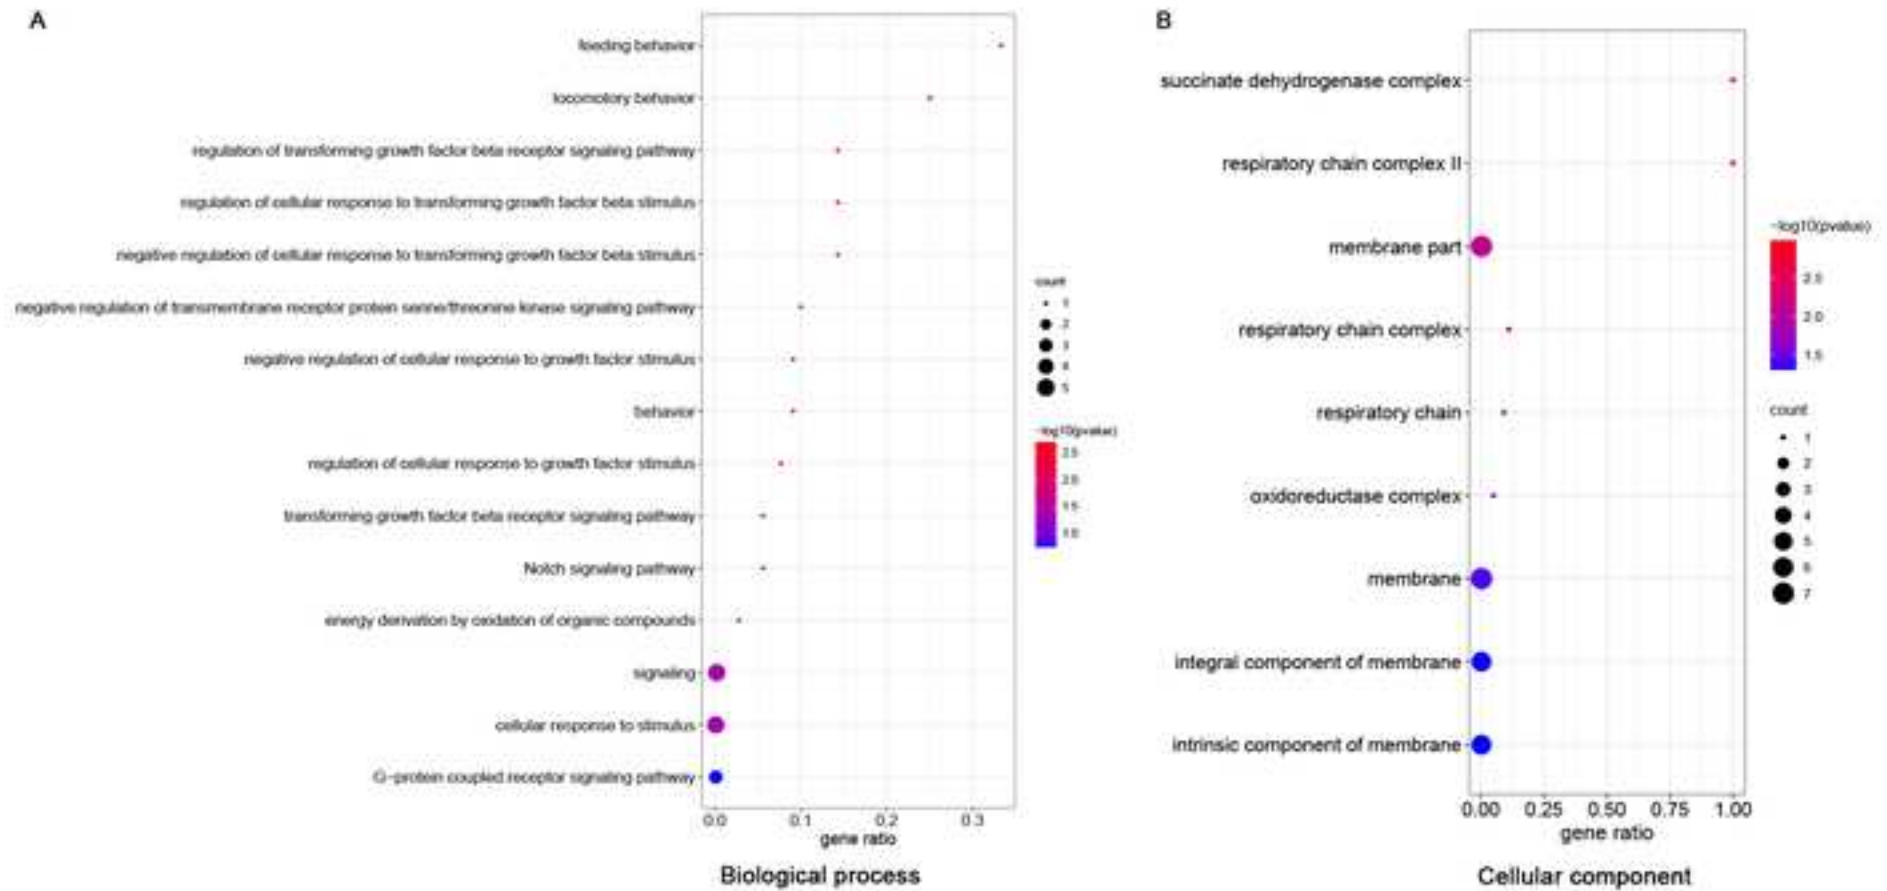



Click here to access/download  
**Supplementary Material**  
10\_circos\_plot\_data.rar







Click here to access/download  
**Supplementary Material**  
renamed\_1f2a4.docx



Supplement: giad003_giga-d-22-00016_revision_1.pdf [file giad003_giga-d-22-00016_revision_1.pdf]
