# Supplementary material for: Chromosome-level genome assembly of goose provides insight into the adaptation and growth of local goose breeds
Source: PubMed Central journal article supplement (PMC9896136; doi:10.1093/gigascience/giad003), 2023-02-03

# GigaScience

## Chromosome-level genome assembly of goose provides insight into the adaptation and growth of local goose breeds --Manuscript Draft--

|                                                      |                                                                                                                                                                                                                                                                                                                                                                                                                                                                                                                                                                                                                                                                                                                                                                                                                                                                                                                                                                                                                                                                                                                                                                                                                                                                                                                                                                                                                                                                                                                                                                                                                                                                                                           |                |
|------------------------------------------------------|-----------------------------------------------------------------------------------------------------------------------------------------------------------------------------------------------------------------------------------------------------------------------------------------------------------------------------------------------------------------------------------------------------------------------------------------------------------------------------------------------------------------------------------------------------------------------------------------------------------------------------------------------------------------------------------------------------------------------------------------------------------------------------------------------------------------------------------------------------------------------------------------------------------------------------------------------------------------------------------------------------------------------------------------------------------------------------------------------------------------------------------------------------------------------------------------------------------------------------------------------------------------------------------------------------------------------------------------------------------------------------------------------------------------------------------------------------------------------------------------------------------------------------------------------------------------------------------------------------------------------------------------------------------------------------------------------------------|----------------|
| <b>Manuscript Number:</b>                            | GIGA-D-22-00016R2                                                                                                                                                                                                                                                                                                                                                                                                                                                                                                                                                                                                                                                                                                                                                                                                                                                                                                                                                                                                                                                                                                                                                                                                                                                                                                                                                                                                                                                                                                                                                                                                                                                                                         |                |
| <b>Full Title:</b>                                   | Chromosome-level genome assembly of goose provides insight into the adaptation and growth of local goose breeds                                                                                                                                                                                                                                                                                                                                                                                                                                                                                                                                                                                                                                                                                                                                                                                                                                                                                                                                                                                                                                                                                                                                                                                                                                                                                                                                                                                                                                                                                                                                                                                           |                |
| <b>Article Type:</b>                                 | Research                                                                                                                                                                                                                                                                                                                                                                                                                                                                                                                                                                                                                                                                                                                                                                                                                                                                                                                                                                                                                                                                                                                                                                                                                                                                                                                                                                                                                                                                                                                                                                                                                                                                                                  |                |
| <b>Funding Information:</b>                          | Key Research and Development Program of Guangdong Province (2020B020222001)                                                                                                                                                                                                                                                                                                                                                                                                                                                                                                                                                                                                                                                                                                                                                                                                                                                                                                                                                                                                                                                                                                                                                                                                                                                                                                                                                                                                                                                                                                                                                                                                                               | Not applicable |
|                                                      | Construction of Modern Agricultural Science and Technology Innovation Alliance in Guangdong Province (2021KJ128, 2020KJ128)                                                                                                                                                                                                                                                                                                                                                                                                                                                                                                                                                                                                                                                                                                                                                                                                                                                                                                                                                                                                                                                                                                                                                                                                                                                                                                                                                                                                                                                                                                                                                                               | Not applicable |
|                                                      | National Modern Agricultural Industry Science and Technology Innovation Center in Guangzhou (2018kczx01)                                                                                                                                                                                                                                                                                                                                                                                                                                                                                                                                                                                                                                                                                                                                                                                                                                                                                                                                                                                                                                                                                                                                                                                                                                                                                                                                                                                                                                                                                                                                                                                                  | Not applicable |
|                                                      | Guangdong Provincial Promotion Project on Preservation and Utilization of Local Breed of Livestock and Poultry (4000-F18260)                                                                                                                                                                                                                                                                                                                                                                                                                                                                                                                                                                                                                                                                                                                                                                                                                                                                                                                                                                                                                                                                                                                                                                                                                                                                                                                                                                                                                                                                                                                                                                              | Not applicable |
|                                                      | Guangdong Basic and Applied Basic Research Foundation (2019A1515012006)                                                                                                                                                                                                                                                                                                                                                                                                                                                                                                                                                                                                                                                                                                                                                                                                                                                                                                                                                                                                                                                                                                                                                                                                                                                                                                                                                                                                                                                                                                                                                                                                                                   | Not applicable |
| <b>Abstract:</b>                                     | <p>Background: Anatidae contains numerous waterfowl species with great economic value, but the genetic diversity basis remains insufficiently investigated. Here, we report a chromosome-level genome assembly of Lion-head goose ( <i>Anser cygnoides</i> ), a native breed in South China, through the combination of PacBio, Bionano and Hi-C technologies. Findings: The assembly had a total genome size of 1.19 Gb, consisting of 1,859 contigs with an N50 length of 20.59 Mb, generating 40 pseudochromosomes, representing 97.27% of the assembled genome, and identifying 21,208 protein-coding genes. Comparative genomic analysis revealed that geese and ducks diverged approximately 28.42 million years ago, and geese have undergone massive gene family expansion and contraction. To identify genetic markers associated with body weight in different geese breeds including Wuzong goose, Huangzong goose, Magang goose and Lion-head goose, a genome-wide association study was performed, yielding an average of 1,520.6 Mb of raw data with detecting 44,858 SNPs. GWAS showed that six SNPs were significantly associated with body weight and 25 were potentially associated. The significantly associated SNPs were annotated as LDLRAD4 , GPR180 , OR , enriching in growth factor receptors regulation pathways. Conclusions: We present the first chromosome-level assembly of the Lion-head goose genome, which will expand the genomic resources of the Anatidae family, providing a basis for adaptation and evolution. Candidate genes significantly associated with different goose breeds may serve to understand the underlying mechanisms of weight differences.</p> |                |
| <b>Corresponding Author:</b>                         | Xinheng Zhang<br>South China Agricultural University<br>Guangzhou, Guangdong CHINA                                                                                                                                                                                                                                                                                                                                                                                                                                                                                                                                                                                                                                                                                                                                                                                                                                                                                                                                                                                                                                                                                                                                                                                                                                                                                                                                                                                                                                                                                                                                                                                                                        |                |
| <b>Corresponding Author Secondary Information:</b>   |                                                                                                                                                                                                                                                                                                                                                                                                                                                                                                                                                                                                                                                                                                                                                                                                                                                                                                                                                                                                                                                                                                                                                                                                                                                                                                                                                                                                                                                                                                                                                                                                                                                                                                           |                |
| <b>Corresponding Author's Institution:</b>           | South China Agricultural University                                                                                                                                                                                                                                                                                                                                                                                                                                                                                                                                                                                                                                                                                                                                                                                                                                                                                                                                                                                                                                                                                                                                                                                                                                                                                                                                                                                                                                                                                                                                                                                                                                                                       |                |
| <b>Corresponding Author's Secondary Institution:</b> |                                                                                                                                                                                                                                                                                                                                                                                                                                                                                                                                                                                                                                                                                                                                                                                                                                                                                                                                                                                                                                                                                                                                                                                                                                                                                                                                                                                                                                                                                                                                                                                                                                                                                                           |                |
| <b>First Author:</b>                                 | Qiqi Zhao                                                                                                                                                                                                                                                                                                                                                                                                                                                                                                                                                                                                                                                                                                                                                                                                                                                                                                                                                                                                                                                                                                                                                                                                                                                                                                                                                                                                                                                                                                                                                                                                                                                                                                 |                |
| <b>First Author Secondary Information:</b>           |                                                                                                                                                                                                                                                                                                                                                                                                                                                                                                                                                                                                                                                                                                                                                                                                                                                                                                                                                                                                                                                                                                                                                                                                                                                                                                                                                                                                                                                                                                                                                                                                                                                                                                           |                |

|                                                |                                                                                                                                                                                                                                                                                                                                                                                                                                                                                                                                                                                                                                                                                                                                                                                                                                                                                                                                                                                                                                                                                                                                                                                                                                                                                                                                                                                                                                                                                                                                                                                                                                                                                                                                                                                                                                         |
|------------------------------------------------|-----------------------------------------------------------------------------------------------------------------------------------------------------------------------------------------------------------------------------------------------------------------------------------------------------------------------------------------------------------------------------------------------------------------------------------------------------------------------------------------------------------------------------------------------------------------------------------------------------------------------------------------------------------------------------------------------------------------------------------------------------------------------------------------------------------------------------------------------------------------------------------------------------------------------------------------------------------------------------------------------------------------------------------------------------------------------------------------------------------------------------------------------------------------------------------------------------------------------------------------------------------------------------------------------------------------------------------------------------------------------------------------------------------------------------------------------------------------------------------------------------------------------------------------------------------------------------------------------------------------------------------------------------------------------------------------------------------------------------------------------------------------------------------------------------------------------------------------|
| <b>Order of Authors:</b>                       | <p>Qiqi Zhao</p> <p>Junpeng Chen</p> <p>Zi Xie</p> <p>Jun Wang</p> <p>Keyu Feng</p> <p>Wencheng Lin</p> <p>Hongxin Li</p> <p>Zezhong Hu</p> <p>Weiguo Chen</p> <p>Feng Chen</p> <p>Muhammad Junaid</p> <p>Huanmin Zhang</p> <p>Zhenping Lin</p> <p>Qingmei Xie</p> <p>Xinheng Zhang</p>                                                                                                                                                                                                                                                                                                                                                                                                                                                                                                                                                                                                                                                                                                                                                                                                                                                                                                                                                                                                                                                                                                                                                                                                                                                                                                                                                                                                                                                                                                                                                 |
| <b>Order of Authors Secondary Information:</b> |                                                                                                                                                                                                                                                                                                                                                                                                                                                                                                                                                                                                                                                                                                                                                                                                                                                                                                                                                                                                                                                                                                                                                                                                                                                                                                                                                                                                                                                                                                                                                                                                                                                                                                                                                                                                                                         |
| <b>Response to Reviewers:</b>                  | <p>Dear editor,</p> <p>Thank you very much for your letter dated 08 Aug 2022, and the reviewer's comments concerning our manuscript "Chromosome-level genome assembly of goose provides insight into the adaptation and growth of local goose breeds" (ID: GIGA-D-22-00016).</p> <p>These comments are of great value and very helpful for revising and improving our paper, as well as the importance guiding significant to our research. According to your opinion and request, we have made some revisions to the original manuscript. The responses to the questions are shown below, the black font part is the questions raised by the reviewers, and the dark blue font part is our reply.</p> <p>We have resubmitted the revised version in both PDF and MS word format, on the system for your review. The revised parts are marked in yellow in the MS word file of the revised manuscript for your review.</p> <p>Should you have any questions, please contact us without hesitate.</p> <p>Best wishes,<br/>Xinheng Zhang</p> <p>Questions and Responses:<br/>Reviewer #3:<br/>L44: most birds of the Anseriformes order<br/>Response: Thank you for your suggestion, we have made the changes.</p> <p>&gt;L51: warmth properties still doesn't sound right: maybe thermal (or thermic?) properties?<br/>Response: Thank you for your suggestion. We have changed it to "natural stuffing for warm clothing and bedding".</p> <p>&gt;L76: what do you mean with "continuous reference genome"?<br/>Response: Thank you for your comments. The "continuous reference genome" means that the genomic contigs obtained in this study are fewer in number and longer in sequence length than the reported assembled goose genome.</p> <p>&gt;L77-78: the link between the reference genome and the development of the goos</p> |

industry is still loose: maybe you want to say that a complete and more accurate genome would make it possible to develop better tools for good breeding (e.g. genetic markers for marker-assisted selection, genomic breeding values, precise estimates of inbreeding, relatedness matrices between individuals etc.) Is this what you have in mind?

Response: Thank you for your comments. Yes, you said what we needed to say, and we changed the original text as follows: "... and even develop better tools for breeding to promote the development of goose industry."

>L130: replace "At last" with Finally

Response: Thank you, we have made the changes.

>L139: how was the contig split? Based on which criteria? (e.g. one half aligned in one region of the genome, the other half aligned somewhere else on the genome?)

Response: Thank you for your comments. The program "hybridScaffold.pl" in the BioNano Solve package was used to merge the HERA's contig with BioNano CMAP. When there is a conflict, the program split the HERA's contig as the setting parameter of -B 1 -N2. "-B 1" means that it does not split the CMAP, and "-N 2" means that it split the contig at the conflict site. We have provided more detailed notes in the manuscript.

>L156: why do you say "polluted reads"? Do you mean contaminated samples? Do you have evidence that some of your samples were contaminated (i.e. external non-goos DNA)? uncalled nucleotides (the N's) can arise also from reading errors when generating the reads.

Response: Thank you for your comments. The "polluted reads" mean adaptor-polluted reads, but not contaminated samples. We have revised the sentence "Low-quality reads based on Phred scores, adaptor-polluted reads containing >5 adapter-polluted bases, and those containing N > 5% were trimmed, using the following parameters: LEADING:3 TRAILING:3 SLIDINGWINDOW:4:15 -threads 20 MINLEN:50" in L155-157.

>L163-164: "quality control for the assembly's quality, accuracy, and integrity was predicted": it is not clear what you predicted, please clarify (and write in better English please)

Response: Thank you for your suggestion. The gene set from the BUSCO v5.3.0 database was used to assess the confidence and completeness of the final genome assembly. A higher ratio of the mapped intact genes in the assembled genome means a higher completeness of the assembling. In addition, we have changed the word "predicted" to the more accurate word "assessed". See L163-165 for details.

>L165: at least say that you used default parameters (and add a reference to these, e.g. the online manual)

Response: Based on your suggestion, we have updated the parameters and references, with the following modifications in L166: using aves\_odb10 as the query with parameters: -l aves\_odb10 -m genome -c 5 [29, 30]. See L163-165 for details.

>L203: what is this low quality parameter? Some sort of modified Phred? (A Phred threshold of 5 would be a bit low, allowing many errors -wrong bases- in the analysis)

Response: Thank you for your comments. After checking the script, we found that the threshold parameter was set to 20, but not the default value (5). We have corrected the mistake.

>L209: maybe it is better to write "To understand relationships among groups of samples, the phylogenetic ..."

Response: Thank you for your comments. We have revised this.

>L212: corresponding BODY weight

Response: Thank you. We have corrected it.

>L213: Wald test is one of many possible statistical tests to assess the significance of SNP effects from the results of the linear regression model used for the association study

Response: Thank you. We have revised this.

|                                                                                      |                                                                                                                                                                                                                                                                                                                                                                                                                                                                                                                                                                                                                                                                                                                                                                                                                                                                                                                                                                                                                                                                                                                                                                                                                                                                                                                                                                                                                                                                                                                                                                                                                                                                                                                                                                                                                                                                                                                                                                                                                                                                                                                                                                                                                                                                                                                                                                                                                                                                                                                                                                                                                                                                                                                                                                                                                                                                                                                                                                                                                                                                                                                                                                                                                                                                                                                                                                                                                                                                                                                                                                        |
|--------------------------------------------------------------------------------------|------------------------------------------------------------------------------------------------------------------------------------------------------------------------------------------------------------------------------------------------------------------------------------------------------------------------------------------------------------------------------------------------------------------------------------------------------------------------------------------------------------------------------------------------------------------------------------------------------------------------------------------------------------------------------------------------------------------------------------------------------------------------------------------------------------------------------------------------------------------------------------------------------------------------------------------------------------------------------------------------------------------------------------------------------------------------------------------------------------------------------------------------------------------------------------------------------------------------------------------------------------------------------------------------------------------------------------------------------------------------------------------------------------------------------------------------------------------------------------------------------------------------------------------------------------------------------------------------------------------------------------------------------------------------------------------------------------------------------------------------------------------------------------------------------------------------------------------------------------------------------------------------------------------------------------------------------------------------------------------------------------------------------------------------------------------------------------------------------------------------------------------------------------------------------------------------------------------------------------------------------------------------------------------------------------------------------------------------------------------------------------------------------------------------------------------------------------------------------------------------------------------------------------------------------------------------------------------------------------------------------------------------------------------------------------------------------------------------------------------------------------------------------------------------------------------------------------------------------------------------------------------------------------------------------------------------------------------------------------------------------------------------------------------------------------------------------------------------------------------------------------------------------------------------------------------------------------------------------------------------------------------------------------------------------------------------------------------------------------------------------------------------------------------------------------------------------------------------------------------------------------------------------------------------------------------------|
|                                                                                      | <p>&gt;L213: The top 20 principal components (PCs) from the principal components analysis (PCA) of SNP variant data were used as covariates in the model used for the association study.<br/>Response: Thank you for your comments. The top 20 principal components (PCs) based on the principal components analysis (PCA) of SNP variant data were used as covariates, and subjected for the association study.</p> <p>&gt;L214: you can delete this (you already mentioned Plink, or can mention Plink at the end of the GWAS section)<br/>Response: Thank you for your suggestion. We have deleted this sentence.</p> <p>&gt;L215-216: this is written in a confused way: I suggest you reorganise the text on Plink and the command lines that you used all together in a final couple of sentences on software implementation<br/>Response: Thank you for your suggestion. We have rearranged the order of descriptions, see L214-225.</p> <p>&gt;L219: P is the body weight (you could directly write BW instead of P)<br/>Response: Thank you for your suggestion. We have replaced the "P" to "BW" in the analysis model and related information.</p> <p>&gt;L219-220: it is not clear what Z*alpha is: this seems to be the specification of a random polygenic (multigene) effect, with Z being the incidence matrix and alpha the multigene effect. This would then need an associated variance component, e.g. <math>\sigma^2_g</math> (genetic variance) with a kinship matrix (genetic relationships between individuals). However, you first mention PCs, which are used to account for population structure in GWAS, but then PCs do not appear in the specification of the GWAS model. Additionally, I don't think that you can fit a polygenic effect with a covariance matrix (mixed model) in Plink: if you did, please report the command line that you used, and which was the kinship matrix that you used as covariance (e.g. VanRaden, Astle &amp; Balding etc.)<br/>Response: Thank you for your comments. There are two types of plink correlation analysis. The analysis method with the parameter "--assoc" has no covariates and run fast, with the following parameters: --assoc --allow-extra-chr --allow-no-sex. And the other analysis sets the parameter '--linear'. First assoc analysis in plink with sample variants and corresponding weight information, i.e. asymptotic Wald test analysis. Linear analysis allows for covariates and runs slowly, using the top 20 pc's in the PCA analysis as covariates, PCA analysis with the following parameters: --pca --allow-extra-chr --allow-no-sex. And the GWAS parameters are as follows: --linear --allow-extra-chr --allow-no-sex --covar plink.eigenvec</p> <p>&gt;L222-224: Bonferroni corrects the threshold (or, equivalently, the SNP p-values) by the number of tests performed (i.e. the number of SNPs tested in GWAS). I don't understand the reference to a "further 20-fold expansion": can you please report the final threshold for significance that you obtain after all these corrections? This is needed to assess your results<br/>Response: Thank you very much for your suggestion, we have changed the unclear expression to the following: Genome-wide <math>-\log_{10}(10^{-6})</math> significance threshold was determined using the Bonferroni method. To reduce false negative, the threshold was expanded to <math>-\log_{10}(5 \cdot 10^{-8})</math> as a second threshold and the SNP in this region was defined as potentially associated.</p> |
| <b>Additional Information:</b>                                                       |                                                                                                                                                                                                                                                                                                                                                                                                                                                                                                                                                                                                                                                                                                                                                                                                                                                                                                                                                                                                                                                                                                                                                                                                                                                                                                                                                                                                                                                                                                                                                                                                                                                                                                                                                                                                                                                                                                                                                                                                                                                                                                                                                                                                                                                                                                                                                                                                                                                                                                                                                                                                                                                                                                                                                                                                                                                                                                                                                                                                                                                                                                                                                                                                                                                                                                                                                                                                                                                                                                                                                                        |
| <b>Question</b>                                                                      | <b>Response</b>                                                                                                                                                                                                                                                                                                                                                                                                                                                                                                                                                                                                                                                                                                                                                                                                                                                                                                                                                                                                                                                                                                                                                                                                                                                                                                                                                                                                                                                                                                                                                                                                                                                                                                                                                                                                                                                                                                                                                                                                                                                                                                                                                                                                                                                                                                                                                                                                                                                                                                                                                                                                                                                                                                                                                                                                                                                                                                                                                                                                                                                                                                                                                                                                                                                                                                                                                                                                                                                                                                                                                        |
| Are you submitting this manuscript to a special series or article collection?        | No                                                                                                                                                                                                                                                                                                                                                                                                                                                                                                                                                                                                                                                                                                                                                                                                                                                                                                                                                                                                                                                                                                                                                                                                                                                                                                                                                                                                                                                                                                                                                                                                                                                                                                                                                                                                                                                                                                                                                                                                                                                                                                                                                                                                                                                                                                                                                                                                                                                                                                                                                                                                                                                                                                                                                                                                                                                                                                                                                                                                                                                                                                                                                                                                                                                                                                                                                                                                                                                                                                                                                                     |
| <b>Experimental design and statistics</b>                                            | Yes                                                                                                                                                                                                                                                                                                                                                                                                                                                                                                                                                                                                                                                                                                                                                                                                                                                                                                                                                                                                                                                                                                                                                                                                                                                                                                                                                                                                                                                                                                                                                                                                                                                                                                                                                                                                                                                                                                                                                                                                                                                                                                                                                                                                                                                                                                                                                                                                                                                                                                                                                                                                                                                                                                                                                                                                                                                                                                                                                                                                                                                                                                                                                                                                                                                                                                                                                                                                                                                                                                                                                                    |
| Full details of the experimental design and statistical methods used should be given |                                                                                                                                                                                                                                                                                                                                                                                                                                                                                                                                                                                                                                                                                                                                                                                                                                                                                                                                                                                                                                                                                                                                                                                                                                                                                                                                                                                                                                                                                                                                                                                                                                                                                                                                                                                                                                                                                                                                                                                                                                                                                                                                                                                                                                                                                                                                                                                                                                                                                                                                                                                                                                                                                                                                                                                                                                                                                                                                                                                                                                                                                                                                                                                                                                                                                                                                                                                                                                                                                                                                                                        |

|                                                                                                                                                                                                                                                                                                                                                                                                                                                                                                                                                         |            |
|---------------------------------------------------------------------------------------------------------------------------------------------------------------------------------------------------------------------------------------------------------------------------------------------------------------------------------------------------------------------------------------------------------------------------------------------------------------------------------------------------------------------------------------------------------|------------|
| <p>in the Methods section, as detailed in our <a href="#">Minimum Standards Reporting Checklist</a>. Information essential to interpreting the data presented should be made available in the figure legends.</p> <p>Have you included all the information requested in your manuscript?</p>                                                                                                                                                                                                                                                            |            |
| <p><b>Resources</b></p> <p>A description of all resources used, including antibodies, cell lines, animals and software tools, with enough information to allow them to be uniquely identified, should be included in the Methods section. Authors are strongly encouraged to cite <a href="#">Research Resource Identifiers</a> (RRIDs) for antibodies, model organisms and tools, where possible.</p> <p>Have you included the information requested as detailed in our <a href="#">Minimum Standards Reporting Checklist</a>?</p>                     | <p>Yes</p> |
| <p><b>Availability of data and materials</b></p> <p>All datasets and code on which the conclusions of the paper rely must be either included in your submission or deposited in <a href="#">publicly available repositories</a> (where available and ethically appropriate), referencing such data using a unique identifier in the references and in the “Availability of Data and Materials” section of your manuscript.</p> <p>Have you have met the above requirement as detailed in our <a href="#">Minimum Standards Reporting Checklist</a>?</p> | <p>Yes</p> |

# 1 **Chromosome-level genome assembly of goose provides insight into** 2 **the adaptation and growth of local goose breeds**

3 **Qiqi Zhao<sup>1,3,5</sup>, Junpeng Chen<sup>2</sup>, Zi Xie<sup>1,3,5</sup>, Jun Wang<sup>4</sup>, Keyu Feng<sup>1,3,5</sup>, Wencheng Lin<sup>1,3,5</sup>, Hongxin**  
4 **Li<sup>1,3,5</sup>, Zezhong Hu<sup>1</sup>, Weiguo Chen<sup>1,3,5</sup>, Feng Chen<sup>1,3</sup>, Muhammad Junaid<sup>4</sup>, Huanmin Zhang<sup>6</sup>,**  
5 **Zhenping Lin<sup>2\*</sup>, Qingmei Xie<sup>1,3,5\*</sup>, Xinheng Zhang<sup>1,3,5\*</sup>**

6 <sup>1</sup>Heyuan Branch, Guangdong Provincial Laboratory of Lingnan Modern Agricultural Science and  
7 technology & Guangdong Provincial Key Lab of Agro-Animal Genomics and Molecular Breeding,  
8 College of Animal Science, South China Agricultural University, Guangzhou, Guangdong 510642,  
9 China; <sup>2</sup>Shantou Baisha Research Institute of Original Species of Poultry and Stock, Shantou,  
10 Guangdong 515000, China; <sup>3</sup>Department of Science and Technology of Guangdong Province, Key  
11 Laboratory of Animal Health Aquaculture and Environmental Control, Guangzhou, Guangdong 510642,  
12 China; <sup>4</sup>College of Marine Sciences, South China Agricultural University, Guangzhou, Guangdong,  
13 510642, China; <sup>5</sup>Guangdong Engineering Research Center for Vector Vaccine of Animal Virus,  
14 Guangzhou, 510642, China and <sup>6</sup>Avian Disease and Oncology Laboratory, Agriculture Research Service,  
15 United States Department of Agriculture, East Lansing, MI, 48823, USA

16 \* Correspondence address:

17 Zhenping Lin, Shantou Baisha Research Institute of Original Species of Poultry and Stock, Shantou,  
18 China. E-mail: Linzp02@163.com; Qingmei Xie and Xinheng Zhang, College of Animal Science, South  
19 China Agricultural University, Guangzhou, China. E-mails: qmx@scau.edu.cn (Q.X.);  
20 xhzhang@scau.edu.cn (X.Z.)

21 **running title:** Goose chromosome-level Genome Assembly

22 **Abstract**

23 **Background:** *Anatidae* contains numerous waterfowl species with great economic value, but the  
24 genetic diversity basis remains insufficiently investigated. Here, we report a chromosome-level genome  
25 assembly of Lion-head goose (*Anser cygnoides*), a native breed in South China, through the combination  
26 of PacBio, Bionano and Hi-C technologies. **Findings:** The assembly had a total genome size of 1.19 Gb,  
27 consisting of 1,859 contigs with an N50 length of 20.59 Mb, generating 40 pseudochromosomes,  
28 representing 97.27% of the assembled genome, and identifying 21,208 protein-coding genes.  
29 Comparative genomic analysis revealed that geese and ducks diverged approximately 28.42 million  
30 years ago, and geese have undergone massive gene family expansion and contraction. To identify genetic  
31 markers associated with body weight in different geese breeds including Wuzong goose, Huangzong  
32 goose, Magang goose and Lion-head goose, a genome-wide association study was performed, yielding  
33 an average of 1,520.6 Mb of raw data with detecting 44,858 SNPs. GWAS showed that six SNPs were  
34 significantly associated with body weight and 25 were potentially associated. The significantly  
35 associated SNPs were annotated as *LDLRAD4*, *GPR180*, *OR*, enriching in growth factor receptors  
36 regulation pathways. **Conclusions:** We present the first chromosome-level assembly of the Lion-head  
37 goose genome, which will expand the genomic resources of the *Anatidae* family, providing a basis for  
38 adaptation and evolution. Candidate genes significantly associated with different goose breeds may  
39 serve to understand the underlying mechanisms of weight differences.

40 **Keywords:** Lion-head goose, Genome assembly, Comparative genome, Genome-wide association study

41

## 42 Introduction

43 The *Anatidae* is a family of the ancient *Aves* class with order *Anseriformes*, containing 43 genera  
44 and 174 species, including most birds of **Anseriformes order**, such as ducks, geese, swans, and is the  
45 most prominent family of swimming birds [1]. Physical characteristics and features vary significantly  
46 among species, making the *Anatidae* family rich in diversity and specificity. *Anatidae* adults are usually  
47 herbivores, feeding on a variety of aquatic plants, which are well suited to sustainable production  
48 practices thereby reducing competition for human food; and some species are even used for crop weeds  
49 and pests control [1, 2]. For a long time, duck and goose feathers have been popular in pillows, quilts  
50 and coats [3]. Several species in the genus *Anser* are commercially important and domesticated as  
51 poultry **because of their meat-producing performance and natural stuffing for warm clothing and**  
52 **bedding**. According to archaeological evidence, geese were domesticated around 6,000 years ago near  
53 the Mediterranean Sea, and later spread around the world due to human activities [4]. It is widely  
54 believed that *Anser cygnoides* is the ancestor of the Chinese goose (*Anser cygnoides domesticus*) with a  
55 domestication history of more than 3,000 years [1]. After artificial domestication, the domestic goose  
56 has increased its cold tolerance and roughage-resistance, but its wings are degraded and weakened in  
57 flight, unable to travel long distances [1]. Egg-laying rate and goslings survival rate are also improved  
58 compared to wild swans, and the lifespan is longer [5]. Furthermore, overfeeding can cause foie gras to  
59 be at least three-fold larger than the normal size while the goose remains healthy, making the goose a  
60 good model to study human liver steatosis [6]. Chinese domestic geese is a natural gene pool containing  
61 local breeds of diverse phenotypes, and adult domestic geese from similar region vary greatly in weight  
62 [7]. For example, the Lion-head goose in Shantou (116°14'-117°19' E, 23°02'-23°38' N), Guangdong  
63 Province, can weigh more than 9 kg, while in the Wuzong goose from Qingyuan (111°55'-113°55' E,  
64 23°31'-25°12' N), Guangdong Province, the average weight is only about 3 kg [8, 9]. The Lion-head  
65 goose has a large body, a deep and wide head, and large sarcomas (five sarcomas) on the front and side  
66 of the face (**Fig. 1**). The adult male goose weighs 9-10 kg and the female goose 7.5-9 kg, grows rapidly  
67 and has rich muscles. Wuzong goose is a small goose species with a distinct band of black plumage from



68 neck to back. The gander weighs 3-3.5kg and the female weighs 2.5-3kg, with wide and short body, flat  
69 back, and thin and short feet. Magang goose is a medium-sized goose species, with a long head, wide  
70 beak, rectangular body, a gray-black bristle-like feathers on the back of the neck, gray brown breast  
71 feathers and white belly feathers. Adult weight is 4-5 kg for males and 3-4 kg for females. Huangzong  
72 goose has a compact body, from the top of the head to the back of the neck has a brownish yellow feather  
73 belt, shaped like a horse's mane. The chest feather is gray yellow, the belly feather is white, the beak and  
74 sarcoma is black. Adult males weigh 3-3.5 kg, females 2.5-3 kg. However, the mechanisms for such  
75 differences have not been clarified, let alone being resolved at the genomic level. Therefore, a complete,  
76 continuous and accurate reference genome is essential, for deciphering genomic diversity, evolutionary  
77 and adaptive processes, improving production efficiency and even develop better tools for breeding to  
78 promote the development of goose industry.

79 High-quality genome assembly sequences enable us to comprehensively and scientifically decode  
80 the genetic diversity of species, explore disease mechanisms, and understand species evolution. Recently,  
81 Pacbio has offered technology that can generate reads several thousand bases in size, and these long  
82 reads can span repetitive regions [10]. Although these long reads have a high error rate, they can be  
83 integrated with Illumina's short reads to improve sequencing accuracy [11]. In addition, new scaffolding  
84 techniques, such as high-throughput chromosome conformation capture (Hi-C), allow the genome to be  
85 assembled to the level of whole chromosomes [12]. Pacbio single molecule real-time (SMRT)  
86 sequencing technology has been extensively used in the study of human diseases such as tuberculosis  
87 and influenza virus [13], as well as in the study of species evolution, such as the centromere of the  
88 human Y chromosome [14]. Bionano optical mapping technology has advantages in obtaining highly  
89 repetitive sequences and detecting genomic structural variants, which is helpful for remote sequencing  
90 of sequence overlap clusters[15]. Bionano has become a powerful tool for genome assembly, a 5.1 Mbp  
91 inversion was found in the genomes of a patient with Duchenne muscular dystrophy[16].

92 In this study, we report the genome assembly at the chromosome level in Lion-head geese for the  
93 first time using combined data generated by four advanced technologies, Illumina, SMRT, Bionano, and  
94 Hi-C. In addition, we investigated the relationship between body weight and genetic variations in Lion-

95 head goose, Wuzong goose, Huangzong goose and Magang goose by genome-wide association analysis,  
96 trying to identify the genes involved in body weight determination from different species. These will  
97 offer valuable resources for facilitating genetic research and the improvement of the species and for  
98 studying speciation and evolution in geese.

## 99 **Methods**

### 100 **Animal selection**

101 An adult healthy purebred male Lion-head goose (*Anser cygnoides*) with classical traits was selected for  
102 whole-genome sequencing and conducting *de novo* assembly from Shantou Baisha Research Institute  
103 of Original Species of Poultry and Stock. Blood and eight tissues (i.e., brain, pharyngeal pouch, head  
104 sarcoma, spleen, liver, chest muscle, kidney, and heart) from another four healthy adult individuals were  
105 collected for RNA-seq analysis. All applicable institutional and national guidelines for the care and use  
106 of animals were followed. All the animal work in this study was approved by the South China  
107 Agricultural University Committee for Animal Experiments (approval ID: SYXK 2019-0136). All the  
108 research procedures and animal care activities were conducted based on the principles stated in the  
109 National and Institutional Guide for the Care and Use of Laboratory Animals.

### 110 **Genome survey library construction and sequencing**

111 To survey the genome profile, high-quality genomic DNA was extracted from the blood of the reference  
112 individual for whole-genome sequencing using the Qiagen Blood and Cell Culture DNA Midi Kit  
113 according to the manufacturer's instructions. For the quality control of purity, concentration, and  
114 integrity, we used Qubit 2.0 Fluorometry (Life Technologies, USA), NanoDrop 2000 spectrophotometer  
115 (Thermo Scientific), and pulse-field gel electrophoresis (Bio-rad CHEF-DR II), respectively. The  
116 following steps used for DNA extraction and quality control were similar. The short paired-end Illumina  
117 DNA library was constructed using the Illumina HiSeq system (with the paired-end 350 bp sequencing  
118 strategy). After performing the sequencing and obtaining the data, the k-mer analysis of reads for the  
119 genome survey was calculated by the Jellyfish program with the default parameters. Additionally, the  
120 genome size, heterozygosity ratio, and repeat sequence ratio were calculated with the GenomeScope

121 tool based on the k-mer frequency of 17.

## 122 **Genome sequencing and assembly strategies**

123 A 40 kb *de novo* library for SMRT genome sequencing was constructed using the PacBio Sequel III  
124 platform (Pacific Biosciences, USA). All of these reads were used for contigs assembly. A scalable and  
125 accurate long-read assembly tool, Canu (v1.8) [17], was employed to correct and assemble the PacBio  
126 reads with the listed parameters (minThreads = 4, genome size = 1200m, minOverlapLength = 700,  
127 minReadLength = 1000). The resulting contigs and corrected reads were used as inputs for HERA [18]  
128 to fill the gaps and produce longer contigs with default parameters. After that, Illumina paired-end clean  
129 data were mapped to the corrected contigs with the Burrows-Wheeler Aligner (BWA) [19], and the  
130 results were filtered by Q30 with Samtools (v1.8) [20]. **Finally, Pilon (v1.22) [21] was used to polish**  
131 **the assembly and enhance the base accuracy of the contigs.**

132 Physical optical genome maps from BioNano were used to improve the assembly quality of the  
133 genome, with the ultimate goal of generating a chromosome-scale assembly. Nuclear DNA was  
134 extracted from the blood sample of the reference individual and digested with nickase Direct Labeling  
135 Enzyme I. After labeling, repairing and staining reactions, DNA was loaded onto the Saphyr Chip for  
136 sequencing to generate BioNano molecules. Afterward, the data were assembled with RefAligner and  
137 Assembler of BioNano Solve. The scaffold was established using BioNano Solve with HERA's contigs  
138 and a BioNano genome map. **When encountering a conflict between a contig and the BioNano genome**  
139 **map, the contig was split by the program "hybridScaffold.pl" to correct the false connection.**

140 For Hi-C library, fresh blood was vacuum-infiltrated with 2% formaldehyde solution and then used  
141 for cross-link action. Later nuclear DNA was isolated from the reference animal and digested with the  
142 restriction enzyme Mbo I. The Hi-C library with insertion sizes of 350 bp was constructed and sequenced  
143 on the Illumina HiSeq X Ten instrument. The Hi-C reads were assigned to the scaffolds by Juicer [22].  
144 The scaffolds were further clustered, ordered, and oriented to the chromosome-level scaffolds by 3D-  
145 DNA [23]. Thus, a heatmap of Hi-C chromosomal interaction was created using the HiC-pro software  
146 [24].

## 147 **RNA-Seq and transcripts assembly**

148 RNA-seq was conducted on blood and eight different tissues (i.e., brain, pharyngeal pouch, head  
149 sarcoma, spleen, liver, chest muscle, kidney, and heart) from four healthy adult Lion-head goose. Total  
150 RNA was extracted from four individuals using the TRIZOL reagent and purified following the  
151 manufacturer's protocols. The concentration and quality of the isolated RNA were assessed using the  
152 Nanodrop Spectrophotometer, Qubit 2.0 Fluorometry, and the Agilent 2100 bioanalyzer (Agilent  
153 Technologies, USA). Libraries construction and sequencing were performed using the Illumina  
154 NovaSeq 6000 platform. Raw RNA-seq data with 150 bp paired-end reads were trimmed for quality  
155 using Trimmomatic [25]. Thus, the Illumina sequence adaptors were removed, then **low-quality reads**  
156 **based on Phred scores, adaptor-polluted reads containing >5 adapter-polluted bases, and those**  
157 **containing N > 5% were trimmed**, using the following parameters: LEADING:3 TRAILING:3  
158 SLIDINGWINDOW:4:15 -threads 20 MINLEN:50. Furthermore, Trinity [26] was used to *de novo*  
159 assemble the data after quality filtering. To remove redundant sequences, CD-HIT [27] was employed  
160 to remove highly identical transcript isoforms, retaining only the longest one. After filtering, the RNA-  
161 seq reads were mapped to the assembled genome using the default parameters of STAR [28].

## 162 **Assembly evaluation**

163 Finishing the genome assembly, quality control for the assembly's quality, accuracy, **and integrity was**  
164 **assessed by Benchmarking Universal Single-Copy Orthologs (BUSCO, v 5.3.0), using aves\_odb10 as**  
165 **the query with parameters: -l aves\_odb10 -m genome -c 5 [29, 30].**

## 166 **Genome annotation**

167 The genome assembly was annotated by MAKER, mainly including gene annotation and repeat  
168 annotation. The detailed pipeline was based on proteins from the Uniprot, the *de novo* assembly of RNA-  
169 seq data, and the total proteins of the relative species *Anser cygnoides* [31]. The transposable elements  
170 (TE) associated genes that were filtered out by the TEseeker database, and the results were used to  
171 conduct functional annotation using InterProScan. The repeat sequencing library was identified and  
172 annotated by a combination of LTR-FINDER and RepeatModeler. RepeatMasker and the query species  
173 "Chicken" were used to mask the repeats in the assembly, based on the Repbase database and the  
174 previous repeat sequence library. Tandem repeats were discovered by the Tandem Repeats Finder [32].

## 175 **Gene families and phylogenetic analysis**

176 Interspecific syntenic blocks between the Lion-head goose and duck were explored using MCscan [33]  
177 after coding sequence alignment by BLASTn. The same method was used for intraspecific collinearity  
178 analysis. To gain insight into the gene family evolution of the goose, we compared the gene families of  
179 Lion-head goose with the genomes of the following avian species: Zhedong white goose (*Anser*  
180 *cygnoides*), duck (*Anas platyrhynchos*), turkey (*Meleagris gallopavo*), chicken (*Gallus gallus*), pigeon  
181 (*Columba livia*), saker (*Falco cherrug*), titmouse (*Pseudopodoces humilis*), and green lizard (*Anolis*  
182 *carolinensis*). Initially, alternative splicing and genes encoding less than 50 amino acids with a  
183 proportion of stop codon greater than 20% were filtered; meanwhile, the longest transcript of genes with  
184 multiple isoforms was retained to represent the gene. Similarity relationships among the protein  
185 sequences of species were aligned by BLASTP algorithm and clustered using OrthoMCL methodology  
186 with an expansion coefficient of 1.5 to obtain single- and multiple-copy gene families, and specific gene  
187 families of Lion-head goose. The sequences of the single-copy gene families were employed to perform  
188 multiple alignments by MUSCLE. Then RAxML [34] was used to construct a phylogenetic tree of nine  
189 species, with the green lizard (*Anolis carolinensis*) being designated an outgroup. Taking the divergence  
190 time of the pigeon and turkey (92.9Mya, <http://www.timetree.org/>) as the calibration, the r8s [35]  
191 software was used to estimate the divergence time of the species and construct ultrametric trees. After  
192 filtering out gene families with gene counts of more than 100 in some individual species, CAFÉ [36]  
193 was employed to detect gene families that had undergone expansion or contraction per million years  
194 independently along each branch of the phylogenetic tree. Subsequently, a gene ontology (GO)  
195 enrichment analysis of gene families was performed using the clusterProfiler package in R [37].

## 196 **Experimental sample processing and variant detection for Genome-wide association study**

197 Blood samples of 514 geese (including Lion-head goose, Wuzong goose, Huangzong goose and Magang  
198 goose) were collected and stored in 2 mL tubes containing ACD anticoagulant for DNA extraction, and  
199 the weight of the geese was recorded. DNA was extracted from blood samples using the HiPure Blood  
200 DNA Mini Kit (Magenbio, Guangzhou, China). The samples that passed the quality testing were

201 subjected to library construction using Easy DNA Library Prep Kit (MGI, Shenzhen, China) and paired-  
202 end 100 sequencing using MGISEQ 500. Raw data were filtered for adaptors and low quality reads using  
203 SOAPnuke software, low quality threshold parameters set to 20, and the filtered sequences were  
204 compared with the constructed goose reference genome using BWA software with parameters: mem, -  
205 M. Then variant detection was performed using Samtools, GATK4 software with parameters:  
206 HaplotypeCaller -ERC GVCF. SNP variants were filtered based on a minimum allele frequency  
207 threshold of 0.05, a Hardy Weinberg equilibrium test significance threshold of  $10^{-7}$ , and a max missing  
208 rate threshold of 0.7. Principal component analysis (PCA) was performed and plotted with R. To  
209 understand relationships among groups of the samples, the phylogenetic trees were constructed using  
210 SNP data with Phylip software.

#### 211 **Genome-wide association study**

212 The genetic variation was analyzed with individual corresponding body weight information using the  
213 asymptotic Wald test (assoc) to assess the significance of SNP effects in Plink. The top 20 PCs in PCA  
214 analysis were used as covariates, and linear analysis was performed on sample variances with  
215 corresponding weight information. The statistical analysis model for genome-wide association analysis  
216 was as follows:

$$217 \quad \text{BW} = \mu + Z\alpha + \text{SNP} + e$$

218 where BW is the phenotypic variable;  $\mu$  is the intercept; Z is the random multigene effect relationship  
219 matrix;  $\alpha$  is the random multigene effect; SNP is the SNP effect determined by top 20 PCs in PCA  
220 analysis; e is the residual, distributed as  $e \sim (0, I \sigma_e)$ , and I is the unit matrix. And the common parameters  
221 in assoc and linear analysis is --allow-extra-chr --allow-no-sex -out, where the assoc parameter is -assoc  
222 and the linear parameter is --linear --covar plink.eigenvec.

223 Genome-wide  $-\log_{10}(10^{-6})$  significance threshold was determined using the Bonferroni method. To  
224 reduce false negative, the threshold was expanded to  $-\log_{10}(5^{-8})$  as a second threshold and the SNP in  
225 this region was defined as potentially associated. The SNPs with Bonferroni corrected p-values less than  
226 0.05 in the results of the assoc and linear analyses were annotated. The corresponding genes annotated  
227 with significantly related SNPs were used to identify the GO pathway.

## 228 **Selective-sweep analysis**

229 To analyze regions affected by long-term selection and are associated with domestication of geese, we  
230 calculated the Fixation indices ( $F_{ST}$ ) for four goose species using vcftools software with sliding  
231 windows length of 20 kb that had a 10-kb overlap between adjacent windows. The top 5% of regions  
232 were designated as candidate selective regions and the genes in these regions were considered as  
233 candidate genes.

## 234 **Results**

### 235 **Genome sequencing and assembly**

236 The Lion-head goose is a famous local variety in China and one of the most giant goose breeds  
237 worldwide, with a unique appearance and social benefits. Here, we attempt to construct a highly  
238 continuous chromosome-scale genome of an adult purebred male Lion-head goose with a high degree  
239 of homozygosity to minimize heterozygous alleles. The following sequencing and genome assemble  
240 strategies were applied: Illumina sequencing, Pacbio SMRT sequencing, BioNano optical mapping, and  
241 Hi-C approach (**Supplementary Table S1**). We assemble these data step by step and generate  
242 progressively improved assembled genome (**Supplementary Figure S1**). A total of 185.37 Gb of high-  
243 quality Pacbio long reads were generated, representing a  $\sim 168\times$  depth of the estimated 1.05 Gb genome  
244 with heterozygosity of 0.335% based on the k-mer analysis of the Illumina sequences (**Supplementary**  
245 **Figure S1, Supplementary Table S2**). Combing the *de novo* assembly of the Illumina and Pacbio  
246 sequences resulted in a draft genome of 1.20 Gb, yielding 1,859 contigs with a length of 13.7 Mb for  
247 contig N50 and 57.6 Mb for the longest (**Table 1**). Furthermore, with the help of BioNano optical  
248 mapping, the scaffold N50 value was increased to 37 Mb. To obtain a chromosome-scale assembly, a  
249 set of  $\sim 230$  Gb Hi-C data was used to orient, order, phase, and anchor the contigs. Approximately 97.27%  
250 of the reads assembled were anchored to 40 high-confidence pseudo-chromosomes (39 autosomes and  
251 Z chromosome) using the high-density genetic map (**Supplementary Figure S1, Fig. 2**). After polishing,  
252 we finally assembled the ultimate genome into 1.19 Gb with the final contig N50 of 20.59 Mb and  
253 scaffold N50 of 25.8 Mb, with a GC content of 42.39% (**Supplementary Table S2 and S3**). The

254 structure and quality of the assembled genome were determined by mapping a Hi-C chromosomal  
255 contact map.

256 The completeness of the Lion-head goose genome assembly was assessed using the BUSCO gene set.  
257 The result showed that almost 99.02% of the reads were correctly mapped to the genome. We then  
258 evaluated the assembled genome with 98.24% single-copy and 1.76% duplicated orthologs from the  
259 BUSCO dataset, confirming that 8,081 genes (96.92%) were intact in this genome. These results indicate  
260 the high reliability and integrity of the assembled genome (**Supplementary Figure S2 and Table S4**).

### 261 **Genome annotation**

262 To support the genome annotation, we conducted RNA-Seq analysis using RNA samples of blood and  
263 eight tissues (brain, pharyngeal pouch, head sarcoma, spleen, liver, chest muscle, kidney, and heart)  
264 from four healthy adult individuals. The aggregate of 760 Gb raw reads was accumulated by the paired-  
265 end sequencing of the 36 constructed libraries. After filtering the adaptor and low-quality sequences,  
266 723 Gb qualified Illumina reads remained, *de novo* assembled into unique transcripts (unigenes). Overall,  
267 a total of 216,229 unigenes were assembled and at the level N50, 5,082 nucleotides were obtained. Total  
268 21,208 protein-coding gene annotations were predicted in Lion-head goose by combining *de novo*  
269 prediction, homologous protein prediction, and transcription alignment. After filtering TE-related genes,  
270 a total of 21,010 protein-coding gene annotations were finally obtained by the TE seeker database (**Fig.**  
271 **2**). Furthermore, a total of 8.15% repeat sequence and 4.10% tandem repeats of the genome were  
272 detected (**Table 1**). Comparative statistics of genome quality metrics with the assembled goose genome  
273 (including Zhedong white goose, Sichuan white goose and Tianfu goose) are shown in **Table 2**.

### 274 **Phylogenetic analysis**

275 To investigate the genomic evolution of poultry, we compared the sequences of eight bird species (Lion-  
276 head goose, Zhedong white goose, duck, turkey, chicken, pigeon, saker, and titmouse) and green lizard,  
277 clustering the genes into 15,162 gene families (**Fig. 3A, Supplementary Table S5**). Among these, 6,422  
278 single-copy gene families were identified and used to construct a phylogenetic tree (**Fig. 3B**). This  
279 revealed that the geese and ducks were clustered into a subclade that probably evolved from a common



280 ancestor approximately 28.42 million years ago (Mya). As expected, the Lion-head goose displayed a  
281 close relationship with the Zhedong white goose. The divergence time between the Lion-head goose and  
282 Zhedong white goose was estimated to be 13.79 Mya, and that between chicken and turkey was nearly  
283 25.07 Mya. The above results confirmed the reliability of the tree.

284 Of all the gene families in the Lion-head goose, 4,233 gene families were significantly expanded and  
285 324 were contracted. Compared with Zhedong white goose, the Lion-head goose had more gene families  
286 and there are also more events of gene family expansion and contraction. Moreover, we mixed the gene  
287 family sets of several *Anatidae* varieties (duck, Zhedong white goose, Lion-head goose), and performed  
288 expansion and contraction analysis and corresponding GO enrichment analysis. In this task, the GO  
289 analysis of expanded gene families suggested the olfactory perception, such as detection of chemical  
290 stimulus involved in sensory perception of smell (GO:0050911,  $p = 6.97 \times 10^{-8}$ ), and odorant-binding  
291 (GO:0005549,  $p = 1.47 \times 10^{-5}$ ), both of which may be related to the adaptation of the species to find food  
292 in water (**Fig. 4A, Supplementary Table S6**). Meanwhile, contracted gene families were concentrated  
293 in the areas of glucose synthesis and metabolism, such as hexokinase activity (GO:0004396,  $p =$   
294  $7.64 \times 10^{-26}$ ), glucose binding (GO:0005536,  $p = 2.30 \times 10^{-22}$ ), cellular glucose homeostasis (GO:0001678,  
295  $p = 6.84 \times 10^{-18}$ ), glycolytic process (GO:0006096,  $p = 1.75 \times 10^{-15}$ ), hexose metabolic process  
296 (GO:0019318,  $p = 2.66 \times 10^{-14}$ ), carbohydrate phosphorylation (GO:0046835,  $p = 1.68 \times 10^{-9}$ ), and glucose  
297 6-phosphate metabolic process (GO:0051156,  $p = 1.27 \times 10^{-9}$ ), which may be closely related to  
298 characteristics of glycogen storage and utilization during migration (**Fig. 4B, Supplementary Table**  
299 **S7**). Besides, 220 unique gene families (other species lack these gene families) of the Lion-head goose  
300 were identified and functionally annotated in GO categories, such as protein kinase activity  
301 (GO:0004672,  $p = 6.85 \times 10^{-9}$ ), the regulation of apoptotic process (GO:0042981,  $p = 5.78 \times 10^{-34}$ ), the  
302 adenylate cyclase-modulating G protein-coupled receptor signaling pathway (GO:0007188,  $p =$   
303  $5.92 \times 10^{-3}$ ), and fatty-acyl-CoA reductase (alcohol-forming) activity (GO:0080019,  $p = 8.94 \times 10^{-5}$ , **Fig.**  
304 **4C, Supplementary Table S8**). Interestingly, we annotated a reproduction-related protein in the species-  
305 specific gene family, *Sterile* (Pfam ID: PF03015), acting on fatty-acyl-CoA reductase (alcohol-forming)  
306 activity, which may be related to the low reproductive rate caused by congenital infertility in geese.

307 Collinearity analysis allows one to judge molecular evolutionary events between species and explain  
308 the structural differences between the two genomes. We identified synteny blocks among avian genomes  
309 and found high collinearity between our assembly and the duck genome (genome size =1.19 Gb). Here,  
310 multiple chromosomes (Chr 1-5, 10, 12, 15, 17-20, 23, 26, 27, 29, 30, 32, 34, 36, 37, 39) of Lion-head  
311 goose were almost one-to-one collinear with those of the duck, but some chromosomal rearrangements  
312 occurred (**Fig. 3C, Supplementary Figure S3**). For example, on some chromosomes like Chr 1, 2, 3,  
313 and 4 of the duck genome, genes break and rearrange on the Lion-head goose genome, resulting in  
314 sequential inversion. In addition, some scaffolds such as Chr 9, 24, 25, 31, 35, 38 and 40, were not  
315 correlated with any chromosome of the duck genome maybe due to the different sources of genes on the  
316 chromosome. These results indicate that chromosome inversion and interchromosomal recombination  
317 may have occurred specifically in Lion-head goose during the evolutionary process, but this requires  
318 further investigation and verification. Moreover, Chr 4 of Lion-head goose was found to correspond to  
319 the sex chromosome Z of duck, except for the inversions of small patches of segments; therefore, we  
320 inferred that Chr 4 was the sex chromosome of the Lion-head goose. This information will be  
321 fundamental for comparative genomic studies in *Anatidae* animals.

### 322 **Cluster analysis of different goose species population**

323 Blood samples were collected from 514 geese (including Lion-head goose, Wuzong goose, Huangzong  
324 goose and Magang goose), and their weight was recorded, with the Lion-head goose using the minimum  
325 weight, the Wuzong goose using the maximum weight, and the Huangzong goose and Magang goose  
326 using the average weight. That is, the Lion-head goose weighed at least 9 kg, the Wuzong goose weighed  
327 at most 2.5 kg, the Huangzong goose weighed about 3-4 kg, and the Magang goose weighed 4.8-5.5 kg  
328 (**Table 6**). Blood from each sample was used for paired-end 100 resequencing. And the average raw data  
329 was 1,520.60 Mb, the average sequencing depth was 12.05×, the average coverage was 7.56%, the  
330 average matching rate was 91.31%, and 44,858 SNP loci were retained for subsequent analysis after  
331 screening SNPs with minimum allele frequency <5%, Hardy-Weinberg equilibrium test significance  
332 threshold of  $10^{-7}$ , and maximum deletion rate threshold of 0.7. We reconstructed the goose population  
333 structure using SNP data, revealing four distinct subpopulations. The PCA results demonstrated that the

334 Lion-head Goose population was clearly distinguishable from the Magang Goose, Wuzong Goose and  
335 Huangzong Goose, and there was a clear differentiation within the species (**Fig. 5A**). The clustering of  
336 Magang Goose and Huangzong Goose was closer together, probably related to their closer geographical  
337 location and the existence of some genetic exchange. The phylogenetic tree results were consistent with  
338 the PCA results. The clustering of Magang Goose and Huangzong Goose was closer to each other, and  
339 they clustered into one branch with Wuzong Goose (**Fig. 5B**).

#### 340 **Candidate genomic regions for body weight based on combined analyses of GWAS and selective-** 341 **sweep**

342 The Lion-head Goose, Huangzong Goose, Magang Goose, and Wuzong Goose are all local species  
343 in Guangdong, but they differ greatly in body weight. In this study, we sought to reveal genomic changes  
344 associated with body weight in the four goose species and screen genomic regions and genes. Selective  
345 sweep analysis was performed based on the  $F_{ST}$  index, considering the top 5% window as candidate  
346 regions. And 979 selective regions containing 818 genes were detected.

347 We then combined the GWAS results with the detected selective features to screen for candidate  
348 genomic regions responsible for the differences in goose weight. From the Manhattan plot (**Fig. 5C**), a  
349 total of 10 significant signals were found to be associated with body weight trait in geese at the genome-  
350 wide level, including one significant SNP detected on Chr 2, 8, 9, and 33 respectively ( $-\log(p) > 7.30$ ),  
351 and six significant SNPs annotated by two genes on Chr 22, with the closest Manhattan plot SNP peak  
352 on Chr 9 for the gene *OR* (Olfactory receptor). Six significant SNPs on Chr 22 are located between  
353 1,992,485 and 1,992,520 bp, a region that spans only a physical distance of 35 bp but contains six SNP  
354 loci, making it necessary to analyze these SNPs in this small region in detail to determine whether  
355 multiple QTL are involved. The most significant SNP in this region could explain about 8.19% of the  
356 phenotypic variation. Apart from significant SNPs, potentially significant QTLs were detected on many  
357 chromosomes (including Chr 2, 3, 6, 7, 10, 11, 15, 16, 20, 28, 30, 32, 36), with a total of 25 implied  
358 significant SNPs ( $4.90 < -\log(p) < 7.30$ ). On Chr 30, the suggestively significant SNPs were located  
359 between 1,258,517 and 2,422,666 bp, spanning approximately 1.16 Mb, with the most significant SNPs  
360 in this region explaining approximately 6.12% of the phenotypic variation (**Table 4**). In the present study,

361 we identified genes in the region near the significant SNPs, annotating a total of 21 genes. These genes  
362 may be important in mediating growth and development, and we inference that the *LDLRAD4* gene may  
363 play a key role in developmental plasticity in geese, while the *GPR180* gene may regulate the locomotor  
364 behavior of geese to make them stronger (**Fig. 6**). GWAS peaks overlapped with genomic regions with  
365 selective features on some chromosomes (**Supplementary Data**). This suggests that the region carrying  
366 QTL are not only associated with body weight in GWAS, but are also under selection during  
367 domestication.

## 368 **Discussion**

369 Despite the importance of the genus *Anser*, an economically important animal, the relative scarcity of  
370 genomic resources has largely hindered progress in studying genome evolution and molecular breeding  
371 in the major animals. High-quality chromosome-level genomes can provide key resources for studying.  
372 This study describes a chromosome-scale assembly of Lion-head goose obtained by a combination of  
373 data from the Illumina, SMRT, BioNano, and Hi-C platforms. The genome assembly is 1.19 Gb in length,  
374 and more than 97.27% of the assembled genome is anchored on 40 pseudo-chromosomes. The BUSCO  
375 assessment revealed 99.02% complete genes in the assembled genome, making it a better-continuity and  
376 higher-quality genome assembly than the recently published Tianfu goose genome with a contig N50 of  
377 1.85 Mb and scaffold N50 of 33.12 Mb [38]. Compared with the cultivated breed Tianfu goose, Lion-  
378 head goose, a traditional native breed, should occupy a more prominent position in the germplasm  
379 resources, and its evolving message can provide a reference for other local breeds which is worthy of  
380 in-depth study.

381 Comparative genomics is the analysis of the structural characteristics of multiple individual genomes  
382 of a species or genomes of multiple species to find out the similarities and differences of gene sequences  
383 of species with the help of bioinformatics, and then to study the gene family analysis, analyze the  
384 differentiation and evolution of species, to provide a basis for elucidating species evolution. In this study,  
385 the evolutionary events of the Lion-head goose were analyzed by comparing the genome sequences with  
386 those of other birds. The results showed that the Lion-head goose and Zhedong White goose were most

387 closely related, diverging at about 13.8 Mya, while the geese and ducks diverged at 28.4 Mya. The  
388 results were similar to those of Zhedong White goose, Sichuan White goose and Tianfu goose, indicating  
389 the accuracy of the assembly result of this study. Comparative genomic analysis revealed the genetic  
390 basis of interesting characters, which helped elucidate important biological implications and obtain  
391 solutions for genomic evolution between Lion-head geese and other species of *Anatidae* family,  
392 facilitating future genetic breeding programs. This is the first chromosomal level reference genome of  
393 Lion-head goose, providing important genomic data for the study of the family *Anatidae*.

394 The genomic information of the species population was obtained by whole-genome resequencing,  
395 and a large amount of variation information was obtained by comparison with the reference genome.  
396 Based on the correlation between differences in variation information and phenotypic differences of  
397 individuals, the adaptation of species to the environment, scanning of variant loci associated with  
398 important traits at the genome level, and localization of genetic mutations were discussed. Lion head  
399 goose, Magang goose, Huangzong goose and Wuzong goose are the main breeds of geese in Guangdong  
400 Province. Although they all belong to Guangdong Province, the body weight of adult geese varies greatly,  
401 and the molecular mechanism causing the huge difference is still unclear. In this study, four goose  
402 species were resequenced and examined for variation. Principal component analysis and phylogenetic  
403 tree analysis revealed significant differences among several goose species, indicating the feasibility of  
404 this study. Subsequently, GWAS was used to identify the candidate functional SNPs that might cause  
405 the weight difference of the four goose species, and the genes such as LDLRAD4, GPR180, and OR  
406 were analyzed and annotated, attributed to play an important role in mediating growth and development.  
407 Recently, there have been several studies related to agricultural traits that have achieved success in  
408 animal GWAS projects, for example, GWAS for improving reproductive performance and egg quality  
409 in geese and *TMEM161A* gene for embryo development [39]. Genome-wide association analysis of the  
410 early-lactation milk fat content in 3,513 Fleckvieh bulls and 2327 Holstein bulls detected 6 associated  
411 QTL regions, two of which were located near the gene DGAT1 [40]. GWAS was conducted on 225  
412 ducks with different-sized black spots, and the results showed that EDNRB2 was the gene

413 responsible for the variation in duck body surface spot size [41]. In this study, *LDLRAD4* (low-  
414 density lipoprotein receptor class A domain containing 4), *OR* (Olfactory receptor), and  
415 *GPR180* (G protein-coupled receptor 180) were mainly found to function in body weight traits.  
416 Knockdown of *LDLRAD4* enhances transforming growth factor (TGF)- $\beta$ -induced cell migration, which  
417 in turn regulates cell growth, differentiation, motility, apoptosis and matrix protein production [42]. The  
418 olfactory receptor (*OR2AT4*) has been shown to stimulate the proliferation of keratin-forming cells in  
419 peripheral human tissues [43]. *GPR180*, a component of the TGF- $\beta$  signaling pathway, also has  
420 metabolic relevance in the body and may play an essential role in regulating adipose tissue and systemic  
421 energy metabolism [44]. Here we found some correlation between these genes and the TGF- $\beta$  signaling,  
422 presumably this pathway also acts on body weight. Identifying of molecular genetic markers and the  
423 main effect QTL associated with critical agricultural traits is of great interest to breeders. Nevertheless,  
424 the candidate genes identified in this study were only detected by sequencing data and not  
425 experimentally validated. The functions of these candidate SNPs and gene markers need to be further  
426 verified by experimental results or other techniques. Thus, the findings in our GWAS study represent a  
427 valuable resource for geese and provide a new opportunity and basis for geneticists and breeders to work  
428 together to explore the genetics behind various agricultural traits.

## 429 **Conclusions**

430 In summary, we have obtained a high-quality chromosome-scale draft assembly of a purebred Lion-  
431 head goose, which provides a genetic basis for understanding the acquisition of related traits and  
432 facilitates advances in goose genomics and genetic improvement. Moreover, the candidate genes and  
433 their variants identified in this study will help clarify our understanding of goose selective breeding and  
434 the development of new breeds. The obtained genome sequence of Lion-head goose is a vital addition  
435 to the genome of genus *Anser* and is valuable for further understanding goose molecular breeding  
436 strategies. This genomic resource is also of high value for evolutionary studies of closely related species.

## 437 **Data Availability**

438 The final genome assembly data supporting the results of this article is available in the NCBI BioProject

439 repository, [Accession number: PRJNA736831]. The RNA assembly data is available in the NCBI  
440 BioProject repository, [Accession number: PRJNA807796]. The raw re-sequencing genome data  
441 supporting of the GWAS study is available in the NCBI BioProject repository [Accession number:  
442 PRJNA552198, PRJNA552383, and PRJNA552384].

#### 443 **Additional Files**

444 Supplementary Figure S1. Sequencing process and presentation.

445 Supplementary Figure S2. BUSCO assessment of the assembly genome of Lion-head goose.

446 Supplementary Figure S3. Gene synteny between the Lion-head goose and duck genomes.

447 Supplementary Table S1. Statistics of sequenced clean data.

448 Supplementary Table S2. Statistics of genome survey.

449 Supplementary Table S3. Statistics of genome assembly quality.

450 Supplementary Table S4. Summary of BUSCOs genome evaluation.

451 Supplementary Table S5: Summary of gene families from several species.

452 Supplementary Table S6. GO annotation of expanded gene families from Anatidae varieties (Duck,  
453 Zhedong white goose, Lion-head goose; Top 20).

454 Supplementary Table S7. GO annotation of contraction gene families from Anatidae varieties (Duck,  
455 Zhedong white goose, Lion-head goose; Top 20).

456 Supplementary Table S8. GO annotation of unique gene families from the Lion-head goose.

457 Supplementary Data. Significant information of selective-sweep analysis.

#### 458 **Abbreviations**

459 BLAST: Basic Local Alignment Search Tool; BWA: Burrows-Wheeler Aligner; BUSCO:  
460 Benchmarking Universal Single-Copy Orthologs; Chr: chromosome; GATK4: Genome Analysis Toolkit  
461 4; Gb: gigabase pairs; GO: gene ontology; GPR180: G protein-coupled receptor 180; GWAS: genome-  
462 wide association study; HERA: Highly Efficient Repeat Assembly; Hi-C: high-throughput chromosome  
463 conformation capture; Kb: kilobase pairs; kg: kilogram; LDLRAD4: low-density lipoprotein receptor  
464 class A domain containing 4; LTR: long terminal repeat; Mb: megabase pairs; Mya: million years ago;

465 NCBI: National Center for Biotechnology Information; OR: Olfactory receptor; OR2AT4: olfactory  
466 receptor family 2 subfamily AT member 4; PacBio: Pacific Biosciences; PCA: Principal component  
467 analysis; QTL: quantitative trait locus; RAxML: Randomized Axelerated Maximum Likelihood; RNA-  
468 seq: RNA sequencing; SMRT: single molecule real-time; SNP: single-nucleotide polymorphism; STAR:  
469 Spliced Transcripts Alignment to a Reference; TE: transposable element; TGF: transforming growth  
470 factor; TMEM161A: Transmembrane protein 161A.

### 471 **Competing Interests**

472 The authors declare that they have no conflict of interest.

### 473 **Funding**

474 This work was supported by the Key Research and Development Program of Guangdong Province  
475 (2020B020222001), the Construction of Modern Agricultural Science and Technology Innovation  
476 Alliance in Guangdong Province (2021KJ128, 2020KJ128), the National Modern Agricultural Industry  
477 Science and Technology Innovation Center in Guangzhou (2018kczx01), the Guangdong Provincial  
478 Promotion Project on Preservation and Utilization of Local Breed of Livestock and Poultry (4000-  
479 F18260), the Guangdong Basic and Applied Basic Research Foundation (2019A1515012006). The  
480 authors would like to thank the BGI in Shenzhen for their work on genome sequencing. We also thank  
481 the staff of Minglead Gene for providing the technical and computing support during the research.

### 482 **Author's Contributions**

483 Q.X., Z.L., and X.Z. conceived and designed the research. X.Z., J.C., and Q.Z. coordinated the project.  
484 J.C. and Z.L. provided animal samples. Q.Z. and Z. X. collected and prepared the samples. Q.Z.  
485 performed sequencing, assembly and bioinformatics analysis. W.L., and F.C. led work identifying  
486 genes, and H.L., W.C. aided with many aspects of gene identification and did the GO analyses. Q.Z.,  
487 X.Z. wrote and revised the manuscript and the supplementary information. J.W., M.J., Z.H., H.Z.,  
488 Z.L., and Q.X. participated in discussions and provided valuable advice. All authors read and approved  
489 the manuscript.

### 490 **References**

- 491 1. Hoyo JD, Elliott A, Sargatal J, et al. Handbook of the birds of the world. Barcelona: Lynx Edicions; 1992.
- 492 2. Madsen J, Marcussen LK, Knudsen N, et al. Does intensive goose grazing affect breeding waders? *Ecol Evol*  
493 2019;**9**(24):14512-14522. doi:10.1002/ece3.5923.
- 494 3. Wang Y, Li SM, Huang J, et al. Mutations of TYR and MITF Genes are Associated with Plumage Colour  
495 Phenotypes in Geese. *Asian-Australas J Anim Sci* 2014;**27**(6):778-83. doi:10.5713/ajas.2013.13350.
- 496 4. Gao G, Zhao X, Li Q, et al. Genome and metagenome analyses reveal adaptive evolution of the host and  
497 interaction with the gut microbiota in the goose. *Sci Rep* 2016;**6**:32961. doi:10.1038/srep32961.



- 498 5. Yao Y, Yang YZ, Gu TT, et al. Comparison of the broody behavior characteristics of different breeds of geese.  
499 *Poult Sci* 2019;**98**(11):5226-5233. doi:10.3382/ps/pez366.
- 500 6. Lu L, Chen Y, Wang Z, et al. The goose genome sequence leads to insights into the evolution of waterfowl  
501 and susceptibility to fatty liver. *Genome Biol* 2015;**16**:89. doi:10.1186/s13059-015-0652-y.
- 502 7. Li HF, Zhu WQ, Chen KW, et al. Two maternal origins of Chinese domestic goose. *Poult Sci*  
503 2011;**90**(12):2705-10. doi:10.3382/ps.2011-01425.
- 504 8. Tang J, Shen X, Ouyang H, et al. Transcriptome analysis of pituitary gland revealed candidate genes and gene  
505 networks regulating the growth and development in goose. *Anim Biotechnol* 2020:1-11.  
506 doi:10.1080/10495398.2020.1801457.
- 507 9. Zhang X, Wang J, Li X, et al. Transcriptomic investigation of embryonic pectoral muscle reveals increased  
508 myogenic processes in Shitou geese compared to Wuzong geese. *Br Poult Sci* 2021;**62**(5):650-657.  
509 doi:10.1080/00071668.2021.1912292.
- 510 10. Ardui S, Ameer A, Vermeesch JR, et al. Single molecule real-time (SMRT) sequencing comes of age:  
511 applications and utilities for medical diagnostics. *Nucleic Acids Res* 2018;**46**(5):2159-2168.  
512 doi:10.1093/nar/gky066.
- 513 11. Yoshinaga Y, Daum C, He G, et al. Genome Sequencing. *Methods Mol Biol* 2018;**1775**:37-52.  
514 doi:10.1007/978-1-4939-7804-5\_4.
- 515 12. Kong S, Zhang Y. Deciphering Hi-C: from 3D genome to function. *Cell Biol Toxicol* 2019;**35**(1):15-32.  
516 doi:10.1007/s10565-018-09456-2.
- 517 13. Nakano K, Shiroma A, Shimoji M, et al. Advantages of genome sequencing by long-read sequencer using  
518 SMRT technology in medical area. *Hum Cell* 2017;**30**(3):149-161. doi:10.1007/s13577-017-0168-8.
- 519 14. Jain M, Olsen HE, Turner DJ, et al. Linear assembly of a human centromere on the Y chromosome. *Nat*  
520 *Biotechnol* 2018;**36**(4):321-323. doi:10.1038/nbt.4109.
- 521 15. Sun L, Gao T, Wang F, et al. Chromosome-level genome assembly of a cyprinid fish *Onychostoma macrolepis*  
522 by integration of nanopore sequencing, Bionano and Hi-C technology. *Mol Ecol Resour* 2020;**20**(5):1361-  
523 1371. doi:10.1111/1755-0998.13190.
- 524 16. Bocklandt S, Hastie A, Cao H. Bionano Genome Mapping: High-Throughput, Ultra-Long Molecule Genome  
525 Analysis System for Precision Genome Assembly and Haploid-Resolved Structural Variation Discovery. *Adv*  
526 *Exp Med Biol* 2019;**1129**:97-118. doi:10.1007/978-981-13-6037-4\_7.
- 527 17. Koren S, Walenz BP, Berlin K, et al. Canu: scalable and accurate long-read assembly via adaptive k-mer  
528 weighting and repeat separation. *Genome Res* 2017;**27**(5):722-736. doi:10.1101/gr.215087.116.
- 529 18. Du H, Liang C. Assembly of chromosome-scale contigs by efficiently resolving repetitive sequences with long  
530 reads. *Nat Commun* 2019;**10**(1):5360. doi:10.1038/s41467-019-13355-3.
- 531 19. Li H, Durbin R. Fast and accurate short read alignment with Burrows-Wheeler transform. *Bioinformatics*  
532 2009;**25**(14):1754-60. doi:10.1093/bioinformatics/btp324.
- 533 20. Li H, Handsaker B, Wysoker A, et al. The Sequence Alignment/Map format and SAMtools. *Bioinformatics*  
534 2009;**25**(16):2078-9. doi:10.1093/bioinformatics/btp352.
- 535 21. Walker BJ, Abeel T, Shea T, et al. Pilon: an integrated tool for comprehensive microbial variant detection and  
536 genome assembly improvement. *Plos One* 2014;**9**(11):e112963. doi:10.1371/journal.pone.0112963.
- 537 22. Durand NC, Shamim MS, Machol I, et al. Juicer Provides a One-Click System for Analyzing Loop-Resolution  
538 Hi-C Experiments. *Cell Syst* 2016;**3**(1):95-8. doi:10.1016/j.cels.2016.07.002.
- 539 23. Dudchenko O, Batra SS, Omer AD, et al. De novo assembly of the *Aedes aegypti* genome using Hi-C yields  
540 chromosome-length scaffolds. *Science* 2017;**356**(6333):92-95. doi:10.1126/science.aal3327.
- 541 24. Servant N, Varoquaux N, Lajoie BR, et al. HiC-Pro: an optimized and flexible pipeline for Hi-C data processing.  
542 *Genome Biol* 2015;**16**(1). doi:10.1186/s13059-015-0831-x.
- 543 25. Bolger AM, Lohse M, Usadel B. Trimmomatic: a flexible trimmer for Illumina sequence data. *Bioinformatics*  
544 2014;**30**(15):2114-20. doi:10.1093/bioinformatics/btu170.
- 545 26. Grabherr MG, Haas BJ, Yassour M, et al. Full-length transcriptome assembly from RNA-Seq data without a  
546 reference genome. *Nat Biotechnol* 2011;**29**(7):644-52. doi:10.1038/nbt.1883.
- 547 27. Huang Y, Niu B, Gao Y, et al. CD-HIT Suite: a web server for clustering and comparing biological sequences.  
548 *Bioinformatics* 2010;**26**(5):680-2. doi:10.1093/bioinformatics/btq003.
- 549 28. Dobin A, Davis CA, Schlesinger F, et al. STAR: ultrafast universal RNA-seq aligner. *Bioinformatics*  
550 2013;**29**(1):15-21. doi:10.1093/bioinformatics/bts635.
- 551 29. Seppely M, Manni M, Zdobnov EM. BUSCO: Assessing Genome Assembly and Annotation Completeness.  
552 *Methods Mol Biol* 2019;**1962**:227-245. doi:10.1007/978-1-4939-9173-0\_14.
- 553 30. Manni M, Berkeley MR, Seppely M, et al. BUSCO: Assessing Genomic Data Quality and Beyond. *Curr Protoc*  
554 2021;**1**(12):e323. doi:10.1002/cpz1.323.
- 555 31. Lu L, Chen Y, Wang Z, et al. The goose genome sequence leads to insights into the evolution of waterfowl

- 556 and susceptibility to fatty liver. *Genome Biol* 2015;**16**:89. doi:10.1186/s13059-015-0652-y.
- 557 32. Benson G. Tandem repeats finder: a program to analyze DNA sequences. *Nucleic Acids Res* 1999;**27**(2):573-  
558 80. doi:10.1093/nar/27.2.573.
- 559 33. Wang Y, Tang H, Debarry JD, et al. MCScanX: a toolkit for detection and evolutionary analysis of gene  
560 synteny and collinearity. *Nucleic Acids Res* 2012;**40**(7):e49. doi:10.1093/nar/gkr1293.
- 561 34. Stamatakis A. RAxML version 8: a tool for phylogenetic analysis and post-analysis of large phylogenies.  
562 *Bioinformatics* 2014;**30**(9):1312-3. doi:10.1093/bioinformatics/btu033.
- 563 35. Sanderson MJ. r8s: inferring absolute rates of molecular evolution and divergence times in the absence of a  
564 molecular clock. *Bioinformatics* 2003;**19**(2):301-2. doi:10.1093/bioinformatics/19.2.301.
- 565 36. Han MV, Thomas GW, Lugo-Martinez J, et al. Estimating gene gain and loss rates in the presence of error in  
566 genome assembly and annotation using CAFE 3. *Mol Biol Evol* 2013;**30**(8):1987-97.  
567 doi:10.1093/molbev/mst100.
- 568 37. Yu G, Wang LG, Han Y, et al. clusterProfiler: an R package for comparing biological themes among gene  
569 clusters. *Omics* 2012;**16**(5):284-7. doi:10.1089/omi.2011.0118.
- 570 38. Li Y, Gao G, Lin Y, et al. Pacific Biosciences assembly with Hi-C mapping generates an improved,  
571 chromosome-level goose genome. *Gigascience* 2020;**9**(10). doi:10.1093/gigascience/giaa114.
- 572 39. Gao G, Gao D, Zhao X, et al. Genome-Wide Association Study-Based Identification of SNPs and Haplotypes  
573 Associated With Goose Reproductive Performance and Egg Quality. *Front Genet* 2021;**12**:602583.  
574 doi:10.3389/fgene.2021.602583.
- 575 40. Daetwyler HD, Capitan A, Pausch H, et al. Whole-genome sequencing of 234 bulls facilitates mapping of  
576 monogenic and complex traits in cattle. *Nat Genet* 2014;**46**(8):858-65. doi:10.1038/ng.3034.
- 577 41. Xi Y, Xu Q, Huang Q, et al. Genome-wide association analysis reveals that EDNRB2 causes a dose-dependent  
578 loss of pigmentation in ducks. *Bmc Genomics* 2021;**22**(1):381. doi:10.1186/s12864-021-07719-7.
- 579 42. Nakano N, Maeyama K, Sakata N, et al. C18 ORF1, a novel negative regulator of transforming growth factor-  
580 beta signaling. *J Biol Chem* 2014;**289**(18):12680-92. doi:10.1074/jbc.M114.558981.
- 581 43. Cheret J, Bertolini M, Ponce L, et al. Olfactory receptor OR2AT4 regulates human hair growth. *Nat Commun*  
582 2018;**9**(1):3624. doi:10.1038/s41467-018-05973-0.
- 583 44. Balazova L, Balaz M, Horvath C, et al. GPR180 is a component of TGFbeta signalling that promotes  
584 thermogenic adipocyte function and mediates the metabolic effects of the adipocyte-secreted factor CTHRC1.  
585 *Nat Commun* 2021;**12**(1):7144. doi:10.1038/s41467-021-27442-x.
- 586

587 **Figure legends**

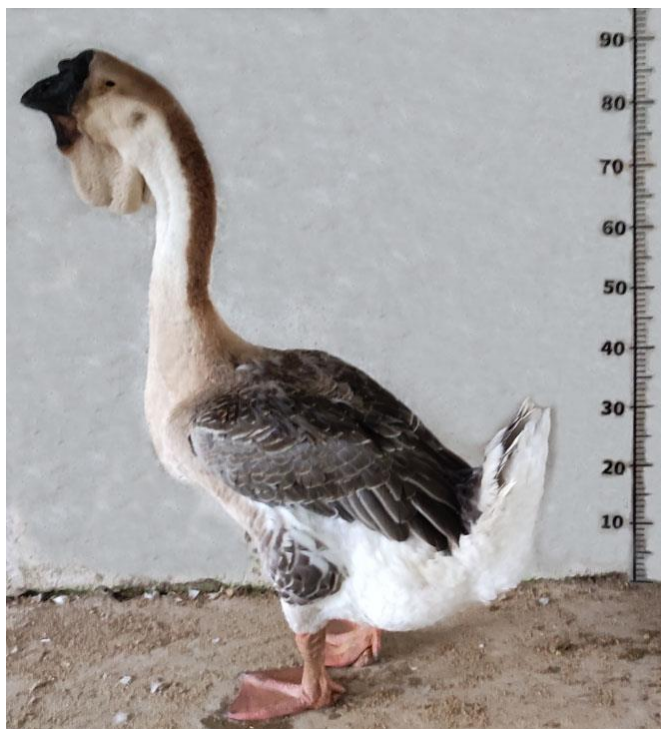

588

589 **Figure 1. A picture of a male adult Lion-head goose.**

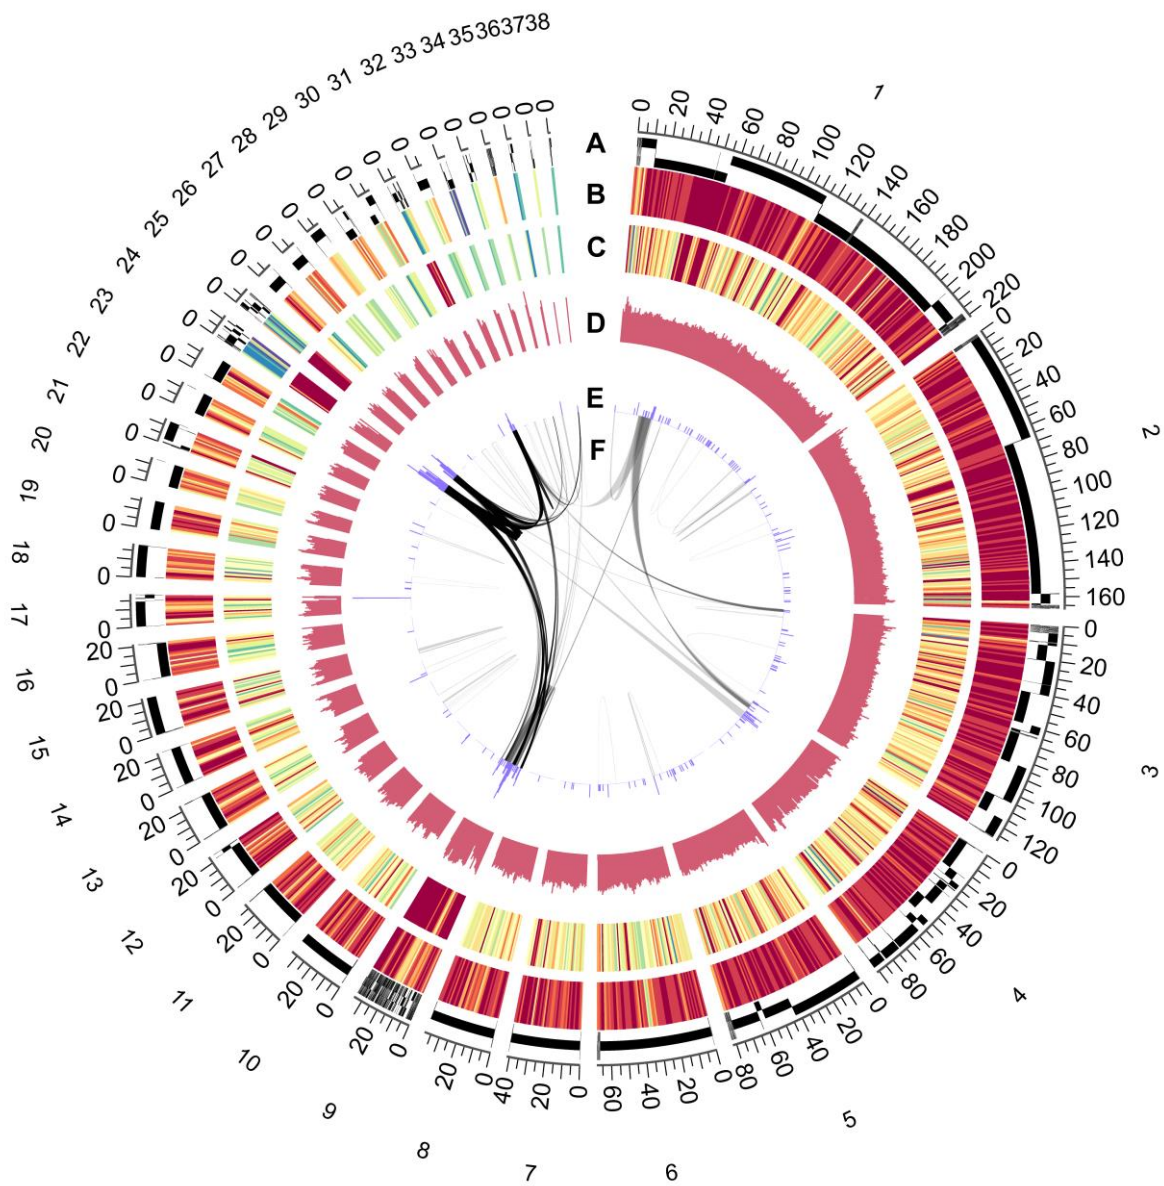

591

592 **Figure 2. Distribution of genomic features.** Concentric circle diagram presents the distribution of  
 593 genomic features of Lion-head goose using nonoverlapping sliding windows with sizes of 1 Mb (from  
 594 outmost to innermost). (A) the assembled pseudo-chromosome and the corresponding position; (B) gene  
 595 density calculated on the basis of the number of genes; (C) average expression level of overall 36  
 596 samples. eight tissues (i.e., brain, pharyngeal pouch, head sarcoma, spleen, liver, chest muscle, kidney  
 597 and heart) and blood collected from four healthy adult animals; (D) GC content; (E) density of TE; (F)  
 598 gene synteny and collinearity analysis.

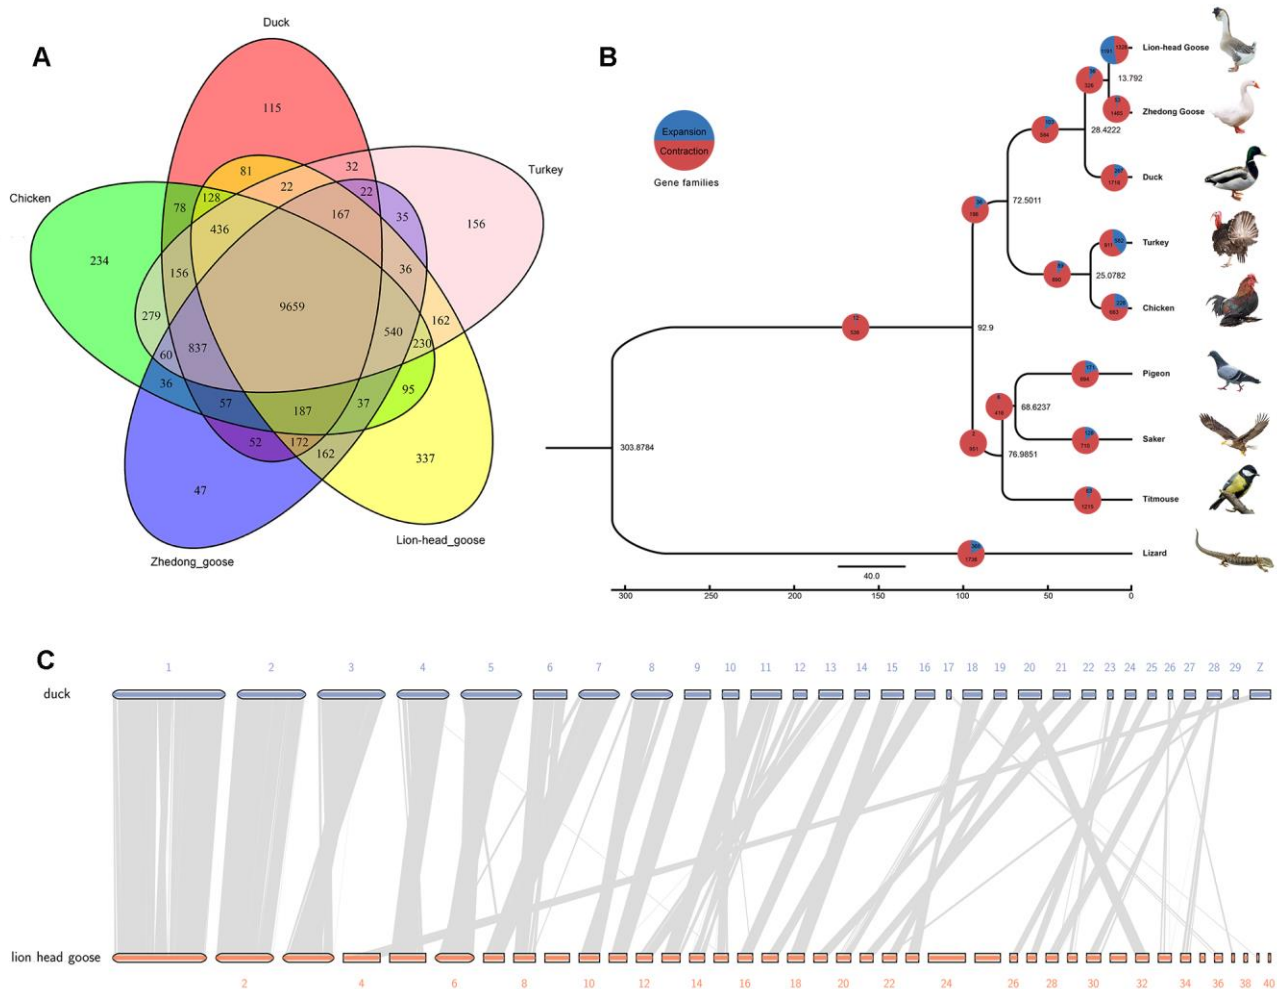

599

600 **Figure 3. Phylogenetic relationship and comparative genomics analyses.** (A) Venn diagram showing  
 601 the orthologous gene families shared among the genomes of Lion-head goose, Zhedong white goose,  
 602 chicken, duck, and turkey. (B) Phylogenetic tree with the divergence times and history of orthologous  
 603 gene families. Numbers on the nodes represent divergence times. The numbers of gene families that  
 604 expanded (green) or contracted (red) in each lineage after speciation are shown on the circles of the  
 605 corresponding branch. (C) Gene comparison of homologous chromosomes between Lion-head goose  
 606 and duck. Gray lines indicate collinearity between the genomes.

A

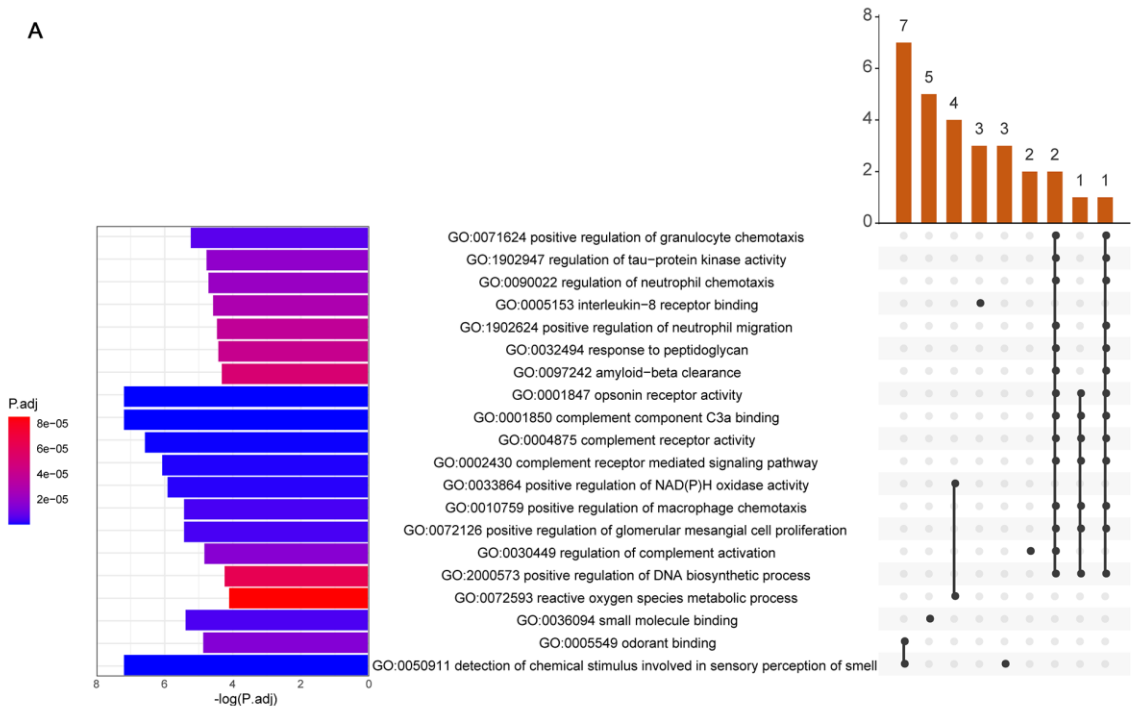

B

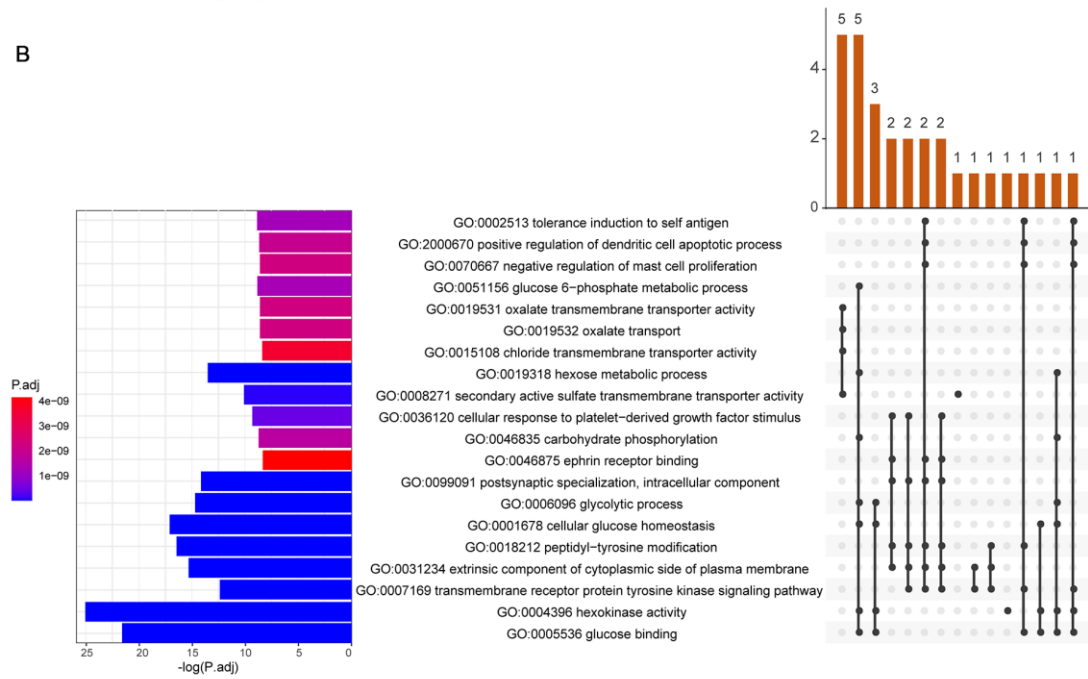

C

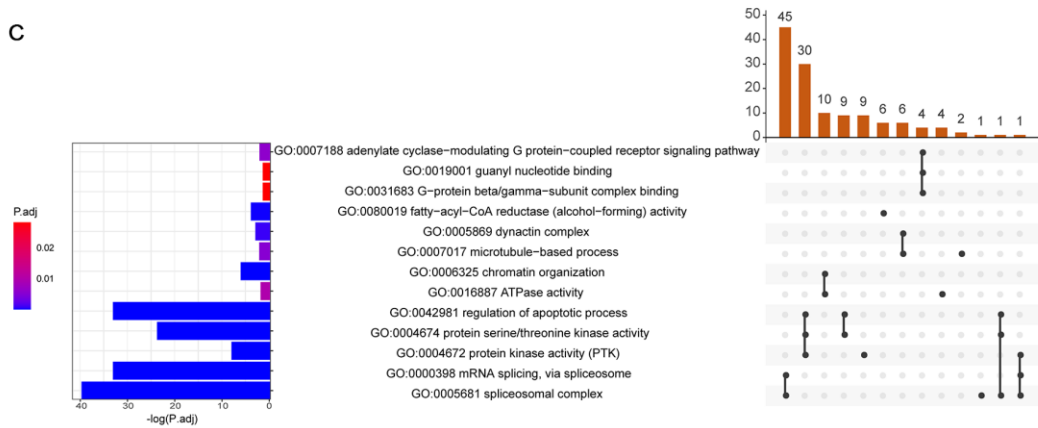

608 **Figure 4. GO enrichment analysis of gene families.** (A) Expanded and (B) contracted gene families  
609 from Anatidae varieties (duck, Zhedong white goose, Lion-head goose). (C) Unique gene families from  
610 the Lion-head goose. The bar graph on the left represents the P-adjust gradient of GO terms, and the  
611 color corresponds to the number on the x-axis (i.e.  $-\log(P.\text{adj})$ ). The bluer the color is, the smaller the  
612 P-adjust is, and the more significant it is. The redder the color is, the larger the P-adjust is, and the less  
613 significant it is. The upper right bar chart exhibits that several genes act together on the terms below.  
614 The lower right chart displays the intersection of the genes of each term; the dots connected by lines  
615 represent the intersection of multiple terms; the black dots represent “yes”, and the gray dots represent  
616 “no”.

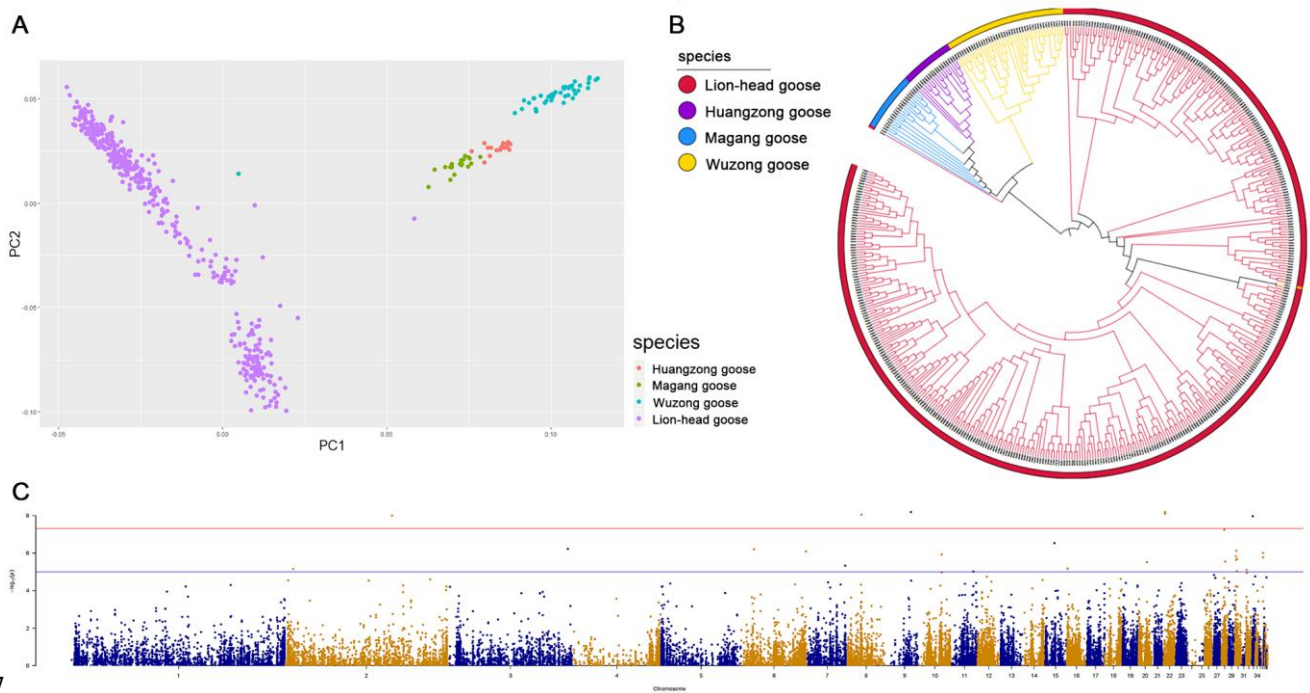

617

618 **Figure 5. Comparison of different goose species and genome-wide association analysis of body**

619 **weight. (A)** Principal component analysis of sample structures using first two principal components. **(B)**

620 The phylogenetic trees of several goose species. **(C)** Manhattan plot of genome-wide association

621 analysis for body weight. The X-axis indicates chromosomes, and Y-axis indicates the P values of the

622 SNP markers. The red solid line indicates the threshold P value for genome-wide significance. The blue

623 solid line indicates the threshold P value for the significance of potential association.



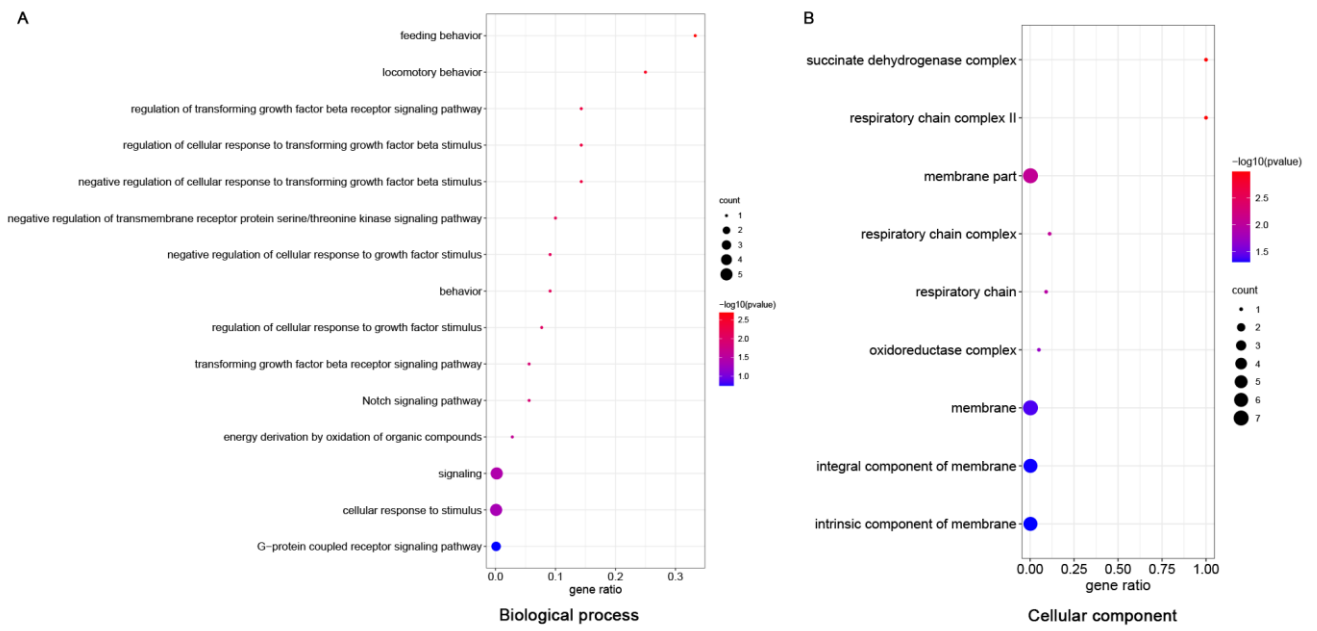

624

625 **Figure 6. GO analysis of body weight-related genes:(A) Biological processes level, (B) Cellular**

626 **component level.**

**Table 1:** Summary of repeat classification.

| Type                              | Length      | Percent |
|-----------------------------------|-------------|---------|
| Long interspersed nuclear element | 76,437,757  | 5.98    |
| Simple sequence repeats           | 23,026,311  | 1.80    |
| Low complexity                    | 4,663,288   | 0.36    |
| Tandem repeats                    | 52,426,380  | 4.10    |
| Total                             | 156,553,736 | 12.25   |

627

**Table 2:** Comparison of the present study with previous quality metrics of goose genome assembly.

| Genomic features                      | Lion-head goose | Zhedong white goose | Sichuan white goose | Tianfu goose  |
|---------------------------------------|-----------------|---------------------|---------------------|---------------|
| Estimate of genome size (bp)          | 1,278,045,811   | 1,208,661,181       | 1,198,802,839       | 1,277,099,016 |
| Total length of contigs (bp)          | 1,268,074,106   | 1,086,838,604       | 1,100,859,441       | 1,113,842,245 |
| Total length of scaffolds (bp)        | 1,277,289,474   | 1,122,178,121       | 1,130,663,797       | 1,113,913,845 |
| Number of contigs                     | 1,318           | 60,979              | 53,336              | 2,771         |
| Number of scaffolds                   | 1,266           | 1,050               | 1,837               | 2,055         |
| Contig N50 (bp)                       | 21,589,146      | 27,602              | 35,032              | 1,849,874     |
| Scaffold N50 (bp)                     | 27,064,542      | 5,202,740           | 5,103,766           | 33,116,532    |
| Longest contig (bp)                   | 91,420,268      | 201,281             | 399,111             | 10,766,871    |
| Longest scaffold (bp)                 | 98,160,899      | 24,051,356          | 20,207,557          | 70,896,740    |
| GC content                            | 42.39%          | 38.00%              | 41.68%              | 42.15%        |
| No. of predicted protein-coding genes | 21,010          | 16,150              | 16,288              | 17,568        |
| Percentage of repeat sequences        | 12.25%          | 6.33%               | 6.90%               | 8.67%         |

628

**Table 3:** Descriptive statistical of body weight traits.

| Species         | Number | Max (Kg) | Min (Kg) | Mean±SEM   |
|-----------------|--------|----------|----------|------------|
| Lion-head goose | 416    | 15.70    | 9.00     | 13.55±1.97 |
| Magang goose    | 20     | 5.50     | 4.80     | 5.32±0.36  |
| Huangzong goose | 20     | 4.30     | 2.70     | 3.40±0.83  |
| Wuzong goose    | 44     | 2.50     | 1.80     | 2.24±0.25  |

629

**Table 4:** Genome-wide association analysis of body weight in geese.

| Chr | Allele | Physical position | Regression coefficient | P value  | Genes      |
|-----|--------|-------------------|------------------------|----------|------------|
| 2   | A      | 108496954         | -0.1886                | 1.01E-08 | LDLRAD4    |
| 2   | G      | 7706165           | 0.2612                 | 6.98E-06 | LDLRAD4    |
| 3   | T      | 123032780         | -0.3979                | 6.03E-07 | EGF, KBTBD |
| 6   | A      | 13264157          | -0.24                  | 6.28E-07 | TSPAN      |
| 6   | T      | 66027192          | 0.2127                 | 8.14E-07 | IGFN1      |
| 7   | T      | 39117443          | -0.3131                | 4.66E-06 | —          |
| 8   | T      | 14712470          | 0.1865                 | 8.97E-09 | PPEF1      |
| 9   | T      | 26883582          | -2.7E+12               | 0        | OR         |
| 10  | C      | 23997415          | -0.3032                | 1.19E-06 | —          |
| 10  | C      | 23997399          | -0.2542                | 1.05E-05 | —          |

|    |   |          |         |          |                |
|----|---|----------|---------|----------|----------------|
| 10 | T | 23997401 | -0.2542 | 1.05E-05 | —              |
| 11 | A | 22838749 | 0.1548  | 9.55E-06 | —              |
| 15 | T | 10257386 | 0.2527  | 2.96E-07 | GPR180, GPCPD1 |
| 16 | A | 1477673  | -0.1892 | 6.53E-06 | —              |
| 16 | G | 1477679  | -0.1891 | 6.78E-06 | —              |
| 20 | A | 8531879  | 0.151   | 3.05E-06 | —              |
| 22 | A | 1992485  | -0.3972 | 6.51E-09 | GALNT, AUTS2   |
| 22 | A | 1992518  | -0.3973 | 7.69E-09 | GALNT, AUTS2   |
| 22 | G | 1992501  | -0.3974 | 7.94E-09 | GALNT, AUTS2   |
| 22 | C | 1992505  | -0.3974 | 7.94E-09 | GALNT, AUTS2   |
| 22 | C | 1992507  | -0.3974 | 7.94E-09 | GALNT, AUTS2   |
| 22 | G | 1992515  | -0.3974 | 7.94E-09 | GALNT, AUTS2   |
| 28 | C | 3587271  | 0.2936  | 5.81E-08 | PPP1R15B, FGD2 |
| 28 | G | 4472051  | -0.2359 | 2.82E-06 | PPP1R15B, FGD2 |
| 30 | C | 1652158  | -0.3469 | 7.53E-07 | SH2            |
| 30 | T | 1258517  | 0.2205  | 1.48E-06 | SH2            |
| 30 | G | 2422665  | 0.1894  | 2.04E-06 | SH2            |
| 30 | T | 2422666  | 0.1894  | 2.04E-06 | SH2            |
| 30 | A | 1652207  | -0.3289 | 2.3E-06  | SH2            |
| 30 | T | 2269897  | 0.211   | 9.22E-06 | SH2            |
| 32 | G | 655318   | 0.2599  | 7.95E-06 | —              |
| 33 | A | 975487   | 0.2567  | 1.07E-08 | SDHA           |
| 36 | A | 1523127  | -0.3274 | 9.86E-07 | SPRY           |
| 36 | G | 1523132  | -0.3216 | 1.7E-06  | SPRY           |
| 36 | C | 1523105  | -0.3291 | 1.72E-06 | SPRY           |

# 1 **Chromosome-level genome assembly of goose provides insight into** 2 **the adaptation and growth of local goose breeds**

3 **Qiqi Zhao<sup>1,3,5</sup>, Junpeng Chen<sup>2</sup>, Zi Xie<sup>1,3,5</sup>, Jun Wang<sup>4</sup>, Keyu Feng<sup>1,3,5</sup>, Wencheng Lin<sup>1,3,5</sup>, Hongxin**  
4 **Li<sup>1,3,5</sup>, Zezhong Hu<sup>1</sup>, Weiguo Chen<sup>1,3,5</sup>, Feng Chen<sup>1,3</sup>, Muhammad Junaid<sup>4</sup>, Huanmin Zhang<sup>6</sup>,**  
5 **Zhenping Lin<sup>2\*</sup>, Qingmei Xie<sup>1,3,5\*</sup>, Xinheng Zhang<sup>1,3,5\*</sup>**

6 <sup>1</sup>Heyuan Branch, Guangdong Provincial Laboratory of Lingnan Modern Agricultural Science and  
7 technology & Guangdong Provincial Key Lab of Agro-Animal Genomics and Molecular Breeding,  
8 College of Animal Science, South China Agricultural University, Guangzhou, Guangdong 510642,  
9 China; <sup>2</sup>Shantou Baisha Research Institute of Original Species of Poultry and Stock, Shantou,  
10 Guangdong 515000, China; <sup>3</sup>Department of Science and Technology of Guangdong Province, Key  
11 Laboratory of Animal Health Aquaculture and Environmental Control, Guangzhou, Guangdong 510642,  
12 China; <sup>4</sup>College of Marine Sciences, South China Agricultural University, Guangzhou, Guangdong,  
13 510642, China; <sup>5</sup>Guangdong Engineering Research Center for Vector Vaccine of Animal Virus,  
14 Guangzhou, 510642, China and <sup>6</sup>Avian Disease and Oncology Laboratory, Agriculture Research Service,  
15 United States Department of Agriculture, East Lansing, MI, 48823, USA

16 \* Correspondence address:

17 Zhenping Lin, Shantou Baisha Research Institute of Original Species of Poultry and Stock, Shantou,  
18 China. E-mail: Linzp02@163.com; Qingmei Xie and Xinheng Zhang, College of Animal Science, South  
19 China Agricultural University, Guangzhou, China. E-mails: qmx@scau.edu.cn (Q.X.);  
20 xhzhang@scau.edu.cn (X.Z.)

21 **running title:** Goose chromosome-level Genome Assembly

22 **Abstract**

23 **Background:** *Anatidae* contains numerous waterfowl species with great economic value, but the  
24 genetic diversity basis remains insufficiently investigated. Here, we report a chromosome-level genome  
25 assembly of Lion-head goose (*Anser cygnoides*), a native breed in South China, through the combination  
26 of PacBio, Bionano and Hi-C technologies. **Findings:** The assembly had a total genome size of 1.19 Gb,  
27 consisting of 1,859 contigs with an N50 length of 20.59 Mb, generating 40 pseudochromosomes,  
28 representing 97.27% of the assembled genome, and identifying 21,208 protein-coding genes.  
29 Comparative genomic analysis revealed that geese and ducks diverged approximately 28.42 million  
30 years ago, and geese have undergone massive gene family expansion and contraction. To identify genetic  
31 markers associated with body weight in different goose breeds including Wuzong goose, Huangzong  
32 goose, Magang goose and Lion-head goose, a genome-wide association study was performed, yielding  
33 an average of 1,520.6 Mb of raw data with detecting 44,858 SNPs. GWAS showed that six SNPs were  
34 significantly associated with body weight and 25 were potentially associated. The significantly  
35 associated SNPs were annotated as *LDLRAD4*, *GPR180*, *OR*, enriching in growth factor receptors  
36 regulation pathways. **Conclusions:** We present the first chromosome-level assembly of the Lion-head  
37 goose genome, which will expand the genomic resources of the *Anatidae* family, providing a basis for  
38 adaptation and evolution. Candidate genes significantly associated with different goose breeds may  
39 serve to understand the underlying mechanisms of weight differences.

40 **Keywords:** Lion-head goose, Genome assembly, Comparative genome, Genome-wide association study

41

## 42 Introduction

43 The *Anatidae* is a family of the ancient *Aves* class with order *Anseriformes*, containing 43 genera  
44 and 174 species, including most birds of *Anseriformes* order, such as ducks, geese, swans, and is the  
45 most prominent family of swimming birds [1]. Physical characteristics and features vary significantly  
46 among species, making the *Anatidae* family rich in diversity and specificity. *Anatidae* adults are usually  
47 herbivores, feeding on a variety of aquatic plants, which are well suited to sustainable production  
48 practices thereby reducing competition for human food; and some species are even used for crop weeds  
49 and pests control [1, 2]. For a long time, duck and goose feathers have been popular in pillows, quilts  
50 and coats [3]. Several species in the genus *Anser* are commercially important and domesticated as  
51 poultry because of their meat-producing performance and natural stuffing for warm clothing and  
52 bedding. According to archaeological evidence, geese were domesticated around 6,000 years ago near  
53 the Mediterranean Sea, and later spread around the world due to human activities [4]. It is widely  
54 believed that *Anser cygnoides* is the ancestor of the Chinese goose (*Anser cygnoides domesticus*) with a  
55 domestication history of more than 3,000 years [1]. After artificial domestication, the domestic goose  
56 has increased its cold tolerance and roughage-resistance, but its wings are degraded and weakened in  
57 flight, unable to travel long distances [1]. Egg-laying rate and goslings survival rate are also improved  
58 compared to wild swans, and the lifespan is longer [5]. Furthermore, overfeeding can cause foie gras to  
59 be at least three-fold larger than the normal size while the goose remains healthy, making the goose a  
60 good model to study human liver steatosis [6]. Chinese domestic geese is a natural gene pool containing  
61 local breeds of diverse phenotypes, and adult domestic geese from similar region vary greatly in weight  
62 [7]. For example, the Lion-head goose in Shantou (116°14'-117°19' E, 23°02'-23°38' N), Guangdong  
63 Province, can weigh more than 9 kg, while in the Wuzong goose from Qingyuan (111°55'-113°55' E,  
64 23°31'-25°12' N), Guangdong Province, the average weight is only about 3 kg [8, 9]. The Lion-head  
65 goose has a large body, a deep and wide head, and large sarcomas (five sarcomas) on the front and side  
66 of the face (**Fig. 1**). The adult male goose weighs 9-10 kg and the female goose 7.5-9 kg, grows rapidly  
67 and has rich muscles. Wuzong goose is a small goose species with a distinct band of black plumage from

68 neck to back. The gander weighs 3-3.5kg and the female weighs 2.5-3kg, with wide and short body, flat  
69 back, and thin and short feet. Magang goose is a medium-sized goose species, with a long head, wide  
70 beak, rectangular body, a gray-black bristle-like feathers on the back of the neck, gray brown breast  
71 feathers and white belly feathers. Adult weight is 4-5 kg for males and 3-4 kg for females. Huangzong  
72 goose has a compact body, from the top of the head to the back of the neck has a brownish yellow feather  
73 belt, shaped like a horse's mane. The chest feather is gray yellow, the belly feather is white, the beak and  
74 sarcoma is black. Adult males weigh 3-3.5 kg, females 2.5-3 kg. However, the mechanisms for such  
75 differences have not been clarified, let alone being resolved at the genomic level. Therefore, a complete,  
76 continuous and accurate reference genome is essential, for deciphering genomic diversity, evolutionary  
77 and adaptive processes, improving production efficiency and even develop better tools for breeding to  
78 promote the development of goose industry.

79 High-quality genome assembly sequences enable us to comprehensively and scientifically decode  
80 the genetic diversity of species, explore disease mechanisms, and understand species evolution. Recently,  
81 Pacbio has offered technology that can generate reads several thousand bases in size, and these long  
82 reads can span repetitive regions [10]. Although these long reads have a high error rate, they can be  
83 integrated with Illumina's short reads to improve sequencing accuracy [11]. In addition, new scaffolding  
84 techniques, such as high-throughput chromosome conformation capture (Hi-C), allow the genome to be  
85 assembled to the level of whole chromosomes [12]. Pacbio single molecule real-time (SMRT)  
86 sequencing technology has been extensively used in the study of human diseases such as tuberculosis  
87 and influenza virus [13], as well as in the study of species evolution, such as the centromere of the  
88 human Y chromosome [14]. Bionano optical mapping technology has advantages in obtaining highly  
89 repetitive sequences and detecting genomic structural variants, which is helpful for remote sequencing  
90 of sequence overlap clusters[15]. Bionano has become a powerful tool for genome assembly, a 5.1 Mbp  
91 inversion was found in the genomes of a patient with Duchenne muscular dystrophy[16].

92 In this study, we report the genome assembly at the chromosome level in Lion-head geese for the  
93 first time using combined data generated by four advanced technologies, Illumina, SMRT, Bionano, and  
94 Hi-C. In addition, we investigated the relationship between body weight and genetic variations in Lion-

95 head goose, Wuzong goose, Huangzong goose and Magang goose by genome-wide association analysis,  
96 trying to identify the genes involved in body weight determination from different species. These will  
97 offer valuable resources for facilitating genetic research and the improvement of the species and for  
98 studying speciation and evolution in geese.

## 99 **Methods**

### 100 **Animal selection**

101 An adult healthy purebred male Lion-head goose (*Anser cygnoides*) with classical traits was selected for  
102 whole-genome sequencing and conducting *de novo* assembly from Shantou Baisha Research Institute  
103 of Original Species of Poultry and Stock. Blood and eight tissues (i.e., brain, pharyngeal pouch, head  
104 sarcoma, spleen, liver, chest muscle, kidney, and heart) from another four healthy adult individuals were  
105 collected for RNA-seq analysis. All applicable institutional and national guidelines for the care and use  
106 of animals were followed. All the animal work in this study was approved by the South China  
107 Agricultural University Committee for Animal Experiments (approval ID: SYXK 2019-0136). All the  
108 research procedures and animal care activities were conducted based on the principles stated in the  
109 National and Institutional Guide for the Care and Use of Laboratory Animals.

### 110 **Genome survey library construction and sequencing**

111 To survey the genome profile, high-quality genomic DNA was extracted from the blood of the reference  
112 individual for whole-genome sequencing using the Qiagen Blood and Cell Culture DNA Midi Kit  
113 according to the manufacturer's instructions. For the quality control of purity, concentration, and  
114 integrity, we used Qubit 2.0 Fluorometry (Life Technologies, USA), NanoDrop 2000 spectrophotometer  
115 (Thermo Scientific), and pulse-field gel electrophoresis (Bio-rad CHEF-DR II), respectively. The  
116 following steps used for DNA extraction and quality control were similar. The short paired-end Illumina  
117 DNA library was constructed using the Illumina HiSeq system (with the paired-end 350 bp sequencing  
118 strategy). After performing the sequencing and obtaining the data, the k-mer analysis of reads for the  
119 genome survey was calculated by the Jellyfish program with the default parameters. Additionally, the  
120 genome size, heterozygosity ratio, and repeat sequence ratio were calculated with the GenomeScope



121 tool based on the k-mer frequency of 17.

## 122 **Genome sequencing and assembly strategies**

123 A 40 kb *de novo* library for SMRT genome sequencing was constructed using the PacBio Sequel III  
124 platform (Pacific Biosciences, USA). All of these reads were used for contigs assembly. A scalable and  
125 accurate long-read assembly tool, Canu (v1.8) [17], was employed to correct and assemble the PacBio  
126 reads with the listed parameters (minThreads = 4, genome size = 1200m, minOverlapLength = 700,  
127 minReadLength = 1000). The resulting contigs and corrected reads were used as inputs for HERA [18]  
128 to fill the gaps and produce longer contigs with default parameters. After that, Illumina paired-end clean  
129 data were mapped to the corrected contigs with the Burrows-Wheeler Aligner (BWA) [19], and the  
130 results were filtered by Q30 with Samtools (v1.8) [20]. **Finally, Pilon (v1.22) [21] was used to polish**  
131 **the assembly and enhance the base accuracy of the contigs.**

132 Physical optical genome maps from BioNano were used to improve the assembly quality of the  
133 genome, with the ultimate goal of generating a chromosome-scale assembly. Nuclear DNA was  
134 extracted from the blood sample of the reference individual and digested with nickase Direct Labeling  
135 Enzyme I. After labeling, repairing and staining reactions, DNA was loaded onto the Saphyr Chip for  
136 sequencing to generate BioNano molecules. Afterward, the data were assembled with RefAligner and  
137 Assembler of BioNano Solve. The scaffold was established using BioNano Solve with HERA's contigs  
138 and a BioNano genome map. **When encountering a conflict between a contig and the BioNano genome**  
139 **map, the contig was split by the program "hybridScaffold.pl" to correct the false connection.**

140 For Hi-C library, fresh blood was vacuum-infiltrated with 2% formaldehyde solution and then used  
141 for cross-link action. Later nuclear DNA was isolated from the reference animal and digested with the  
142 restriction enzyme Mbo I. The Hi-C library with insertion sizes of 350 bp was constructed and sequenced  
143 on the Illumina HiSeq X Ten instrument. The Hi-C reads were assigned to the scaffolds by Juicer [22].  
144 The scaffolds were further clustered, ordered, and oriented to the chromosome-level scaffolds by 3D-  
145 DNA [23]. Thus, a heatmap of Hi-C chromosomal interaction was created using the HiC-pro software  
146 [24].

## 147 **RNA-Seq and transcripts assembly**

148 RNA-seq was conducted on blood and eight different tissues (i.e., brain, pharyngeal pouch, head  
149 sarcoma, spleen, liver, chest muscle, kidney, and heart) from four healthy adult Lion-head goose. Total  
150 RNA was extracted from four individuals using the TRIZOL reagent and purified following the  
151 manufacturer's protocols. The concentration and quality of the isolated RNA were assessed using the  
152 Nanodrop Spectrophotometer, Qubit 2.0 Fluorometry, and the Agilent 2100 bioanalyzer (Agilent  
153 Technologies, USA). Libraries construction and sequencing were performed using the Illumina  
154 NovaSeq 6000 platform. Raw RNA-seq data with 150 bp paired-end reads were trimmed for quality  
155 using Trimmomatic [25]. Thus, the Illumina sequence adaptors were removed, then **low-quality reads**  
156 **based on Phred scores, adaptor-polluted reads containing >5 adapter-polluted bases, and those**  
157 **containing N > 5% were trimmed**, using the following parameters: LEADING:3 TRAILING:3  
158 SLIDINGWINDOW:4:15 -threads 20 MINLEN:50. Furthermore, Trinity [26] was used to *de novo*  
159 assemble the data after quality filtering. To remove redundant sequences, CD-HIT [27] was employed  
160 to remove highly identical transcript isoforms, retaining only the longest one. After filtering, the RNA-  
161 seq reads were mapped to the assembled genome using the default parameters of STAR [28].

## 162 **Assembly evaluation**

163 Finishing the genome assembly, quality control for the assembly's quality, accuracy, **and integrity was**  
164 **assessed by Benchmarking Universal Single-Copy Orthologs (BUSCO, v 5.3.0), using aves\_odb10 as**  
165 **the query with parameters: -l aves\_odb10 -m genome -c 5 [29, 30].**

## 166 **Genome annotation**

167 The genome assembly was annotated by MAKER, mainly including gene annotation and repeat  
168 annotation. The detailed pipeline was based on proteins from the Uniprot, the *de novo* assembly of RNA-  
169 seq data, and the total proteins of the relative species *Anser cygnoides* [31]. The transposable elements  
170 (TE) associated genes that were filtered out by the TEseeker database, and the results were used to  
171 conduct functional annotation using InterProScan. The repeat sequencing library was identified and  
172 annotated by a combination of LTR-FINDER and RepeatModeler. RepeatMasker and the query species  
173 "Chicken" were used to mask the repeats in the assembly, based on the Repbase database and the  
174 previous repeat sequence library. Tandem repeats were discovered by the Tandem Repeats Finder [32].

## 175 **Gene families and phylogenetic analysis**

176 Interspecific syntenic blocks between the Lion-head goose and duck were explored using MCscan [33]  
177 after coding sequence alignment by BLASTn. The same method was used for intraspecific collinearity  
178 analysis. To gain insight into the gene family evolution of the goose, we compared the gene families of  
179 Lion-head goose with the genomes of the following avian species: Zhedong white goose (*Anser*  
180 *cygnoides*), duck (*Anas platyrhynchos*), turkey (*Meleagris gallopavo*), chicken (*Gallus gallus*), pigeon  
181 (*Columba livia*), saker (*Falco cherrug*), titmouse (*Pseudopodoces humilis*), and green lizard (*Anolis*  
182 *carolinensis*). Initially, alternative splicing and genes encoding less than 50 amino acids with a  
183 proportion of stop codon greater than 20% were filtered; meanwhile, the longest transcript of genes with  
184 multiple isoforms was retained to represent the gene. Similarity relationships among the protein  
185 sequences of species were aligned by BLASTP algorithm and clustered using OrthoMCL methodology  
186 with an expansion coefficient of 1.5 to obtain single- and multiple-copy gene families, and specific gene  
187 families of Lion-head goose. The sequences of the single-copy gene families were employed to perform  
188 multiple alignments by MUSCLE. Then RAxML [34] was used to construct a phylogenetic tree of nine  
189 species, with the green lizard (*Anolis carolinensis*) being designated an outgroup. Taking the divergence  
190 time of the pigeon and turkey (92.9Mya, <http://www.timetree.org/>) as the calibration, the r8s [35]  
191 software was used to estimate the divergence time of the species and construct ultrametric trees. After  
192 filtering out gene families with gene counts of more than 100 in some individual species, CAFÉ [36]  
193 was employed to detect gene families that had undergone expansion or contraction per million years  
194 independently along each branch of the phylogenetic tree. Subsequently, a gene ontology (GO)  
195 enrichment analysis of gene families was performed using the clusterProfiler package in R [37].

## 196 **Experimental sample processing and variant detection for Genome-wide association study**

197 Blood samples of 514 geese (including Lion-head goose, Wuzong goose, Huangzong goose and Magang  
198 goose) were collected and stored in 2 mL tubes containing ACD anticoagulant for DNA extraction, and  
199 the weight of the geese was recorded. DNA was extracted from blood samples using the HiPure Blood  
200 DNA Mini Kit (Magenbio, Guangzhou, China). The samples that passed the quality testing were

201 subjected to library construction using Easy DNA Library Prep Kit (MGI, Shenzhen, China) and paired-  
202 end 100 sequencing using MGISEQ 500. Raw data were filtered for adaptors and low quality reads using  
203 SOAPnuke software, low quality threshold parameters set to 20, and the filtered sequences were  
204 compared with the constructed goose reference genome using BWA software with parameters: mem, -  
205 M. Then variant detection was performed using Samtools, GATK4 software with parameters:  
206 HaplotypeCaller -ERC GVCF. SNP variants were filtered based on a minimum allele frequency  
207 threshold of 0.05, a Hardy Weinberg equilibrium test significance threshold of  $10^{-7}$ , and a max missing  
208 rate threshold of 0.7. Principal component analysis (PCA) was performed and plotted with R. To  
209 understand relationships among groups of the samples, the phylogenetic trees were constructed using  
210 SNP data with Phylip software.

### 211 **Genome-wide association study**

212 The genetic variation was analyzed with individual corresponding body weight information using the  
213 asymptotic Wald test (assoc) to assess the significance of SNP effects in Plink. The top 20 PCs in PCA  
214 analysis were used as covariates, and linear analysis was performed on sample variances with  
215 corresponding weight information. The statistical analysis model for genome-wide association analysis  
216 was as follows:

$$217 \quad \text{BW} = \mu + Z\alpha + \text{SNP} + e$$

218 where BW is the phenotypic variable;  $\mu$  is the intercept; Z is the random multigene effect relationship  
219 matrix;  $\alpha$  is the random multigene effect; SNP is the SNP effect determined by top 20 PCs in PCA  
220 analysis; e is the residual, distributed as  $e \sim (0, I \sigma_e)$ , and I is the unit matrix. And the common parameters  
221 in assoc and linear analysis is --allow-extra-chr --allow-no-sex -out, where the assoc parameter is --assoc  
222 and the linear parameter is --linear --covar plink.eigenvec.

223 Genome-wide  $-\log_{10}(10^{-6})$  significance threshold was determined using the Bonferroni method. To  
224 reduce false negative, the threshold was expanded to  $-\log_{10}(5^{-8})$  as a second threshold and the SNP in  
225 this region was defined as potentially associated. The SNPs with Bonferroni corrected p-values less than  
226 0.05 in the results of the assoc and linear analyses were annotated. The corresponding genes annotated  
227 with significantly related SNPs were used to identify the GO pathway.

## 228 **Selective-sweep analysis**

229 To analyze regions affected by long-term selection and are associated with domestication of geese, we  
230 calculated the Fixation indices ( $F_{ST}$ ) for four goose species using vcftools software with sliding  
231 windows length of 20 kb that had a 10-kb overlap between adjacent windows. The top 5% of regions  
232 were designated as candidate selective regions and the genes in these regions were considered as  
233 candidate genes.

## 234 **Results**

### 235 **Genome sequencing and assembly**

236 The Lion-head goose is a famous local variety in China and one of the most giant goose breeds  
237 worldwide, with a unique appearance and social benefits. Here, we attempt to construct a highly  
238 continuous chromosome-scale genome of an adult purebred male Lion-head goose with a high degree  
239 of homozygosity to minimize heterozygous alleles. The following sequencing and genome assemble  
240 strategies were applied: Illumina sequencing, Pacbio SMRT sequencing, BioNano optical mapping, and  
241 Hi-C approach (**Supplementary Table S1**). We assemble these data step by step and generate  
242 progressively improved assembled genome (**Supplementary Figure S1**). A total of 185.37 Gb of high-  
243 quality Pacbio long reads were generated, representing a  $\sim 168\times$  depth of the estimated 1.05 Gb genome  
244 with heterozygosity of 0.335% based on the k-mer analysis of the Illumina sequences (**Supplementary**  
245 **Figure S1, Supplementary Table S2**). Combing the *de novo* assembly of the Illumina and Pacbio  
246 sequences resulted in a draft genome of 1.20 Gb, yielding 1,859 contigs with a length of 13.7 Mb for  
247 contig N50 and 57.6 Mb for the longest (**Table 1**). Furthermore, with the help of BioNano optical  
248 mapping, the scaffold N50 value was increased to 37 Mb. To obtain a chromosome-scale assembly, a  
249 set of  $\sim 230$  Gb Hi-C data was used to orient, order, phase, and anchor the contigs. Approximately 97.27%  
250 of the reads assembled were anchored to 40 high-confidence pseudo-chromosomes (39 autosomes and  
251 Z chromosome) using the high-density genetic map (**Supplementary Figure S1, Fig. 2**). After polishing,  
252 we finally assembled the ultimate genome into 1.19 Gb with the final contig N50 of 20.59 Mb and  
253 scaffold N50 of 25.8 Mb, with a GC content of 42.39% (**Supplementary Table S2 and S3**). The

254 structure and quality of the assembled genome were determined by mapping a Hi-C chromosomal  
255 contact map.

256 The completeness of the Lion-head goose genome assembly was assessed using the BUSCO gene set.  
257 The result showed that almost 99.02% of the reads were correctly mapped to the genome. We then  
258 evaluated the assembled genome with 98.24% single-copy and 1.76% duplicated orthologs from the  
259 BUSCO dataset, confirming that 8,081 genes (96.92%) were intact in this genome. These results indicate  
260 the high reliability and integrity of the assembled genome (**Supplementary Figure S2 and Table S4**).

### 261 **Genome annotation**

262 To support the genome annotation, we conducted RNA-Seq analysis using RNA samples of blood and  
263 eight tissues (brain, pharyngeal pouch, head sarcoma, spleen, liver, chest muscle, kidney, and heart)  
264 from four healthy adult individuals. The aggregate of 760 Gb raw reads was accumulated by the paired-  
265 end sequencing of the 36 constructed libraries. After filtering the adaptor and low-quality sequences,  
266 723 Gb qualified Illumina reads remained, *de novo* assembled into unique transcripts (unigenes). Overall,  
267 a total of 216,229 unigenes were assembled and at the level N50, 5,082 nucleotides were obtained. Total  
268 21,208 protein-coding gene annotations were predicted in Lion-head goose by combining *de novo*  
269 prediction, homologous protein prediction, and transcription alignment. After filtering TE-related genes,  
270 a total of 21,010 protein-coding gene annotations were finally obtained by the TE seeker database (**Fig.**  
271 **2**). Furthermore, a total of 8.15% repeat sequence and 4.10% tandem repeats of the genome were  
272 detected (**Table 1**). Comparative statistics of genome quality metrics with the assembled goose genome  
273 (including Zhedong white goose, Sichuan white goose and Tianfu goose) are shown in **Table 2**.

### 274 **Phylogenetic analysis**

275 To investigate the genomic evolution of poultry, we compared the sequences of eight bird species (Lion-  
276 head goose, Zhedong white goose, duck, turkey, chicken, pigeon, saker, and titmouse) and green lizard,  
277 clustering the genes into 15,162 gene families (**Fig. 3A, Supplementary Table S5**). Among these, 6,422  
278 single-copy gene families were identified and used to construct a phylogenetic tree (**Fig. 3B**). This  
279 revealed that the geese and ducks were clustered into a subclade that probably evolved from a common

280 ancestor approximately 28.42 million years ago (Mya). As expected, the Lion-head goose displayed a  
281 close relationship with the Zhedong white goose. The divergence time between the Lion-head goose and  
282 Zhedong white goose was estimated to be 13.79 Mya, and that between chicken and turkey was nearly  
283 25.07 Mya. The above results confirmed the reliability of the tree.

284 Of all the gene families in the Lion-head goose, 4,233 gene families were significantly expanded and  
285 324 were contracted. Compared with Zhedong white goose, the Lion-head goose had more gene families  
286 and there are also more events of gene family expansion and contraction. Moreover, we mixed the gene  
287 family sets of several *Anatidae* varieties (duck, Zhedong white goose, Lion-head goose), and performed  
288 expansion and contraction analysis and corresponding GO enrichment analysis. In this task, the GO  
289 analysis of expanded gene families suggested the olfactory perception, such as detection of chemical  
290 stimulus involved in sensory perception of smell (GO:0050911,  $p = 6.97 \times 10^{-8}$ ), and odorant-binding  
291 (GO:0005549,  $p = 1.47 \times 10^{-5}$ ), both of which may be related to the adaptation of the species to find food  
292 in water (**Fig. 4A, Supplementary Table S6**). Meanwhile, contracted gene families were concentrated  
293 in the areas of glucose synthesis and metabolism, such as hexokinase activity (GO:0004396,  $p =$   
294  $7.64 \times 10^{-26}$ ), glucose binding (GO:0005536,  $p = 2.30 \times 10^{-22}$ ), cellular glucose homeostasis (GO:0001678,  
295  $p = 6.84 \times 10^{-18}$ ), glycolytic process (GO:0006096,  $p = 1.75 \times 10^{-15}$ ), hexose metabolic process  
296 (GO:0019318,  $p = 2.66 \times 10^{-14}$ ), carbohydrate phosphorylation (GO:0046835,  $p = 1.68 \times 10^{-9}$ ), and glucose  
297 6-phosphate metabolic process (GO:0051156,  $p = 1.27 \times 10^{-9}$ ), which may be closely related to  
298 characteristics of glycogen storage and utilization during migration (**Fig. 4B, Supplementary Table S7**).  
299 Besides, 220 unique gene families (other species lack these gene families) of the Lion-head goose were  
300 identified and functionally annotated in GO categories, such as protein kinase activity (GO:0004672,  $p$   
301  $= 6.85 \times 10^{-9}$ ), the regulation of apoptotic process (GO:0042981,  $p = 5.78 \times 10^{-34}$ ), the adenylate cyclase-  
302 modulating G protein-coupled receptor signaling pathway (GO:0007188,  $p = 5.92 \times 10^{-3}$ ), and fatty-acyl-  
303 CoA reductase (alcohol-forming) activity (GO:0080019,  $p = 8.94 \times 10^{-5}$ , **Fig. 4C, Supplementary Table**  
304 **S8**). Interestingly, we annotated a reproduction-related protein in the species-specific gene family,  
305 *Sterile* (Pfam ID: PF03015), acting on fatty-acyl-CoA reductase (alcohol-forming) activity, which may  
306 be related to the low reproductive rate caused by congenital infertility in geese.

307 Collinearity analysis allows one to judge molecular evolutionary events between species and explain  
308 the structural differences between the two genomes. We identified synteny blocks among avian genomes  
309 and found high collinearity between our assembly and the duck genome (genome size =1.19 Gb). Here,  
310 multiple chromosomes (Chr 1-5, 10, 12, 15, 17-20, 23, 26, 27, 29, 30, 32, 34, 36, 37, 39) of Lion-head  
311 goose were almost one-to-one collinear with those of the duck, but some chromosomal rearrangements  
312 occurred (**Fig. 3C, Supplementary Figure S3**). For example, on some chromosomes like Chr 1, 2, 3,  
313 and 4 of the duck genome, genes break and rearrange on the Lion-head goose genome, resulting in  
314 sequential inversion. In addition, some scaffolds such as Chr 9, 24, 25, 31, 35, 38 and 40, were not  
315 correlated with any chromosome of the duck genome maybe due to the different sources of genes on the  
316 chromosome. These results indicate that chromosome inversion and interchromosomal recombination  
317 may have occurred specifically in Lion-head goose during the evolutionary process, but this requires  
318 further investigation and verification. Moreover, Chr 4 of Lion-head goose was found to correspond to  
319 the sex chromosome Z of duck, except for the inversions of small patches of segments; therefore, we  
320 inferred that Chr 4 was the sex chromosome of the Lion-head goose. This information will be  
321 fundamental for comparative genomic studies in *Anatidae* animals.

### 322 **Cluster analysis of different goose species population**

323 Blood samples were collected from 514 geese (including Lion-head goose, Wuzong goose, Huangzong  
324 goose and Magang goose), and their weight was recorded, with the Lion-head goose using the minimum  
325 weight, the Wuzong goose using the maximum weight, and the Huangzong goose and Magang goose  
326 using the average weight. That is, the Lion-head goose weighed at least 9 kg, the Wuzong goose weighed  
327 at most 2.5 kg, the Huangzong goose weighed about 3-4 kg, and the Magang goose weighed 4.8-5.5 kg  
328 (**Table 6**). Blood from each sample was used for paired-end 100 resequencing. And the average raw data  
329 was 1,520.60 Mb, the average sequencing depth was 12.05×, the average coverage was 7.56%, the  
330 average matching rate was 91.31%, and 44,858 SNP loci were retained for subsequent analysis after  
331 screening SNPs with minimum allele frequency <5%, Hardy-Weinberg equilibrium test significance  
332 threshold of  $10^{-7}$ , and maximum deletion rate threshold of 0.7. We reconstructed the goose population  
333 structure using SNP data, revealing four distinct subpopulations. The PCA results demonstrated that the



334 Lion-head Goose population was clearly distinguishable from the Magang Goose, Wuzong Goose and  
335 Huangzong Goose, and there was a clear differentiation within the species (**Fig. 5A**). The clustering of  
336 Magang Goose and Huangzong Goose was closer together, probably related to their closer geographical  
337 location and the existence of some genetic exchange. The phylogenetic tree results were consistent with  
338 the PCA results. The clustering of Magang Goose and Huangzong Goose was closer to each other, and  
339 they clustered into one branch with Wuzong Goose (**Fig. 5B**).

#### 340 **Candidate genomic regions for body weight based on combined analyses of GWAS and selective-** 341 **sweep**

342 The Lion-head Goose, Huangzong Goose, Magang Goose, and Wuzong Goose are all local species  
343 in Guangdong, but they differ greatly in body weight. In this study, we sought to reveal genomic changes  
344 associated with body weight in the four goose species and screen genomic regions and genes. Selective  
345 sweep analysis was performed based on the  $F_{ST}$  index, considering the top 5% window as candidate  
346 regions. And 979 selective regions containing 818 genes were detected.

347 We then combined the GWAS results with the detected selective features to screen for candidate  
348 genomic regions responsible for the differences in goose weight. From the Manhattan plot (**Fig. 5C**), a  
349 total of 10 significant signals were found to be associated with body weight trait in geese at the genome-  
350 wide level, including one significant SNP detected on Chr 2, 8, 9, and 33 respectively ( $-\log(p) > 7.30$ ),  
351 and six significant SNPs annotated by two genes on Chr 22, with the closest Manhattan plot SNP peak  
352 on Chr 9 for the gene *OR* (Olfactory receptor). Six significant SNPs on Chr 22 are located between  
353 1,992,485 and 1,992,520 bp, a region that spans only a physical distance of 35 bp but contains six SNP  
354 loci, making it necessary to analyze these SNPs in this small region in detail to determine whether  
355 multiple QTL are involved. The most significant SNP in this region could explain about 8.19% of the  
356 phenotypic variation. Apart from significant SNPs, potentially significant QTLs were detected on many  
357 chromosomes (including Chr 2, 3, 6, 7, 10, 11, 15, 16, 20, 28, 30, 32, 36), with a total of 25 implied  
358 significant SNPs ( $4.90 < -\log(p) < 7.30$ ). On Chr 30, the suggestively significant SNPs were located  
359 between 1,258,517 and 2,422,666 bp, spanning approximately 1.16 Mb, with the most significant SNPs  
360 in this region explaining approximately 6.12% of the phenotypic variation (**Table 4**). In the present study,

361 we identified genes in the region near the significant SNPs, annotating a total of 21 genes. These genes  
362 may be important in mediating growth and development, and we inference that the *LDLRAD4* gene may  
363 play a key role in developmental plasticity in geese, while the *GPR180* gene may regulate the locomotor  
364 behavior of geese to make them stronger (**Fig. 6**). GWAS peaks overlapped with genomic regions with  
365 selective features on some chromosomes (**Supplementary Data**). This suggests that the region carrying  
366 QTL are not only associated with body weight in GWAS, but are also under selection during  
367 domestication.

## 368 **Discussion**

369 Despite the importance of the genus *Anser*, an economically important animal, the relative scarcity of  
370 genomic resources has largely hindered progress in studying genome evolution and molecular breeding  
371 in the major animals. High-quality chromosome-level genomes can provide key resources for studying.  
372 This study describes a chromosome-scale assembly of Lion-head goose obtained by a combination of  
373 data from the Illumina, SMRT, BioNano, and Hi-C platforms. The genome assembly is 1.19 Gb in length,  
374 and more than 97.27% of the assembled genome is anchored on 40 pseudo-chromosomes. The BUSCO  
375 assessment revealed 99.02% complete genes in the assembled genome, making it a better-continuity and  
376 higher-quality genome assembly than the recently published Tianfu goose genome with a contig N50 of  
377 1.85 Mb and scaffold N50 of 33.12 Mb [38]. Compared with the cultivated breed Tianfu goose, Lion-  
378 head goose, a traditional native breed, should occupy a more prominent position in the germplasm  
379 resources, and its evolving message can provide a reference for other local breeds which is worthy of  
380 in-depth study.

381 Comparative genomics is the analysis of the structural characteristics of multiple individual genomes  
382 of a species or genomes of multiple species to find out the similarities and differences of gene sequences  
383 of species with the help of bioinformatics, and then to study the gene family analysis, analyze the  
384 differentiation and evolution of species, to provide a basis for elucidating species evolution. In this study,  
385 the evolutionary events of the Lion-head goose were analyzed by comparing the genome sequences with  
386 those of other birds. The results showed that the Lion-head goose and Zhedong White goose were most

387 closely related, diverging at about 13.8 Mya, while the geese and ducks diverged at 28.4 Mya. The  
388 results were similar to those of Zhedong White goose, Sichuan White goose and Tianfu goose, indicating  
389 the accuracy of the assembly result of this study. Comparative genomic analysis revealed the genetic  
390 basis of interesting characters, which helped elucidate important biological implications and obtain  
391 solutions for genomic evolution between Lion-head geese and other species of *Anatidae* family,  
392 facilitating future genetic breeding programs. This is the first chromosomal level reference genome of  
393 Lion-head goose, providing important genomic data for the study of the family *Anatidae*.

394 The genomic information of the species population was obtained by whole-genome resequencing,  
395 and a large amount of variation information was obtained by comparison with the reference genome.  
396 Based on the correlation between differences in variation information and phenotypic differences of  
397 individuals, the adaptation of species to the environment, scanning of variant loci associated with  
398 important traits at the genome level, and localization of genetic mutations were discussed. Lion head  
399 goose, Magang goose, Huangzong goose and Wuzong goose are the main breeds of geese in Guangdong  
400 Province. Although they all belong to Guangdong Province, the body weight of adult geese varies greatly,  
401 and the molecular mechanism causing the huge difference is still unclear. In this study, four goose  
402 species were resequenced and examined for variation. Principal component analysis and phylogenetic  
403 tree analysis revealed significant differences among several goose species, indicating the feasibility of  
404 this study. Subsequently, GWAS was used to identify the candidate functional SNPs that might cause  
405 the weight difference of the four goose species, and the genes such as LDLRAD4, GPR180, and OR  
406 were analyzed and annotated, attributed to play an important role in mediating growth and development.  
407 Recently, there have been several studies related to agricultural traits that have achieved success in  
408 animal GWAS projects, for example, GWAS for improving reproductive performance and egg quality  
409 in geese and *TMEM161A* gene for embryo development [39]. Genome-wide association analysis of the  
410 early-lactation milk fat content in 3,513 Fleckvieh bulls and 2327 Holstein bulls detected 6 associated  
411 QTL regions, two of which were located near the gene DGAT1 [40]. GWAS was conducted on 225  
412 ducks with different-sized black spots, and the results showed that EDNRB2 was the gene

413 responsible for the variation in duck body surface spot size [41]. In this study, *LDLRAD4* (low-  
414 density lipoprotein receptor class A domain containing 4), *OR* (Olfactory receptor), and  
415 *GPR180* (G protein-coupled receptor 180) were mainly found to function in body weight traits.  
416 Knockdown of *LDLRAD4* enhances transforming growth factor (TGF)- $\beta$ -induced cell migration, which  
417 in turn regulates cell growth, differentiation, motility, apoptosis and matrix protein production [42]. The  
418 olfactory receptor (*OR2AT4*) has been shown to stimulate the proliferation of keratin-forming cells in  
419 peripheral human tissues [43]. *GPR180*, a component of the TGF- $\beta$  signaling pathway, also has  
420 metabolic relevance in the body and may play an essential role in regulating adipose tissue and systemic  
421 energy metabolism [44]. Here we found some correlation between these genes and the TGF- $\beta$  signaling,  
422 presumably this pathway also acts on body weight. Identifying of molecular genetic markers and the  
423 main effect QTL associated with critical agricultural traits is of great interest to breeders. Nevertheless,  
424 the candidate genes identified in this study were only detected by sequencing data and not  
425 experimentally validated. The functions of these candidate SNPs and gene markers need to be further  
426 verified by experimental results or other techniques. Thus, the findings in our GWAS study represent a  
427 valuable resource for geese and provide a new opportunity and basis for geneticists and breeders to work  
428 together to explore the genetics behind various agricultural traits.

## 429 **Conclusions**

430 In summary, we have obtained a high-quality chromosome-scale draft assembly of a purebred Lion-  
431 head goose, which provides a genetic basis for understanding the acquisition of related traits and  
432 facilitates advances in goose genomics and genetic improvement. Moreover, the candidate genes and  
433 their variants identified in this study will help clarify our understanding of goose selective breeding and  
434 the development of new breeds. The obtained genome sequence of Lion-head goose is a vital addition  
435 to the genome of genus *Anser* and is valuable for further understanding goose molecular breeding  
436 strategies. This genomic resource is also of high value for evolutionary studies of closely related species.

## 437 **Data Availability**

438 The final genome assembly data supporting the results of this article is available in the NCBI BioProject

439 repository, [Accession number: PRJNA736831]. The RNA assembly data is available in the NCBI  
440 BioProject repository, [Accession number: PRJNA807796]. The raw re-sequencing genome data  
441 supporting of the GWAS study is available in the NCBI BioProject repository [Accession number:  
442 PRJNA552198, PRJNA552383, and PRJNA552384].

#### 443 **Additional Files**

444 Supplementary Figure S1. Sequencing process and presentation.

445 Supplementary Figure S2. BUSCO assessment of the assembly genome of Lion-head goose.

446 Supplementary Figure S3. Gene synteny between the Lion-head goose and duck genomes.

447 Supplementary Table S1. Statistics of sequenced clean data.

448 Supplementary Table S2. Statistics of genome survey.

449 Supplementary Table S3. Statistics of genome assembly quality.

450 Supplementary Table S4. Summary of BUSCOs genome evaluation.

451 Supplementary Table S5: Summary of gene families from several species.

452 Supplementary Table S6. GO annotation of expanded gene families from Anatidae varieties (Duck,  
453 Zhedong white goose, Lion-head goose; Top 20).

454 Supplementary Table S7. GO annotation of contraction gene families from Anatidae varieties (Duck,  
455 Zhedong white goose, Lion-head goose; Top 20).

456 Supplementary Table S8. GO annotation of unique gene families from the Lion-head goose.

457 Supplementary Data. Significant information of selective-sweep analysis.

#### 458 **Abbreviations**

459 BLAST: Basic Local Alignment Search Tool; BWA: Burrows-Wheeler Aligner; BUSCO:  
460 Benchmarking Universal Single-Copy Orthologs; Chr: chromosome; GATK4: Genome Analysis Toolkit  
461 4; Gb: gigabase pairs; GO: gene ontology; GPR180: G protein-coupled receptor 180; GWAS: genome-  
462 wide association study; HERA: Highly Efficient Repeat Assembly; Hi-C: high-throughput chromosome  
463 conformation capture; Kb: kilobase pairs; kg: kilogram; LDLRAD4: low-density lipoprotein receptor  
464 class A domain containing 4; LTR: long terminal repeat; Mb: megabase pairs; Mya: million years ago;

465 NCBI: National Center for Biotechnology Information; OR: Olfactory receptor; OR2AT4: olfactory  
466 receptor family 2 subfamily AT member 4; PacBio: Pacific Biosciences; PCA: Principal component  
467 analysis; QTL: quantitative trait locus; RAxML: Randomized Axelerated Maximum Likelihood; RNA-  
468 seq: RNA sequencing; SMRT: single molecule real-time; SNP: single-nucleotide polymorphism; STAR:  
469 Spliced Transcripts Alignment to a Reference; TE: transposable element; TGF: transforming growth  
470 factor; TMEM161A: Transmembrane protein 161A.

## 471 **Competing Interests**

472 The authors declare that they have no conflict of interest.

## 473 **Funding**

474 This work was supported by the Key Research and Development Program of Guangdong Province  
475 (2020B020222001), the Construction of Modern Agricultural Science and Technology Innovation  
476 Alliance in Guangdong Province (2021KJ128, 2020KJ128), the National Modern Agricultural Industry  
477 Science and Technology Innovation Center in Guangzhou (2018kczx01), the Guangdong Provincial  
478 Promotion Project on Preservation and Utilization of Local Breed of Livestock and Poultry (4000-  
479 F18260), the Guangdong Basic and Applied Basic Research Foundation (2019A1515012006). The  
480 authors would like to thank the BGI in Shenzhen for their work on genome sequencing. We also thank  
481 the staff of Minglead Gene for providing the technical and computing support during the research.

## 482 **Author's Contributions**

483 Q.X., Z.L., and X.Z. conceived and designed the research. X.Z., J.C., and Q.Z. coordinated the project.  
484 J.C. and Z.L. provided animal samples. Q.Z. and Z. X. collected and prepared the samples. Q.Z.  
485 performed sequencing, assembly and bioinformatics analysis. W.L., and F.C. led work identifying  
486 genes, and H.L., W.C. aided with many aspects of gene identification and did the GO analyses. Q.Z.,  
487 X.Z. wrote and revised the manuscript and the supplementary information. J.W., M.J., Z.H., H.Z.,  
488 Z.L., and Q.X. participated in discussions and provided valuable advice. All authors read and approved  
489 the manuscript.

## 490 **References**

- 491 1. Hoyo JD, Elliott A, Sargatal J, et al. Handbook of the birds of the world. Barcelona: Lynx Edicions; 1992.
- 492 2. Madsen J, Marcussen LK, Knudsen N, et al. Does intensive goose grazing affect breeding waders? *Ecol Evol*  
493 2019;**9**(24):14512-14522. doi:10.1002/ece3.5923.
- 494 3. Wang Y, Li SM, Huang J, et al. Mutations of TYR and MITF Genes are Associated with Plumage Colour  
495 Phenotypes in Geese. *Asian-Australas J Anim Sci* 2014;**27**(6):778-83. doi:10.5713/ajas.2013.13350.
- 496 4. Gao G, Zhao X, Li Q, et al. Genome and metagenome analyses reveal adaptive evolution of the host and  
497 interaction with the gut microbiota in the goose. *Sci Rep* 2016;**6**:32961. doi:10.1038/srep32961.

- 498 5. Yao Y, Yang YZ, Gu TT, et al. Comparison of the broody behavior characteristics of different breeds of geese.  
499 *Poult Sci* 2019;**98**(11):5226-5233. doi:10.3382/ps/pez366.
- 500 6. Lu L, Chen Y, Wang Z, et al. The goose genome sequence leads to insights into the evolution of waterfowl  
501 and susceptibility to fatty liver. *Genome Biol* 2015;**16**:89. doi:10.1186/s13059-015-0652-y.
- 502 7. Li HF, Zhu WQ, Chen KW, et al. Two maternal origins of Chinese domestic goose. *Poult Sci*  
503 2011;**90**(12):2705-10. doi:10.3382/ps.2011-01425.
- 504 8. Tang J, Shen X, Ouyang H, et al. Transcriptome analysis of pituitary gland revealed candidate genes and gene  
505 networks regulating the growth and development in goose. *Anim Biotechnol* 2020:1-11.  
506 doi:10.1080/10495398.2020.1801457.
- 507 9. Zhang X, Wang J, Li X, et al. Transcriptomic investigation of embryonic pectoral muscle reveals increased  
508 myogenic processes in Shitou geese compared to Wuzong geese. *Br Poult Sci* 2021;**62**(5):650-657.  
509 doi:10.1080/00071668.2021.1912292.
- 510 10. Ardui S, Ameer A, Vermeesch JR, et al. Single molecule real-time (SMRT) sequencing comes of age:  
511 applications and utilities for medical diagnostics. *Nucleic Acids Res* 2018;**46**(5):2159-2168.  
512 doi:10.1093/nar/gky066.
- 513 11. Yoshinaga Y, Daum C, He G, et al. Genome Sequencing. *Methods Mol Biol* 2018;**1775**:37-52.  
514 doi:10.1007/978-1-4939-7804-5\_4.
- 515 12. Kong S, Zhang Y. Deciphering Hi-C: from 3D genome to function. *Cell Biol Toxicol* 2019;**35**(1):15-32.  
516 doi:10.1007/s10565-018-09456-2.
- 517 13. Nakano K, Shiroma A, Shimoji M, et al. Advantages of genome sequencing by long-read sequencer using  
518 SMRT technology in medical area. *Hum Cell* 2017;**30**(3):149-161. doi:10.1007/s13577-017-0168-8.
- 519 14. Jain M, Olsen HE, Turner DJ, et al. Linear assembly of a human centromere on the Y chromosome. *Nat*  
520 *Biotechnol* 2018;**36**(4):321-323. doi:10.1038/nbt.4109.
- 521 15. Sun L, Gao T, Wang F, et al. Chromosome-level genome assembly of a cyprinid fish *Onychostoma macrolepis*  
522 by integration of nanopore sequencing, Bionano and Hi-C technology. *Mol Ecol Resour* 2020;**20**(5):1361-  
523 1371. doi:10.1111/1755-0998.13190.
- 524 16. Bocklandt S, Hastie A, Cao H. Bionano Genome Mapping: High-Throughput, Ultra-Long Molecule Genome  
525 Analysis System for Precision Genome Assembly and Haploid-Resolved Structural Variation Discovery. *Adv*  
526 *Exp Med Biol* 2019;**1129**:97-118. doi:10.1007/978-981-13-6037-4\_7.
- 527 17. Koren S, Walenz BP, Berlin K, et al. Canu: scalable and accurate long-read assembly via adaptive k-mer  
528 weighting and repeat separation. *Genome Res* 2017;**27**(5):722-736. doi:10.1101/gr.215087.116.
- 529 18. Du H, Liang C. Assembly of chromosome-scale contigs by efficiently resolving repetitive sequences with long  
530 reads. *Nat Commun* 2019;**10**(1):5360. doi:10.1038/s41467-019-13355-3.
- 531 19. Li H, Durbin R. Fast and accurate short read alignment with Burrows-Wheeler transform. *Bioinformatics*  
532 2009;**25**(14):1754-60. doi:10.1093/bioinformatics/btp324.
- 533 20. Li H, Handsaker B, Wysoker A, et al. The Sequence Alignment/Map format and SAMtools. *Bioinformatics*  
534 2009;**25**(16):2078-9. doi:10.1093/bioinformatics/btp352.
- 535 21. Walker BJ, Abeel T, Shea T, et al. Pilon: an integrated tool for comprehensive microbial variant detection and  
536 genome assembly improvement. *Plos One* 2014;**9**(11):e112963. doi:10.1371/journal.pone.0112963.
- 537 22. Durand NC, Shamim MS, Machol I, et al. Juicer Provides a One-Click System for Analyzing Loop-Resolution  
538 Hi-C Experiments. *Cell Syst* 2016;**3**(1):95-8. doi:10.1016/j.cels.2016.07.002.
- 539 23. Dudchenko O, Batra SS, Omer AD, et al. De novo assembly of the *Aedes aegypti* genome using Hi-C yields  
540 chromosome-length scaffolds. *Science* 2017;**356**(6333):92-95. doi:10.1126/science.aal3327.
- 541 24. Servant N, Varoquaux N, Lajoie BR, et al. HiC-Pro: an optimized and flexible pipeline for Hi-C data processing.  
542 *Genome Biol* 2015;**16**(1). doi:10.1186/s13059-015-0831-x.
- 543 25. Bolger AM, Lohse M, Usadel B. Trimmomatic: a flexible trimmer for Illumina sequence data. *Bioinformatics*  
544 2014;**30**(15):2114-20. doi:10.1093/bioinformatics/btu170.
- 545 26. Grabherr MG, Haas BJ, Yassour M, et al. Full-length transcriptome assembly from RNA-Seq data without a  
546 reference genome. *Nat Biotechnol* 2011;**29**(7):644-52. doi:10.1038/nbt.1883.
- 547 27. Huang Y, Niu B, Gao Y, et al. CD-HIT Suite: a web server for clustering and comparing biological sequences.  
548 *Bioinformatics* 2010;**26**(5):680-2. doi:10.1093/bioinformatics/btq003.
- 549 28. Dobin A, Davis CA, Schlesinger F, et al. STAR: ultrafast universal RNA-seq aligner. *Bioinformatics*  
550 2013;**29**(1):15-21. doi:10.1093/bioinformatics/bts635.
- 551 29. Seppy M, Manni M, Zdobnov EM. BUSCO: Assessing Genome Assembly and Annotation Completeness.  
552 *Methods Mol Biol* 2019;**1962**:227-245. doi:10.1007/978-1-4939-9173-0\_14.
- 553 30. Manni M, Berkeley MR, Seppy M, et al. BUSCO: Assessing Genomic Data Quality and Beyond. *Curr Protoc*  
554 2021;**1**(12):e323. doi:10.1002/cpz1.323.
- 555 31. Lu L, Chen Y, Wang Z, et al. The goose genome sequence leads to insights into the evolution of waterfowl

- 556 and susceptibility to fatty liver. *Genome Biol* 2015;**16**:89. doi:10.1186/s13059-015-0652-y.
- 557 32. Benson G. Tandem repeats finder: a program to analyze DNA sequences. *Nucleic Acids Res* 1999;**27**(2):573-  
558 80. doi:10.1093/nar/27.2.573.
- 559 33. Wang Y, Tang H, Debarry JD, et al. MCScanX: a toolkit for detection and evolutionary analysis of gene  
560 synteny and collinearity. *Nucleic Acids Res* 2012;**40**(7):e49. doi:10.1093/nar/gkr1293.
- 561 34. Stamatakis A. RAxML version 8: a tool for phylogenetic analysis and post-analysis of large phylogenies.  
562 *Bioinformatics* 2014;**30**(9):1312-3. doi:10.1093/bioinformatics/btu033.
- 563 35. Sanderson MJ. r8s: inferring absolute rates of molecular evolution and divergence times in the absence of a  
564 molecular clock. *Bioinformatics* 2003;**19**(2):301-2. doi:10.1093/bioinformatics/19.2.301.
- 565 36. Han MV, Thomas GW, Lugo-Martinez J, et al. Estimating gene gain and loss rates in the presence of error in  
566 genome assembly and annotation using CAFE 3. *Mol Biol Evol* 2013;**30**(8):1987-97.  
567 doi:10.1093/molbev/mst100.
- 568 37. Yu G, Wang LG, Han Y, et al. clusterProfiler: an R package for comparing biological themes among gene  
569 clusters. *Omics* 2012;**16**(5):284-7. doi:10.1089/omi.2011.0118.
- 570 38. Li Y, Gao G, Lin Y, et al. Pacific Biosciences assembly with Hi-C mapping generates an improved,  
571 chromosome-level goose genome. *Gigascience* 2020;**9**(10). doi:10.1093/gigascience/giaa114.
- 572 39. Gao G, Gao D, Zhao X, et al. Genome-Wide Association Study-Based Identification of SNPs and Haplotypes  
573 Associated With Goose Reproductive Performance and Egg Quality. *Front Genet* 2021;**12**:602583.  
574 doi:10.3389/fgene.2021.602583.
- 575 40. Daetwyler HD, Capitan A, Pausch H, et al. Whole-genome sequencing of 234 bulls facilitates mapping of  
576 monogenic and complex traits in cattle. *Nat Genet* 2014;**46**(8):858-65. doi:10.1038/ng.3034.
- 577 41. Xi Y, Xu Q, Huang Q, et al. Genome-wide association analysis reveals that EDNRB2 causes a dose-dependent  
578 loss of pigmentation in ducks. *Bmc Genomics* 2021;**22**(1):381. doi:10.1186/s12864-021-07719-7.
- 579 42. Nakano N, Maeyama K, Sakata N, et al. C18 ORF1, a novel negative regulator of transforming growth factor-  
580 beta signaling. *J Biol Chem* 2014;**289**(18):12680-92. doi:10.1074/jbc.M114.558981.
- 581 43. Cheret J, Bertolini M, Ponce L, et al. Olfactory receptor OR2AT4 regulates human hair growth. *Nat Commun*  
582 2018;**9**(1):3624. doi:10.1038/s41467-018-05973-0.
- 583 44. Balazova L, Balaz M, Horvath C, et al. GPR180 is a component of TGFbeta signalling that promotes  
584 thermogenic adipocyte function and mediates the metabolic effects of the adipocyte-secreted factor CTHRC1.  
585 *Nat Commun* 2021;**12**(1):7144. doi:10.1038/s41467-021-27442-x.
- 586



587 **Figure legends**



588

589 **Figure 1. A picture of a male adult Lion-head goose.**

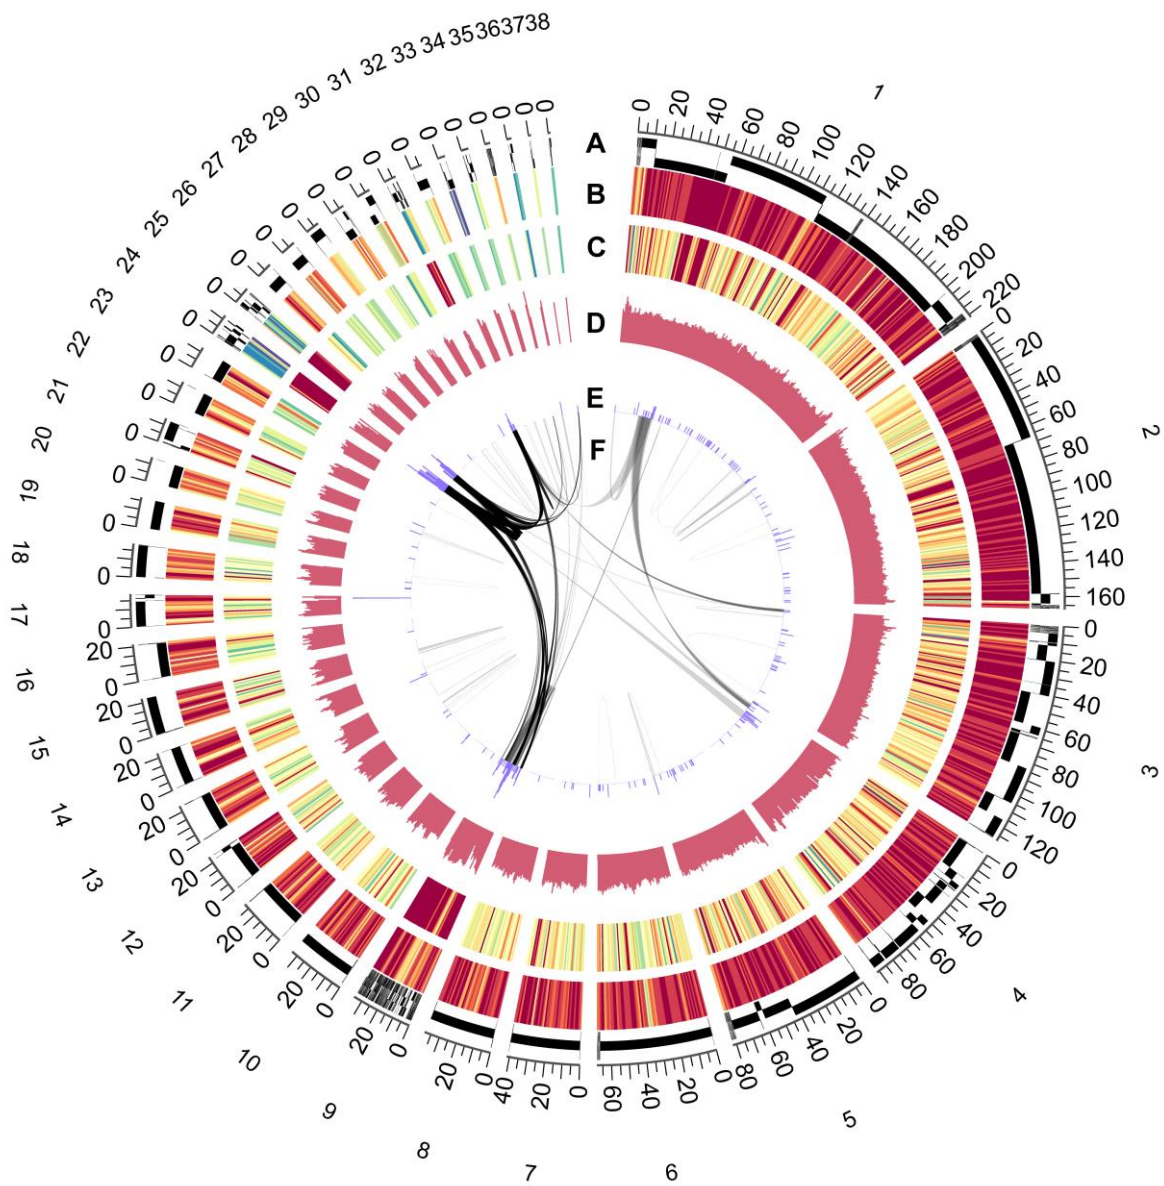

591

592 **Figure 2. Distribution of genomic features.** Concentric circle diagram presents the distribution of  
 593 genomic features of Lion-head goose using nonoverlapping sliding windows with sizes of 1 Mb (from  
 594 outmost to innermost). (A) the assembled pseudo-chromosome and the corresponding position; (B) gene  
 595 density calculated on the basis of the number of genes; (C) average expression level of overall 36  
 596 samples. eight tissues (i.e., brain, pharyngeal pouch, head sarcoma, spleen, liver, chest muscle, kidney  
 597 and heart) and blood collected from four healthy adult animals; (D) GC content; (E) density of TE; (F)  
 598 gene synteny and collinearity analysis.

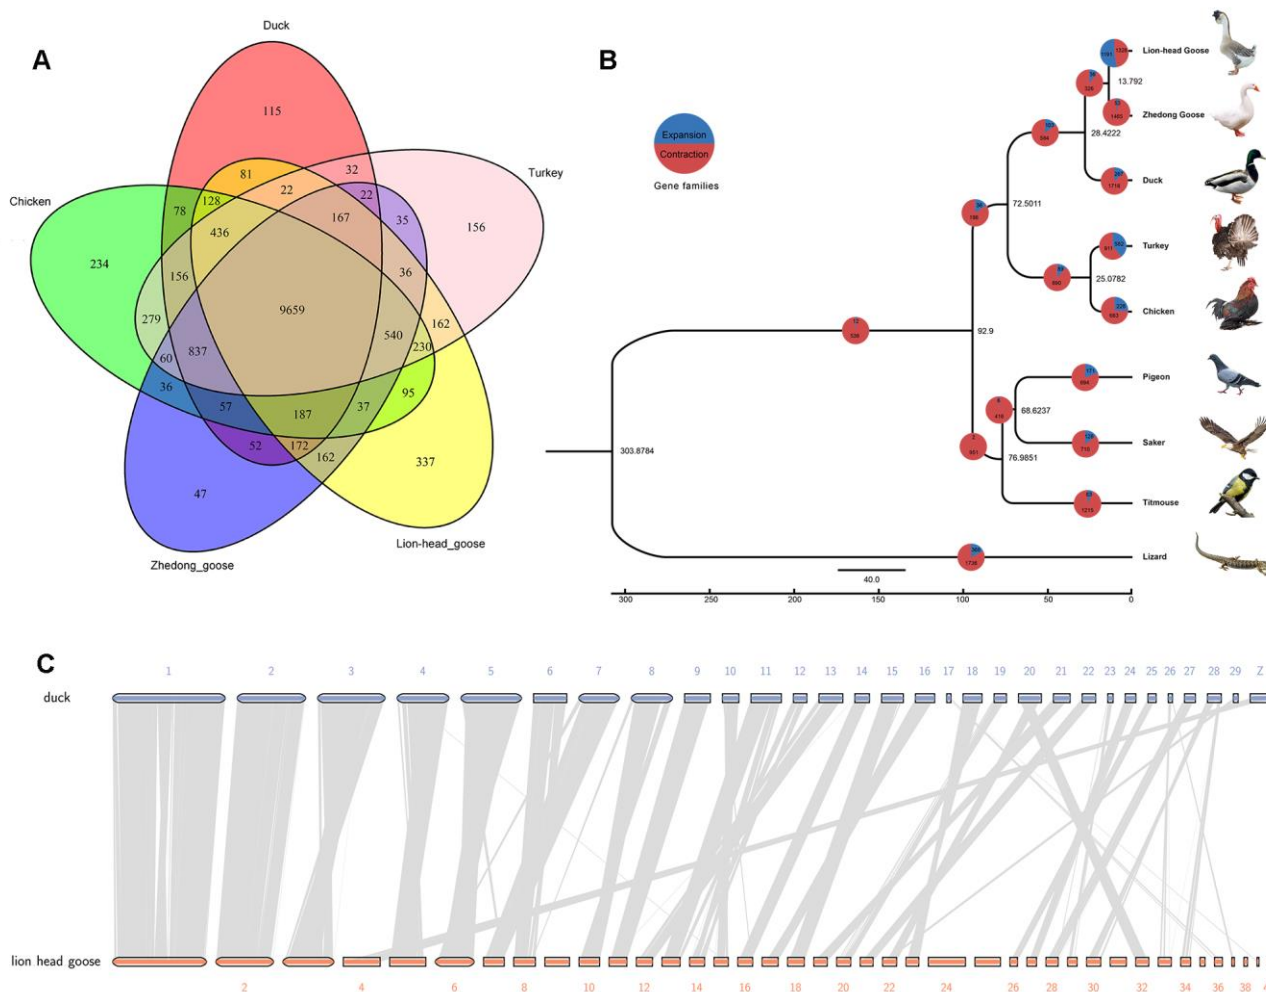

599

600 **Figure 3. Phylogenetic relationship and comparative genomics analyses.** (A) Venn diagram showing  
 601 the orthologous gene families shared among the genomes of Lion-head goose, Zhedong white goose,  
 602 chicken, duck, and turkey. (B) Phylogenetic tree with the divergence times and history of orthologous  
 603 gene families. Numbers on the nodes represent divergence times. The numbers of gene families that  
 604 expanded (green) or contracted (red) in each lineage after speciation are shown on the circles of the  
 605 corresponding branch. (C) Gene comparison of homologous chromosomes between Lion-head goose  
 606 and duck. Gray lines indicate collinearity between the genomes.

A

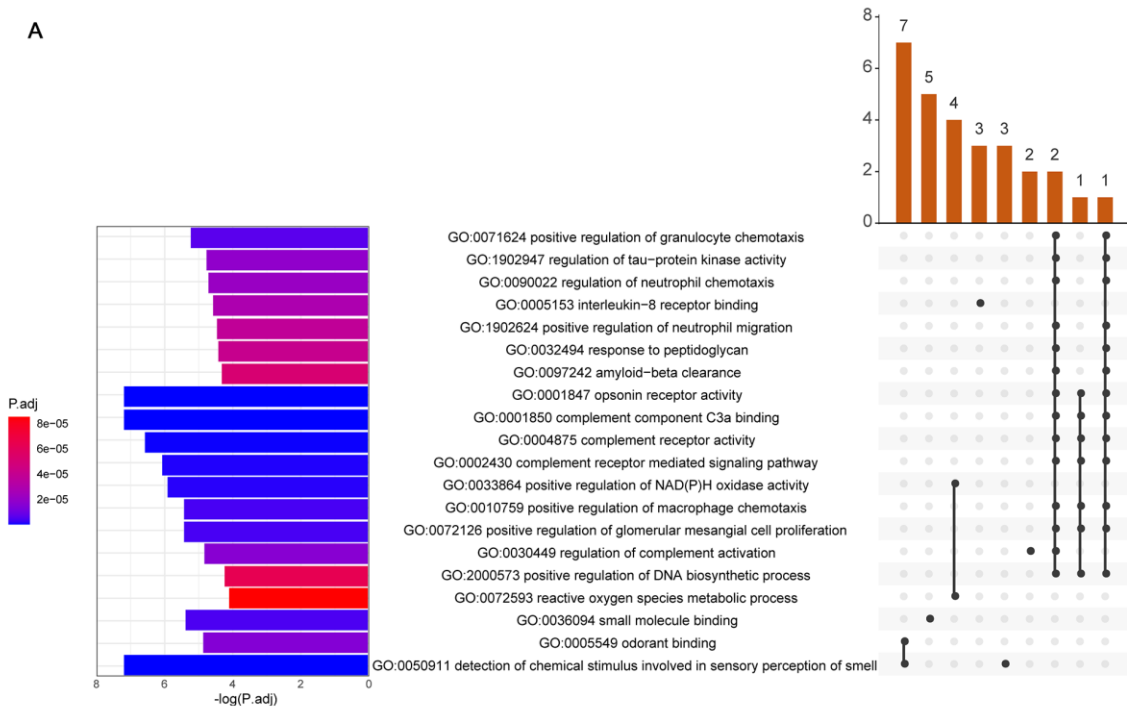

B

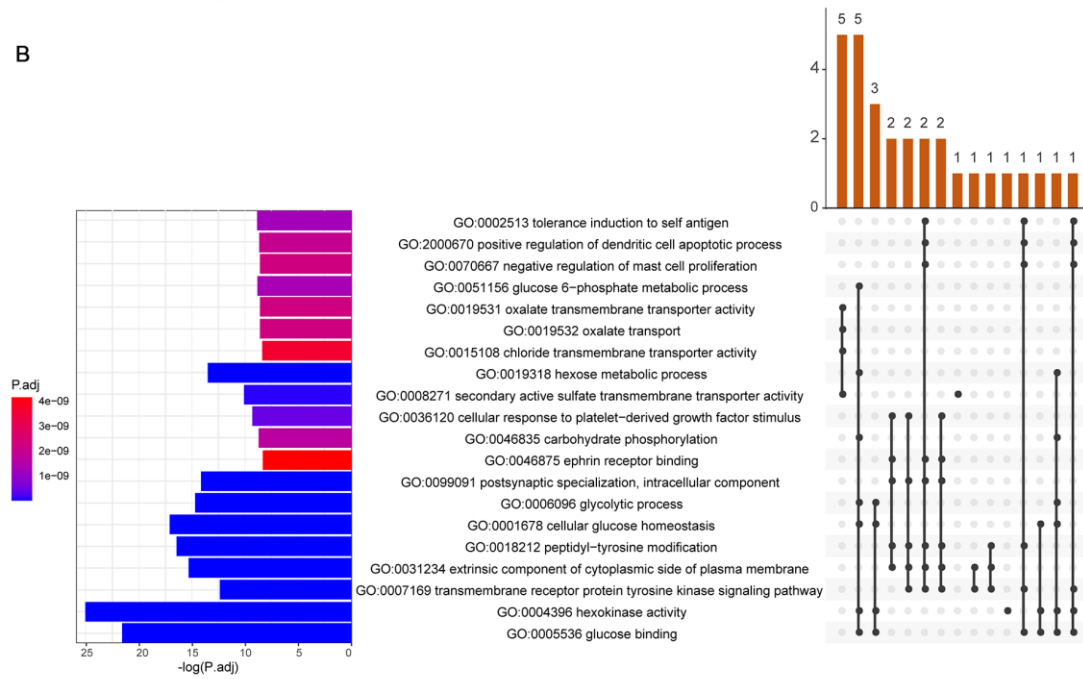

C

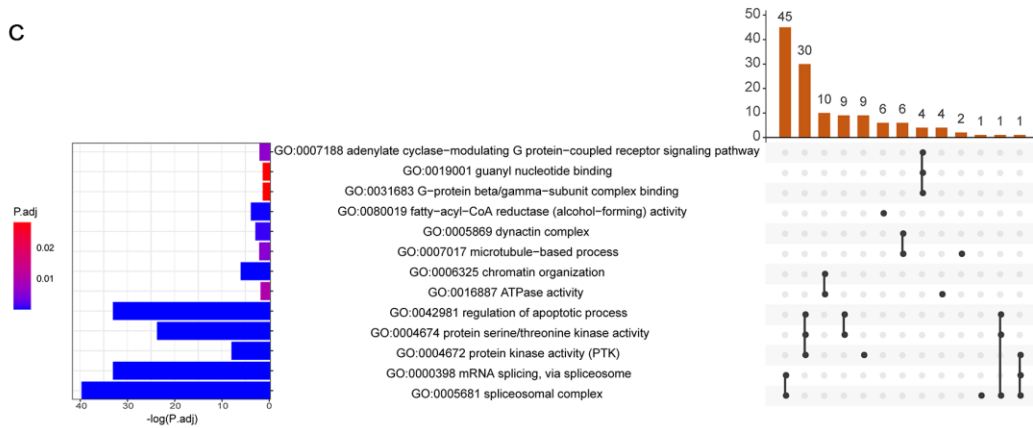

608 **Figure 4. GO enrichment analysis of gene families.** (A) Expanded and (B) contracted gene families  
609 from Anatidae varieties (duck, Zhedong white goose, Lion-head goose). (C) Unique gene families from  
610 the Lion-head goose. The bar graph on the left represents the P-adjust gradient of GO terms, and the  
611 color corresponds to the number on the x-axis (i.e.  $-\log(P.adjust)$ ). The bluer the color is, the smaller the  
612 P-adjust is, and the more significant it is. The redder the color is, the larger the P-adjust is, and the less  
613 significant it is. The upper right bar chart exhibits that several genes act together on the terms below.  
614 The lower right chart displays the intersection of the genes of each term; the dots connected by lines  
615 represent the intersection of multiple terms; the black dots represent “yes”, and the gray dots represent  
616 “no”.



617

618 **Figure 5. Comparison of different goose species and genome-wide association analysis of body**

619 **weight. (A)** Principal component analysis of sample structures using first two principal components. **(B)**

620 The phylogenetic trees of several goose species. **(C)** Manhattan plot of genome-wide association

621 analysis for body weight. The X-axis indicates chromosomes, and Y-axis indicates the P values of the

622 SNP markers. The red solid line indicates the threshold P value for genome-wide significance. The blue

623 solid line indicates the threshold P value for the significance of potential association.



624

625 **Figure 6. GO analysis of body weight-related genes:(A) Biological processes level, (B) Cellular**

626 **component level.**

**Table 1:** Summary of repeat classification.

| Type                              | Length      | Percent |
|-----------------------------------|-------------|---------|
| Long interspersed nuclear element | 76,437,757  | 5.98    |
| Simple sequence repeats           | 23,026,311  | 1.80    |
| Low complexity                    | 4,663,288   | 0.36    |
| Tandem repeats                    | 52,426,380  | 4.10    |
| Total                             | 156,553,736 | 12.25   |

627

**Table 2:** Comparison of the present study with previous quality metrics of goose genome assembly.

| Genomic features                      | Lion-head goose | Zhedong white goose | Sichuan white goose | Tianfu goose  |
|---------------------------------------|-----------------|---------------------|---------------------|---------------|
| Estimate of genome size (bp)          | 1,278,045,811   | 1,208,661,181       | 1,198,802,839       | 1,277,099,016 |
| Total length of contigs (bp)          | 1,268,074,106   | 1,086,838,604       | 1,100,859,441       | 1,113,842,245 |
| Total length of scaffolds (bp)        | 1,277,289,474   | 1,122,178,121       | 1,130,663,797       | 1,113,913,845 |
| Number of contigs                     | 1,318           | 60,979              | 53,336              | 2,771         |
| Number of scaffolds                   | 1,266           | 1,050               | 1,837               | 2,055         |
| Contig N50 (bp)                       | 21,589,146      | 27,602              | 35,032              | 1,849,874     |
| Scaffold N50 (bp)                     | 27,064,542      | 5,202,740           | 5,103,766           | 33,116,532    |
| Longest contig (bp)                   | 91,420,268      | 201,281             | 399,111             | 10,766,871    |
| Longest scaffold (bp)                 | 98,160,899      | 24,051,356          | 20,207,557          | 70,896,740    |
| GC content                            | 42.39%          | 38.00%              | 41.68%              | 42.15%        |
| No. of predicted protein-coding genes | 21,010          | 16,150              | 16,288              | 17,568        |
| Percentage of repeat sequences        | 12.25%          | 6.33%               | 6.90%               | 8.67%         |

628

**Table 3:** Descriptive statistical of body weight traits.

| Species         | Number | Max (Kg) | Min (Kg) | Mean±SEM   |
|-----------------|--------|----------|----------|------------|
| Lion-head goose | 416    | 15.70    | 9.00     | 13.55±1.97 |
| Magang goose    | 20     | 5.50     | 4.80     | 5.32±0.36  |
| Huangzong goose | 20     | 4.30     | 2.70     | 3.40±0.83  |
| Wuzong goose    | 44     | 2.50     | 1.80     | 2.24±0.25  |

629

**Table 4:** Genome-wide association analysis of body weight in geese.

| Chr | Allele | Physical position | Regression coefficient | P value  | Genes      |
|-----|--------|-------------------|------------------------|----------|------------|
| 2   | A      | 108496954         | -0.1886                | 1.01E-08 | LDLRAD4    |
| 2   | G      | 7706165           | 0.2612                 | 6.98E-06 | LDLRAD4    |
| 3   | T      | 123032780         | -0.3979                | 6.03E-07 | EGF, KBTBD |
| 6   | A      | 13264157          | -0.24                  | 6.28E-07 | TSPAN      |
| 6   | T      | 66027192          | 0.2127                 | 8.14E-07 | IGFN1      |
| 7   | T      | 39117443          | -0.3131                | 4.66E-06 | —          |
| 8   | T      | 14712470          | 0.1865                 | 8.97E-09 | PPEF1      |
| 9   | T      | 26883582          | -2.7E+12               | 0        | OR         |
| 10  | C      | 23997415          | -0.3032                | 1.19E-06 | —          |
| 10  | C      | 23997399          | -0.2542                | 1.05E-05 | —          |



|    |   |          |         |          |                |
|----|---|----------|---------|----------|----------------|
| 10 | T | 23997401 | -0.2542 | 1.05E-05 | —              |
| 11 | A | 22838749 | 0.1548  | 9.55E-06 | —              |
| 15 | T | 10257386 | 0.2527  | 2.96E-07 | GPR180, GPCPD1 |
| 16 | A | 1477673  | -0.1892 | 6.53E-06 | —              |
| 16 | G | 1477679  | -0.1891 | 6.78E-06 | —              |
| 20 | A | 8531879  | 0.151   | 3.05E-06 | —              |
| 22 | A | 1992485  | -0.3972 | 6.51E-09 | GALNT, AUTS2   |
| 22 | A | 1992518  | -0.3973 | 7.69E-09 | GALNT, AUTS2   |
| 22 | G | 1992501  | -0.3974 | 7.94E-09 | GALNT, AUTS2   |
| 22 | C | 1992505  | -0.3974 | 7.94E-09 | GALNT, AUTS2   |
| 22 | C | 1992507  | -0.3974 | 7.94E-09 | GALNT, AUTS2   |
| 22 | G | 1992515  | -0.3974 | 7.94E-09 | GALNT, AUTS2   |
| 28 | C | 3587271  | 0.2936  | 5.81E-08 | PPP1R15B, FGD2 |
| 28 | G | 4472051  | -0.2359 | 2.82E-06 | PPP1R15B, FGD2 |
| 30 | C | 1652158  | -0.3469 | 7.53E-07 | SH2            |
| 30 | T | 1258517  | 0.2205  | 1.48E-06 | SH2            |
| 30 | G | 2422665  | 0.1894  | 2.04E-06 | SH2            |
| 30 | T | 2422666  | 0.1894  | 2.04E-06 | SH2            |
| 30 | A | 1652207  | -0.3289 | 2.3E-06  | SH2            |
| 30 | T | 2269897  | 0.211   | 9.22E-06 | SH2            |
| 32 | G | 655318   | 0.2599  | 7.95E-06 | —              |
| 33 | A | 975487   | 0.2567  | 1.07E-08 | SDHA           |
| 36 | A | 1523127  | -0.3274 | 9.86E-07 | SPRY           |
| 36 | G | 1523132  | -0.3216 | 1.7E-06  | SPRY           |
| 36 | C | 1523105  | -0.3291 | 1.72E-06 | SPRY           |

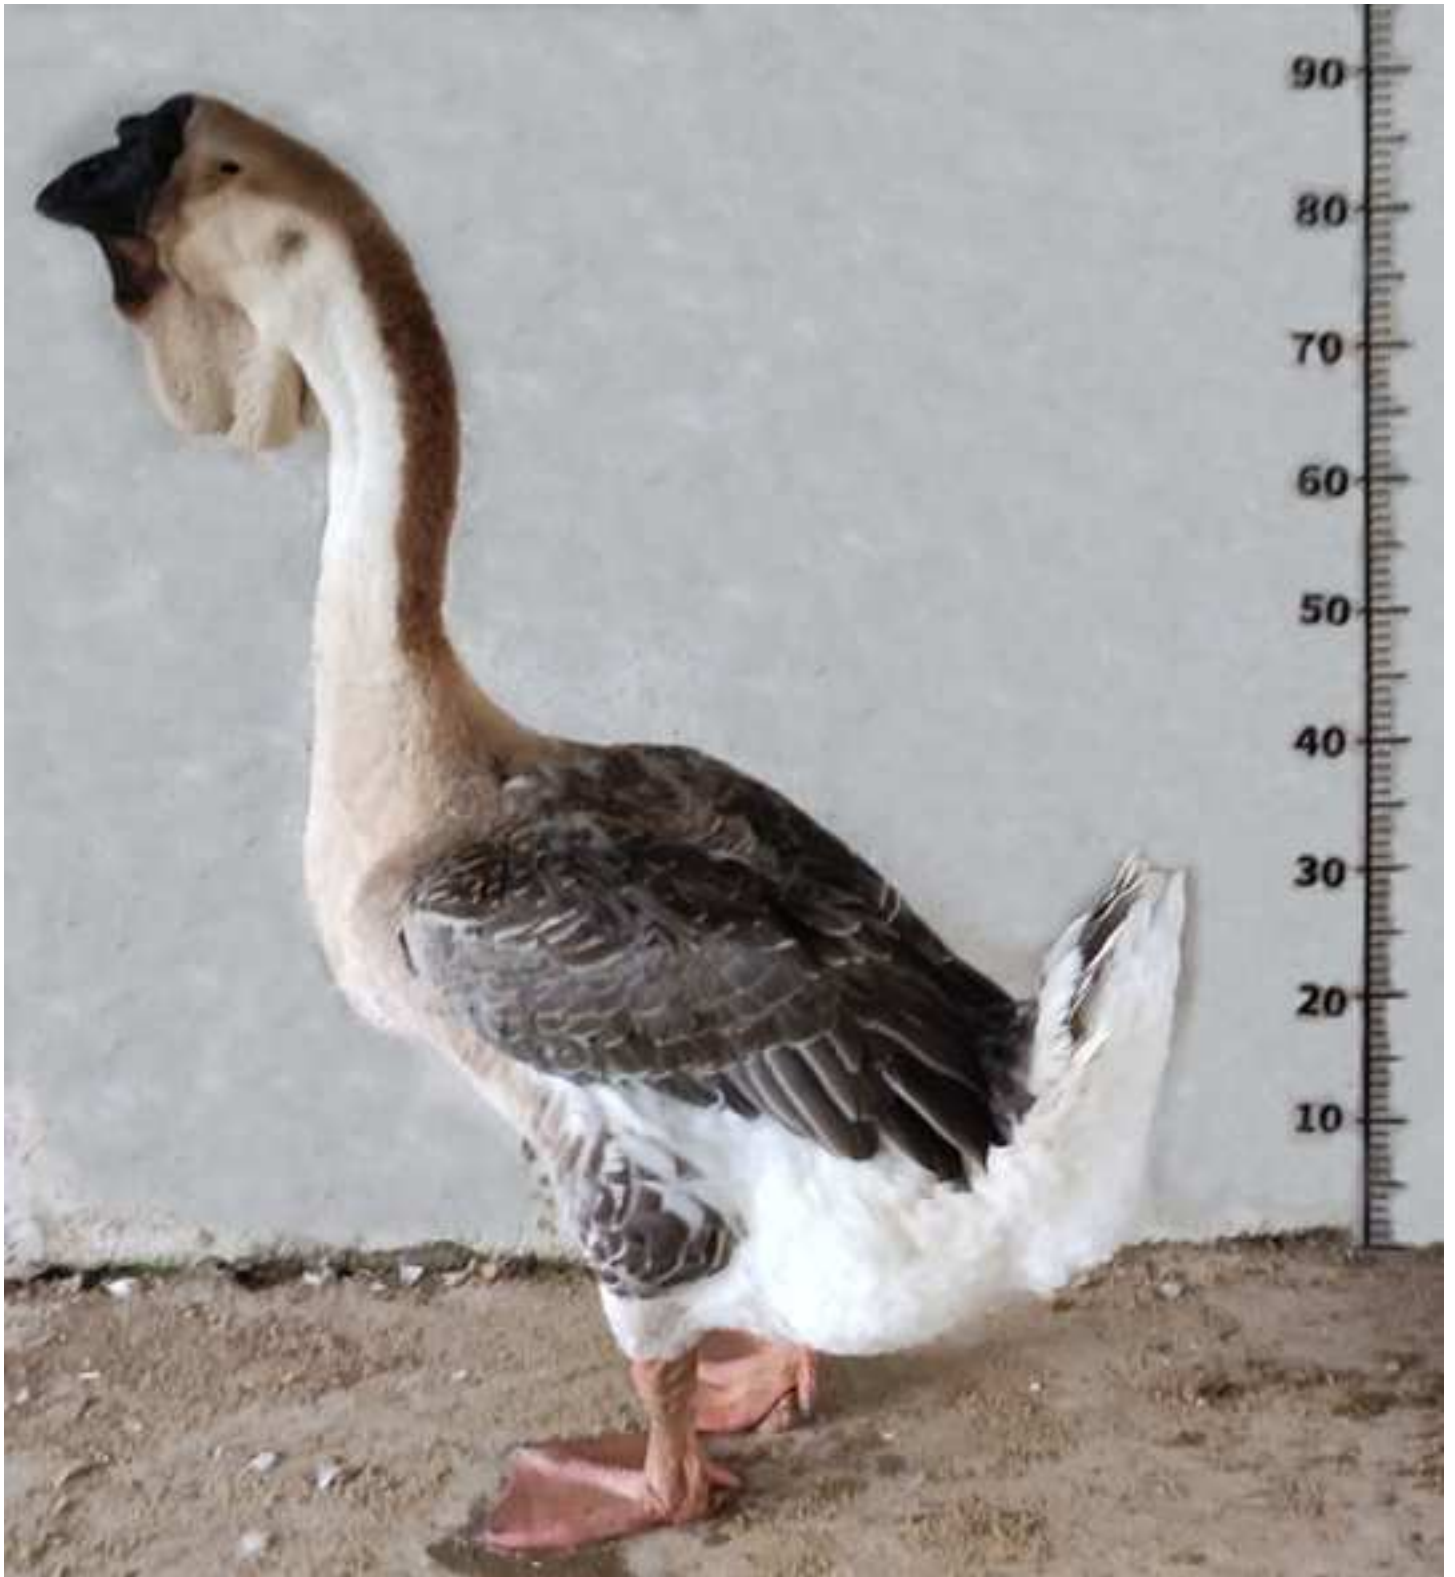

Figure 2

[Click here to access/download;Figure;2.tif](#)

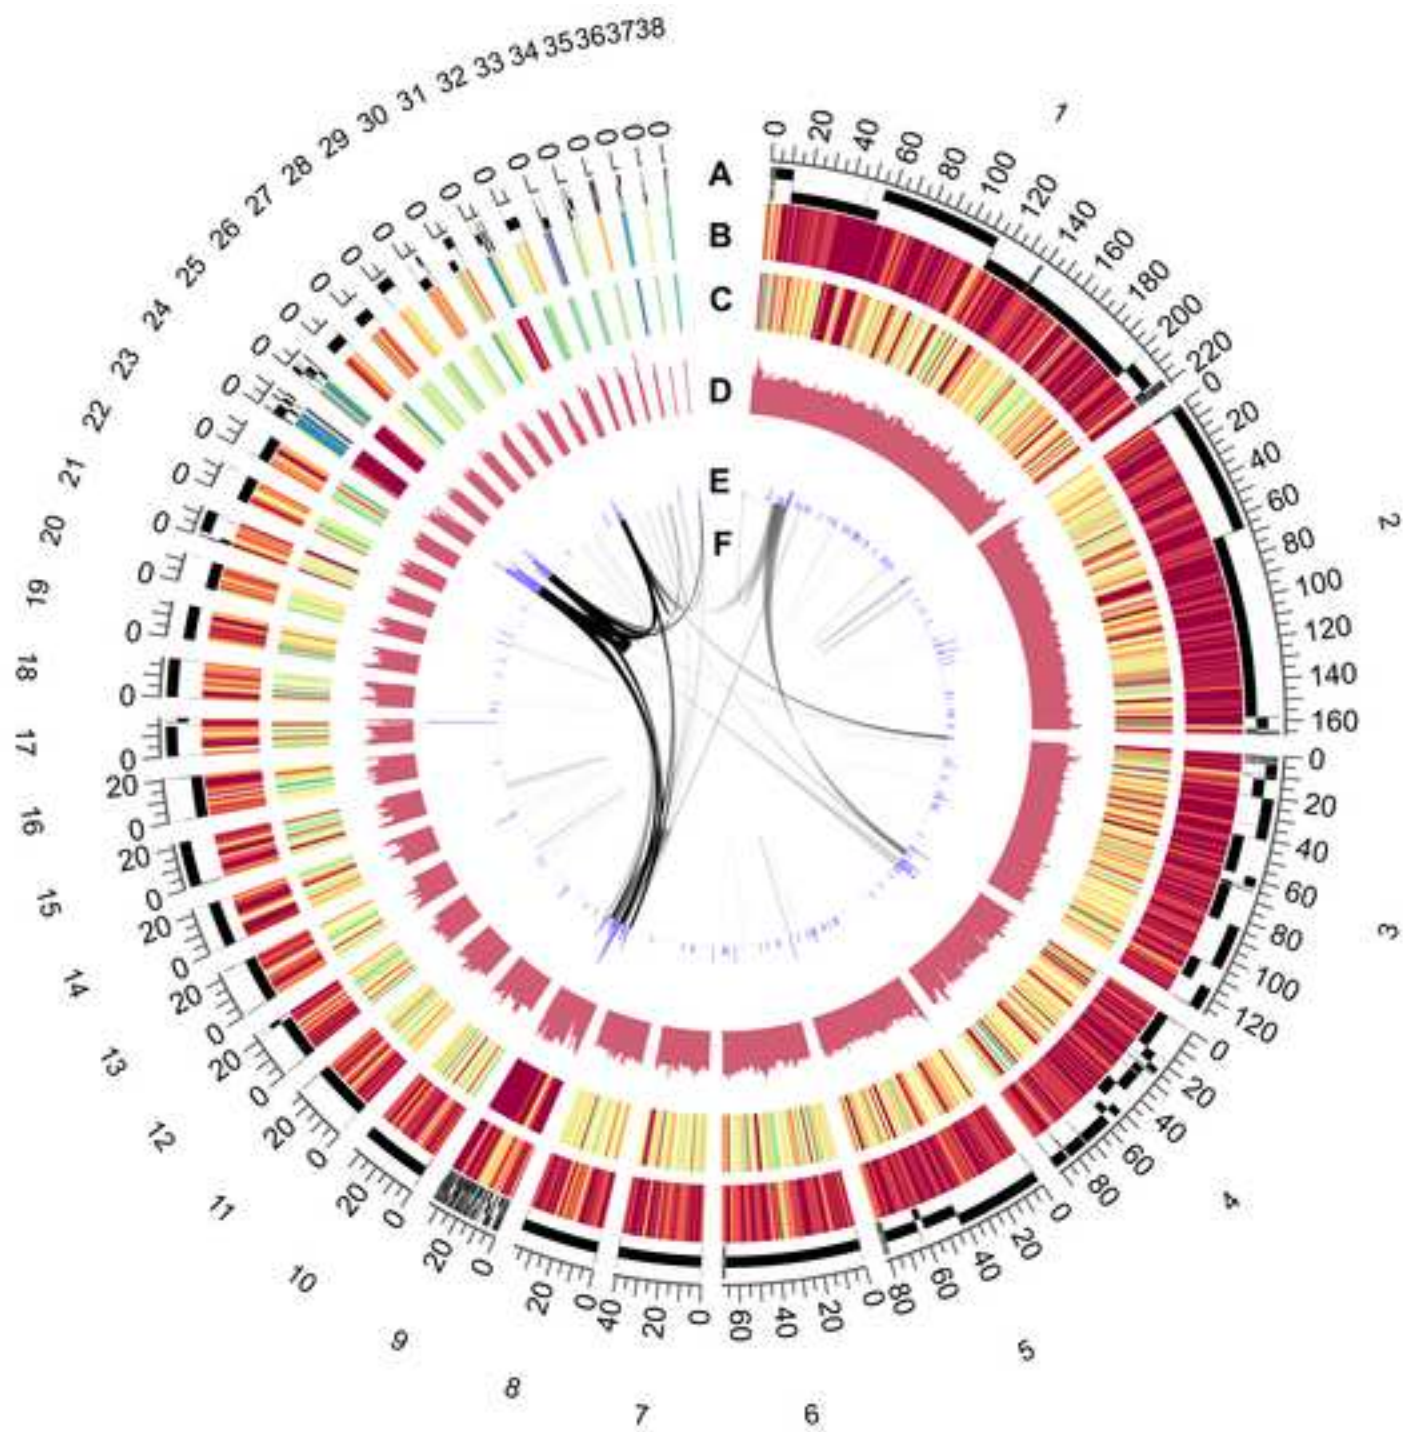

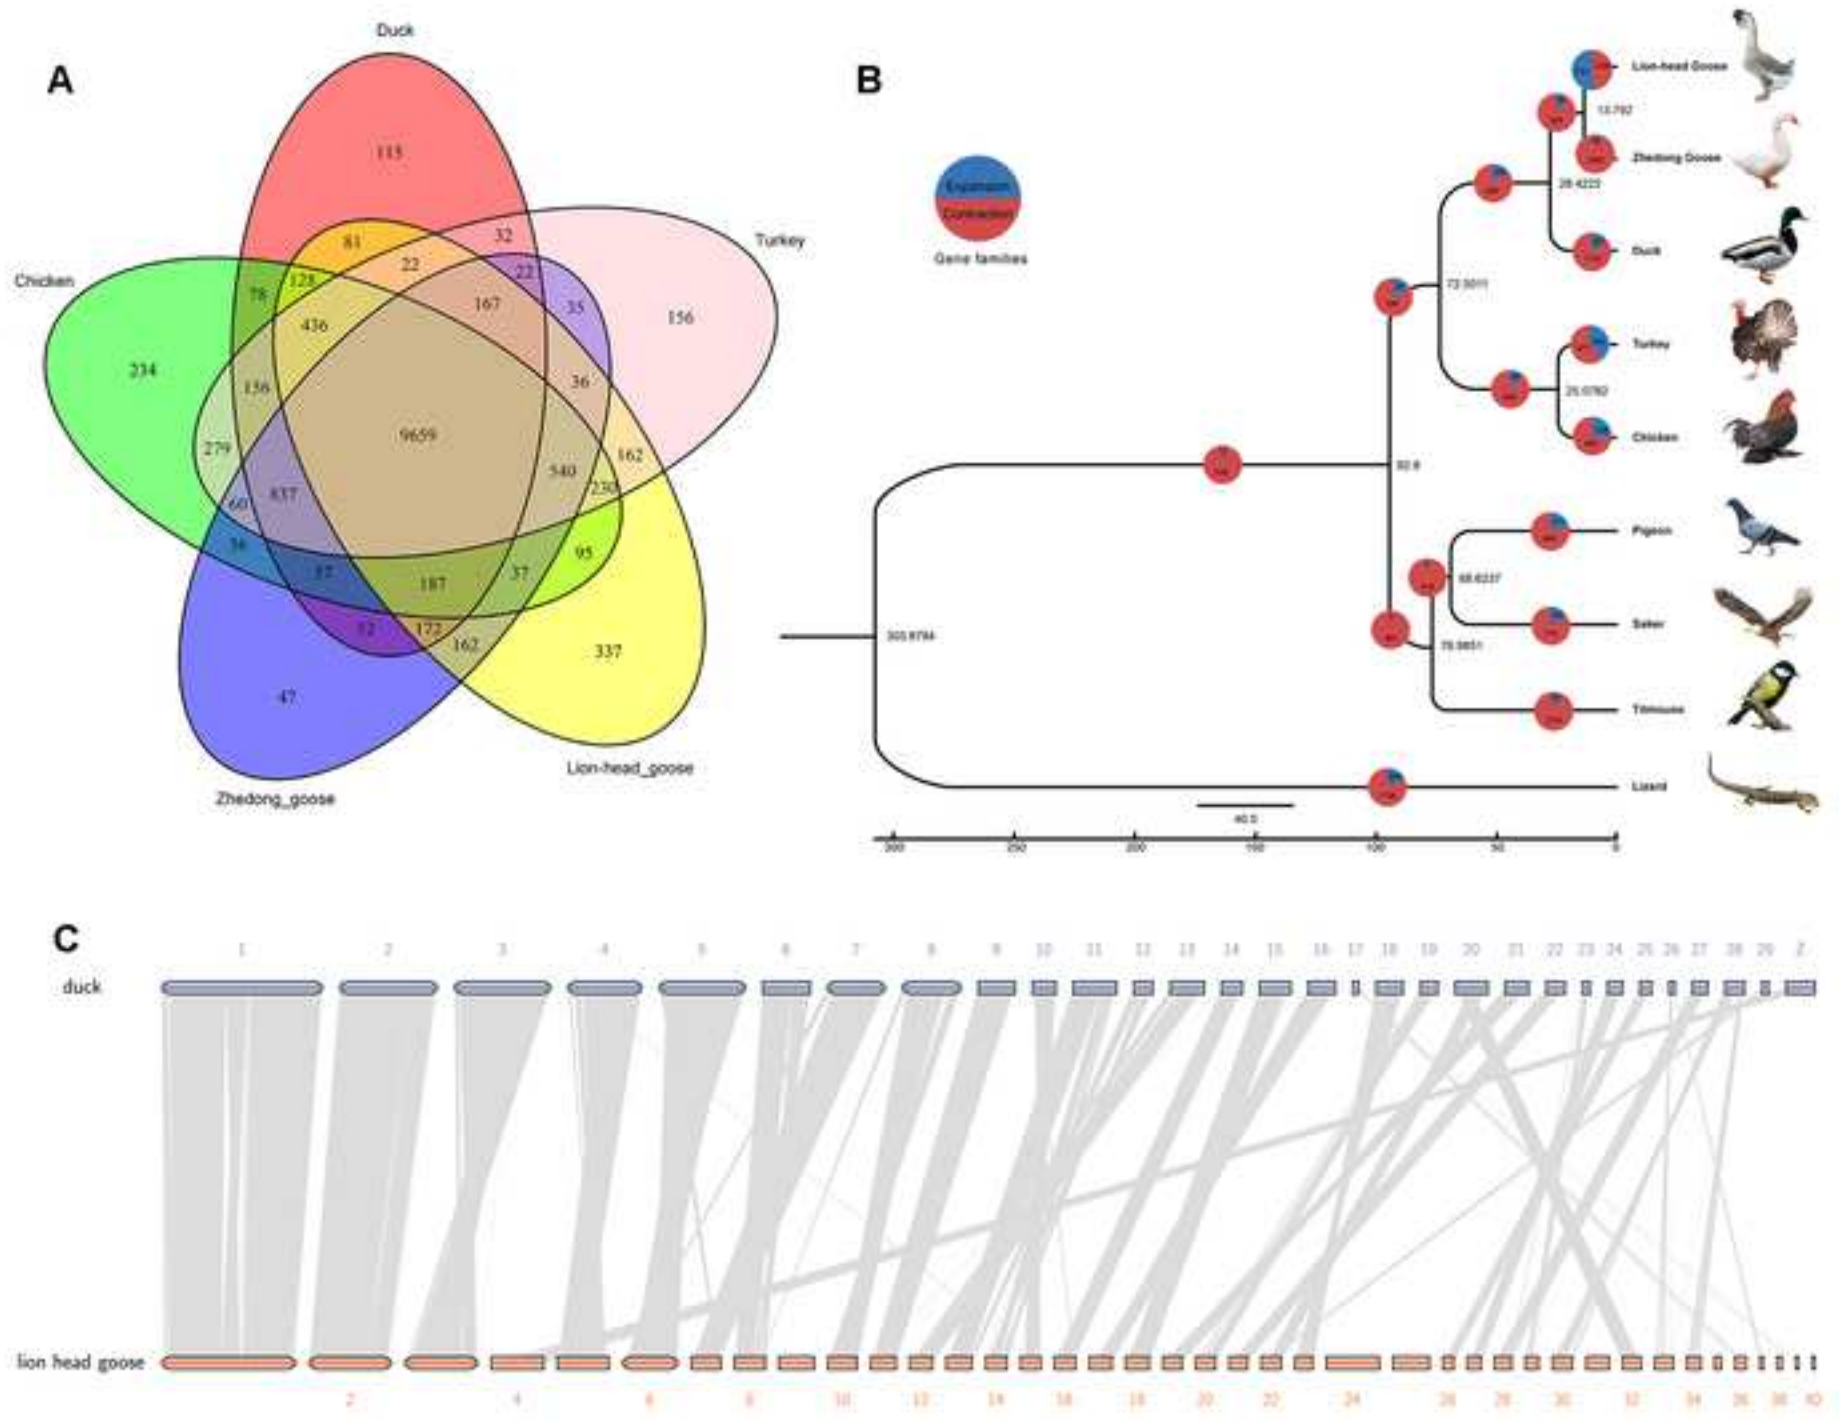

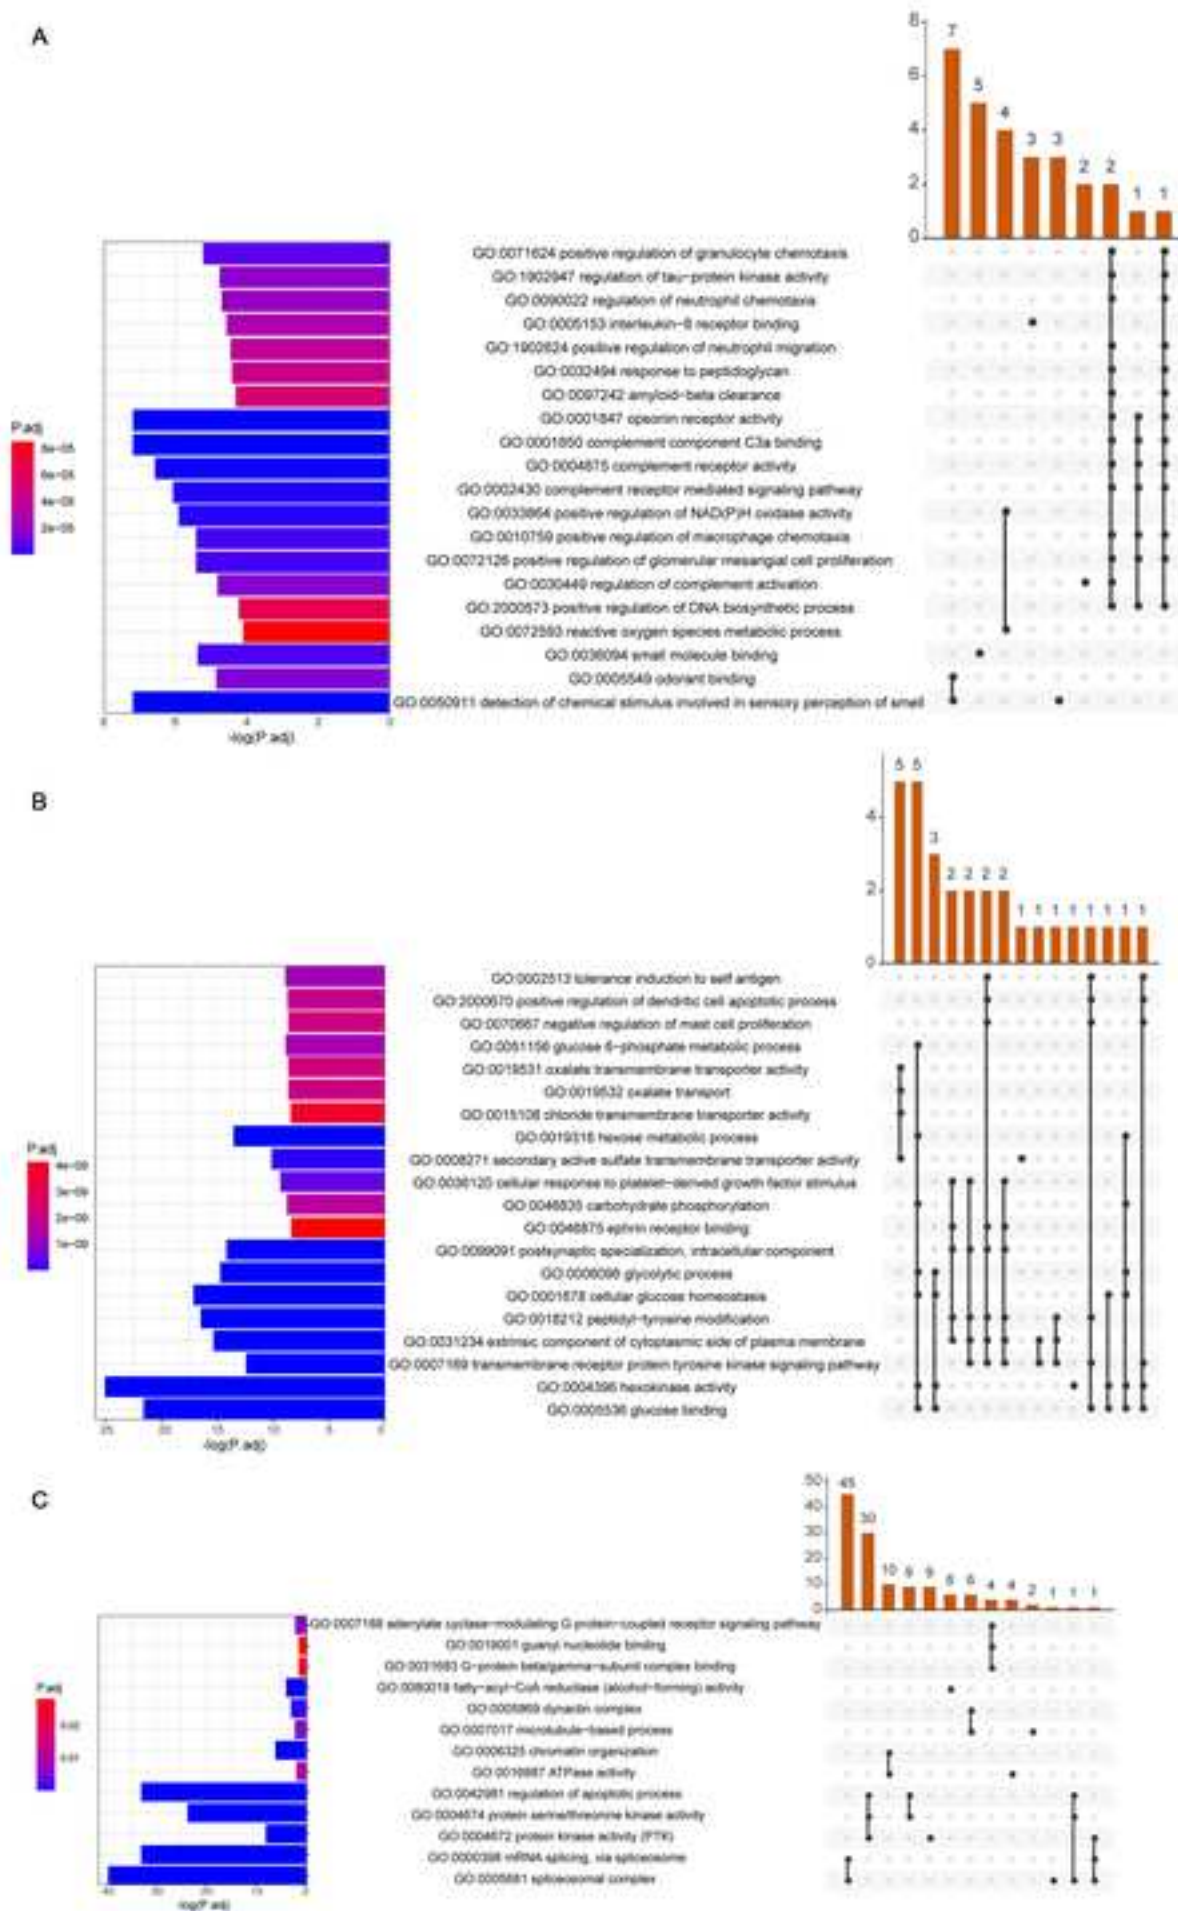

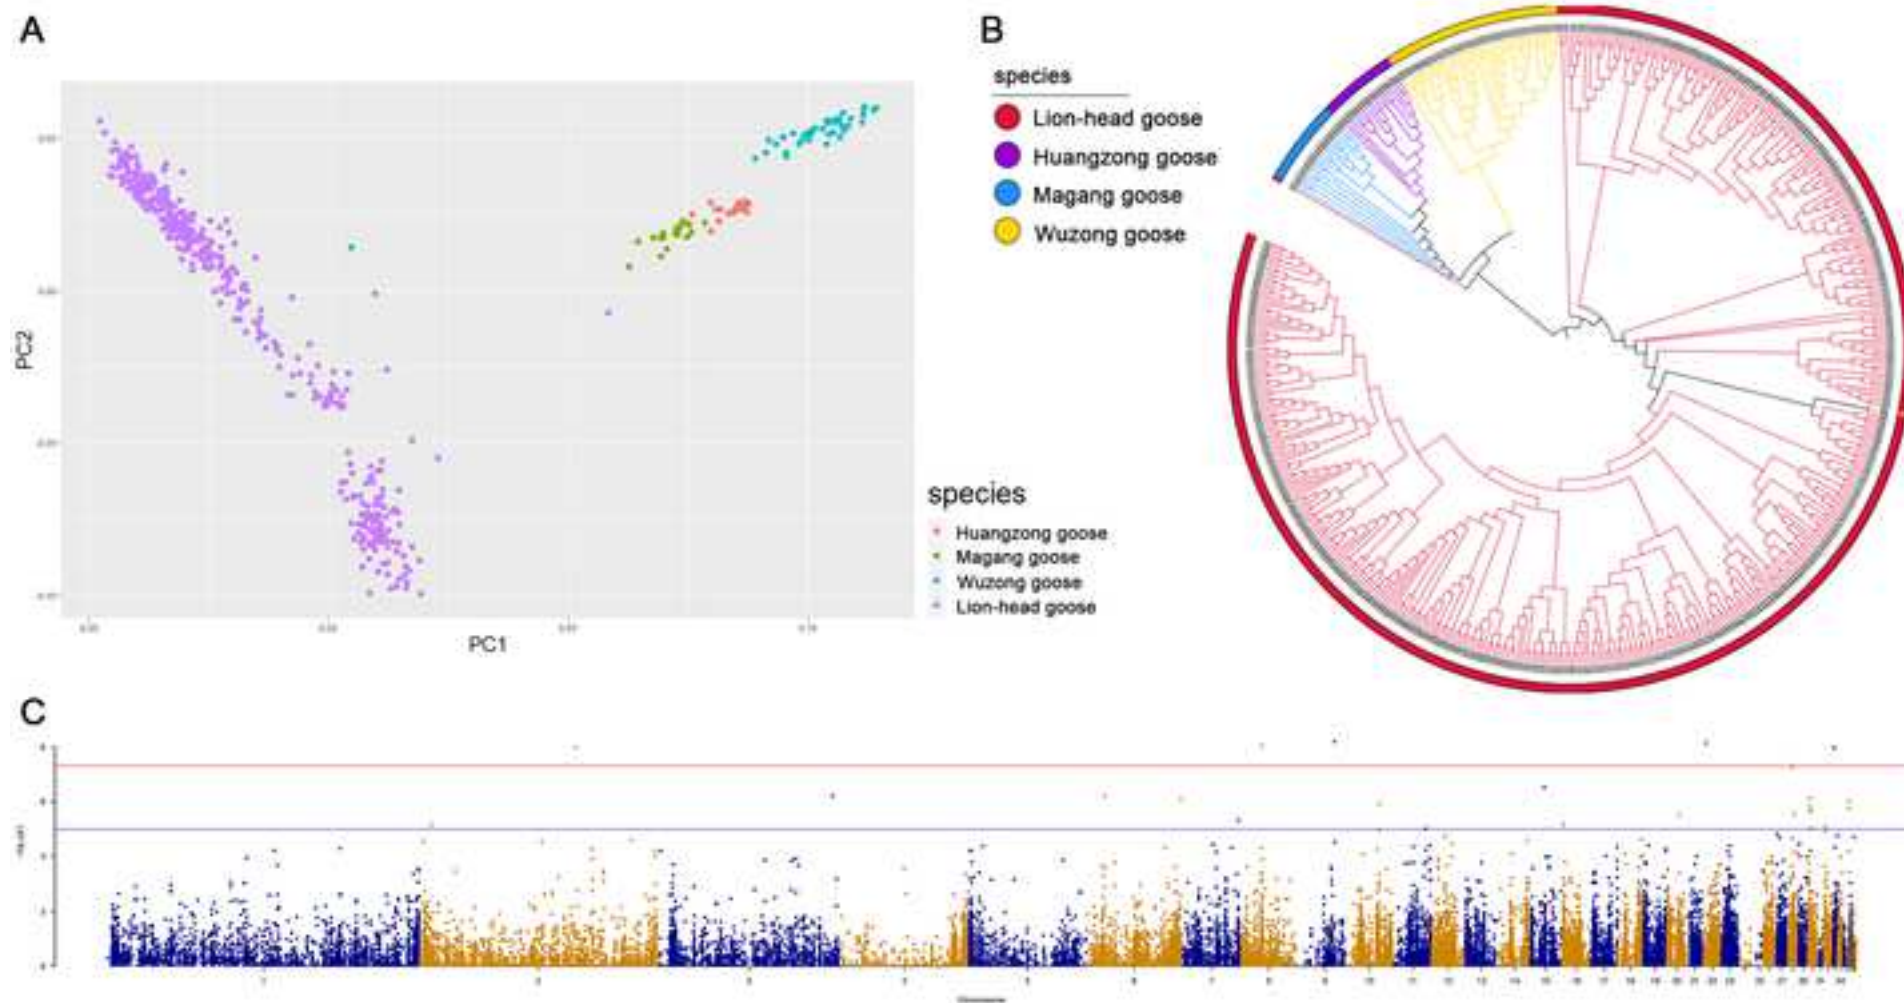

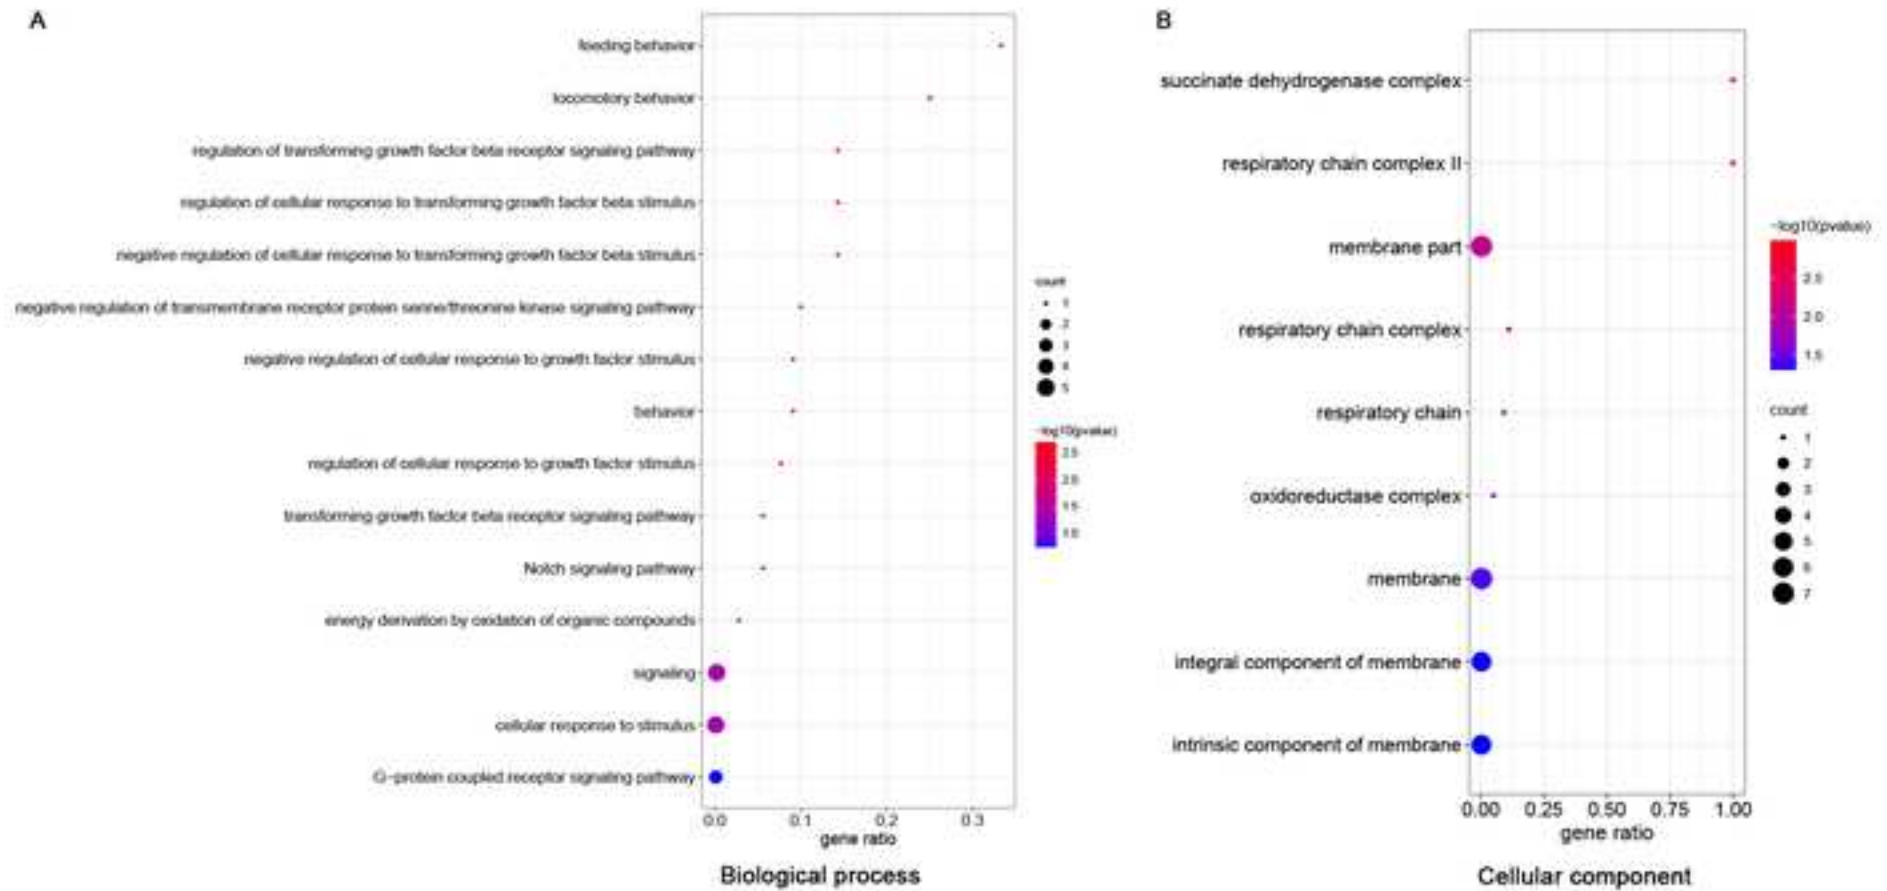



Click here to access/download  
**Supplementary Material**  
10\_circos\_plot\_data.rar







Click here to access/download  
**Supplementary Material**  
renamed\_1f2a4.docx



Supplement: giad003_giga-d-22-00016_revision_2.pdf [file giad003_giga-d-22-00016_revision_2.pdf]
