# Supplementary material for: Chromosome-level genome assembly of goose provides insight into the adaptation and growth of local goose breeds
Source: PubMed Central journal article supplement (PMC9896136; doi:10.1093/gigascience/giad003), 2023-02-03

# GigaScience

## Chromosome-level genome assembly of goose provides insight into the adaptation and growth of local goose breeds --Manuscript Draft--

|                                                      |                                                                                                                                                                                                                                                                                                                                                                                                                                                                                                                                                                                                                                                                                                                                                                                                                                                                                                                                                                                                                                                                                                                                                                                                                                                                                                                                                                                                                                                                                                                                                                                                                                                                                                           |                |
|------------------------------------------------------|-----------------------------------------------------------------------------------------------------------------------------------------------------------------------------------------------------------------------------------------------------------------------------------------------------------------------------------------------------------------------------------------------------------------------------------------------------------------------------------------------------------------------------------------------------------------------------------------------------------------------------------------------------------------------------------------------------------------------------------------------------------------------------------------------------------------------------------------------------------------------------------------------------------------------------------------------------------------------------------------------------------------------------------------------------------------------------------------------------------------------------------------------------------------------------------------------------------------------------------------------------------------------------------------------------------------------------------------------------------------------------------------------------------------------------------------------------------------------------------------------------------------------------------------------------------------------------------------------------------------------------------------------------------------------------------------------------------|----------------|
| <b>Manuscript Number:</b>                            | GIGA-D-22-00016R3                                                                                                                                                                                                                                                                                                                                                                                                                                                                                                                                                                                                                                                                                                                                                                                                                                                                                                                                                                                                                                                                                                                                                                                                                                                                                                                                                                                                                                                                                                                                                                                                                                                                                         |                |
| <b>Full Title:</b>                                   | Chromosome-level genome assembly of goose provides insight into the adaptation and growth of local goose breeds                                                                                                                                                                                                                                                                                                                                                                                                                                                                                                                                                                                                                                                                                                                                                                                                                                                                                                                                                                                                                                                                                                                                                                                                                                                                                                                                                                                                                                                                                                                                                                                           |                |
| <b>Article Type:</b>                                 | Research                                                                                                                                                                                                                                                                                                                                                                                                                                                                                                                                                                                                                                                                                                                                                                                                                                                                                                                                                                                                                                                                                                                                                                                                                                                                                                                                                                                                                                                                                                                                                                                                                                                                                                  |                |
| <b>Funding Information:</b>                          | Key Research and Development Program of Guangdong Province (2020B020222001)                                                                                                                                                                                                                                                                                                                                                                                                                                                                                                                                                                                                                                                                                                                                                                                                                                                                                                                                                                                                                                                                                                                                                                                                                                                                                                                                                                                                                                                                                                                                                                                                                               | Not applicable |
|                                                      | Construction of Modern Agricultural Science and Technology Innovation Alliance in Guangdong Province (2021KJ128, 2020KJ128)                                                                                                                                                                                                                                                                                                                                                                                                                                                                                                                                                                                                                                                                                                                                                                                                                                                                                                                                                                                                                                                                                                                                                                                                                                                                                                                                                                                                                                                                                                                                                                               | Not applicable |
|                                                      | National Modern Agricultural Industry Science and Technology Innovation Center in Guangzhou (2018kczx01)                                                                                                                                                                                                                                                                                                                                                                                                                                                                                                                                                                                                                                                                                                                                                                                                                                                                                                                                                                                                                                                                                                                                                                                                                                                                                                                                                                                                                                                                                                                                                                                                  | Not applicable |
|                                                      | Guangdong Provincial Promotion Project on Preservation and Utilization of Local Breed of Livestock and Poultry (4000-F18260)                                                                                                                                                                                                                                                                                                                                                                                                                                                                                                                                                                                                                                                                                                                                                                                                                                                                                                                                                                                                                                                                                                                                                                                                                                                                                                                                                                                                                                                                                                                                                                              | Not applicable |
|                                                      | Guangdong Basic and Applied Basic Research Foundation (2019A1515012006)                                                                                                                                                                                                                                                                                                                                                                                                                                                                                                                                                                                                                                                                                                                                                                                                                                                                                                                                                                                                                                                                                                                                                                                                                                                                                                                                                                                                                                                                                                                                                                                                                                   | Not applicable |
| <b>Abstract:</b>                                     | <p>Background: Anatidae contains numerous waterfowl species with great economic value, but the genetic diversity basis remains insufficiently investigated. Here, we report a chromosome-level genome assembly of Lion-head goose ( <i>Anser cygnoides</i> ), a native breed in South China, through the combination of PacBio, Bionano and Hi-C technologies. Findings: The assembly had a total genome size of 1.19 Gb, consisting of 1,859 contigs with an N50 length of 20.59 Mb, generating 40 pseudochromosomes, representing 97.27% of the assembled genome, and identifying 21,208 protein-coding genes. Comparative genomic analysis revealed that geese and ducks diverged approximately 28.42 million years ago, and geese have undergone massive gene family expansion and contraction. To identify genetic markers associated with body weight in different geese breeds including Wuzong goose, Huangzong goose, Magang goose and Lion-head goose, a genome-wide association study was performed, yielding an average of 1,520.6 Mb of raw data with detecting 44,858 SNPs. GWAS showed that six SNPs were significantly associated with body weight and 25 were potentially associated. The significantly associated SNPs were annotated as LDLRAD4 , GPR180 , OR , enriching in growth factor receptors regulation pathways. Conclusions: We present the first chromosome-level assembly of the Lion-head goose genome, which will expand the genomic resources of the Anatidae family, providing a basis for adaptation and evolution. Candidate genes significantly associated with different goose breeds may serve to understand the underlying mechanisms of weight differences.</p> |                |
| <b>Corresponding Author:</b>                         | Xinheng Zhang<br>South China Agricultural University<br>Guangzhou, Guangdong CHINA                                                                                                                                                                                                                                                                                                                                                                                                                                                                                                                                                                                                                                                                                                                                                                                                                                                                                                                                                                                                                                                                                                                                                                                                                                                                                                                                                                                                                                                                                                                                                                                                                        |                |
| <b>Corresponding Author Secondary Information:</b>   |                                                                                                                                                                                                                                                                                                                                                                                                                                                                                                                                                                                                                                                                                                                                                                                                                                                                                                                                                                                                                                                                                                                                                                                                                                                                                                                                                                                                                                                                                                                                                                                                                                                                                                           |                |
| <b>Corresponding Author's Institution:</b>           | South China Agricultural University                                                                                                                                                                                                                                                                                                                                                                                                                                                                                                                                                                                                                                                                                                                                                                                                                                                                                                                                                                                                                                                                                                                                                                                                                                                                                                                                                                                                                                                                                                                                                                                                                                                                       |                |
| <b>Corresponding Author's Secondary Institution:</b> |                                                                                                                                                                                                                                                                                                                                                                                                                                                                                                                                                                                                                                                                                                                                                                                                                                                                                                                                                                                                                                                                                                                                                                                                                                                                                                                                                                                                                                                                                                                                                                                                                                                                                                           |                |
| <b>First Author:</b>                                 | Qiqi Zhao                                                                                                                                                                                                                                                                                                                                                                                                                                                                                                                                                                                                                                                                                                                                                                                                                                                                                                                                                                                                                                                                                                                                                                                                                                                                                                                                                                                                                                                                                                                                                                                                                                                                                                 |                |
| <b>First Author Secondary Information:</b>           |                                                                                                                                                                                                                                                                                                                                                                                                                                                                                                                                                                                                                                                                                                                                                                                                                                                                                                                                                                                                                                                                                                                                                                                                                                                                                                                                                                                                                                                                                                                                                                                                                                                                                                           |                |

|                                                |                                                                                                                                                                                                                                                                                                                                                                                                                                                                                                                                                                                                                                                                                                                                                                                                                                                                                                                                                                                                                                                                                                                                                                                                                                                                                                                                                                                                                                                                                                                                                                                                                                                                                                                                                                                                                                                                                                                                                                                                                                                                                                     |
|------------------------------------------------|-----------------------------------------------------------------------------------------------------------------------------------------------------------------------------------------------------------------------------------------------------------------------------------------------------------------------------------------------------------------------------------------------------------------------------------------------------------------------------------------------------------------------------------------------------------------------------------------------------------------------------------------------------------------------------------------------------------------------------------------------------------------------------------------------------------------------------------------------------------------------------------------------------------------------------------------------------------------------------------------------------------------------------------------------------------------------------------------------------------------------------------------------------------------------------------------------------------------------------------------------------------------------------------------------------------------------------------------------------------------------------------------------------------------------------------------------------------------------------------------------------------------------------------------------------------------------------------------------------------------------------------------------------------------------------------------------------------------------------------------------------------------------------------------------------------------------------------------------------------------------------------------------------------------------------------------------------------------------------------------------------------------------------------------------------------------------------------------------------|
| <b>Order of Authors:</b>                       | <p>Qiqi Zhao</p> <p>Junpeng Chen</p> <p>Zi Xie</p> <p>Jun Wang</p> <p>Keyu Feng</p> <p>Wencheng Lin</p> <p>Hongxin Li</p> <p>Zezhong Hu</p> <p>Weiguo Chen</p> <p>Feng Chen</p> <p>Muhammad Junaid</p> <p>Huanmin Zhang</p> <p>Zhenping Lin</p> <p>Qingmei Xie</p> <p>Xinheng Zhang</p>                                                                                                                                                                                                                                                                                                                                                                                                                                                                                                                                                                                                                                                                                                                                                                                                                                                                                                                                                                                                                                                                                                                                                                                                                                                                                                                                                                                                                                                                                                                                                                                                                                                                                                                                                                                                             |
| <b>Order of Authors Secondary Information:</b> |                                                                                                                                                                                                                                                                                                                                                                                                                                                                                                                                                                                                                                                                                                                                                                                                                                                                                                                                                                                                                                                                                                                                                                                                                                                                                                                                                                                                                                                                                                                                                                                                                                                                                                                                                                                                                                                                                                                                                                                                                                                                                                     |
| <b>Response to Reviewers:</b>                  | <p>Dear editor,</p> <p>Thank you very much for your letter dated 19 Sep 2022, and the reviewer's comments concerning our manuscript "Chromosome-level genome assembly of goose provides insight into the adaptation and growth of local goose breeds" (ID: GIGA-D-22-00016).</p> <p>These comments are of great value and very helpful for revising and improving our paper, as well as the importance guiding significant to our research. According to your opinion and request, we have made some revisions to the original manuscript. The responses to the questions are shown below, the black font part is the questions raised by the reviewers, and the dark blue font part is our reply.</p> <p>We have resubmitted the revised version in both PDF and MS word format, on the system for your review. The revised parts are marked in yellow in the MS word file of the revised manuscript for your review.</p> <p>Should you have any questions, please contact us without hesitate.</p> <p>Best wishes,<br/>Xinheng Zhang</p> <p>Questions and Responses:</p> <p>Reviewer reports:</p> <p>Reviewer #3: There are still important aspects of your approach which are not clear, and raise doubts as to how the results where produced and are to be interpreted, and also as to your full appreciation of the in's and out's of GWAS models. Please take in serious consideration the remarks below, if needed you can also consult somebody with experience in the theory and practice of GWAS.</p> <ul style="list-style-type: none"> <li>- The specification of the model for GWAS is still wrong, and contains several incorrect statements. Extensive corrections are needed</li> <li>- Also the software implementation for GWAS gives rise to doubts: Plink does not allow for mixed models, so what about your model? There could not be the <math>Z^*\alpha</math> term, with the associated variance component. Please check carefully, because either the model equation you report in the text (L217) is not the one you used, or you used a different software.</li> </ul> |

L138-139: please add more details on how the Perl script hybridScaffold.pl solved the conflict by performing the split

Response: Thank you for your comments, which we have refined as described below: The nature of the conflict is that there are excessive numbers of unmatched markers on the optical and physical maps. To address this problem, hybrid assemblies were processed using Hybrid Scaffold. Firstly, a pattern search of the genomic sequence was performed to find possible cleavage labels, and the number of labels on matched and unmatched pairs in each linkage was counted and their positions was recorded. Supervised processing is then performed to resolve the positions with conflicting match, then RefAligner is called for iterative sequences merge by pairwise alignment. Finally, the sequence map and genome map are re-matched to the hybrid scaffold and checked again.

L156: please choose between "adapter" and "adaptor"

Response: Thank you for your careful guidance, we have checked and corrected the "adaptor" to "adapter" in full manuscript.

L163-165: please report what you mentioned in the response to my comment also in text: explain that a higher ratio of the mapped intact genes in the assembled genome means a higher completeness/quality/integrity of the assembled genome

Response: Thank you for your comment, we have checked carefully and found that this was a calculation error on our part and have made a correction: We then evaluated the assembled genome with 95.21% single-copy and 1.70% duplicated orthologs from the BUSCO dataset, confirming that 8,081 genes (96.92%) were intact in this genome.

L213: you need to add a reference to Plink. Moreover, which version of Plink did you use?

Response: Thanks to your suggestion, we have added the version number (v1.90b6.21) and the reference (Purcell S et al., 2007) to the text.

L214: " ... covariates in the linear model model for the genotype-phenotype association analysis:  $BW = \mu + Z\alpha + SNP + e$  "

L215: delete "The statistical analysis model for genome-wide association analysis was as follows"

L217: in the model equation, I think that you are using matrix notation: this means that  $\mu$  must be preceded by a vector of 1's, and SNP must be preceded by the corresponding incidence matrix X (indicating for instance the n. of copies of the minor allele in each individual - this is one possible parameterization)

L218: BW is the vector of goose body weights;

L218: Z is not the relationship matrix! Z is the incidence matrix, relating each polygenic effect  $\alpha_i$  to each individual goose i (probably in your case a diagonal identity matrix). The relationship matrix comes into play in the variance of y, specifically of the polygenic (random multigene) effect  $\alpha$  -->  $\text{Var}(\alpha) = G \cdot \sigma_a^2$ .

L219: the SNP effect should be the SNP effect, i.e. the effect for which you are trying to estimate the magnitude and the significance (is the SNP associated with BW?). The SNP effect is specified with an associated design matrix that relates individuals and genotypes/alleles. If you used principal components as covariates in the GWAS model, you need to add an extra term for this

L220: I is not the unit matrix (a matrix of 1's), but it is the identity matrix (a diagonal matrix with 1's only in the diagonal)

L220-221: if you used Plink to perform the association analysis, I think that you could not fit the polygenic/multigene effect, since Plink does not allow to use mixed models with random effects and associated variance components. Please check!!

Response: With regard to the questions relating to GWAS, thank you very much for your professional guidance. In response, we have consulted with the relevant professional technicians and have concluded that there is nothing wrong with our workflow, but only a significant deviation in the textual description in the article, so we have made a complete revision of this section with a view to resolving your confusion. We have sorted out that part of the description, as described below: Based on the SNP set obtained above, the genetic variation was analyzed with individual corresponding body weight information using the two separate and independent models to assess the

|                                                                                                                                                                                                                                                                                                                                                                                                                                    |                                                                                                                                                                                                                                                                                                                                                                                                                                                                                                                                                                                                                                                                                                                                                                                                                                                                                                                                                                                                                                                                                                                                                                                                                                                                                                                                                                                                                                                                                                                                                                                                                                                                                                                                                                                                                                                                                                                                                                                                                                                                                                                |
|------------------------------------------------------------------------------------------------------------------------------------------------------------------------------------------------------------------------------------------------------------------------------------------------------------------------------------------------------------------------------------------------------------------------------------|----------------------------------------------------------------------------------------------------------------------------------------------------------------------------------------------------------------------------------------------------------------------------------------------------------------------------------------------------------------------------------------------------------------------------------------------------------------------------------------------------------------------------------------------------------------------------------------------------------------------------------------------------------------------------------------------------------------------------------------------------------------------------------------------------------------------------------------------------------------------------------------------------------------------------------------------------------------------------------------------------------------------------------------------------------------------------------------------------------------------------------------------------------------------------------------------------------------------------------------------------------------------------------------------------------------------------------------------------------------------------------------------------------------------------------------------------------------------------------------------------------------------------------------------------------------------------------------------------------------------------------------------------------------------------------------------------------------------------------------------------------------------------------------------------------------------------------------------------------------------------------------------------------------------------------------------------------------------------------------------------------------------------------------------------------------------------------------------------------------|
|                                                                                                                                                                                                                                                                                                                                                                                                                                    | <p>significance of SNP effects in Plink (v 1.90b6.21) [38]. In the first model, top 20 PCs in the PCA analysis were used as covariates, and a linear analysis was performed on sample variances with the following parameters: --linear --allow-extra-chr --allow-no-sex --covar. In the second model, an asymptotic Wald test analysis was carried out with the following parameters: --assoc --allow-extra-chr --allow-no-sex. Finally, SNPs with Bonferroni corrected p-values less than 0.05 were taken as significant loci in the SNPs obtained from the two models above, and these loci were annotated. The annotated genes were subjected to GO enrichment analysis using the genomic genes of Lion-head goose as background.</p> <p>For the statistical model problem, we rechecked the relevant information and found that the model should be</p> $Y = b_0 + b_1 \cdot \text{ADD} + b_2 \cdot \text{COV1} + b_3 \cdot \text{COV2} + \dots + b_{21} \cdot \text{COV20} + b_{22} \cdot \text{ADDxCOV1} + b_{23} \cdot \text{ADDxCOV2} + \dots + b_{41} \cdot \text{ADDxCOV20} + e;$ <p>where <math>b_0</math>–<math>b_{41}</math> are coefficients, COV x are the top 20 PCs of the PCA as the covariates; e is the residual.</p> <p>L223: when you use Bonferroni correction, you can either divide the threshold (e.g. <math>\alpha = 0.05</math>) by the number of independent tests (e.g. the n. of SNP markers), or you can keep alpha and multiply the p-values obtained from the GWAS model (<math>p\text{-value} \leq \alpha/m</math>). Which one did you do? Did you start with <math>\alpha = 10^{-6}</math> and then applied Bonferroni correction to this initial threshold? What was the number of test (markers) "m" that you used for correction?</p> <p>Response: Thank you for your comments. We keep alpha and multiply the p-values obtained from the GWAS model (<math>p\text{-value} \leq \alpha/m</math>). Number of test (markers) "m" is the number of population SNPs used in GWAS (89716). Bonferroni correction was done by the function <code>p.adjust()</code> in R.</p> |
| <b>Additional Information:</b>                                                                                                                                                                                                                                                                                                                                                                                                     |                                                                                                                                                                                                                                                                                                                                                                                                                                                                                                                                                                                                                                                                                                                                                                                                                                                                                                                                                                                                                                                                                                                                                                                                                                                                                                                                                                                                                                                                                                                                                                                                                                                                                                                                                                                                                                                                                                                                                                                                                                                                                                                |
| <b>Question</b>                                                                                                                                                                                                                                                                                                                                                                                                                    | <b>Response</b>                                                                                                                                                                                                                                                                                                                                                                                                                                                                                                                                                                                                                                                                                                                                                                                                                                                                                                                                                                                                                                                                                                                                                                                                                                                                                                                                                                                                                                                                                                                                                                                                                                                                                                                                                                                                                                                                                                                                                                                                                                                                                                |
| Are you submitting this manuscript to a special series or article collection?                                                                                                                                                                                                                                                                                                                                                      | No                                                                                                                                                                                                                                                                                                                                                                                                                                                                                                                                                                                                                                                                                                                                                                                                                                                                                                                                                                                                                                                                                                                                                                                                                                                                                                                                                                                                                                                                                                                                                                                                                                                                                                                                                                                                                                                                                                                                                                                                                                                                                                             |
| <p><b>Experimental design and statistics</b></p> <p>Full details of the experimental design and statistical methods used should be given in the Methods section, as detailed in our <a href="#">Minimum Standards Reporting Checklist</a>. Information essential to interpreting the data presented should be made available in the figure legends.</p> <p>Have you included all the information requested in your manuscript?</p> | Yes                                                                                                                                                                                                                                                                                                                                                                                                                                                                                                                                                                                                                                                                                                                                                                                                                                                                                                                                                                                                                                                                                                                                                                                                                                                                                                                                                                                                                                                                                                                                                                                                                                                                                                                                                                                                                                                                                                                                                                                                                                                                                                            |
| <p><b>Resources</b></p> <p>A description of all resources used, including antibodies, cell lines, animals and software tools, with enough information to allow them to be uniquely identified, should be included in the Methods section. Authors are strongly</p>                                                                                                                                                                 | Yes                                                                                                                                                                                                                                                                                                                                                                                                                                                                                                                                                                                                                                                                                                                                                                                                                                                                                                                                                                                                                                                                                                                                                                                                                                                                                                                                                                                                                                                                                                                                                                                                                                                                                                                                                                                                                                                                                                                                                                                                                                                                                                            |

|                                                                                                                                                                                                                                                                                                                                                                                                                                                                                                                                                         |            |
|---------------------------------------------------------------------------------------------------------------------------------------------------------------------------------------------------------------------------------------------------------------------------------------------------------------------------------------------------------------------------------------------------------------------------------------------------------------------------------------------------------------------------------------------------------|------------|
| <p>encouraged to cite <a href="#">Research Resource Identifiers</a> (RRIDs) for antibodies, model organisms and tools, where possible.</p> <p>Have you included the information requested as detailed in our <a href="#">Minimum Standards Reporting Checklist</a>?</p>                                                                                                                                                                                                                                                                                 |            |
| <p><b>Availability of data and materials</b></p> <p>All datasets and code on which the conclusions of the paper rely must be either included in your submission or deposited in <a href="#">publicly available repositories</a> (where available and ethically appropriate), referencing such data using a unique identifier in the references and in the “Availability of Data and Materials” section of your manuscript.</p> <p>Have you have met the above requirement as detailed in our <a href="#">Minimum Standards Reporting Checklist</a>?</p> | <p>Yes</p> |

# 1 **Chromosome-level genome assembly of goose provides insight into** 2 **the adaptation and growth of local goose breeds**

3 **Qiqi Zhao<sup>1,3,5,7+</sup>, Zhenping Lin<sup>2+</sup>, Junpeng Chen<sup>2</sup>, Zi Xie<sup>1,3,5</sup>, Jun Wang<sup>4</sup>, Keyu Feng<sup>1,3,5</sup>, Wencheng**  
4 **Lin<sup>1,3,5,7</sup>, Hongxin Li<sup>1,3,5,7</sup>, Zezhong Hu<sup>1</sup>, Weiguo Chen<sup>1,3,5,7</sup>, Feng Chen<sup>1,3,7</sup>, Muhammad Junaid<sup>4</sup>,**  
5 **Huanmin Zhang<sup>6</sup>, Qingmei Xie<sup>1,3,5,7\*</sup>, Xinheng Zhang<sup>1,3,5,7\*</sup>**

6 <sup>1</sup>Heyuan Branch, Guangdong Provincial Laboratory of Lingnan Modern Agricultural Science and  
7 technology, College of Animal Science, South China Agricultural University, Guangzhou, Guangdong  
8 510642, China; <sup>2</sup>Shantou Baisha Research Institute of Original Species of Poultry and Stock, Shantou,  
9 Guangdong 515000, China; <sup>3</sup>Department of Science and Technology of Guangdong Province, Key  
10 Laboratory of Animal Health Aquaculture and Environmental Control, Guangzhou, Guangdong 510642,  
11 China; <sup>4</sup>College of Marine Sciences, South China Agricultural University, Guangzhou, Guangdong,  
12 510642, China; <sup>5</sup>Guangdong Engineering Research Center for Vector Vaccine of Animal Virus,  
13 Guangzhou, 510642, China; <sup>6</sup>Avian Disease and Oncology Laboratory, Agriculture Research Service,  
14 United States Department of Agriculture, East Lansing, MI, 48823, USA and <sup>7</sup>Guangdong Provincial  
15 Key Lab of AgroAnimal Genomics and Molecular Breeding, College of Animal Science, South China  
16 Agricultural University, Guangzhou, Guangdong 510642, China

17 \* Correspondence address:

18 Qingmei Xie and Xinheng Zhang, College of Animal Science, South China Agricultural University,  
19 Guangzhou, China. E-mails: qmx@scau.edu.cn (Q.X.); xhzhang@scau.edu.cn (X.Z.)

20 +These authors contributed equally to this work.

21 **running title:** Goose chromosome-level Genome Assembly

22 Qiqi Zhao [0000-0002-7661-9171];

23 Xinheng Zhang [0000-0001-6409-3160]

24 **Abstract**

25 **Background:** *Anatidae* contains numerous waterfowl species with great economic value, but the  
26 genetic diversity basis remains insufficiently investigated. Here, we report a chromosome-level genome  
27 assembly of Lion-head goose (*Anser cygnoides*), a native breed in South China, through the combination  
28 of PacBio, Bionano and Hi-C technologies. **Findings:** The assembly had a total genome size of 1.19 Gb,  
29 consisting of 1,859 contigs with an N50 length of 20.59 Mb, generating 40 pseudochromosomes,  
30 representing 97.27% of the assembled genome, and identifying 21,208 protein-coding genes.  
31 Comparative genomic analysis revealed that geese and ducks diverged approximately 28.42 million  
32 years ago, and geese have undergone massive gene family expansion and contraction. To identify genetic  
33 markers associated with body weight in different geese breeds including Wuzong goose, Huangzong  
34 goose, Magang goose and Lion-head goose, a genome-wide association study was performed, yielding  
35 an average of 1,520.6 Mb of raw data with detecting 44,858 SNPs. GWAS showed that six SNPs were  
36 significantly associated with body weight and 25 were potentially associated. The significantly  
37 associated SNPs were annotated as *LDLRAD4*, *GPR180*, *OR*, enriching in growth factor receptors  
38 regulation pathways. **Conclusions:** We present the first chromosome-level assembly of the Lion-head  
39 goose genome, which will expand the genomic resources of the *Anatidae* family, providing a basis for  
40 adaptation and evolution. Candidate genes significantly associated with different goose breeds may  
41 serve to understand the underlying mechanisms of weight differences.

42 **Keywords:** Lion-head goose, Genome assembly, Comparative genome, Genome-wide association study

43

## 44 **Introduction**

45 The *Anatidae* is a family of the ancient *Aves* class with order *Anseriformes*, containing 43 genera  
46 and 174 species, including most birds of *Anseriformes* order, such as ducks, geese, swans, and is the  
47 most prominent family of swimming birds [1]. Physical characteristics and features vary significantly  
48 among species, making the *Anatidae* family rich in diversity and specificity. *Anatidae* adults are usually  
49 herbivores, feeding on a variety of aquatic plants, which are well suited to sustainable production  
50 practices thereby reducing competition for human food; and some species are even used for crop weeds  
51 and pests control [1, 2]. For a long time, duck and goose feathers have been popular in pillows, quilts  
52 and coats [3]. Several species in the genus *Anser* are commercially important and domesticated as  
53 poultry because of their meat-producing performance and natural stuffing for warm clothing and  
54 bedding. According to archaeological evidence, geese were domesticated around 6,000 years ago near  
55 the Mediterranean Sea, and later spread around the world due to human activities [4]. It is widely  
56 believed that *Anser cygnoides* (NCBI:txid8845) is the ancestor of the Chinese goose (*Anser cygnoides*  
57 *domesticus*) with a domestication history of more than 3,000 years [1]. After artificial domestication,  
58 the domestic goose has increased its cold tolerance and roughage-resistance, but its wings are degraded  
59 and weakened in flight, unable to travel long distances [1]. Egg-laying rate and goslings survival rate  
60 are also improved compared to wild swans, and the lifespan is longer [5]. Furthermore, overfeeding can  
61 cause foie gras to be at least three-fold larger than the normal size while the goose remains healthy,  
62 making the goose a good model to study human liver steatosis [6]. Chinese domestic geese is a natural  
63 gene pool containing local breeds of diverse phenotypes, and adult domestic geese from similar region  
64 vary greatly in weight [7]. For example, the Lion-head goose in Shantou (116°14'-117°19' E, 23°02'-  
65 23°38' N), Guangdong Province, can weigh more than 9 kg, while in the Wuzong goose from Qingyuan  
66 (111°55'-113°55' E, 23°31'-25°12' N), Guangdong Province, the average weight is only about 3 kg [8,  
67 9]. The Lion-head goose has a large body, a deep and wide head, and large sarcomas (five sarcomas) on  
68 the front and side of the face (**Fig. 1**). The adult male goose weighs 9-10 kg and the female goose 7.5-9  
69 kg, grows rapidly and has rich muscles. Wuzong goose is a small goose species with a distinct band of



70 black plumage from neck to back. The gander weighs 3-3.5kg and the female weighs 2.5-3kg, with wide  
71 and short body, flat back, and thin and short feet. Magang goose is a medium-sized goose species, with  
72 a long head, wide beak, rectangular body, a gray-black bristle-like feathers on the back of the neck, gray  
73 brown breast feathers and white belly feathers. Adult weight is 4-5 kg for males and 3-4 kg for females.  
74 Huangzong goose has a compact body, from the top of the head to the back of the neck has a brownish  
75 yellow feather belt, shaped like a horse's mane. The chest feather is gray yellow, the belly feather is  
76 white, the beak and sarcoma is black. Adult males weigh 3-3.5 kg, females 2.5-3 kg. However, the  
77 mechanisms for such differences have not been clarified, let alone being resolved at the genomic level.  
78 Therefore, a complete, continuous and accurate reference genome is essential, for deciphering genomic  
79 diversity, evolutionary and adaptive processes, improving production efficiency and even develop better  
80 tools for breeding to promote the development of goose industry.

81 High-quality genome assembly sequences enable us to comprehensively and scientifically decode  
82 the genetic diversity of species, explore disease mechanisms, and understand species evolution. Recently,  
83 Pacbio has offered technology that can generate reads several thousand bases in size, and these long  
84 reads can span repetitive regions [10]. Although these long reads have a high error rate, they can be  
85 integrated with Illumina's short reads to improve sequencing accuracy [11]. In addition, new scaffolding  
86 techniques, such as high-throughput chromosome conformation capture (Hi-C), allow the genome to be  
87 assembled to the level of whole chromosomes [12]. Pacbio single molecule real-time (SMRT)  
88 sequencing technology has been extensively used in the study of human diseases such as tuberculosis  
89 and influenza virus [13], as well as in the study of species evolution, such as the centromere of the  
90 human Y chromosome [14]. Bionano optical mapping technology has advantages in obtaining highly  
91 repetitive sequences and detecting genomic structural variants, which is helpful for remote sequencing  
92 of sequence overlap clusters[15]. Bionano has become a powerful tool for genome assembly, a 5.1 Mbp  
93 inversion was found in the genomes of a patient with Duchenne muscular dystrophy[16].

94 In this study, we report the genome assembly at the chromosome level in Lion-head geese for the  
95 first time using combined data generated by four advanced technologies, Illumina, SMRT, Bionano, and  
96 Hi-C. In addition, we investigated the relationship between body weight and genetic variations in Lion-

97 head goose, Wuzong goose, Huangzong goose and Magang goose by genome-wide association analysis,  
98 trying to identify the genes involved in body weight determination from different species. These will  
99 offer valuable resources for facilitating genetic research and the improvement of the species and for  
100 studying speciation and evolution in geese.

## 101 **Methods**

### 102 **Animal selection**

103 An adult healthy purebred male Lion-head goose (*Anser cygnoides*) with classical traits was selected for  
104 whole-genome sequencing and conducting *de novo* assembly from Shantou Baisha Research Institute  
105 of Original Species of Poultry and Stock. Blood and eight tissues (i.e., brain, pharyngeal pouch, head  
106 sarcoma, spleen, liver, chest muscle, kidney, and heart) from another four healthy adult individuals were  
107 collected for RNA-seq analysis. All applicable institutional and national guidelines for the care and use  
108 of animals were followed. All the animal work in this study was approved by the South China  
109 Agricultural University Committee for Animal Experiments (approval ID: SYXK 2019-0136). All the  
110 research procedures and animal care activities were conducted based on the principles stated in the  
111 National and Institutional Guide for the Care and Use of Laboratory Animals.

### 112 **Genome survey library construction and sequencing**

113 To survey the genome profile, high-quality genomic DNA was extracted from the blood of the reference  
114 individual for whole-genome sequencing using the Qiagen Blood and Cell Culture DNA Midi Kit  
115 according to the manufacturer's instructions. For the quality control of purity, concentration, and  
116 integrity, we used Qubit 2.0 Fluorometry (Life Technologies, USA), NanoDrop 2000 spectrophotometer  
117 (Thermo Scientific), and pulse-field gel electrophoresis (Bio-rad CHEF-DR II), respectively. The  
118 following steps used for DNA extraction and quality control were similar. The short paired-end Illumina  
119 DNA library was constructed using the Illumina HiSeq X ten system (Illumina HiSeq X Ten,  
120 RRID:SCR\_016385) with the paired-end 350 bp sequencing strategy. After performing the sequencing  
121 and obtaining the data, the k-mer analysis of reads for the genome survey was calculated by the Jellyfish  
122 (Jellyfish, RRID:SCR\_005491) program with the default parameters. Additionally, the genome size,

123 heterozygosity ratio, and repeat sequence ratio were calculated with the GenomeScope (GenomeScope,  
124 RRID:SCR\_017014) tool based on the k-mer frequency of 17.

### 125 **Genome sequencing and assembly strategies**

126 A 40 kb *de novo* library for SMRT genome sequencing was constructed using the PacBio Sequel II  
127 platform (PacBio Sequel II System, RRID:SCR\_017990) (Pacific Biosciences, USA). All of these reads  
128 were used for contigs assembly. A scalable and accurate long-read assembly tool, Canu (Canu,  
129 RRID:SCR\_015880) v1.8 [17], was employed to correct and assemble the PacBio reads with the listed  
130 parameters (minThreads = 4, genome size = 1200m, minOverlapLength = 700, minReadLength = 1000).  
131 The resulting contigs and corrected reads were used as inputs for HERA [18] to fill the gaps and produce  
132 longer contigs with default parameters. After that, Illumina paired-end clean data were mapped to the  
133 corrected contigs with the Burrows-Wheeler Aligner (BWA, RRID:SCR\_010910) [19], and the results  
134 were filtered by Q30 with Samtools (SAMTOOLS, RRID:SCR\_002105) v1.8 [20]. Finally, Pilon (Pilon,  
135 RRID:SCR\_014731) v1.22 [21] was used to polish the assembly and enhance the base accuracy of the  
136 contigs.

137 Physical optical genome maps from BioNano were used to improve the assembly quality of the  
138 genome, with the ultimate goal of generating a chromosome-scale assembly. Nuclear DNA was  
139 extracted from the blood sample of the reference individual and digested with nickase Direct Labeling  
140 Enzyme I. After labeling, repairing and staining reactions, DNA was loaded onto the Saphyr Chip for  
141 sequencing to generate BioNano molecules. Afterward, the data were assembled with RefAligner and  
142 Assembler of BioNano Solve. The scaffold was established using BioNano Solve with HERA's contigs  
143 and a BioNano genome map. When encountering a conflict between a contig and the BioNano genome  
144 map, the contig was split by the program "hybridScaffold.pl" to correct the false connection. In brief, a  
145 pattern search of the genomic sequence was first performed to find possible cleavage labels, and the  
146 number of labels on matched and unmatched pairs in each linkage was counted and their positions was  
147 recorded. Supervised processing is then performed to resolve the positions with conflicting match, then  
148 RefAligner is called for iterative sequences merge by pairwise alignment. Finally, the sequence map and  
149 genome map are re-matched to the hybrid scaffold and checked again.

150 For Hi-C library, fresh blood was vacuum-infiltrated with 2% formaldehyde solution and then used  
151 for cross-link action. Later nuclear DNA was isolated from the reference animal and digested with the  
152 restriction enzyme Mbo I. The Hi-C library with insertion sizes of 350 bp was constructed and sequenced  
153 on the Illumina HiSeq X Ten instrument. The Hi-C reads were assigned to the scaffolds by Juicer (Juicer,  
154 RRID:SCR\_017226) [22]. The scaffolds were further clustered, ordered, and oriented to the  
155 chromosome-level scaffolds by 3D-DNA [23]. Thus, a heatmap of Hi-C chromosomal interaction was  
156 created using the HiC-pro software (HiC-Pro, RRID:SCR\_017643) [24].

### 157 **RNA-Seq and transcripts assembly**

158 RNA-seq was conducted on blood and eight different tissues (i.e., brain, pharyngeal pouch, head  
159 sarcoma, spleen, liver, chest muscle, kidney, and heart) from four healthy adult Lion-head goose. Total  
160 RNA was extracted from four individuals using the TRIZOL reagent and purified following the  
161 manufacturer's protocols. The concentration and quality of the isolated RNA were assessed using the  
162 Nanodrop Spectrophotometer, Qubit 2.0 Fluorometry, and the Agilent 2100 bioanalyzer (Agilent  
163 Technologies, USA). Libraries construction and sequencing were performed using the Illumina  
164 NovaSeq 6000 platform (Illumina NovaSeq 6000 Sequencing System, RRID:SCR\_016387). Raw RNA-  
165 seq data with 150 bp paired-end reads were trimmed for quality using Trimmomatic (Trimmomatic,  
166 RRID:SCR\_011848) [25]. Thus, the Illumina sequence adapters were removed, then low-quality reads  
167 based on Phred scores, adapter-polluted reads containing >5 adapter-polluted bases, and those  
168 containing N > 5% were trimmed, using the following parameters: LEADING:3 TRAILING:3  
169 SLIDINGWINDOW:4:15 -threads 20 MINLEN:50. Furthermore, Trinity [26] was used to *de novo*  
170 assemble the data after quality filtering. To remove redundant sequences, CD-HIT (CD-HIT,  
171 RRID:SCR\_007105) [27] was employed to remove highly identical transcript isoforms, retaining only  
172 the longest one. After filtering, the RNA-seq reads were mapped to the assembled genome using the  
173 default parameters of STAR [28].

### 174 **Assembly evaluation**

175 Finishing the genome assembly, quality control for the assembly's quality, accuracy, and integrity was  
176 assessed by Benchmarking Universal Single-Copy Orthologs (BUSCO, RRID:SCR\_015008), v 5.3.0,

177 using aves\_odb10 as the query with parameters: -l aves\_odb10 -m genome -c 5 [29, 30].

## 178 **Genome annotation**

179 The genome assembly was annotated by MAKER (MAKER, RRID:SCR\_005309), mainly including  
180 gene annotation and repeat annotation. The detailed pipeline was based on proteins from the Uniprot,  
181 the *de novo* assembly of RNA-seq data, and the total proteins of the relative species *Anser cygnoides*  
182 [31]. The transposable elements (TE) associated genes that were filtered out by the TEseeker database,  
183 and the results were used to conduct functional annotation using InterProScan. The repeat sequencing  
184 library was identified and annotated by a combination of LTR-FINDER and RepeatModeler  
185 (RepeatModeler, RRID:SCR\_015027). RepeatMasker and the query species “Chicken” were used to  
186 mask the repeats in the assembly, based on the Repbase database and the previous repeat sequence library.  
187 Tandem repeats were discovered by the Tandem Repeats Finder [32].

## 188 **Gene families and phylogenetic analysis**

189 Interspecific syntenic blocks between the Lion-head goose and duck were explored using  
190 MCscan (MCScan, RRID:SCR\_017650) [33] after coding sequence alignment by  
191 BLASTn (BLASTN, RRID:SCR\_001598). The same method was used for intraspecific collinearity  
192 analysis. To gain insight into the gene family evolution of the goose, we compared the gene families of  
193 Lion-head goose with the genomes of the following avian species: Zhedong white goose (*Anser*  
194 *cygnoides*), duck (*Anas platyrhynchos*), turkey (*Meleagris gallopavo*), chicken (*Gallus gallus*), pigeon  
195 (*Columba livia*), saker (*Falco cherrug*), titmouse (*Pseudopodoces humilis*), and green lizard (*Anolis*  
196 *carolinensis*). Initially, alternative splicing and genes encoding less than 50 amino acids with a  
197 proportion of stop codon greater than 20% were filtered; meanwhile, the longest transcript of genes with  
198 multiple isoforms was retained to represent the gene. Similarity relationships among the protein  
199 sequences of species were aligned by BLASTP (BLASTP, RRID:SCR\_001010) algorithm and clustered  
200 using OrthoMCL methodology with an expansion coefficient of 1.5 to obtain single- and multiple-copy  
201 gene families, and specific gene families of Lion-head goose. The sequences of the single-copy gene  
202 families were employed to perform multiple alignments by MUSCLE (MUSCLE,

203 RRID:SCR\_011812). Then RAxML (RAxML, RRID:SCR\_006086) [34] was used to construct a  
204 phylogenetic tree of nine species, with the green lizard (*Anolis carolinensis*) being designated an  
205 outgroup. Taking the divergence time of the pigeon and turkey (92.9Mya) as the calibration, the r8s (r8s,  
206 RRID:SCR\_021161) [35] software was used to estimate the divergence time of the species and construct  
207 ultrametric trees. After filtering out gene families with gene counts of more than 100 in some individual  
208 species, CAFÉ (CAFE, RRID:SCR\_005983) [36] was employed to detect gene families that had  
209 undergone expansion or contraction per million years independently along each branch of the  
210 phylogenetic tree. Subsequently, a gene ontology (GO) enrichment analysis of gene families was  
211 performed using the clusterProfiler package in R [37].

### 212 **Experimental sample processing and variant detection for Genome-wide association study**

213 Blood samples of 514 geese (including Lion-head goose, Wuzong goose, Huangzong goose and Magang  
214 goose) were collected and stored in 2 mL tubes containing ACD anticoagulant for DNA extraction, and  
215 the weight of the geese was recorded. DNA was extracted from blood samples using the HiPure Blood  
216 DNA Mini Kit (Magenbio, Guangzhou, China). The samples that passed the quality testing were  
217 subjected to library construction using Easy DNA Library Prep Kit (MGI, Shenzhen, China) and paired-  
218 end 100 sequencing using BGISEQ 500 (BGISEQ-500, RRID:SCR\_017979). Raw data were filtered for  
219 adapters and low quality reads using SOAPnuke software, low quality threshold parameters set to 20,  
220 and the filtered sequences were compared with the constructed goose reference genome using BWA  
221 software with parameters: mem, -M. Then variant detection was performed using Samtools, GATK4  
222 software with parameters: HaplotypeCaller -ERC GVCF. SNP variants were filtered based on a  
223 minimum allele frequency threshold of 0.05, a Hardy Weinberg equilibrium test significance threshold  
224 of  $10^{-7}$ , and a max missing rate threshold of 0.7. Principal component analysis (PCA) was performed  
225 and plotted with R. To understand relationships among groups of the samples, the phylogenetic trees  
226 were constructed using SNP data with Phylip software.

### 227 **Genome-wide association study**

228 Based on the SNP set obtained above, the genetic variation was analyzed with individual corresponding  
229 body weight information using the two separate and independent models to assess the significance of

230 SNP effects in Plink (PLINK, RRID:SCR\_001757) v1.90b6.21 [38]. In the first model, top 20 PCs from  
231 the PCA analysis were used as covariates, and a linear analysis was performed on sample variances with  
232 the following parameters: --linear --allow-extra-chr --allow-no-sex --covar. In the second model, an  
233 asymptotic Wald test analysis was carried out with the following parameters: --assoc --allow-extra-chr  
234 --allow-no-sex. Finally, SNPs with Bonferroni corrected p-values less than 0.05 were taken as significant  
235 loci in the SNPs obtained from the two models above, and these loci were annotated. The annotated  
236 genes were subjected to GO enrichment analysis using the genomic genes of Lion-head goose as  
237 background.

### 238 **Selective-sweep analysis**

239 To analyze regions affected by long-term selection and are associated with domestication of geese, we  
240 calculated the Fixation indices ( $F_{ST}$ ) for four goose species using vcftools software with sliding windows  
241 length of 20 kb that had a 10-kb overlap between adjacent windows. The top 5% of regions were  
242 designated as candidate selective regions and the genes in these regions were considered as candidate  
243 genes.

## 244 **Results**

### 245 **Genome sequencing and assembly**

246 The Lion-head goose is a famous local variety in China and one of the most giant goose breeds  
247 worldwide, with a unique appearance and social benefits. Here, we attempt to construct a highly  
248 continuous chromosome-scale genome of an adult purebred male Lion-head goose with a high degree  
249 of homozygosity to minimize heterozygous alleles. The following sequencing and genome assemble  
250 strategies were applied: Illumina sequencing, Pacbio SMRT sequencing, BioNano optical mapping, and  
251 Hi-C approach (**Supplementary Table S1**). We assemble these data step by step and generate  
252 progressively improved assembled genome (**Supplementary Figure S1**). A total of 185.37 Gb of high-  
253 quality Pacbio long reads were generated, representing a  $\sim 168\times$  depth of the estimated 1.05 Gb genome  
254 with heterozygosity of 0.335% based on the k-mer analysis of the Illumina sequences (**Supplementary**  
255 **Figure S1, Supplementary Table S2**). Combing the *de novo* assembly of the Illumina and Pacbio

256 sequences resulted in a draft genome of 1.20 Gb, yielding 1,859 contigs with a length of 13.7 Mb for  
257 contig N50 and 57.6 Mb for the longest (**Table 1**). Furthermore, with the help of BioNano optical  
258 mapping, the scaffold N50 value was increased to 37 Mb. To obtain a chromosome-scale assembly, a  
259 set of ~230 Gb Hi-C data was used to orient, order, phase, and anchor the contigs. Approximately 97.27%  
260 of the reads assembled were anchored to 40 high-confidence pseudo-chromosomes (39 autosomes and  
261 Z chromosome) using the high-density genetic map (**Supplementary Figure S1, Fig. 2**). After polishing,  
262 we finally assembled the ultimate genome into 1.19 Gb with the final contig N50 of 20.59 Mb and  
263 scaffold N50 of 25.8 Mb, with a GC content of 42.39% (**Supplementary Table S2 and S3**). The  
264 structure and quality of the assembled genome were determined by mapping a Hi-C chromosomal  
265 contact map.

266 The completeness of the Lion-head goose genome assembly was assessed using the BUSCO gene set.  
267 The result showed that almost 99.02% of the reads were correctly mapped to the genome. We then  
268 evaluated the assembled genome with 95.21% single-copy and 1.70% duplicated orthologs from the  
269 BUSCO dataset, confirming that 8,081 genes (96.92%) were intact in this genome. These results indicate  
270 the high reliability and integrity of the assembled genome (**Supplementary Figure S2 and Table S4**).

## 271 **Genome annotation**

272 To support the genome annotation, we conducted RNA-Seq analysis using RNA samples of blood and  
273 eight tissues (brain, pharyngeal pouch, head sarcoma, spleen, liver, chest muscle, kidney, and heart)  
274 from four healthy adult individuals. The aggregate of 760 Gb raw reads was accumulated by the paired-  
275 end sequencing of the 36 constructed libraries. After filtering the adapter and low-quality sequences,  
276 723 Gb qualified Illumina reads remained, *de novo* assembled into unique transcripts (unigenes). Overall,  
277 a total of 216,229 unigenes were assembled and at the level N50, 5,082 nucleotides were obtained. Total  
278 21,208 protein-coding gene annotations were predicted in Lion-head goose by combining *de novo*  
279 prediction, homologous protein prediction, and transcription alignment. After filtering TE-related genes,  
280 a total of 21,010 protein-coding gene annotations were finally obtained by the TE seeker database (**Fig.**  
281 **2**). Furthermore, a total of 8.15% repeat sequence and 4.10% tandem repeats of the genome were



282 detected (**Table 1**). Comparative statistics of genome quality metrics with the assembled goose genome  
283 (including Zhedong white goose, Sichuan white goose and Tianfu goose) are shown in **Table 2**.

#### 284 **Phylogenetic analysis**

285 To investigate the genomic evolution of poultry, we compared the sequences of eight bird species (Lion-  
286 head goose, Zhedong white goose, duck, turkey, chicken, pigeon, saker, and titmouse) and green lizard,  
287 clustering the genes into 15,162 gene families (**Fig. 3A, Supplementary Table S5**). Among these, 6,422  
288 single-copy gene families were identified and used to construct a phylogenetic tree (**Fig. 3B**). This  
289 revealed that the geese and ducks were clustered into a subclade that probably evolved from a common  
290 ancestor approximately 28.42 million years ago (Mya). As expected, the Lion-head goose displayed a  
291 close relationship with the Zhedong white goose. The divergence time between the Lion-head goose and  
292 Zhedong white goose was estimated to be 13.79 Mya, and that between chicken and turkey was nearly  
293 25.07 Mya. The above results confirmed the reliability of the tree.

294 Of all the gene families in the Lion-head goose, 4,233 gene families were significantly expanded and  
295 324 were contracted. Compared with Zhedong white goose, the Lion-head goose had more gene families  
296 and there are also more events of gene family expansion and contraction. Moreover, we mixed the gene  
297 family sets of several *Anatidae* varieties (duck, Zhedong white goose, Lion-head goose), and performed  
298 expansion and contraction analysis and corresponding GO enrichment analysis. In this task, the GO  
299 analysis of expanded gene families suggested the olfactory perception, such as detection of chemical  
300 stimulus involved in sensory perception of smell (GO:0050911,  $p = 6.97 \times 10^{-8}$ ), and odorant-binding  
301 (GO:0005549,  $p = 1.47 \times 10^{-5}$ ), both of which may be related to the adaptation of the species to find food  
302 in water (**Fig. 4A, Supplementary Table S6**). Meanwhile, contracted gene families were concentrated  
303 in the areas of glucose synthesis and metabolism, such as hexokinase activity (GO:0004396,  $p =$   
304  $7.64 \times 10^{-26}$ ), glucose binding (GO:0005536,  $p = 2.30 \times 10^{-22}$ ), cellular glucose homeostasis (GO:0001678,  
305  $p = 6.84 \times 10^{-18}$ ), glycolytic process (GO:0006096,  $p = 1.75 \times 10^{-15}$ ), hexose metabolic process  
306 (GO:0019318,  $p = 2.66 \times 10^{-14}$ ), carbohydrate phosphorylation (GO:0046835,  $p = 1.68 \times 10^{-9}$ ), and glucose  
307 6-phosphate metabolic process (GO:0051156,  $p = 1.27 \times 10^{-9}$ ), which may be closely related to  
308 characteristics of glycogen storage and utilization during migration (**Fig. 4B, Supplementary Table**

309 **S7)**. Besides, 220 unique gene families (other species lack these gene families) of the Lion-head goose  
310 were identified and functionally annotated in GO categories, such as protein kinase activity  
311 (GO:0004672,  $p = 6.85 \times 10^{-9}$ ), the regulation of apoptotic process (GO:0042981,  $p = 5.78 \times 10^{-34}$ ), the  
312 adenylate cyclase-modulating G protein-coupled receptor signaling pathway (GO:0007188,  $p =$   
313  $5.92 \times 10^{-3}$ ), and fatty-acyl-CoA reductase (alcohol-forming) activity (GO:0080019,  $p = 8.94 \times 10^{-5}$ , **Fig.**  
314 **4C, Supplementary Table S8)**. Interestingly, we annotated a reproduction-related protein in the species-  
315 specific gene family, *Sterile* (Pfam ID: PF03015), acting on fatty-acyl-CoA reductase (alcohol-forming)  
316 activity, which may be related to the low reproductive rate caused by congenital infertility in geese.

317 Collinearity analysis allows one to judge molecular evolutionary events between species and explain  
318 the structural differences between the two genomes. We identified synteny blocks among avian genomes  
319 and found high collinearity between our assembly and the duck genome (genome size =1.19 Gb). Here,  
320 multiple chromosomes (Chr 1-5, 10, 12, 15, 17-20, 23, 26, 27, 29, 30, 32, 34, 36, 37, 39) of Lion-head  
321 goose were almost one-to-one collinear with those of the duck, but some chromosomal rearrangements  
322 occurred (**Fig. 3C, Supplementary Figure S3**). For example, on some chromosomes like Chr 1, 2, 3,  
323 and 4 of the duck genome, genes break and rearrange on the Lion-head goose genome, resulting in  
324 sequential inversion. In addition, some scaffolds such as Chr 9, 24, 25, 31, 35, 38 and 40, were not  
325 correlated with any chromosome of the duck genome maybe due to the different sources of genes on the  
326 chromosome. These results indicate that chromosome inversion and interchromosomal recombination  
327 may have occurred specifically in Lion-head goose during the evolutionary process, but this requires  
328 further investigation and verification. Moreover, Chr 4 of Lion-head goose was found to correspond to  
329 the sex chromosome Z of duck, except for the inversions of small patches of segments; therefore, we  
330 inferred that Chr 4 was the sex chromosome of the Lion-head goose. This information will be  
331 fundamental for comparative genomic studies in *Anatidae* animals.

### 332 **Cluster analysis of different goose species population**

333 Blood samples were collected from 514 geese (including Lion-head goose, Wuzong goose, Huangzong  
334 goose and Magang goose), and their weight was recorded, with the Lion-head goose using the minimum  
335 weight, the Wuzong goose using the maximum weight, and the Huangzong goose and Magang goose

336 using the average weight. That is, the Lion-head goose weighed at least 9 kg, the Wuzong goose weighed  
337 at most 2.5 kg, the Huangzong goose weighed about 3-4 kg, and the Magang goose weighed 4.8-5.5 kg  
338 (**Table 6**). Blood from each sample was used for paired-end 100 resequencing. And the average raw data  
339 was 1,520.60 Mb, the average sequencing depth was 12.05×, the average coverage was 7.56%, the  
340 average matching rate was 91.31%, and 44,858 SNP loci were retained for subsequent analysis after  
341 screening SNPs with minimum allele frequency <5%, Hardy-Weinberg equilibrium test significance  
342 threshold of  $10^{-7}$ , and maximum deletion rate threshold of 0.7. We reconstructed the goose population  
343 structure using SNP data, revealing four distinct subpopulations. The PCA results demonstrated that the  
344 Lion-head Goose population was clearly distinguishable from the Magang Goose, Wuzong Goose and  
345 Huangzong Goose, and there was a clear differentiation within the species (**Fig. 5A**). The clustering of  
346 Magang Goose and Huangzong Goose was closer together, probably related to their closer geographical  
347 location and the existence of some genetic exchange. The phylogenetic tree results were consistent with  
348 the PCA results. The clustering of Magang Goose and Huangzong Goose was closer to each other, and  
349 they clustered into one branch with Wuzong Goose (**Fig. 5B**).

### 350 **Candidate genomic regions for body weight based on combined analyses of GWAS and selective-** 351 **sweep**

352 The Lion-head Goose, Huangzong Goose, Magang Goose, and Wuzong Goose are all local species  
353 in Guangdong, but they differ greatly in body weight. In this study, we sought to reveal genomic changes  
354 associated with body weight in the four goose species and screen genomic regions and genes. Selective  
355 sweep analysis was performed based on the  $F_{ST}$  index, considering the top 5% window as candidate  
356 regions. And 979 selective regions containing 818 genes were detected.

357 We then combined the GWAS results with the detected selective features to screen for candidate  
358 genomic regions responsible for the differences in goose weight. From the Manhattan plot (**Fig. 5C**), a  
359 total of 10 significant signals were found to be associated with body weight trait in geese at the genome-  
360 wide level, including one significant SNP detected on Chr 2, 8, 9, and 33 respectively ( $-\log(p) > 7.30$ ),  
361 and six significant SNPs annotated by two genes on Chr 22, with the closest Manhattan plot SNP peak  
362 on Chr 9 for the gene *OR* (Olfactory receptor). Six significant SNPs on Chr 22 are located between

363 1,992,485 and 1,992,520 bp, a region that spans only a physical distance of 35 bp but contains six SNP  
364 loci, making it necessary to analyze these SNPs in this small region in detail to determine whether  
365 multiple QTL are involved. The most significant SNP in this region could explain about 8.19% of the  
366 phenotypic variation. Apart from significant SNPs, potentially significant QTLs were detected on many  
367 chromosomes (including Chr 2, 3, 6, 7, 10, 11, 15, 16, 20, 28, 30, 32, 36), with a total of 25 implied  
368 significant SNPs ( $4.90 < -\log(p) < 7.30$ ). On Chr 30, the suggestively significant SNPs were located  
369 between 1,258,517 and 2,422,666 bp, spanning approximately 1.16 Mb, with the most significant SNPs  
370 in this region explaining approximately 6.12% of the phenotypic variation (**Table 4**). In the present study,  
371 we identified genes in the region near the significant SNPs, annotating a total of 21 genes. These genes  
372 may be important in mediating growth and development, and we inference that the *LDLRAD4* gene may  
373 play a key role in developmental plasticity in geese, while the *GPR180* gene may regulate the locomotor  
374 behavior of geese to make them stronger (**Fig. 6**). GWAS peaks overlapped with genomic regions with  
375 selective features on some chromosomes (**Supplementary Data**). This suggests that the region carrying  
376 QTL are not only associated with body weight in GWAS, but are also under selection during  
377 domestication.

## 378 **Discussion**

379 Despite the importance of the genus *Anser*, an economically important animal, the relative scarcity of  
380 genomic resources has largely hindered progress in studying genome evolution and molecular breeding  
381 in the major animals. High-quality chromosome-level genomes can provide key resources for studying.  
382 This study describes a chromosome-scale assembly of Lion-head goose obtained by a combination of  
383 data from the Illumina, SMRT, BioNano, and Hi-C platforms. The genome assembly is 1.19 Gb in length,  
384 and more than 97.27% of the assembled genome is anchored on 40 pseudo-chromosomes. The BUSCO  
385 assessment revealed 99.02% complete genes in the assembled genome, making it a better-continuity and  
386 higher-quality genome assembly than the recently published Tianfu goose genome with a contig N50 of  
387 1.85 Mb and scaffold N50 of 33.12 Mb [39]. Compared with the cultivated breed Tianfu goose, Lion-  
388 head goose, a traditional native breed, should occupy a more prominent position in the germplasm

389 resources, and its evolving message can provide a reference for other local breeds which is worthy of  
390 in-depth study.

391 Comparative genomics is the analysis of the structural characteristics of multiple individual genomes  
392 of a species or genomes of multiple species to find out the similarities and differences of gene sequences  
393 of species with the help of bioinformatics, and then to study the gene family analysis, analyze the  
394 differentiation and evolution of species, to provide a basis for elucidating species evolution. In this study,  
395 the evolutionary events of the Lion-head goose were analyzed by comparing the genome sequences with  
396 those of other birds. The results showed that the Lion-head goose and Zhedong White goose were most  
397 closely related, diverging at about 13.8 Mya, while the geese and ducks diverged at 28.4 Mya. The  
398 results were similar to those of Zhedong White goose, Sichuan White goose and Tianfu goose, indicating  
399 the accuracy of the assembly result of this study. Comparative genomic analysis revealed the genetic  
400 basis of interesting characters, which helped elucidate important biological implications and obtain  
401 solutions for genomic evolution between Lion-head geese and other species of *Anatidae* family,  
402 facilitating future genetic breeding programs. This is the first chromosomal level reference genome of  
403 Lion-head goose, providing important genomic data for the study of the family *Anatidae*.

404 The genomic information of the species population was obtained by whole-genome resequencing,  
405 and a large amount of variation information was obtained by comparison with the reference genome.  
406 Based on the correlation between differences in variation information and phenotypic differences of  
407 individuals, the adaptation of species to the environment, scanning of variant loci associated with  
408 important traits at the genome level, and localization of genetic mutations were discussed. Lion head  
409 goose, Magang goose, Huangzong goose and Wuzong goose are the main breeds of geese in Guangdong  
410 Province. Although they all belong to Guangdong Province, the body weight of adult geese varies greatly,  
411 and the molecular mechanism causing the huge difference is still unclear. In this study, four goose  
412 species were resequenced and examined for variation. Principal component analysis and phylogenetic  
413 tree analysis revealed significant differences among several goose species, indicating the feasibility of  
414 this study. Subsequently, GWAS was used to identify the candidate functional SNPs that might cause  
415 the weight difference of the four goose species, and the genes such as LDLRAD4, GPR180, and OR

416 were analyzed and annotated, attributed to play an important role in mediating growth and development.  
417 Recently, there have been several studies related to agricultural traits that have achieved success in  
418 animal GWAS projects, for example, GWAS for improving reproductive performance and egg quality  
419 in geese and *TMEM161A* gene for embryo development [40]. Genome-wide association analysis of the  
420 early-lactation milk fat content in 3,513 Fleckvieh bulls and 2327 Holstein bulls detected 6 associated  
421 QTL regions, two of which were located near the gene *DGAT1* [41]. GWAS was conducted on 225  
422 ducks with different-sized black spots, and the results showed that *EDNRB2* was the gene  
423 responsible for the variation in duck body surface spot size [42]. In this study, *LDLRAD4* (low-  
424 density lipoprotein receptor class A domain containing 4), *OR* (Olfactory receptor), and  
425 *GPR180* (G protein-coupled receptor 180) were mainly found to function in body weight traits.  
426 Knockdown of *LDLRAD4* enhances transforming growth factor (TGF)- $\beta$ -induced cell migration, which  
427 in turn regulates cell growth, differentiation, motility, apoptosis and matrix protein production [43]. The  
428 olfactory receptor (*OR2AT4*) has been shown to stimulate the proliferation of keratin-forming cells in  
429 peripheral human tissues [44]. *GPR180*, a component of the TGF- $\beta$  signaling pathway, also has  
430 metabolic relevance in the body and may play an essential role in regulating adipose tissue and systemic  
431 energy metabolism [45]. Here we found some correlation between these genes and the TGF- $\beta$  signaling,  
432 presumably this pathway also acts on body weight. Identifying of molecular genetic markers and the  
433 main effect QTL associated with critical agricultural traits is of great interest to breeders. Nevertheless,  
434 the candidate genes identified in this study were only detected by sequencing data and not  
435 experimentally validated. The functions of these candidate SNPs and gene markers need to be further  
436 verified by experimental results or other techniques. Thus, the findings in our GWAS study represent a  
437 valuable resource for geese and provide a new opportunity and basis for geneticists and breeders to work  
438 together to explore the genetics behind various agricultural traits.

### 439 **Conclusions**

440 In summary, we have obtained a high-quality chromosome-scale draft assembly of a purebred Lion-  
441 head goose, which provides a genetic basis for understanding the acquisition of related traits and

442 facilitates advances in goose genomics and genetic improvement. Moreover, the candidate genes and  
443 their variants identified in this study will help clarify our understanding of goose selective breeding and  
444 the development of new breeds. The obtained genome sequence of Lion-head goose is a vital addition  
445 to the genome of genus *Anser* and is valuable for further understanding goose molecular breeding  
446 strategies. This genomic resource is also of high value for evolutionary studies of closely related species.

#### 447 **Data Availability**

448 The final genome assembly data supporting the results of this article is available in the NCBI BioProject  
449 repository, [Accession number: PRJNA736831]. The RNA assembly data is available in the NCBI  
450 BioProject repository, [Accession number: PRJNA807796]. The raw re-sequencing genome data  
451 supporting of the GWAS study is available in the NCBI BioProject repository [Accession number:  
452 PRJNA552198, PRJNA552383, and PRJNA552384]. All supporting data are available in  
453 the *GigaScience* GigaDB database [46].

#### 454 **Additional Files**

455 Supplementary Figure S1. Sequencing process and presentation.

456 Supplementary Figure S2. BUSCO assessment of the assembly genome of Lion-head goose.

457 Supplementary Figure S3. Gene synteny between the Lion-head goose and duck genomes.

458 Supplementary Table S1. Statistics of sequenced clean data.

459 Supplementary Table S2. Statistics of genome survey.

460 Supplementary Table S3. Statistics of genome assembly quality.

461 Supplementary Table S4. Summary of BUSCOs genome evaluation.

462 Supplementary Table S5: Summary of gene families from several species.

463 Supplementary Table S6. GO annotation of expanded gene families from Anatidae varieties (Duck,  
464 Zhedong white goose, Lion-head goose; Top 20).

465 Supplementary Table S7. GO annotation of contraction gene families from Anatidae varieties (Duck,  
466 Zhedong white goose, Lion-head goose; Top 20).

467 Supplementary Table S8. GO annotation of unique gene families from the Lion-head goose.

468 Supplementary Data. Significant information of selective-sweep analysis.

## 469 **Abbreviations**

470 BLAST: Basic Local Alignment Search Tool; BWA: Burrows-Wheeler Aligner; BUSCO:  
471 Benchmarking Universal Single-Copy Orthologs; Chr: chromosome; GATK4: Genome Analysis Toolkit  
472 4; Gb: gigabase pairs; GO: gene ontology; GPR180: G protein-coupled receptor 180; GWAS: genome-  
473 wide association study; HERA: Highly Efficient Repeat Assembly; Hi-C: high-throughput chromosome  
474 conformation capture; Kb: kilobase pairs; kg: kilogram; LDLRAD4: low-density lipoprotein receptor  
475 class A domain containing 4; LTR: long terminal repeat; Mb: megabase pairs; Mya: million years ago;  
476 NCBI: National Center for Biotechnology Information; OR: Olfactory receptor; OR2AT4: olfactory  
477 receptor family 2 subfamily AT member 4; PacBio: Pacific Biosciences; PCA: Principal component  
478 analysis; QTL: quantitative trait locus; RAxML: Randomized Axelerated Maximum Likelihood; RNA-  
479 seq: RNA sequencing; SMRT: single molecule real-time; SNP: single-nucleotide polymorphism; STAR:  
480 Spliced Transcripts Alignment to a Reference; TE: transposable element; TGF: transforming growth  
481 factor; TMEM161A: Transmembrane protein 161A.

## 482 **Competing Interests**

483 The authors declare that they have no conflict of interest.

## 484 **Funding**

485 This work was supported by the Key Research and Development Program of Guangdong Province  
486 (2020B020222001), the Construction of Modern Agricultural Science and Technology Innovation  
487 Alliance in Guangdong Province (2021KJ128, 2020KJ128), the National Modern Agricultural Industry  
488 Science and Technology Innovation Center in Guangzhou (2018kczx01), the Guangdong Provincial  
489 Promotion Project on Preservation and Utilization of Local Breed of Livestock and Poultry (4000-  
490 F18260), the Guangdong Basic and Applied Basic Research Foundation (2019A1515012006), the  
491 Science and Technology Program of Guangdong province, China (2020B1212060060), the China  
492 Agriculture Research System of MOF and MARA (CARS-42-13), the Special Project of National  
493 Modern Agricultural Industrial Technology System (CARS-41) and Provincial Science and Technology



494 Special Fund Project for Zhongshan City (major special project + Task list management mode)  
495 (2021sdr003). The authors would like to thank the BGI in Shenzhen for their work on genome  
496 sequencing. We also thank the staff of Minglead Gene for providing the technical and computing support  
497 during the research.

## 498 **Author's Contributions**

499 Q.X., Z.L., and X.Z. conceived and designed the research. X.Z., J.C., and Q.Z. coordinated the project.  
500 J.C. and Z.L. provided animal samples. Q.Z. and Z. X. collected and prepared the samples. Q.Z.  
501 performed sequencing, assembly and bioinformatics analysis. W.L., and F.C. led work identifying  
502 genes, and H.L., W.C. aided with many aspects of gene identification and did the GO analyses. Q.Z.,  
503 X.Z. wrote and revised the manuscript and the supplementary information. J.W., M.J., Z.H., H.Z.,  
504 Z.L., and Q.X. participated in discussions and provided valuable advice. All authors read and approved  
505 the manuscript.

## 506 **References**

- 507 1. Hoyo JD, Elliott A, Sargatal J, et al. Handbook of the birds of the world. Barcelona: Lynx Edicions; 1992.
- 508 2. Madsen J, Marcussen LK, Knudsen N, et al. Does intensive goose grazing affect breeding waders? *Ecol Evol*  
509 2019;**9**(24):14512-14522. doi:10.1002/ece3.5923.
- 510 3. Wang Y, Li SM, Huang J, et al. Mutations of TYR and MITF Genes are Associated with Plumage Colour  
511 Phenotypes in Geese. *Asian-Australas J Anim Sci* 2014;**27**(6):778-83. doi:10.5713/ajas.2013.13350.
- 512 4. Gao G, Zhao X, Li Q, et al. Genome and metagenome analyses reveal adaptive evolution of the host and  
513 interaction with the gut microbiota in the goose. *Sci Rep* 2016;**6**:32961. doi:10.1038/srep32961.
- 514 5. Yao Y, Yang YZ, Gu TT, et al. Comparison of the broody behavior characteristics of different breeds of geese.  
515 *Poult Sci* 2019;**98**(11):5226-5233. doi:10.3382/ps/pez366.
- 516 6. Lu L, Chen Y, Wang Z, et al. The goose genome sequence leads to insights into the evolution of waterfowl  
517 and susceptibility to fatty liver. *Genome Biol* 2015;**16**:89. doi:10.1186/s13059-015-0652-y.
- 518 7. Li HF, Zhu WQ, Chen KW, et al. Two maternal origins of Chinese domestic goose. *Poult Sci*  
519 2011;**90**(12):2705-10. doi:10.3382/ps.2011-01425.
- 520 8. Tang J, Shen X, Ouyang H, et al. Transcriptome analysis of pituitary gland revealed candidate genes and gene  
521 networks regulating the growth and development in goose. *Anim Biotechnol* 2020:1-11.  
522 doi:10.1080/10495398.2020.1801457.
- 523 9. Zhang X, Wang J, Li X, et al. Transcriptomic investigation of embryonic pectoral muscle reveals increased  
524 myogenic processes in Shitou geese compared to Wuzong geese. *Br Poult Sci* 2021;**62**(5):650-657.  
525 doi:10.1080/00071668.2021.1912292.
- 526 10. Ardui S, Ameer A, Vermeesch JR, et al. Single molecule real-time (SMRT) sequencing comes of age:  
527 applications and utilities for medical diagnostics. *Nucleic Acids Res* 2018;**46**(5):2159-2168.  
528 doi:10.1093/nar/gky066.
- 529 11. Yoshinaga Y, Daum C, He G, et al. Genome Sequencing. *Methods Mol Biol* 2018;**1775**:37-52.  
530 doi:10.1007/978-1-4939-7804-5\_4.
- 531 12. Kong S, Zhang Y. Deciphering Hi-C: from 3D genome to function. *Cell Biol Toxicol* 2019;**35**(1):15-32.  
532 doi:10.1007/s10565-018-09456-2.
- 533 13. Nakano K, Shiroma A, Shimoji M, et al. Advantages of genome sequencing by long-read sequencer using  
534 SMRT technology in medical area. *Hum Cell* 2017;**30**(3):149-161. doi:10.1007/s13577-017-0168-8.
- 535 14. Jain M, Olsen HE, Turner DJ, et al. Linear assembly of a human centromere on the Y chromosome. *Nat*  
536 *Biotechnol* 2018;**36**(4):321-323. doi:10.1038/nbt.4109.
- 537 15. Sun L, Gao T, Wang F, et al. Chromosome-level genome assembly of a cyprinid fish *Onychostoma macrolepis*  
538 by integration of nanopore sequencing, Bionano and Hi-C technology. *Mol Ecol Resour* 2020;**20**(5):1361-  
539 1371. doi:10.1111/1755-0998.13190.
- 540 16. Bocklandt S, Hastie A, Cao H. Bionano Genome Mapping: High-Throughput, Ultra-Long Molecule Genome  
541 Analysis System for Precision Genome Assembly and Haploid-Resolved Structural Variation Discovery. *Adv*  
542 *Exp Med Biol* 2019;**1129**:97-118. doi:10.1007/978-981-13-6037-4\_7.

- 543 17. Koren S, Walenz BP, Berlin K, et al. Canu: scalable and accurate long-read assembly via adaptive k-mer  
544 weighting and repeat separation. *Genome Res* 2017;**27**(5):722-736. doi:10.1101/gr.215087.116.
- 545 18. Du H, Liang C. Assembly of chromosome-scale contigs by efficiently resolving repetitive sequences with long  
546 reads. *Nat Commun* 2019;**10**(1):5360. doi:10.1038/s41467-019-13355-3.
- 547 19. Li H, Durbin R. Fast and accurate short read alignment with Burrows-Wheeler transform. *Bioinformatics*  
548 2009;**25**(14):1754-60. doi:10.1093/bioinformatics/btp324.
- 549 20. Danecek P, Bonfield JK, Liddle J. et al. Twelve years of SAMtools and BCFtools. *Gigascience*.  
550 2021;**10**(2):giab008. doi: 10.1093/gigascience/giab008.
- 551 21. Walker BJ, Abeel T, Shea T, et al. Pilon: an integrated tool for comprehensive microbial variant detection and  
552 genome assembly improvement. *Plos One* 2014;**9**(11):e112963. doi:10.1371/journal.pone.0112963.
- 553 22. Durand NC, Shamim MS, Machol I, et al. Juicer Provides a One-Click System for Analyzing Loop-Resolution  
554 Hi-C Experiments. *Cell Syst* 2016;**3**(1):95-8. doi:10.1016/j.cels.2016.07.002.
- 555 23. Dudchenko O, Batra SS, Omer AD, et al. De novo assembly of the *Aedes aegypti* genome using Hi-C yields  
556 chromosome-length scaffolds. *Science* 2017;**356**(6333):92-95. doi:10.1126/science.aal3327.
- 557 24. Servant N, Varoquaux N, Lajoie BR, et al. HiC-Pro: an optimized and flexible pipeline for Hi-C data processing.  
558 *Genome Biol* 2015;**16**(1). doi:10.1186/s13059-015-0831-x.
- 559 25. Bolger AM, Lohse M, Usadel B. Trimmomatic: a flexible trimmer for Illumina sequence data. *Bioinformatics*  
560 2014;**30**(15):2114-20. doi:10.1093/bioinformatics/btu170.
- 561 26. Grabherr MG, Haas BJ, Yassour M, et al. Full-length transcriptome assembly from RNA-Seq data without a  
562 reference genome. *Nat Biotechnol* 2011;**29**(7):644-52. doi:10.1038/nbt.1883.
- 563 27. Huang Y, Niu B, Gao Y, et al. CD-HIT Suite: a web server for clustering and comparing biological sequences.  
564 *Bioinformatics* 2010;**26**(5):680-2. doi:10.1093/bioinformatics/btq003.
- 565 28. Dobin A, Davis CA, Schlesinger F, et al. STAR: ultrafast universal RNA-seq aligner. *Bioinformatics*  
566 2013;**29**(1):15-21. doi:10.1093/bioinformatics/bts635.
- 567 29. Seppely M, Manni M, Zdobnov EM. BUSCO: Assessing Genome Assembly and Annotation Completeness.  
568 *Methods Mol Biol* 2019;**1962**:227-245. doi:10.1007/978-1-4939-9173-0\_14.
- 569 30. Manni M, Berkeley MR, Seppely M, et al. BUSCO: Assessing Genomic Data Quality and Beyond. *Curr Protoc*  
570 2021;**1**(12):e323. doi:10.1002/cpz1.323.
- 571 31. Lu L, Chen Y, Wang Z, et al. The goose genome sequence leads to insights into the evolution of waterfowl  
572 and susceptibility to fatty liver. *Genome Biol* 2015;**16**:89. doi:10.1186/s13059-015-0652-y.
- 573 32. Benson G. Tandem repeats finder: a program to analyze DNA sequences. *Nucleic Acids Res* 1999;**27**(2):573-  
574 80. doi:10.1093/nar/27.2.573.
- 575 33. Wang Y, Tang H, Debarry JD, et al. MCLScanX: a toolkit for detection and evolutionary analysis of gene  
576 synteny and collinearity. *Nucleic Acids Res* 2012;**40**(7):e49. doi:10.1093/nar/gkr1293.
- 577 34. Stamatakis A. RAxML version 8: a tool for phylogenetic analysis and post-analysis of large phylogenies.  
578 *Bioinformatics* 2014;**30**(9):1312-3. doi:10.1093/bioinformatics/btu033.
- 579 35. Sanderson MJ. r8s: inferring absolute rates of molecular evolution and divergence times in the absence of a  
580 molecular clock. *Bioinformatics* 2003;**19**(2):301-2. doi:10.1093/bioinformatics/19.2.301.
- 581 36. Han MV, Thomas GW, Lugo-Martinez J, et al. Estimating gene gain and loss rates in the presence of error in  
582 genome assembly and annotation using CAFE 3. *Mol Biol Evol* 2013;**30**(8):1987-97.  
583 doi:10.1093/molbev/mst100.
- 584 37. Yu G, Wang LG, Han Y, et al. clusterProfiler: an R package for comparing biological themes among gene  
585 clusters. *Omics* 2012;**16**(5):284-7. doi:10.1089/omi.2011.0118.
- 586 38. Purcell S, Neale B, Todd-Brown K, et al. PLINK: a tool set for whole-genome association and population-  
587 based linkage analyses. *Am J Hum Genet* 2007;**81**(3):559-75. doi:10.1086/519795.
- 588 39. Li Y, Gao G, Lin Y, et al. Pacific Biosciences assembly with Hi-C mapping generates an improved,  
589 chromosome-level goose genome. *Gigascience* 2020;**9**(10). doi:10.1093/gigascience/giaa114.
- 590 40. Gao G, Gao D, Zhao X, et al. Genome-Wide Association Study-Based Identification of SNPs and Haplotypes  
591 Associated With Goose Reproductive Performance and Egg Quality. *Front Genet* 2021;**12**:602583.  
592 doi:10.3389/fgene.2021.602583.
- 593 41. Daetwyler HD, Capitan A, Pausch H, et al. Whole-genome sequencing of 234 bulls facilitates mapping of  
594 monogenic and complex traits in cattle. *Nat Genet* 2014;**46**(8):858-65. doi:10.1038/ng.3034.
- 595 42. Xi Y, Xu Q, Huang Q, et al. Genome-wide association analysis reveals that EDNRB2 causes a dose-dependent  
596 loss of pigmentation in ducks. *Bmc Genomics* 2021;**22**(1):381. doi:10.1186/s12864-021-07719-7.
- 597 43. Nakano N, Maeyama K, Sakata N, et al. C18 ORF1, a novel negative regulator of transforming growth factor-  
598 beta signaling. *J Biol Chem* 2014;**289**(18):12680-92. doi:10.1074/jbc.M114.558981.
- 599 44. Cheret J, Bertolini M, Ponce L, et al. Olfactory receptor OR2AT4 regulates human hair growth. *Nat Commun*  
600 2018;**9**(1):3624. doi:10.1038/s41467-018-05973-0.

- 601 45. Balazova L, Balaz M, Horvath C, et al. GPR180 is a component of TGFbeta signalling that promotes  
602 thermogenic adipocyte function and mediates the metabolic effects of the adipocyte-secreted factor CTHRC1.  
603 Nat Commun 2021;**12**(1):7144. doi:10.1038/s41467-021-27442-x.
- 604 46. Zhao Q, Chen J, Xie Z, et al. Supporting data for "Chromosome-level genome assembly of goose provides  
605 insight into the adaptation and growth of local goose breeds" GigaScience Database. 2023.  
606 <http://dx.doi.org/10.5524/102339>.  
607

608 **Figure legends**

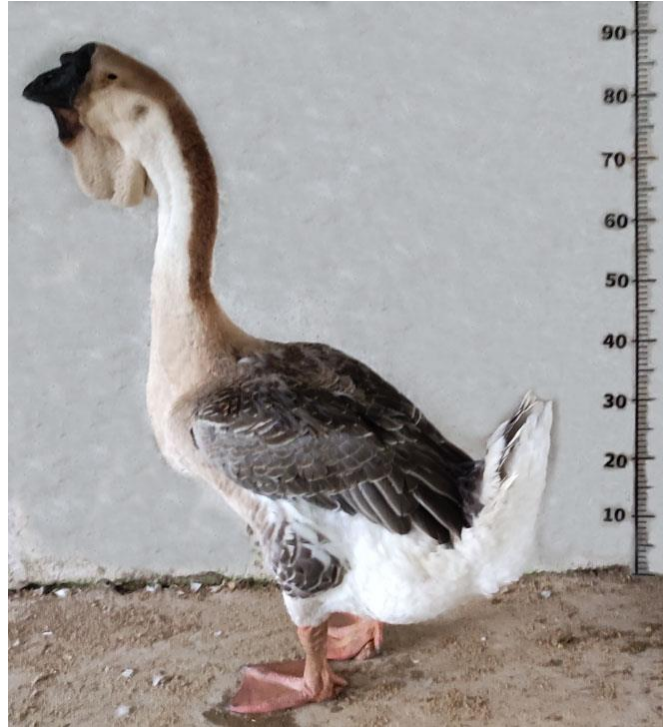

609

610 **Figure 1. A picture of a male adult Lion-head goose.**

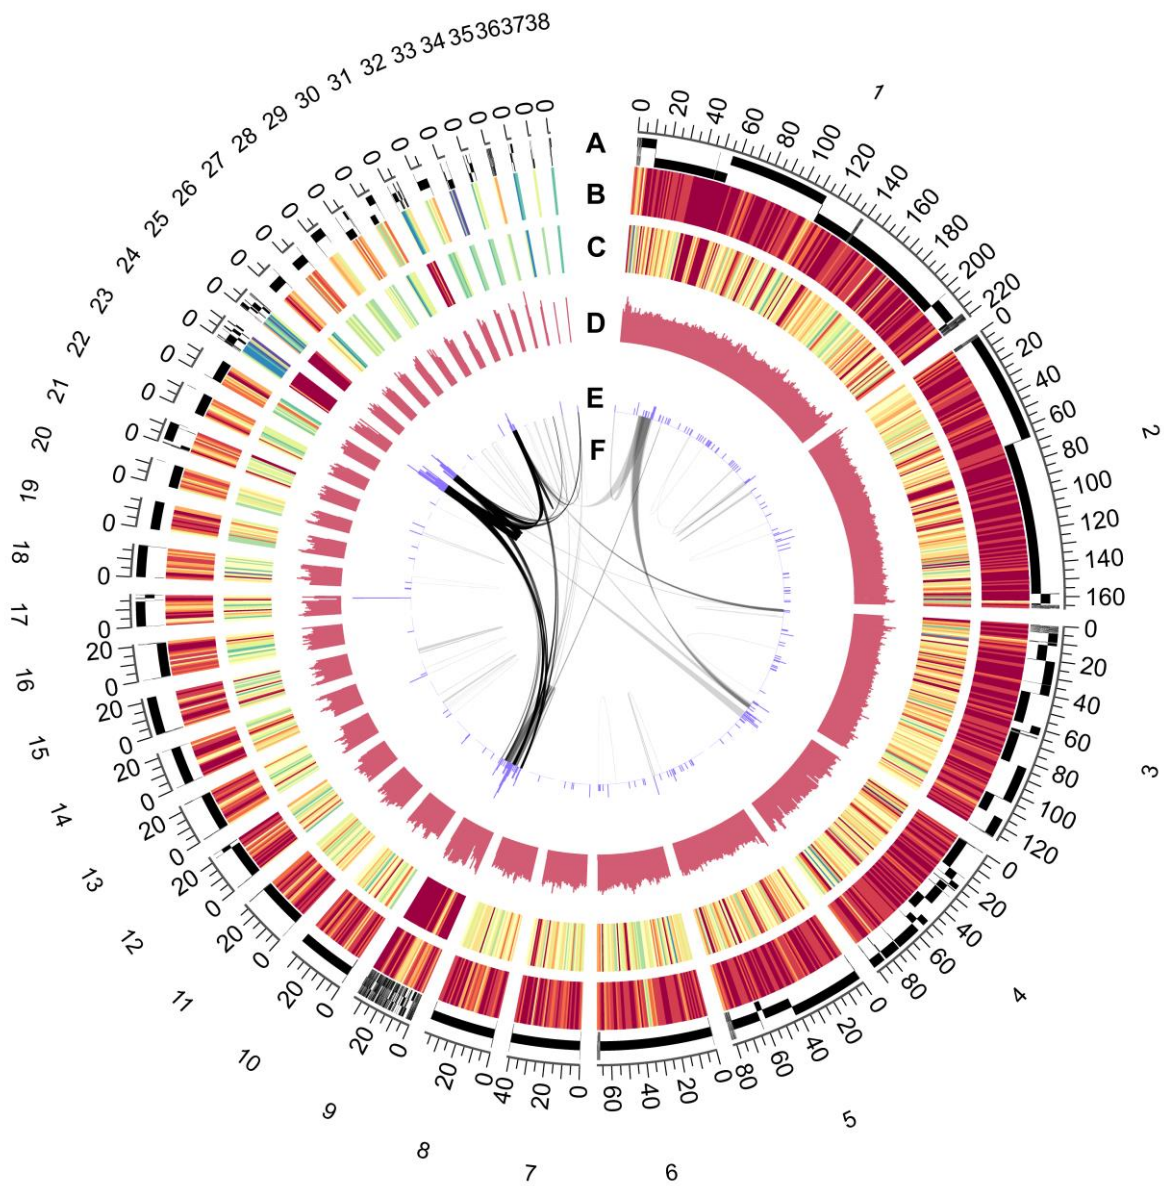

612

613 **Figure 2. Distribution of genomic features.** Concentric circle diagram presents the distribution of  
 614 genomic features of Lion-head goose using nonoverlapping sliding windows with sizes of 1 Mb (from  
 615 outmost to innermost). (A) the assembled pseudo-chromosome and the corresponding position; (B) gene  
 616 density calculated on the basis of the number of genes; (C) average expression level of overall 36  
 617 samples. eight tissues (i.e., brain, pharyngeal pouch, head sarcoma, spleen, liver, chest muscle, kidney  
 618 and heart) and blood collected from four healthy adult animals; (D) GC content; (E) density of TE; (F)  
 619 gene synteny and collinearity analysis.

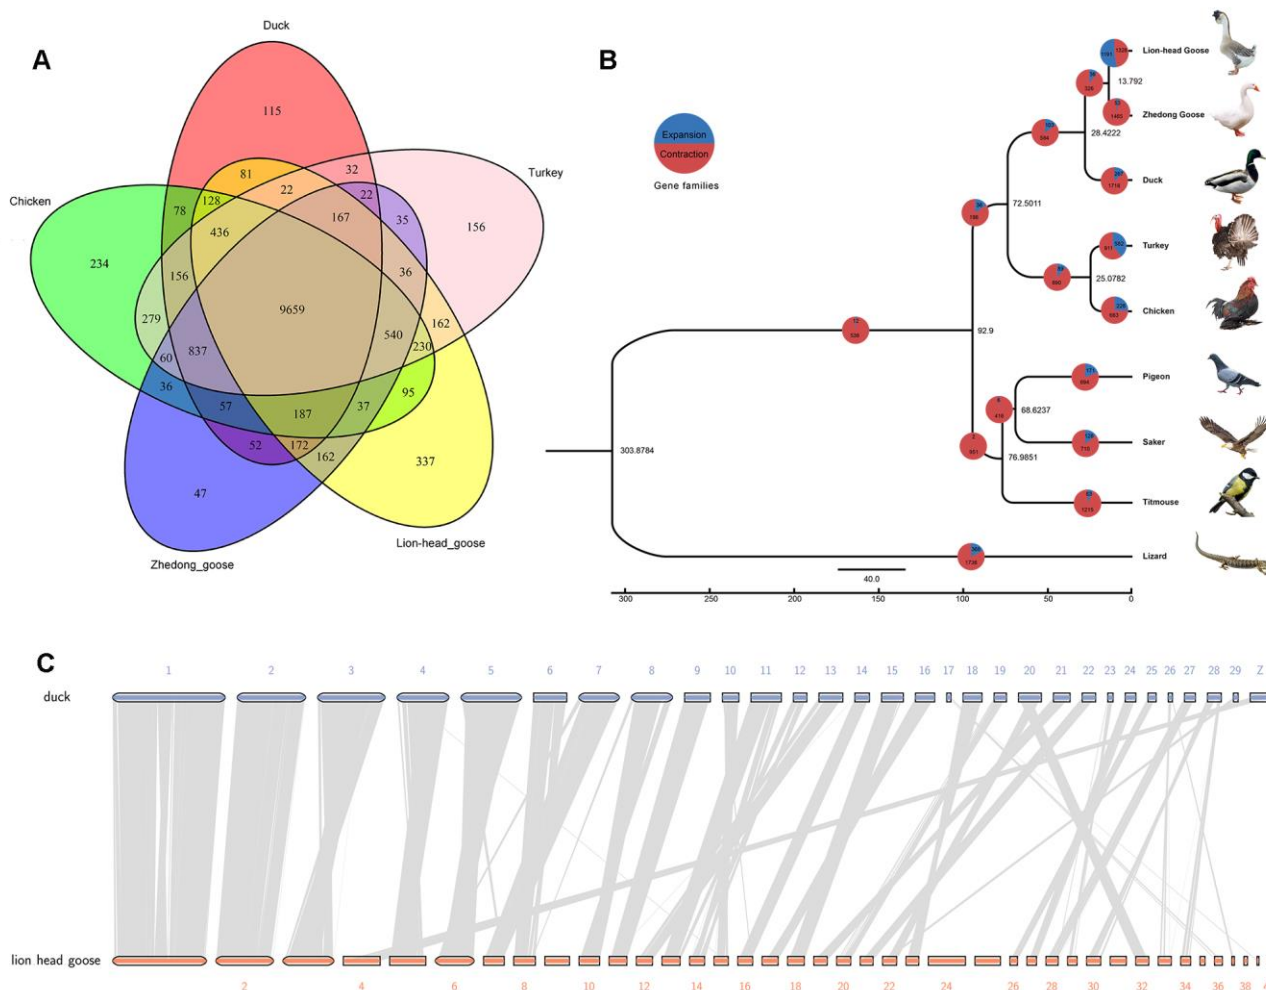

620

621 **Figure 3. Phylogenetic relationship and comparative genomics analyses.** (A) Venn diagram showing  
 622 the orthologous gene families shared among the genomes of Lion-head goose, Zhedong white goose,  
 623 chicken, duck, and turkey. (B) Phylogenetic tree with the divergence times and history of orthologous  
 624 gene families. Numbers on the nodes represent divergence times. The numbers of gene families that  
 625 expanded (green) or contracted (red) in each lineage after speciation are shown on the circles of the  
 626 corresponding branch. (C) Gene comparison of homologous chromosomes between Lion-head goose  
 627 and duck. Gray lines indicate collinearity between the genomes.

A

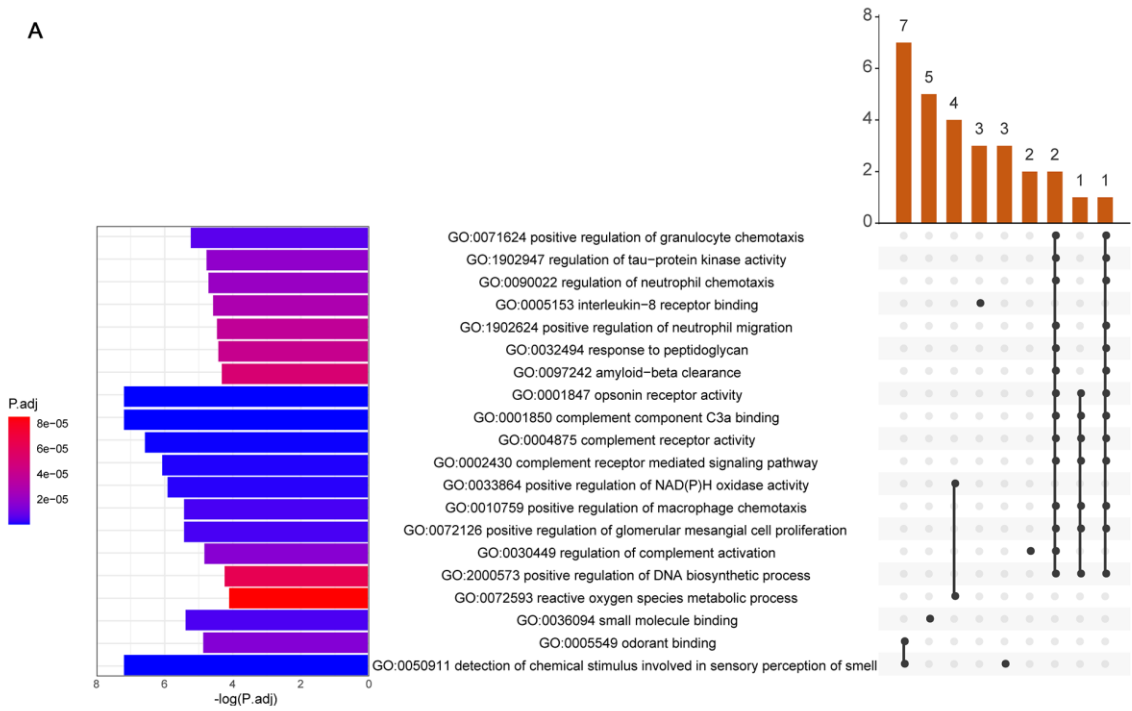

B

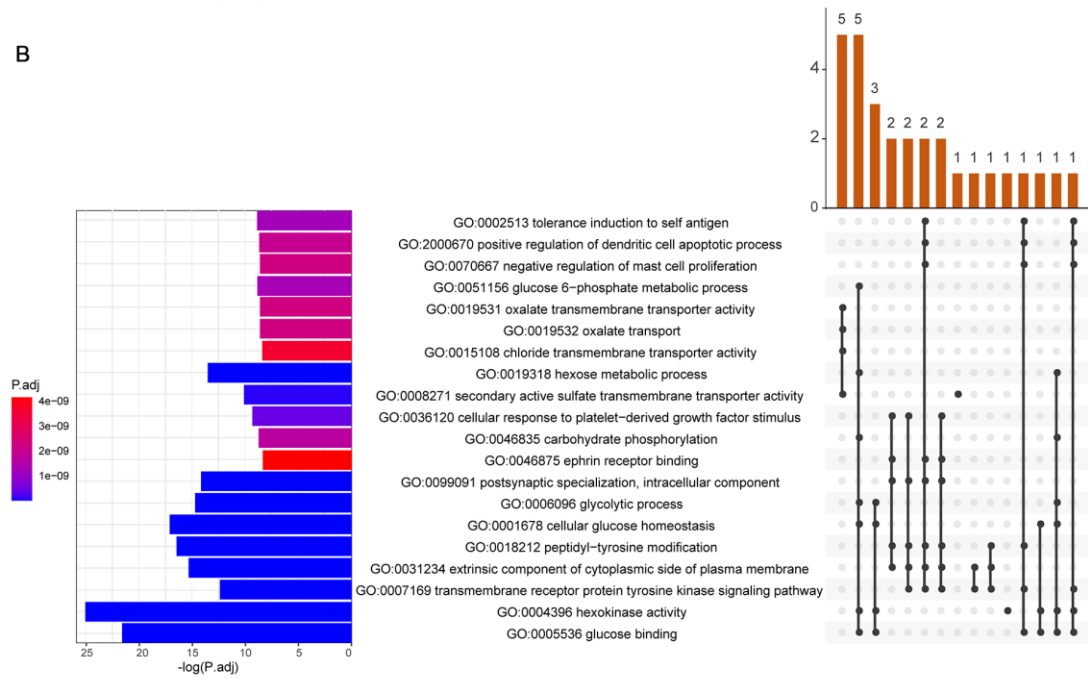

C

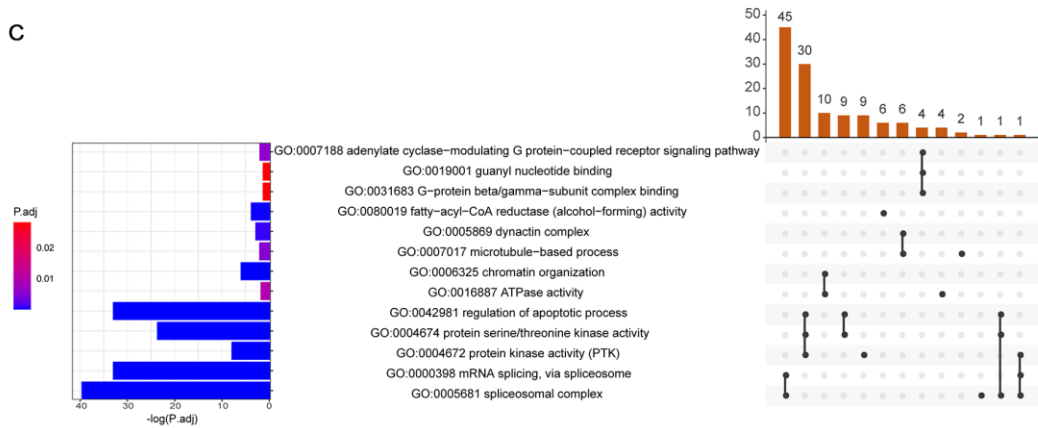

629 **Figure 4. GO enrichment analysis of gene families.** (A) Expanded and (B) contracted gene families  
630 from Anatidae varieties (duck, Zhedong white goose, Lion-head goose). (C) Unique gene families from  
631 the Lion-head goose. The bar graph on the left represents the P-adjust gradient of GO terms, and the  
632 color corresponds to the number on the x-axis (i.e.  $-\log(P.\text{adj})$ ). The bluer the color is, the smaller the  
633 P-adjust is, and the more significant it is. The redder the color is, the larger the P-adjust is, and the less  
634 significant it is. The upper right bar chart exhibits that several genes act together on the terms below.  
635 The lower right chart displays the intersection of the genes of each term; the dots connected by lines  
636 represent the intersection of multiple terms; the black dots represent “yes”, and the gray dots represent  
637 “no”.



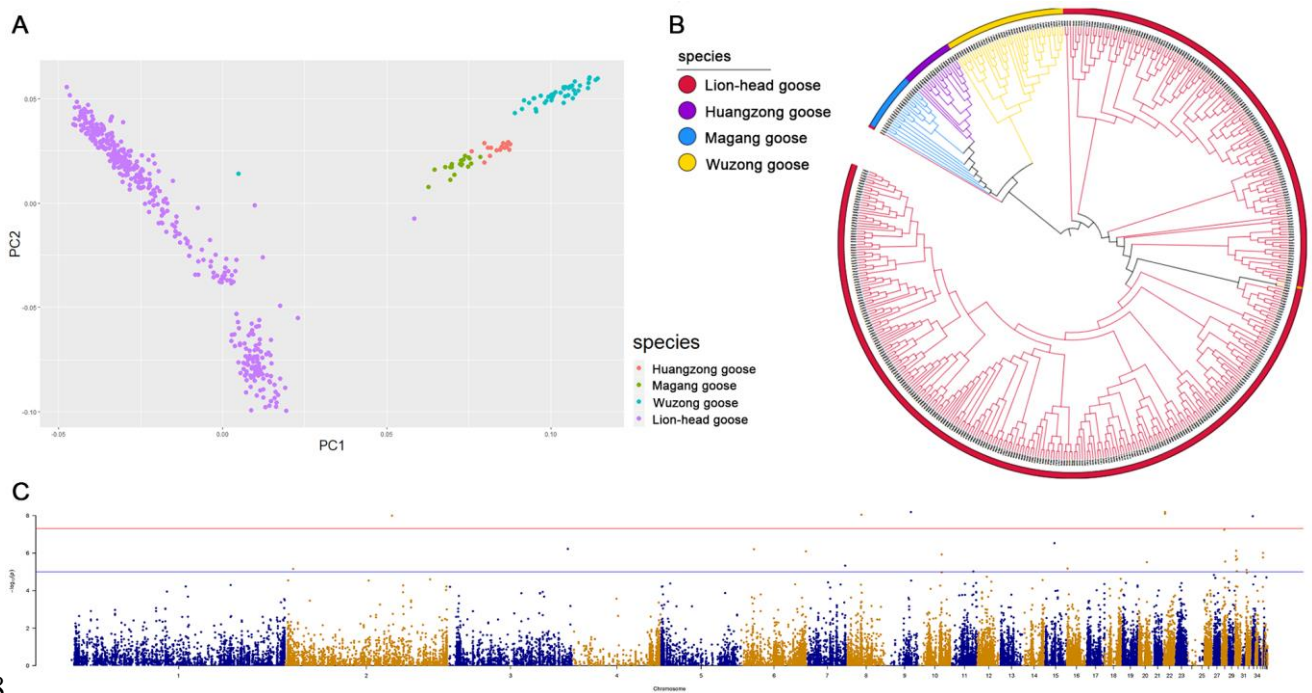

638

639 **Figure 5. Comparison of different goose species and genome-wide association analysis of body**

640 **weight.** (A) Principal component analysis of sample structures using first two principal components. (B)

641 The phylogenetic trees of several goose species. (C) Manhattan plot of genome-wide association

642 analysis for body weight. The X-axis indicates chromosomes, and Y-axis indicates the P values of the

643 SNP markers. The red solid line indicates the threshold P value for genome-wide significance. The blue

644 solid line indicates the threshold P value for the significance of potential association.

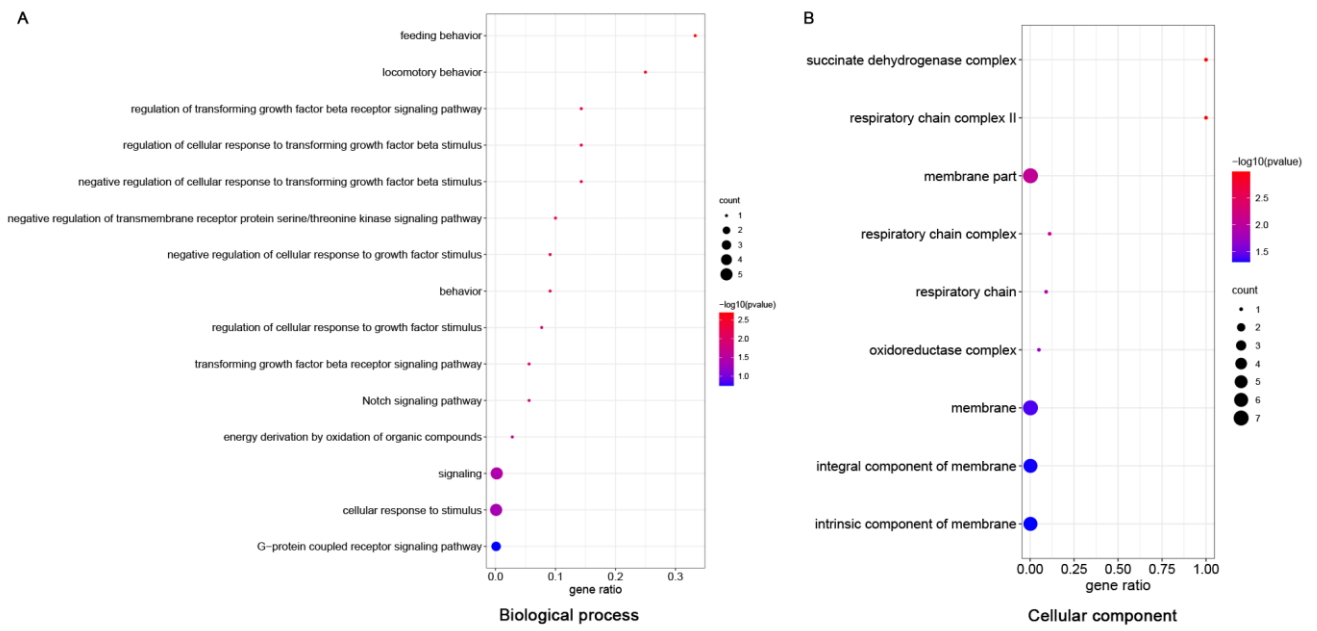

645

646 **Figure 6. GO analysis of body weight-related genes:(A) Biological processes level, (B) Cellular**

647 **component level.**

**Table 1:** Summary of repeat classification.

| Type                              | Length      | Percent |
|-----------------------------------|-------------|---------|
| Long interspersed nuclear element | 76,437,757  | 5.98    |
| Simple sequence repeats           | 23,026,311  | 1.80    |
| Low complexity                    | 4,663,288   | 0.36    |
| Tandem repeats                    | 52,426,380  | 4.10    |
| Total                             | 156,553,736 | 12.25   |

648

**Table 2:** Comparison of the present study with previous quality metrics of goose genome assembly.

| Genomic features                      | Lion-head goose | Zhedong white goose | Sichuan white goose | Tianfu goose  |
|---------------------------------------|-----------------|---------------------|---------------------|---------------|
| Estimate of genome size (bp)          | 1,278,045,811   | 1,208,661,181       | 1,198,802,839       | 1,277,099,016 |
| Total length of contigs (bp)          | 1,268,074,106   | 1,086,838,604       | 1,100,859,441       | 1,113,842,245 |
| Total length of scaffolds (bp)        | 1,277,289,474   | 1,122,178,121       | 1,130,663,797       | 1,113,913,845 |
| Number of contigs                     | 1,318           | 60,979              | 53,336              | 2,771         |
| Number of scaffolds                   | 1,266           | 1,050               | 1,837               | 2,055         |
| Contig N50 (bp)                       | 21,589,146      | 27,602              | 35,032              | 1,849,874     |
| Scaffold N50 (bp)                     | 27,064,542      | 5,202,740           | 5,103,766           | 33,116,532    |
| Longest contig (bp)                   | 91,420,268      | 201,281             | 399,111             | 10,766,871    |
| Longest scaffold (bp)                 | 98,160,899      | 24,051,356          | 20,207,557          | 70,896,740    |
| GC content                            | 42.39%          | 38.00%              | 41.68%              | 42.15%        |
| No. of predicted protein-coding genes | 21,010          | 16,150              | 16,288              | 17,568        |
| Percentage of repeat sequences        | 12.25%          | 6.33%               | 6.90%               | 8.67%         |

649

**Table 3:** Descriptive statistical of body weight traits.

| Species         | Number | Max (Kg) | Min (Kg) | Mean±SEM   |
|-----------------|--------|----------|----------|------------|
| Lion-head goose | 416    | 15.70    | 9.00     | 13.55±1.97 |
| Magang goose    | 20     | 5.50     | 4.80     | 5.32±0.36  |
| Huangzong goose | 20     | 4.30     | 2.70     | 3.40±0.83  |
| Wuzong goose    | 44     | 2.50     | 1.80     | 2.24±0.25  |

650

**Table 4:** Genome-wide association analysis of body weight in geese.

| Chr | Allele | Physical position | Regression coefficient | P value  | Genes      |
|-----|--------|-------------------|------------------------|----------|------------|
| 2   | A      | 108496954         | -0.1886                | 1.01E-08 | LDLRAD4    |
| 2   | G      | 7706165           | 0.2612                 | 6.98E-06 | LDLRAD4    |
| 3   | T      | 123032780         | -0.3979                | 6.03E-07 | EGF, KBTBD |
| 6   | A      | 13264157          | -0.24                  | 6.28E-07 | TSPAN      |
| 6   | T      | 66027192          | 0.2127                 | 8.14E-07 | IGFN1      |
| 7   | T      | 39117443          | -0.3131                | 4.66E-06 | —          |
| 8   | T      | 14712470          | 0.1865                 | 8.97E-09 | PPEF1      |
| 9   | T      | 26883582          | -2.7E+12               | 0        | OR         |
| 10  | C      | 23997415          | -0.3032                | 1.19E-06 | —          |
| 10  | C      | 23997399          | -0.2542                | 1.05E-05 | —          |

|    |   |          |         |          |                |
|----|---|----------|---------|----------|----------------|
| 10 | T | 23997401 | -0.2542 | 1.05E-05 | —              |
| 11 | A | 22838749 | 0.1548  | 9.55E-06 | —              |
| 15 | T | 10257386 | 0.2527  | 2.96E-07 | GPR180, GPCPD1 |
| 16 | A | 1477673  | -0.1892 | 6.53E-06 | —              |
| 16 | G | 1477679  | -0.1891 | 6.78E-06 | —              |
| 20 | A | 8531879  | 0.151   | 3.05E-06 | —              |
| 22 | A | 1992485  | -0.3972 | 6.51E-09 | GALNT, AUTS2   |
| 22 | A | 1992518  | -0.3973 | 7.69E-09 | GALNT, AUTS2   |
| 22 | G | 1992501  | -0.3974 | 7.94E-09 | GALNT, AUTS2   |
| 22 | C | 1992505  | -0.3974 | 7.94E-09 | GALNT, AUTS2   |
| 22 | C | 1992507  | -0.3974 | 7.94E-09 | GALNT, AUTS2   |
| 22 | G | 1992515  | -0.3974 | 7.94E-09 | GALNT, AUTS2   |
| 28 | C | 3587271  | 0.2936  | 5.81E-08 | PPP1R15B, FGD2 |
| 28 | G | 4472051  | -0.2359 | 2.82E-06 | PPP1R15B, FGD2 |
| 30 | C | 1652158  | -0.3469 | 7.53E-07 | SH2            |
| 30 | T | 1258517  | 0.2205  | 1.48E-06 | SH2            |
| 30 | G | 2422665  | 0.1894  | 2.04E-06 | SH2            |
| 30 | T | 2422666  | 0.1894  | 2.04E-06 | SH2            |
| 30 | A | 1652207  | -0.3289 | 2.3E-06  | SH2            |
| 30 | T | 2269897  | 0.211   | 9.22E-06 | SH2            |
| 32 | G | 655318   | 0.2599  | 7.95E-06 | —              |
| 33 | A | 975487   | 0.2567  | 1.07E-08 | SDHA           |
| 36 | A | 1523127  | -0.3274 | 9.86E-07 | SPRY           |
| 36 | G | 1523132  | -0.3216 | 1.7E-06  | SPRY           |
| 36 | C | 1523105  | -0.3291 | 1.72E-06 | SPRY           |

---

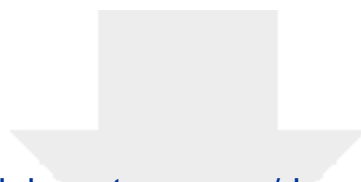

Click here to access/download  
**Supplementary Material**  
Supplemental\_Information 2022.docx

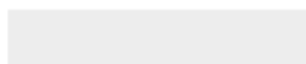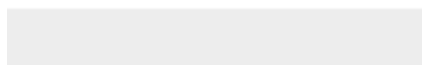

Supplement: giad003_giga-d-22-00016_revision_3.pdf [file giad003_giga-d-22-00016_revision_3.pdf]
