# Supplementary material for: Chromosome-level genome assembly of goose provides insight into the adaptation and growth of local goose breeds
Source: PubMed Central journal article supplement (PMC9896136; doi:10.1093/gigascience/giad003), 2023-02-03
Supplement: giad003_giga-d-22-00016_original_submission.pdf [file giad003_giga-d-22-00016_original_submission.pdf]

# GigaScience

## Chromosome-level genome assembly of goose provides insight into the adaptation and growth of local goose breeds --Manuscript Draft--

|                                                      |                                                                                                                                                                                                                                                                                                                                                                                                                                                                                                                                                                                                                                                                                                                                                                                                                                                                                                                                                                                                                                                                                                                                                                                                                                                                                                                                                                                                                                                                                                                                                                                                                                                                                                           |                |
|------------------------------------------------------|-----------------------------------------------------------------------------------------------------------------------------------------------------------------------------------------------------------------------------------------------------------------------------------------------------------------------------------------------------------------------------------------------------------------------------------------------------------------------------------------------------------------------------------------------------------------------------------------------------------------------------------------------------------------------------------------------------------------------------------------------------------------------------------------------------------------------------------------------------------------------------------------------------------------------------------------------------------------------------------------------------------------------------------------------------------------------------------------------------------------------------------------------------------------------------------------------------------------------------------------------------------------------------------------------------------------------------------------------------------------------------------------------------------------------------------------------------------------------------------------------------------------------------------------------------------------------------------------------------------------------------------------------------------------------------------------------------------|----------------|
| <b>Manuscript Number:</b>                            | GIGA-D-22-00016                                                                                                                                                                                                                                                                                                                                                                                                                                                                                                                                                                                                                                                                                                                                                                                                                                                                                                                                                                                                                                                                                                                                                                                                                                                                                                                                                                                                                                                                                                                                                                                                                                                                                           |                |
| <b>Full Title:</b>                                   | Chromosome-level genome assembly of goose provides insight into the adaptation and growth of local goose breeds                                                                                                                                                                                                                                                                                                                                                                                                                                                                                                                                                                                                                                                                                                                                                                                                                                                                                                                                                                                                                                                                                                                                                                                                                                                                                                                                                                                                                                                                                                                                                                                           |                |
| <b>Article Type:</b>                                 | Research                                                                                                                                                                                                                                                                                                                                                                                                                                                                                                                                                                                                                                                                                                                                                                                                                                                                                                                                                                                                                                                                                                                                                                                                                                                                                                                                                                                                                                                                                                                                                                                                                                                                                                  |                |
| <b>Funding Information:</b>                          | Key Research and Development Program of Guangdong Province (2020B020222001)                                                                                                                                                                                                                                                                                                                                                                                                                                                                                                                                                                                                                                                                                                                                                                                                                                                                                                                                                                                                                                                                                                                                                                                                                                                                                                                                                                                                                                                                                                                                                                                                                               | Not applicable |
|                                                      | Construction of Modern Agricultural Science and Technology Innovation Alliance in Guangdong Province (2021KJ128, 2020KJ128)                                                                                                                                                                                                                                                                                                                                                                                                                                                                                                                                                                                                                                                                                                                                                                                                                                                                                                                                                                                                                                                                                                                                                                                                                                                                                                                                                                                                                                                                                                                                                                               | Not applicable |
|                                                      | National Modern Agricultural Industry Science and Technology Innovation Center in Guangzhou (2018kczx01)                                                                                                                                                                                                                                                                                                                                                                                                                                                                                                                                                                                                                                                                                                                                                                                                                                                                                                                                                                                                                                                                                                                                                                                                                                                                                                                                                                                                                                                                                                                                                                                                  | Not applicable |
|                                                      | Guangdong Provincial Promotion Project on Preservation and Utilization of Local Breed of Livestock and Poultry (4000-F18260)                                                                                                                                                                                                                                                                                                                                                                                                                                                                                                                                                                                                                                                                                                                                                                                                                                                                                                                                                                                                                                                                                                                                                                                                                                                                                                                                                                                                                                                                                                                                                                              | Not applicable |
|                                                      | Guangdong Basic and Applied Basic Research Foundation (2019A1515012006)                                                                                                                                                                                                                                                                                                                                                                                                                                                                                                                                                                                                                                                                                                                                                                                                                                                                                                                                                                                                                                                                                                                                                                                                                                                                                                                                                                                                                                                                                                                                                                                                                                   | Not applicable |
| <b>Abstract:</b>                                     | <p>Background: Anatidae contains numerous waterfowl species with great economic value, but the genetic diversity basis remains insufficiently investigated. Here, we report a chromosome-level genome assembly of Lion-head goose ( <i>Anser cygnoides</i> ), a native breed in South China, through the combination of PacBio, Bionano and Hi-C technologies. Findings: The assembly had a total genome size of 1.19 Gb, consisting of 1,859 contigs with an N50 length of 20.59 Mb, generating 40 pseudochromosomes, representing 97.27% of the assembled genome, and identifying 21,208 protein-coding genes. Comparative genomic analysis revealed that geese and ducks diverged approximately 28.42 million years ago, and geese have undergone massive gene family expansion and contraction. To identify genetic markers associated with body weight in different geese breeds including Wuzong goose, Huangzong goose, Magang goose and Lion-head goose, a genome-wide association study was performed, yielding an average of 1,520.6 Mb of raw data with detecting 44,858 SNPs. GWAS showed that six SNPs were significantly associated with body weight and 25 were potentially associated. The significantly associated SNPs were annotated as LDLRAD4 , GPR180 , OR , enriching in growth factor receptors regulation pathways. Conclusions: We present the first chromosome-level assembly of the Lion-head goose genome, which will expand the genomic resources of the Anatidae family, providing a basis for adaptation and evolution. Candidate genes significantly associated with different goose breeds may serve to understand the underlying mechanisms of weight differences.</p> |                |
| <b>Corresponding Author:</b>                         | Xinheng Zhang<br>South China Agricultural University<br>Guangzhou, Guangdong CHINA                                                                                                                                                                                                                                                                                                                                                                                                                                                                                                                                                                                                                                                                                                                                                                                                                                                                                                                                                                                                                                                                                                                                                                                                                                                                                                                                                                                                                                                                                                                                                                                                                        |                |
| <b>Corresponding Author Secondary Information:</b>   |                                                                                                                                                                                                                                                                                                                                                                                                                                                                                                                                                                                                                                                                                                                                                                                                                                                                                                                                                                                                                                                                                                                                                                                                                                                                                                                                                                                                                                                                                                                                                                                                                                                                                                           |                |
| <b>Corresponding Author's Institution:</b>           | South China Agricultural University                                                                                                                                                                                                                                                                                                                                                                                                                                                                                                                                                                                                                                                                                                                                                                                                                                                                                                                                                                                                                                                                                                                                                                                                                                                                                                                                                                                                                                                                                                                                                                                                                                                                       |                |
| <b>Corresponding Author's Secondary Institution:</b> |                                                                                                                                                                                                                                                                                                                                                                                                                                                                                                                                                                                                                                                                                                                                                                                                                                                                                                                                                                                                                                                                                                                                                                                                                                                                                                                                                                                                                                                                                                                                                                                                                                                                                                           |                |
| <b>First Author:</b>                                 | Qiqi Zhao                                                                                                                                                                                                                                                                                                                                                                                                                                                                                                                                                                                                                                                                                                                                                                                                                                                                                                                                                                                                                                                                                                                                                                                                                                                                                                                                                                                                                                                                                                                                                                                                                                                                                                 |                |
| <b>First Author Secondary Information:</b>           |                                                                                                                                                                                                                                                                                                                                                                                                                                                                                                                                                                                                                                                                                                                                                                                                                                                                                                                                                                                                                                                                                                                                                                                                                                                                                                                                                                                                                                                                                                                                                                                                                                                                                                           |                |

|                                                                                                                                                                                                                                                                                                                                                                                   |                 |
|-----------------------------------------------------------------------------------------------------------------------------------------------------------------------------------------------------------------------------------------------------------------------------------------------------------------------------------------------------------------------------------|-----------------|
| <b>Order of Authors:</b>                                                                                                                                                                                                                                                                                                                                                          | Qiqi Zhao       |
|                                                                                                                                                                                                                                                                                                                                                                                   | Junpeng Chen    |
|                                                                                                                                                                                                                                                                                                                                                                                   | Zi Xie          |
|                                                                                                                                                                                                                                                                                                                                                                                   | Jun Wang        |
|                                                                                                                                                                                                                                                                                                                                                                                   | Keyu Feng       |
|                                                                                                                                                                                                                                                                                                                                                                                   | Wencheng Lin    |
|                                                                                                                                                                                                                                                                                                                                                                                   | Hongxin Li      |
|                                                                                                                                                                                                                                                                                                                                                                                   | Zezhong Hu      |
|                                                                                                                                                                                                                                                                                                                                                                                   | Weiguo Chen     |
|                                                                                                                                                                                                                                                                                                                                                                                   | Feng Chen       |
|                                                                                                                                                                                                                                                                                                                                                                                   | Muhammad Junaid |
|                                                                                                                                                                                                                                                                                                                                                                                   | Huanmin Zhang   |
|                                                                                                                                                                                                                                                                                                                                                                                   | Zhenping Lin    |
|                                                                                                                                                                                                                                                                                                                                                                                   | Qingmei Xie     |
|                                                                                                                                                                                                                                                                                                                                                                                   | Xinheng Zhang   |
| <b>Order of Authors Secondary Information:</b>                                                                                                                                                                                                                                                                                                                                    |                 |
| <b>Additional Information:</b>                                                                                                                                                                                                                                                                                                                                                    |                 |
| <b>Question</b>                                                                                                                                                                                                                                                                                                                                                                   | <b>Response</b> |
| Are you submitting this manuscript to a special series or article collection?                                                                                                                                                                                                                                                                                                     | No              |
| <b>Experimental design and statistics</b>                                                                                                                                                                                                                                                                                                                                         | Yes             |
| <p>Full details of the experimental design and statistical methods used should be given in the Methods section, as detailed in our <a href="#">Minimum Standards Reporting Checklist</a>. Information essential to interpreting the data presented should be made available in the figure legends.</p> <p>Have you included all the information requested in your manuscript?</p> |                 |
| <b>Resources</b>                                                                                                                                                                                                                                                                                                                                                                  | Yes             |
| <p>A description of all resources used, including antibodies, cell lines, animals and software tools, with enough information to allow them to be uniquely identified, should be included in the Methods section. Authors are strongly encouraged to cite <a href="#">Research Resource</a></p>                                                                                   |                 |

|                                                                                                                                                                                                                                                                                                                                                                                                                                                                                                                                                         |            |
|---------------------------------------------------------------------------------------------------------------------------------------------------------------------------------------------------------------------------------------------------------------------------------------------------------------------------------------------------------------------------------------------------------------------------------------------------------------------------------------------------------------------------------------------------------|------------|
| <p><a href="#">Identifiers</a> (RRIDs) for antibodies, model organisms and tools, where possible.</p> <p>Have you included the information requested as detailed in our <a href="#">Minimum Standards Reporting Checklist</a>?</p>                                                                                                                                                                                                                                                                                                                      |            |
| <p><b>Availability of data and materials</b></p> <p>All datasets and code on which the conclusions of the paper rely must be either included in your submission or deposited in <a href="#">publicly available repositories</a> (where available and ethically appropriate), referencing such data using a unique identifier in the references and in the “Availability of Data and Materials” section of your manuscript.</p> <p>Have you have met the above requirement as detailed in our <a href="#">Minimum Standards Reporting Checklist</a>?</p> | <p>Yes</p> |

# 1 **Chromosome-level genome assembly of goose provides insight into** 2 **the adaptation and growth of local goose breeds**

3 **Qiqi Zhao<sup>1,3,5</sup>, Junpeng Chen<sup>2</sup>, Zi Xie<sup>1,3,5</sup>, Jun Wang<sup>4</sup>, Keyu Feng<sup>1,3,5</sup>, Wencheng Lin<sup>1,3,5</sup>, Hongxin**  
4 **Li<sup>1,3,5</sup>, Zezhong Hu<sup>1</sup>, Weiguo Chen<sup>1,3,5</sup>, Feng Chen<sup>1,3</sup>, Muhammad Junaid<sup>4</sup>, Huanmin Zhang<sup>6</sup>,**  
5 **Zhenping Lin<sup>2\*</sup>, Qingmei Xie<sup>1,3,5\*</sup>, Xinheng Zhang<sup>1,3,5\*</sup>**

6 <sup>1</sup>Heyuan Branch, Guangdong Provincial Laboratory of Lingnan Modern Agricultural Science and  
7 technology & Guangdong Provincial Key Lab of Agro-Animal Genomics and Molecular Breeding,  
8 College of Animal Science, South China Agricultural University, Guangzhou, Guangdong 510642,  
9 China; <sup>2</sup>Shantou Baisha Research Institute of Original Species of Poultry and Stock, Shantou,  
10 Guangdong 515000, China; <sup>3</sup>Department of Science and Technology of Guangdong Province, Key  
11 Laboratory of Animal Health Aquaculture and Environmental Control, Guangzhou, Guangdong 510642,  
12 China; <sup>4</sup>College of Marine Sciences, South China Agricultural University, Guangzhou, Guangdong,  
13 510642, China; <sup>5</sup>Guangdong Engineering Research Center for Vector Vaccine of Animal Virus,  
14 Guangzhou, 510642, China and <sup>6</sup>Avian Disease and Oncology Laboratory, Agriculture Research Service,  
15 United States Department of Agriculture, East Lansing, MI, 48823, USA

16 \* Correspondence address:

17 Zhenping Lin, Shantou Baisha Research Institute of Original Species of Poultry and Stock, Shantou,  
18 China. E-mail: Linzp02@163.com; Qingmei Xie and Xinheng Zhang, College of Animal Science, South  
19 China Agricultural University, Guangzhou, China. E-mails: qmx@scau.edu.cn (Q.X.);  
20 xhzhang@scau.edu.cn (X.Z.)

21 **running title:** Goose chromosome-level Genome Assembly

22 **Abstract**

23 **Background:** *Anatidae* contains numerous waterfowl species with great economic value, but the  
24 genetic diversity basis remains insufficiently investigated. Here, we report a chromosome-level genome  
25 assembly of Lion-head goose (*Anser cygnoides*), a native breed in South China, through the combination  
26 of PacBio, Bionano and Hi-C technologies. **Findings:** The assembly had a total genome size of 1.19 Gb,  
27 consisting of 1,859 contigs with an N50 length of 20.59 Mb, generating 40 pseudochromosomes,  
28 representing 97.27% of the assembled genome, and identifying 21,208 protein-coding genes.  
29 Comparative genomic analysis revealed that geese and ducks diverged approximately 28.42 million  
30 years ago, and geese have undergone massive gene family expansion and contraction. To identify genetic  
31 markers associated with body weight in different geese breeds including Wuzong goose, Huangzong  
32 goose, Magang goose and Lion-head goose, a genome-wide association study was performed, yielding  
33 an average of 1,520.6 Mb of raw data with detecting 44,858 SNPs. GWAS showed that six SNPs were  
34 significantly associated with body weight and 25 were potentially associated. The significantly  
35 associated SNPs were annotated as *LDLRAD4*, *GPR180*, *OR*, enriching in growth factor receptors  
36 regulation pathways. **Conclusions:** We present the first chromosome-level assembly of the Lion-head  
37 goose genome, which will expand the genomic resources of the *Anatidae* family, providing a basis for  
38 adaptation and evolution. Candidate genes significantly associated with different goose breeds may  
39 serve to understand the underlying mechanisms of weight differences.

40 **Keywords:** Lion-head goose, Genome assembly, Comparative genome, Genome-wide association study

41

## 42 **Introduction**

43 The *Anatidae* is a family of the ancient *Aves* class with order *Anseriformes*, containing 43 genera  
44 and 174 species, including the majority of birds, such as ducks, geese, swans, and is the most prominent  
45 family of wandering birds [1]. Physical characteristics and features vary significantly among species,  
46 making the *Anatidae* family rich in diversity and specificity. *Anatidae* adults are usually herbivores,  
47 feeding on a variety of aquatic plants, which are well suited to sustainable production practices thereby  
48 reducing competition for human food; and some species are even used for crop weeds and pests control  
49 [1, 2]. For a long time, duck and goose feathers have been popular in pillows, quilts and coats [3].  
50 Several species in the genus *Anser* are commercially important and domesticated as poultry because of  
51 their unique warmth retention properties and meat-producing performance. According to archaeological  
52 evidence, geese were domesticated around 6,000 years ago near the Mediterranean Sea, and later spread  
53 around the world due to human activities [4]. It is widely believed that *Anser cygnoides* is the ancestor  
54 of the Chinese goose (*Anser cygnoides domesticus*) with a domestication history of more than 3,000  
55 years [1]. After artificial domestication, the domestic goose has increased its cold tolerance and  
56 roughage-resistance, but its wings are degraded and weakened in flight, unable to travel long distances  
57 [1]. Egg-laying rate and goslings survival rate are also improved compared to wild swans, and the  
58 lifespan is longer [5]. Furthermore, overfeeding can cause foie gras to be at least three-fold larger than  
59 the normal size while the goose remains healthy, making the goose a good model to study human liver  
60 steatosis [6]. Chinese domestic geese, a natural gene pool, contain a variety of native breeds with diverse  
61 phenotypes [7]. One interesting phenomenon we found here is that the weight of adult domestic geese  
62 varies greatly in the same region, for example, the Lion-head goose in Shantou (116°14'-117°19' E,  
63 23°02'-23°38' N), Guangdong Province, can weigh more than 9 kg, while the Wuzong goose in  
64 Qingyuan (111°55'-113°55' E, 23°31'-25°12' N), Guangdong Province, the average weight is only about  
65 3 kg [8, 9]. However, the mechanisms for such differences have not been clarified, let alone being  
66 resolved at the genomic level. Therefore, a complete, continuous and accurate reference genome is  
67 essential, for deciphering genomic diversity, evolutionary and adaptive processes, and the industry's

68 development.

69 High-quality genome assembly sequences enable us to comprehensively and scientifically decode  
70 the genetic diversity of species, explore disease mechanisms, and understand species evolution. Recently,  
71 Pacbio has offered technology that can generate reads several thousand bases in size, and these long  
72 reads can span repetitive regions [10]. Although these long reads have a high error rate, they can be  
73 integrated with Illumina's short reads technology to improve accuracy [11]. In addition, new scaffold  
74 techniques, such as high-throughput chromosome conformation capture (Hi-C), allow the genome to be  
75 assembled to the level of whole chromosomes [12]. Pacbio single molecule real-time (SMRT)  
76 sequencing technology has been extensively used in the study of human diseases such as tuberculosis  
77 and influenza virus [13], as well as in the study of species evolution, such as the centromere of the  
78 human Y chromosome [14].

79 In this study, we report the genome assembly at the chromosome level in Lion-head geese for the  
80 first time using combined data generated by four advanced technologies, Illumina, SMRT, Bionano, and  
81 Hi-C. In addition, we investigated the genetic basis of body weight correlation in Lion-head goose,  
82 Wuzong goose, Huangzong goose and Magang goose by genome-wide association analysis, trying to  
83 identify the genes involved in body weight determination from different species. These will offer  
84 valuable resources for facilitating genetic research and the improvement of the species and for studying  
85 speciation and evolution in geese.

## 86 **Methods**

### 87 **Animal selection**

88 An adult healthy purebred male Lion-head goose (*Anser cygnoides*) with classical traits was selected for  
89 whole-genome sequencing and conducting *de novo* assembly from Shantou Baisha Research Institute  
90 of Original Species of Poultry and Stock. Blood and eight tissues (i.e., brain, pharyngeal pouch, head  
91 sarcoma, spleen, liver, chest muscle, kidney, and heart) from another four healthy adult accessions were  
92 collected for RNA-seq analysis. All applicable institutional and national guidelines for the care and use  
93 of animals were followed. All the animal work in this study was approved by the South China

94 Agricultural University Committee for Animal Experiments (approval ID: SYXK 2019-0136). All the  
95 research procedures and animal care activities were conducted based on the principles stated in the  
96 National and Institutional Guide for the Care and Use of Laboratory Animals.

### 97 **Genome survey library construction and sequencing**

98 To survey the genome profile, high-quality genomic DNA was extracted from the blood of the reference  
99 individual for whole-genome sequencing using the Qiagen Blood and Cell Culture DNA Midi Kit  
100 according to the manufacturer's instructions. For the quality control of purity, concentration, and  
101 integrity, we used Qubit 2.0 Fluorometry (Life Technologies, USA), NanoDrop 2000 spectrophotometer  
102 (Thermo Scientific), and pulse-field gel electrophoresis (Bio-rad CHEF-DR II), respectively. The  
103 following steps used for DNA extraction and quality control were similar. The short paired-end Illumina  
104 DNA library was constructed using the Illumina HiSeq system (with the paired-end 350 bp sequencing  
105 strategy). After performing the sequencing and obtaining the data, the k-mer analysis of reads for the  
106 genome survey was calculated by the Jellyfish program with the default parameters. Additionally, the  
107 genome size, heterozygosity ratio, and repeat sequence ratio were calculated with the GenomeScope  
108 tool based on the k-mer frequency of 17.

### 109 **Genome sequencing and assembly strategies**

110 A 40 kb *de novo* library for SMRT genome sequencing was constructed using the PacBio Sequel III  
111 platform (Pacific Biosciences, USA). All of these reads were used for contigs assembly. A scalable and  
112 accurate long-read assembly tool, Canu (v1.8) [15], was employed to correct and assemble the PacBio  
113 reads with the listed parameters (minThreads = 4, genome size = 1200m, minOverlapLength = 700,  
114 minReadLength = 1000). The resulting contigs and corrected reads were used as inputs for HERA [16]  
115 to fill the gaps and produce longer contigs with default parameters. After that, Illumina paired-end clean  
116 data were mapped to the corrected contigs with the Burrows-Wheeler Aligner (BWA) [17], and the  
117 results were filtered by Q30 with Samtools (v1.8) [18]. At last, Pilon (v1.22) [19] was used to polish the  
118 assembly and enhance the base accuracy of the contigs.

119 Physical optical genome maps from BioNano were used to improve the assembly quality of the  
120 genome, with the ultimate goal of generating a chromosome-scale assembly. Nuclear DNA was



121 extracted from the blood sample of the reference individual and digested with nickase Direct Labeling  
122 Enzyme I. After labeling, repairing and staining reactions, DNA was loaded onto the Saphyr Chip for  
123 sequencing to generate BioNano molecules. Afterward, the data were assembled with RefAligner and  
124 Assembler of BioNano Solve. The scaffold was established using BioNano Solve with HERA's contigs  
125 and a BioNano genome map. When encountering a conflict between a contig and the genome map, the  
126 contig was split to correct the false connection.

127 For Hi-C library, fresh blood was vacuum-infiltrated with 2% formaldehyde solution and then used  
128 for cross-link action. Later nuclear DNA was isolated from the reference animal and digested with the  
129 restriction enzyme Mbo I. The Hi-C library with insertion sizes of 350 bp was constructed and sequenced  
130 on the Illumina HiSeq X Ten instrument. The Hi-C reads were assigned to the scaffolds by Juicer [20].  
131 The scaffolds were further clustered, ordered, and oriented to the chromosome-level scaffolds by 3D-  
132 DNA [21]. Thus, a heatmap of Hi-C chromosomal interaction was created using the HiC-pro software  
133 [22].

#### 134 **RNA-Seq and transcripts assembly**

135 RNA-seq was conducted on blood and eight different tissues (i.e., brain, pharyngeal pouch, head  
136 sarcoma, spleen, liver, chest muscle, kidney, and heart) from four healthy adult accessions. Total RNA  
137 was extracted from four individuals using the TRIZOL reagent and purified following the  
138 manufacturer's protocols. The concentration and quality of the isolated RNA were assessed using the  
139 Nanodrop Spectrophotometer, Qubit 2.0 Fluorometry, and the Agilent 2100 bioanalyzer (Agilent  
140 Technologies, USA). Libraries construction and sequencing were performed using the Illumina  
141 NovaSeq 6000 platform. Raw RNA-seq data with 150 bp paired-end reads were trimmed for quality  
142 using Trimmomatic [23]. Thus, the Illumina sequence adaptors were removed, then low-quality and  
143 polluted reads were trimmed. Furthermore, Trinity [24] was arranged to *de novo* assemble the data after  
144 quality filtering. To remove redundant sequences, CD-HIT [25] was employed to remove highly  
145 identical transcript isoforms, retaining only the longest one. After filtering, the RNA-seq reads were  
146 mapped to the assembled genome using the default parameters of STAR [26].

#### 147 **Assembly evaluation**

148 Finishing the genome assembly, quality control for the assembly's quality, accuracy, and integrity was  
149 predicted by Benchmarking Universal Single-Copy Orthologs (BUSCO, v 3.0), using aves\_odb10 as  
150 the query [27].

### 151 **Genome annotation**

152 The genome assembly was annotated by MAKER, mainly including gene annotation and repeat  
153 annotation. The detailed pipeline was based on proteins from the Uniprot, the *de novo* assembly of RNA-  
154 seq data, and the total proteins of the relative species *Anser cygnoides* [28]. The transposable elements  
155 (TE) associated genes that were filtered out by the TEseeker database, and the results were used to  
156 conduct functional annotation using InterProScan. The repeat sequencing library was identified and  
157 annotated by a combination of LTR-FINDER and RepeatModeler. RepeatMasker and the query species  
158 "Chicken" were used to mask the repeats in the assembly, based on the Repbase database and the  
159 previous repeat sequence library. Tandem repeats were discovered by the Tandem Repeats Finder [29].

### 160 **Gene families and phylogenetic analysis**

161 Interspecific syntenic blocks between the Lion-head goose and duck were explored using MCscan [30]  
162 after coding sequence alignment by BLASTn. The same method was used for intraspecific collinearity  
163 analysis. To gain insight into the gene family evolution of the goose, we compared the gene families of  
164 Lion-head goose with the genomes of the following avian species: Zhedong white goose, duck, turkey,  
165 chicken, pigeon, saker, titmouse, and green lizard. Initially, alternative splicing and genes encoding less  
166 than 50 amino acids with a proportion of stop codon greater than 20% were filtered; meanwhile, the  
167 longest transcript of genes with multiple isoforms was retained to represent the gene. Similarity  
168 relationships among the protein sequences of species were aligned by BLASTP algorithm and clustered  
169 using OrthoMCL methodology with an expansion coefficient of 1.5 to obtain single- and multiple-copy  
170 gene families, and specific gene families of Lion-head goose. The sequences of the single-copy gene  
171 families were employed to perform multiple alignments by MUSCLE. Then RAxML [31] was used to  
172 construct a phylogenetic tree of nine species, with the lizard being designated an outgroup. Taking the  
173 divergence time of the pigeon and turkey (92.9Mya) as the calibration, the r8s [32] software was served  
174 to estimate the divergence time of the species and construct ultrametric trees. After filtering out gene

175 families with gene counts of more than 100 in some individual species, CAFÉ [33] was employed to  
176 detect gene families that had undergone expansion or contraction per million years independently along  
177 each branch of the phylogenetic tree. Subsequently, a gene ontology (GO) enrichment analysis of gene  
178 families was performed using the clusterProfiler package in R [34].

### 179 **Experimental sample processing and genotyping**

180 Blood samples of 514 geese were collected and stored in 2 mL tubes containing ACD anticoagulant for  
181 DNA extraction, and the weight of the geese was recorded. It was considered as a continuous trait rather  
182 than a categorical trait in the different goose control analyses of this study. This is due to the fact that  
183 continuous data are better for a small number of samples, only 514 individuals were analyzed in this  
184 study; continuous data can avoid some bias and are more sensitive and powerful to obtain more  
185 dependable results. DNA was extracted from blood samples using the HiPure Blood DNA Mini Kit  
186 (Magenbio, Guangzhou, China). The samples that passed the quality testing were subjected to library  
187 construction using Easy DNA Library Prep Kit (MGI, Shenzhen, China) and paired-end 100 sequencing  
188 using MGISEQ 500. Raw data were filtered for adaptors and low quality reads using SOAPnuke software,  
189 and the filtered sequences were compared with the constructed goose reference genome using BWA  
190 software. Then variant detection as well as genotyping was performed using Samtools, GATK4 software.  
191 Variants were filtered based on a minimum allele frequency threshold of 0.05, a Hardy Weinberg  
192 equilibrium test significance threshold of  $10e-7$ , and a maximum deletion rate threshold of 0.7. Principal  
193 component analysis (PCA) was performed and plotted with R. To understand the kinship among the  
194 samples, and phylogenetic trees were constructed.

### 195 **Genome-wide association study**

196 The sample variation was analyzed with the corresponding weight information using the asymptotic  
197 Wald test (assoc) in Plink. Combining the top 20 principal component values in the PCA analysis as  
198 covariates, the sample variances with the corresponding weight information were subjected to the linear  
199 analysis in Plink, that is, regression analysis with the inclusion of covariates. The variances with  
200 Bonferroni corrected p-values less than 0.05 in the results of the assoc and linear analyses were  
201 annotated. The corresponding genes of significantly related SNPs were used to identify the GO pathway.

## 202 **Statistical analysis**

203 R was used for statistical analyses.  $p < 0.05$  was considered significant.

## 204 **Results**

### 205 **Genome sequencing and assembly**

206 The Lion-head goose is a famous local variety in China and one of the most giant goose breeds  
207 worldwide, with a unique appearance and social benefits. Here, we attempt to construct a highly  
208 continuous chromosome-scale genome of an adult purebred male Lion-head goose with a high degree  
209 of homozygosity to minimize heterozygous alleles. The following sequencing strategies were applied:  
210 Illumina sequencing, Pacbio SMRT sequencing, BioNano optical mapping, and Hi-C (**Supplementary**  
211 **Table S1**). Assemble these data step by step and produce progressively improved assemblies (**Fig. 1A**).  
212 A total of 185.37 Gb of high-quality Pacbio long reads were generated, representing a  $\sim 168\times$  depth of  
213 the estimated 1.05 Gb genome with heterozygosity of 0.335% based on the k-mer analysis of the  
214 Illumina sequences (**Fig. 1B, Supplementary Table S2**). Combining the *de novo* assembly of the Illumina  
215 and Pacbio sequences resulted in a draft genome of 1.20 Gb, yielding 1,859 contigs with a length of  
216 13.7 Mb for contig N50 and 57.6 Mb for the longest (**Table 1**). Furthermore, with the help of BioNano  
217 optical mapping, the scaffold N50 value was increased to 37 Mb. To obtain a chromosome-scale  
218 assembly, a set of  $\sim 230$  Gb Hi-C data was used to orient, order, phase, and anchor the contigs.  
219 Approximately 97.27% of the reads assembled were anchored to 40 high-confidence pseudo-  
220 chromosomes (39 autosomes and Z chromosome) using the high-density genetic map (**Fig. 1C, Fig. 2**).  
221 After polishing, we finally assembled the ultimate genome into 1.19 Gb with the final contig N50 of  
222 20.59 Mb and scaffold N50 of 25.8 Mb, with a GC content of 42.39% (**Table 1, Supplementary Table**  
223 **S2**). The structure and quality of the assembled genome were determined by mapping a Hi-C  
224 chromosomal contact map.

225 The completeness of the Lion-head goose genome assembly was assessed using the BUSCO gene set.  
226 The result showed that almost 99.02% of the reads were correctly mapped to the genome. We then  
227 evaluated the assembled genome with 98.24% single-copy and 1.76% duplicated orthologs from the

228 BUSCO dataset, confirming that 8,081 genes (96.92%) were intact in this genome. These results indicate  
229 the high reliability and integrity of the assembled genome (**Table 2, Supplementary Figure S1**).

### 230 **Genome annotation**

231 To support the genome annotation, we conducted RNA-Seq analysis using RNA samples of blood and  
232 eight tissues (brain, pharyngeal pouch, head sarcoma, spleen, liver, chest muscle, kidney, and heart)  
233 from four healthy adult animals. The aggregate of 760 Gb raw reads was accumulated by the paired-end  
234 sequencing of the 36 constructed libraries. After filtering the adaptor and low-quality sequences, 723  
235 Gb qualified Illumina reads remained, *de novo* assembled into unique transcripts (unigenes). Overall, a  
236 total of 216,229 unigenes were assembled and at the level N50, 5,082 nucleotides were obtained. Total  
237 21,208 protein-coding gene annotations were predicted in Lion-head goose by combining *de novo*  
238 prediction, homologous protein prediction, and transcription alignment. After filtering TE-related genes,  
239 a total of 21,010 protein-coding gene annotations were finally obtained by the TE seeker database (**Fig.**  
240 **2**). Furthermore, a total of 8.15% repeat sequence and 4.10% tandem repeats of the genome were  
241 detected (**Table 3 and Supplementary Table S3**).

### 242 **Phylogenetic analysis**

243 To investigate the genomic evolution of poultry, we compared the sequences of eight bird species (Lion-  
244 head goose, Zhedong white goose, duck, turkey, chicken, pigeon, saker, and titmouse) and green lizard,  
245 clustering the genes into 15,162 gene families (**Fig. 3A, Table 4**). Among these, 6,422 single-copy gene  
246 families were identified and used to construct a phylogenetic tree (**Fig. 3B**). This revealed that the geese  
247 and ducks were clustered into a subclade that probably evolved from a common ancestor approximately  
248 28.42 million years ago (Mya). As expected, the Lion-head goose displayed a close relationship with  
249 the Zhedong white goose. The divergence time between the Lion-head goose and Zhedong white goose  
250 was estimated to be 13.79 Mya, and that between chicken and turkey was nearly 25.07 Mya. The above  
251 results confirmed the reliability of the tree.

252 Of all the gene families in the Lion-head goose, 4,233 gene families were significantly expanded and  
253 324 were contracted. Compared with Zhedong white goose, the Lion-head goose had more gene families

254 and there are also more events of gene family expansion and contraction. Moreover, we mixed the gene  
255 family sets of several *Anatidae* varieties (duck, Zhedong white goose, Lion-head goose), and performed  
256 expansion and contraction analysis and corresponding GO enrichment analysis. In this task, the GO  
257 analysis of expanded gene families suggested the olfactory perception, such as detection of chemical  
258 stimulus involved in sensory perception of smell (GO:0050911,  $p = 6.97 \times 10^{-8}$ ), and odorant-binding  
259 (GO:0005549,  $p = 1.47 \times 10^{-5}$ ), both of which may be related to the adaptation of the species to find food  
260 in water (**Fig. 4A, Supplementary Table S4**). Meanwhile, contracted gene families were concentrated  
261 in the areas of glucose synthesis and metabolism, such as hexokinase activity (GO:0004396,  $p =$   
262  $7.64 \times 10^{-26}$ ), glucose binding (GO:0005536,  $p = 2.30 \times 10^{-22}$ ), cellular glucose homeostasis (GO:0001678,  
263  $p = 6.84 \times 10^{-18}$ ), glycolytic process (GO:0006096,  $p = 1.75 \times 10^{-15}$ ), hexose metabolic process  
264 (GO:0019318,  $p = 2.66 \times 10^{-14}$ ), carbohydrate phosphorylation (GO:0046835,  $p = 1.68 \times 10^{-9}$ ), and glucose  
265 6-phosphate metabolic process (GO:0051156,  $p = 1.27 \times 10^{-9}$ ), which may be closely related to  
266 characteristics of glycogen storage and utilization during migration (**Fig. 4B, Supplementary Table**  
267 **S5**). Besides, 220 unique gene families (other species lack these gene families) of the Lion-head goose  
268 were identified and functionally annotated in GO categories, such as protein kinase activity  
269 (GO:0004672,  $p = 6.85 \times 10^{-9}$ ), the regulation of apoptotic process (GO:0042981,  $p = 5.78 \times 10^{-34}$ ), the  
270 adenylate cyclase-modulating G protein-coupled receptor signaling pathway (GO:0007188,  $p =$   
271  $5.92 \times 10^{-3}$ ), and fatty-acyl-CoA reductase (alcohol-forming) activity (GO:0080019,  $p = 8.94 \times 10^{-5}$ , **Fig.**  
272 **4C, Supplementary Table S6**). Interestingly, we annotated a reproduction-related protein in the species-  
273 specific gene family, Sterile (Pfam ID: PF03015), acting on fatty-acyl-CoA reductase (alcohol-forming)  
274 activity, which may be related to the low reproductive rate caused by congenital infertility in geese.

275 Collinearity analysis allows one to judge molecular evolutionary events between species and explain  
276 the structural differences between the two genomes. We identified synteny blocks among avian genomes  
277 and found high collinearity between our assembly and the duck genome (genome size =1.19 Gb). Here,  
278 multiple chromosomes (Chr 1-5, 10, 12, 15, 17-20, 23, 26, 27, 29, 30, 32, 34, 36, 37, 39) of Lion-head  
279 goose were almost one-to-one collinear with those of the duck, but some chromosomal rearrangements  
280 occurred (**Fig. 3C, Supplementary Figure S2**). For example, on some chromosomes like Chr 1, 2, 3,

281 and 4 of the duck genome, genes break and rearrange on the Lion-head goose genome, resulting in  
282 sequential inversion. In addition, some scaffolds such as Chr 9, 24, 25, 31, 35, 38 and 40, were not  
283 correlated with any chromosome of the duck genome due to the presence of a large number of tandem  
284 repeats. These results indicate that chromosome inversion and interchromosomal recombination may  
285 have occurred specifically in Lion-head goose during the evolutionary process, but this requires further  
286 investigation and verification. Moreover, Chr 4 of Lion-head goose was found to correspond to the sex  
287 chromosome Z of duck, except for the inversions of small patches of segments; therefore, we inferred  
288 that Chr 4 was the sex chromosome of the Lion-head goose. This information will be fundamental for  
289 comparative genomic studies in *Anatidae* animals.

### 290 **Cluster analysis of different goose species**

291 Blood samples were collected from 514 geese (including Lion-head goose, Wuzong goose, Huangzong  
292 goose and Magang goose), and their weight was recorded, with the Lion-head goose using the minimum  
293 weight, the Wuzong goose using the maximum weight, and the Huangzong goose and Magang goose  
294 using the average weight. That is, the Lion-head goose weighed at least 9 kg, the Wuzong goose weighed  
295 at most 2.5 kg, the Huangzong goose weighed about 3-4 kg, and the Magang goose weighed 4.8-5.5 kg.  
296 The average raw data was 1,520.60 Mb, the average sequencing depth was 12.05×, the average coverage  
297 was 7.56%, the average matching rate was 91.31%, and 44,858 SNP loci were retained for subsequent  
298 analysis after screening SNPs with minimum allele frequency <5%, Hardy-Weinberg equilibrium test  
299 significance threshold of 10e-7, and maximum deletion rate threshold of 0.7. We reconstructed the goose  
300 population structure using SNP data, revealing four distinct subpopulations. The PCA results  
301 demonstrated that the Lion-head Goose population was clearly distinguishable from the Magang Goose,  
302 Wuzong Goose and Huangzong Goose, and there was a clear differentiation within the species (**Fig. 5A**).  
303 The clustering of Magang Goose and Huangzong Goose was closer together, probably related to their  
304 closer geographical location and the existence of some genetic exchange. The phylogenetic tree results  
305 were consistent with the PCA results. The clustering of Magang Goose and Huangzong Goose was  
306 closer to each other, and they clustered into one branch with Wuzong Goose (**Fig. 5B**).

### 307 **Variation identification from four different kinds of goose**

308 From the Manhattan plot (**Fig. 5C**), a total of 10 significant signals were found to be associated with  
309 body weight trait in geese at the genome-wide level, including one significant SNP detected on Chr 2,  
310 8, 9, and 33 respectively ( $-\log_{10}(\text{Pvalue}) > 7.30$ ), and six significant SNPs annotated by two genes on  
311 Chr 22, with the closest Manhattan plot SNP peak on Chr 9 for the gene *OR* (Olfactory receptor). Six  
312 significant SNPs on Chr 22 are located between 1,992,485 and 1,992,520 bp, a region that spans only a  
313 physical distance of 35 bp but contains six SNP loci, making it necessary to analyze these SNPs in this  
314 small region in detail to determine whether multiple QTL are involved. The most significant SNP in this  
315 region could explain about 8.19% of the phenotypic variation. Apart from significant SNPs, potentially  
316 significant QTLs were detected on many chromosomes (including Chr 2, 3, 6, 7, 10, 11, 15, 16, 20, 28,  
317 30, 32, 36), with a total of 25 implied significant SNPs ( $4.90 < -\log(\text{Pvalue}) < 7.30$ ). On Chr 30, the  
318 suggestively significant SNPs were located between 1,258,517 and 2,422,666 bp, spanning  
319 approximately 1.16 Mb, with the most significant SNPs in this region explaining approximately 6.12%  
320 of the phenotypic variation (**Table 5**). In the present study, we identified genes in the region near the  
321 significant SNPs, annotating a total of 21 genes. These genes may be important in mediating growth and  
322 development, and we hypothesize that the *LDLRAD4* gene may play a key role in developmental  
323 plasticity in geese, while the *GPR180* gene may regulate the locomotor behavior of geese to make them  
324 stronger (**Fig. 6**).

## 325 **Discussion**

326 Despite the importance of the genus *Anser*, an economically important animal, the relative scarcity of  
327 genomic resources has largely hindered progress in studying genome evolution and molecular breeding  
328 in the major animals. High-quality chromosome-level genomes can provide key resources for studying.  
329 This study describes a chromosome-scale assembly of Lion-head goose obtained by a combination of  
330 data from the Illumina, SMRT, BioNano, and Hi-C platforms. The genome assembly is 1.19 Gb in length,  
331 and more than 97.27% of the assembled genome is anchored on 40 chromosomes. The BUSCO  
332 assessment revealed 99.02% complete genes in the assembled genome, making it a better-continuity and  
333 higher-quality genome assembly than the recently published Tianfu goose genome [35]. Compared with



334 the cultivated breed Tianfu goose, Lion-head goose, a traditional native breed, should occupy a more  
335 prominent position in the germplasm resources, and its evolving message can provide a reference for  
336 other local breeds which is worthy of in-depth study. Comparative genomic analysis revealed the genetic  
337 basis of interesting characters, which helped elucidate important biological implications and obtain  
338 solutions for genomic evolution between Lion-head geese and other species of *Anatidae* family,  
339 facilitating future genetic breeding programs. This is the first chromosomal level reference genome of  
340 Lion-head goose, providing important genomic data for the study of the family *Anatidae*.

341 We have identified genes associated with body weight traits in four different goose species, through  
342 GWAS analysis. Recently, there have been several studies related to agricultural traits that have achieved  
343 success in animal GWAS projects, for example, GWAS for improving reproductive performance and  
344 egg quality in geese and *TMEM161A* gene for embryo development [36]. In this study, *LDLRAD4*  
345 (low-density lipoprotein receptor class A domain containing 4), *OR* (Olfactory receptor), and  
346 *GPR180* (G protein-coupled receptor 180) were mainly found to function in body weight traits.  
347 Knockdown of *LDLRAD4* enhances transforming growth factor (TGF)- $\beta$ -induced cell migration, which  
348 in turn regulates cell growth, differentiation, motility, apoptosis and matrix protein production [37]. The  
349 olfactory receptor (*OR2AT4*) has been shown to stimulate the proliferation of keratin-forming cells in  
350 peripheral human tissues [38]. *GPR180*, a component of the TGF- $\beta$  signaling pathway, also has  
351 metabolic relevance in the body and may play an essential role in regulating adipose tissue and systemic  
352 energy metabolism [39]. Here we found some correlation between these genes and the TGF- $\beta$  signaling,  
353 presumably this pathway also acts on body weight. Identifying of molecular genetic markers and the  
354 main effect QTL associated with critical agricultural traits is of great interest to breeders. Nevertheless,  
355 the candidate genes identified in this study were only detected by sequencing data and not  
356 experimentally validated. The functions of these candidate SNPs and gene markers need to be further  
357 verified by experimental results or other techniques. Thus, the findings in our GWAS study represent a  
358 valuable resource for geese and provide a new opportunity and basis for geneticists and breeders to work  
359 together to explore the genetics behind various agricultural traits.

360 **Conclusions**

361 In summary, we have obtained a high-quality chromosome-scale draft assembly of a purebred Lion-  
362 head goose, which provides a genetic basis for understanding the acquisition of related traits and  
363 facilitates advances in goose genomics and genetic improvement. Moreover, the candidate genes and  
364 their variants identified in this study will help clarify our understanding of goose selective breeding and  
365 the development of new breeds. The obtained genome sequence of Lion-head goose is a vital addition  
366 to the genome of genus *Anser* and is valuable for further understanding goose molecular breeding  
367 strategies. This genomic resource is also of high value for evolutionary studies of closely related species.

368 **Data Availability**

369 The final genome assembly data supporting the results of this article is available in the NCBI BioProject  
370 repository, [Accession number: PRJNA736831]. The raw re-sequencing genome data supporting of the  
371 GWAS study is available in the NCBI BioProject repository [Accession number: PRJNA552198,  
372 PRJNA552383, and PRJNA552384].

373 **Additional Files**

374 Supplementary Figure S1. BUSCO assessment of the assembly genome of Lion-head goose.

375 Supplementary Figure S2. Gene synteny between the Lion-head goose and duck genomes.

376 Supplementary Table S1. Statistics of sequenced clean data.

377 Supplementary Table S2. Statistics of genome survey.

378 Supplementary Table S3. Summary of repetitive sequence identification.

379 Supplementary Table S4. GO annotation of expanded gene families from Anatidae varieties (Duck,  
380 Zhedong white goose, Lion-head goose; Top 20).

381 Supplementary Table S5. GO annotation of contraction gene families from Anatidae varieties (Duck,  
382 Zhedong white goose, Lion-head goose; Top 20).

383 Supplementary Table S6. GO annotation of unique gene families from the Lion-head goose.

384 **Abbreviations**

385 BLAST: Basic Local Alignment Search Tool; BWA: Burrows-Wheeler Aligner; BUSCO:

386 Benchmarking Universal Single-Copy Orthologs; Chr: chromosome; GATK4: Genome Analysis Toolkit  
387 4; Gb: gigabase pairs; GO: gene ontology; GPR180: G protein-coupled receptor 180; GWAS: genome-  
388 wide association study; HERA: Highly Efficient Repeat Assembly; Hi-C: high-throughput chromosome  
389 conformation capture; Kb: kilobase pairs; kg: kilogram; LDLRAD4: low-density lipoprotein receptor  
390 class A domain containing 4; LTR: long terminal repeat; Mb: megabase pairs; Mya: million years ago;  
391 NCBI: National Center for Biotechnology Information; OR: Olfactory receptor; OR2AT4: olfactory  
392 receptor family 2 subfamily AT member 4; PacBio: Pacific Biosciences; PCA: Principal component  
393 analysis; QTL: quantitative trait locus; RAxML: Randomized Axelerated Maximum Likelihood; RNA-  
394 seq: RNA sequencing; SMRT: single molecule real-time; SNP: single-nucleotide polymorphism; STAR:  
395 Spliced Transcripts Alignment to a Reference; TE: transposable element; TGF: transforming growth  
396 factor; TMEM161A: Transmembrane protein 161A.

### 397 **Competing Interests**

398 The authors declare that they have no conflict of interest.

### 399 **Funding**

400 This work was supported by the Key Research and Development Program of Guangdong Province  
401 (2020B020222001), the Construction of Modern Agricultural Science and Technology Innovation  
402 Alliance in Guangdong Province (2021KJ128, 2020KJ128), the National Modern Agricultural Industry  
403 Science and Technology Innovation Center in Guangzhou (2018kczx01), the Guangdong Provincial  
404 Promotion Project on Preservation and Utilization of Local Breed of Livestock and Poultry (4000-  
405 F18260), the Guangdong Basic and Applied Basic Research Foundation (2019A1515012006). The  
406 authors would like to thank the BGI in Shenzhen for their work on genome sequencing. We also thank  
407 the staff of Minglead Gene for providing the technical and computing support during the research.

### 408 **Author's Contributions**

409 Q.X., Z.L., and X.Z. conceived and designed the research. X.Z., J.C., and Q.Z. coordinated the project.  
410 J.C. and Z.L. provided animal samples. Q.Z. and Z. X. collected and prepared the samples. Q.Z.  
411 performed sequencing, assembly and bioinformatics analysis. W.L., and F.C. led work identifying genes,

412 and H.L., W.C. aided with many aspects of gene identification and did the GO analyses. Q.Z., X.Z.  
413 wrote and revised the manuscript and the supplementary information. J.W., M.J., Z.H., H.Z., Z.L., and  
414 Q.X. participated in discussions and provided valuable advice. All authors read and approved the  
415 manuscript.

## 416 **References**

- 417 1. Hoyo JD, Elliott A, Sargatal J, et al. Handbook of the birds of the world. Barcelona: Lynx Edicions; 1992.
- 418 2. Madsen J, Marcussen LK, Knudsen N, et al. Does intensive goose grazing affect breeding waders? *Ecol Evol*  
419 2019;**9**(24):14512-14522. doi:10.1002/ece3.5923.
- 420 3. Wang Y, Li SM, Huang J, et al. Mutations of TYR and MITF Genes are Associated with Plumage Colour  
421 Phenotypes in Geese. *Asian-Australas J Anim Sci* 2014;**27**(6):778-83. doi:10.5713/ajas.2013.13350.
- 422 4. Gao G, Zhao X, Li Q, et al. Genome and metagenome analyses reveal adaptive evolution of the host and  
423 interaction with the gut microbiota in the goose. *Sci Rep* 2016;**6**:32961. doi:10.1038/srep32961.
- 424 5. Yao Y, Yang YZ, Gu TT, et al. Comparison of the broody behavior characteristics of different breeds of geese.  
425 *Poult Sci* 2019;**98**(11):5226-5233. doi:10.3382/ps/pez366.
- 426 6. Lu L, Chen Y, Wang Z, et al. The goose genome sequence leads to insights into the evolution of waterfowl  
427 and susceptibility to fatty liver. *Genome Biol* 2015;**16**:89. doi:10.1186/s13059-015-0652-y.
- 428 7. Li HF, Zhu WQ, Chen KW, et al. Two maternal origins of Chinese domestic goose. *Poult Sci*  
429 2011;**90**(12):2705-10. doi:10.3382/ps.2011-01425.
- 430 8. Tang J, Shen X, Ouyang H, et al. Transcriptome analysis of pituitary gland revealed candidate genes and gene  
431 networks regulating the growth and development in goose. *Anim Biotechnol* 2020:1-11.  
432 doi:10.1080/10495398.2020.1801457.
- 433 9. Zhang X, Wang J, Li X, et al. Transcriptomic investigation of embryonic pectoral muscle reveals increased  
434 myogenic processes in Shitou geese compared to Wuzong geese. *Br Poult Sci* 2021;**62**(5):650-657.  
435 doi:10.1080/00071668.2021.1912292.
- 436 10. Ardui S, Ameer A, Vermeesch JR, et al. Single molecule real-time (SMRT) sequencing comes of age:  
437 applications and utilities for medical diagnostics. *Nucleic Acids Res* 2018;**46**(5):2159-2168.  
438 doi:10.1093/nar/gky066.
- 439 11. Yoshinaga Y, Daum C, He G, et al. Genome Sequencing. *Methods Mol Biol* 2018;**1775**:37-52.

- 440 doi:10.1007/978-1-4939-7804-5\_4.
- 441 12. Kong S, Zhang Y. Deciphering Hi-C: from 3D genome to function. *Cell Biol Toxicol* 2019;**35**(1):15-32.
- 442 doi:10.1007/s10565-018-09456-2.
- 443 13. Nakano K, Shiroma A, Shimoji M, et al. Advantages of genome sequencing by long-read sequencer using
- 444 SMRT technology in medical area. *Hum Cell* 2017;**30**(3):149-161. doi:10.1007/s13577-017-0168-8.
- 445 14. Jain M, Olsen HE, Turner DJ, et al. Linear assembly of a human centromere on the Y chromosome. *Nat*
- 446 *Biotechnol* 2018;**36**(4):321-323. doi:10.1038/nbt.4109.
- 447 15. Koren S, Walenz BP, Berlin K, et al. Canu: scalable and accurate long-read assembly via adaptive k-mer
- 448 weighting and repeat separation. *Genome Res* 2017;**27**(5):722-736. doi:10.1101/gr.215087.116.
- 449 16. Du H, Liang C. Assembly of chromosome-scale contigs by efficiently resolving repetitive sequences with long
- 450 reads. *Nat Commun* 2019;**10**(1):5360. doi:10.1038/s41467-019-13355-3.
- 451 17. Li H, Durbin R. Fast and accurate short read alignment with Burrows-Wheeler transform. *Bioinformatics*
- 452 2009;**25**(14):1754-60. doi:10.1093/bioinformatics/btp324.
- 453 18. Li H, Handsaker B, Wysoker A, et al. The Sequence Alignment/Map format and SAMtools. *Bioinformatics*
- 454 2009;**25**(16):2078-9. doi:10.1093/bioinformatics/btp352.
- 455 19. Walker BJ, Abeel T, Shea T, et al. Pilon: an integrated tool for comprehensive microbial variant detection and
- 456 genome assembly improvement. *Plos One* 2014;**9**(11):e112963. doi:10.1371/journal.pone.0112963.
- 457 20. Durand NC, Shamim MS, Machol I, et al. Juicer Provides a One-Click System for Analyzing Loop-Resolution
- 458 Hi-C Experiments. *Cell Syst* 2016;**3**(1):95-8. doi:10.1016/j.cels.2016.07.002.
- 459 21. Dudchenko O, Batra SS, Omer AD, et al. De novo assembly of the *Aedes aegypti* genome using Hi-C yields
- 460 chromosome-length scaffolds. *Science* 2017;**356**(6333):92-95. doi:10.1126/science.aal3327.
- 461 22. Servant N, Varoquaux N, Lajoie BR, et al. HiC-Pro: an optimized and flexible pipeline for Hi-C data processing.
- 462 *Genome Biol* 2015;**16**(1). doi:10.1186/s13059-015-0831-x.
- 463 23. Bolger AM, Lohse M, Usadel B. Trimmomatic: a flexible trimmer for Illumina sequence data. *Bioinformatics*
- 464 2014;**30**(15):2114-20. doi:10.1093/bioinformatics/btu170.
- 465 24. Grabherr MG, Haas BJ, Yassour M, et al. Full-length transcriptome assembly from RNA-Seq data without a
- 466 reference genome. *Nat Biotechnol* 2011;**29**(7):644-52. doi:10.1038/nbt.1883.
- 467 25. Huang Y, Niu B, Gao Y, et al. CD-HIT Suite: a web server for clustering and comparing biological sequences.
- 468 *Bioinformatics* 2010;**26**(5):680-2. doi:10.1093/bioinformatics/btq003.

- 469 26. Dobin A, Davis CA, Schlesinger F, et al. STAR: ultrafast universal RNA-seq aligner. *Bioinformatics*  
470 2013;**29**(1):15-21. doi:10.1093/bioinformatics/bts635.
- 471 27. Seppey M, Manni M, Zdobnov EM. BUSCO: Assessing Genome Assembly and Annotation Completeness.  
472 *Methods Mol Biol* 2019;**1962**:227-245. doi:10.1007/978-1-4939-9173-0\_14.
- 473 28. Lu L, Chen Y, Wang Z, et al. The goose genome sequence leads to insights into the evolution of waterfowl  
474 and susceptibility to fatty liver. *Genome Biol* 2015;**16**:89. doi:10.1186/s13059-015-0652-y.
- 475 29. Benson G. Tandem repeats finder: a program to analyze DNA sequences. *Nucleic Acids Res* 1999;**27**(2):573-  
476 80. doi:10.1093/nar/27.2.573.
- 477 30. Wang Y, Tang H, Debarry JD, et al. MCScanX: a toolkit for detection and evolutionary analysis of gene  
478 synteny and collinearity. *Nucleic Acids Res* 2012;**40**(7):e49. doi:10.1093/nar/gkr1293.
- 479 31. Stamatakis A. RAxML version 8: a tool for phylogenetic analysis and post-analysis of large phylogenies.  
480 *Bioinformatics* 2014;**30**(9):1312-3. doi:10.1093/bioinformatics/btu033.
- 481 32. Sanderson MJ. r8s: inferring absolute rates of molecular evolution and divergence times in the absence of a  
482 molecular clock. *Bioinformatics* 2003;**19**(2):301-2. doi:10.1093/bioinformatics/19.2.301.
- 483 33. Han MV, Thomas GW, Lugo-Martinez J, et al. Estimating gene gain and loss rates in the presence of error in  
484 genome assembly and annotation using CAFE 3. *Mol Biol Evol* 2013;**30**(8):1987-97.  
485 doi:10.1093/molbev/mst100.
- 486 34. Yu G, Wang LG, Han Y, et al. clusterProfiler: an R package for comparing biological themes among gene  
487 clusters. *Omic* 2012;**16**(5):284-7. doi:10.1089/omi.2011.0118.
- 488 35. Li Y, Gao G, Lin Y, et al. Pacific Biosciences assembly with Hi-C mapping generates an improved,  
489 chromosome-level goose genome. *Gigascience* 2020;**9**(10). doi:10.1093/gigascience/giaa114.
- 490 36. Gao G, Gao D, Zhao X, et al. Genome-Wide Association Study-Based Identification of SNPs and Haplotypes  
491 Associated With Goose Reproductive Performance and Egg Quality. *Front Genet* 2021;**12**:602583.  
492 doi:10.3389/fgene.2021.602583.
- 493 37. Nakano N, Maeyama K, Sakata N, et al. C18 ORF1, a novel negative regulator of transforming growth factor-  
494 beta signaling. *J Biol Chem* 2014;**289**(18):12680-92. doi:10.1074/jbc.M114.558981.
- 495 38. Cheret J, Bertolini M, Ponce L, et al. Olfactory receptor OR2AT4 regulates human hair growth. *Nat Commun*  
496 2018;**9**(1):3624. doi:10.1038/s41467-018-05973-0.
- 497 39. Balazova L, Balaz M, Horvath C, et al. GPR180 is a component of TGFbeta signalling that promotes

498 thermogenic adipocyte function and mediates the metabolic effects of the adipocyte-secreted factor CTHRC1.  
499 Nat Commun 2021;12(1):7144. doi:10.1038/s41467-021-27442-x.

500

## 501 **Figure legends**

502 **Figure 1. Sequencing process and presentation.** (A) The pipeline for generating chromosome scale  
503 scaffolds. Four sets of sequencing data (PacBio, BioNano optical mapping, Hi-C, and Illumina paired-  
504 end reads) were produced to generate the Lion-head goose reference genome. A tiered assembled  
505 technique using optical mapping data, followed by Hi-C assembly, was used to produce a high-quality  
506 assembled genome. (B) K-mer (17-mer) analysis for estimating the genome size of Lion-head goose.  
507 (C) Heatmap of Hi-C chromosomal interaction density. Hi-C interactions among 40 pseudo-  
508 chromosomes ordered by length. Dark red indicates strong interactions and yellow indicates weak  
509 interactions.

510 **Figure 2. Distribution of genomic features.** Concentric circle diagram presents the distribution of  
511 genomic features of Lion-head goose using nonoverlapping sliding windows with sizes of 1 Mb (from  
512 outmost to innermost). (A) the assembled pseudo-chromosome and the corresponding position; (B) gene  
513 density calculated on the basis of the number of genes; (C) average expression level of overall 36  
514 samples. eight tissues (i.e., brain, pharyngeal pouch, head sarcoma, spleen, liver, chest muscle, kidney  
515 and heart) and blood collected from four healthy adult animals; (D) GC content; (E) density of TE; (F)  
516 gene synteny and collinearity analysis.

517 **Figure 3. Phylogenetic relationship and comparative genomics analyses.** (A) Venn diagram showing  
518 the orthologous gene families shared among the genomes of Lion-head goose, Zhedong white goose,  
519 chicken, duck, and turkey. (B) Phylogenetic tree with the divergence times and history of orthologous  
520 gene families. Numbers on the nodes represent divergence times. The numbers of gene families that  
521 expanded (green) or contracted (red) in each lineage after speciation are shown on the circles of the  
522 corresponding branch. (C) Gene comparison of homologous chromosomes between Lion-head goose  
523 and duck. Gray lines indicate collinearity between the genomes.

524 **Figure 4. GO enrichment analysis of gene families.** (A) Expanded and (B) contracted gene families  
525 from Anatidae varieties (duck, Zhedong white goose, Lion-head goose). (C) Unique gene families from  
526 the Lion-head goose. The bar graph on the left represents the P-adjust gradient of GO terms, and the  
527 color corresponds to the number on the x-axis (i.e.  $-\log(P.\text{adj})$ ). The bluer the color is, the smaller the  
528 P-adjust is, and the more significant it is. The redder the color is, the larger the P-adjust is, and the less  
529 significant it is. The upper right bar chart exhibits that several genes act together on the terms below.  
530 The lower right chart displays the intersection of the genes of each term; the dots connected by lines  
531 represent the intersection of multiple terms; the black dots represent “yes”, and the gray dots represent  
532 “no”.

533 **Figure 5. Comparison of different goose species and genome-wide association analysis of body**  
534 **weight.** (A) Principal component analysis of sample structures using first two principal components. (B)  
535 The phylogenetic trees of several goose species. (C) Manhattan plot of genome-wide association  
536 analysis for body weight. The X-axis indicates chromosomes, and Y-axis indicates the P values of the  
537 SNP markers. The red solid line indicates the threshold P value for genome-wide significance. The blue  
538 solid line indicates the threshold P value for the significance of potential association.

539 **Figure 6. GO analysis of body weight-related genes:(A) Biological processes level, (B) Cellular**  
540 **component level.**



**Table 1:** Statistics of genome assembly quality.

| Method   | Type     | N50        | Number | Max length |
|----------|----------|------------|--------|------------|
| PacBio   | Contig   | 13,732,492 | 1,859  | 57,632,554 |
| BioNano  | Scaffold | 37,123,516 | 110    | 98,698,500 |
| Hi-C     | Contig   | 21,589,146 | 1,318  | 91,420,268 |
|          | Scaffold | 27,064,542 | 1,266  | 98,160,899 |
| Assembly | Contig   | 21,589,146 | 1,318  | 91,420,268 |
|          | Scaffold | 27,064,542 | 1,266  | 98,160,899 |

541

**Table 2:** Summary of BUSCOs genome evaluation.

| Item                                | Number | Percent (%) |
|-------------------------------------|--------|-------------|
| Complete BUSCOs (C)                 | 8081   | 96.9        |
| Complete and single-copy BUSCOs (S) | 7939   | 95.2        |
| Complete and duplicated BUSCOs (D)  | 142    | 1.7         |
| Fragmented BUSCOs (F)               | 93     | 1.1         |
| Missing BUSCOs (M)                  | 164    | 2.0         |
| Total BUSCO groups searched         | 8338   | 100         |

542

**Table 3:** Summary of repeat classification.

| Type                              | Length      | Percent |
|-----------------------------------|-------------|---------|
| Long interspersed nuclear element | 76,437,757  | 5.98    |
| Simple sequence repeats           | 23,026,311  | 1.80    |
| Low complexity                    | 4,663,288   | 0.36    |
| Tandem repeats                    | 52,426,380  | 4.10    |
| Total                             | 156,553,736 | 12.25   |

543

**Table 4:** Summary of gene families from several species.

| Animals             | Expansion | Contraction | Unique | Total  |
|---------------------|-----------|-------------|--------|--------|
| Lion-head goose     | 1,191     | 1,328       | 220    | 12,451 |
| Zhedong white goose | 53        | 1,465       | 2      | 12,106 |
| Chicken             | 228       | 663         | 94     | 13,049 |
| Duck                | 267       | 1,718       | 80     | 12,201 |
| Turkey              | 582       | 911         | 46     | 12,829 |
| Pigeon              | 171       | 694         | 21     | 12,454 |
| Saker               | 128       | 710         | 7      | 12,427 |
| Titmouse            | 83        | 1,215       | 15     | 12,407 |
| Lizard              | 368       | 1,736       | 282    | 13,034 |

544

**Table 5:** Genome-wide association analysis of body weight in geese.

| Chr | Allele | Physical position | Regression coefficient | P value  | Genes      |
|-----|--------|-------------------|------------------------|----------|------------|
| 2   | A      | 108496954         | -0.1886                | 1.01E-08 | LDLRAD4    |
| 2   | G      | 7706165           | 0.2612                 | 6.98E-06 | LDLRAD4    |
| 3   | T      | 123032780         | -0.3979                | 6.03E-07 | EGF, KBTBD |

|    |   |          |          |          |                |
|----|---|----------|----------|----------|----------------|
| 6  | A | 13264157 | -0.24    | 6.28E-07 | TSPAN          |
| 6  | T | 66027192 | 0.2127   | 8.14E-07 | IGFN1          |
| 7  | T | 39117443 | -0.3131  | 4.66E-06 | —              |
| 8  | T | 14712470 | 0.1865   | 8.97E-09 | PPEF1          |
| 9  | T | 26883582 | -2.7E+12 | 0        | OR             |
| 10 | C | 23997415 | -0.3032  | 1.19E-06 | —              |
| 10 | C | 23997399 | -0.2542  | 1.05E-05 | —              |
| 10 | T | 23997401 | -0.2542  | 1.05E-05 | —              |
| 11 | A | 22838749 | 0.1548   | 9.55E-06 | —              |
| 15 | T | 10257386 | 0.2527   | 2.96E-07 | GPR180, GPCPD1 |
| 16 | A | 1477673  | -0.1892  | 6.53E-06 | —              |
| 16 | G | 1477679  | -0.1891  | 6.78E-06 | —              |
| 20 | A | 8531879  | 0.151    | 3.05E-06 | —              |
| 22 | A | 1992485  | -0.3972  | 6.51E-09 | GALNT, AUTS2   |
| 22 | A | 1992518  | -0.3973  | 7.69E-09 | GALNT, AUTS2   |
| 22 | G | 1992501  | -0.3974  | 7.94E-09 | GALNT, AUTS2   |
| 22 | C | 1992505  | -0.3974  | 7.94E-09 | GALNT, AUTS2   |
| 22 | C | 1992507  | -0.3974  | 7.94E-09 | GALNT, AUTS2   |
| 22 | G | 1992515  | -0.3974  | 7.94E-09 | GALNT, AUTS2   |
| 28 | C | 3587271  | 0.2936   | 5.81E-08 | PPP1R15B, FGD2 |
| 28 | G | 4472051  | -0.2359  | 2.82E-06 | PPP1R15B, FGD2 |
| 30 | C | 1652158  | -0.3469  | 7.53E-07 | SH2            |
| 30 | T | 1258517  | 0.2205   | 1.48E-06 | SH2            |
| 30 | G | 2422665  | 0.1894   | 2.04E-06 | SH2            |
| 30 | T | 2422666  | 0.1894   | 2.04E-06 | SH2            |
| 30 | A | 1652207  | -0.3289  | 2.3E-06  | SH2            |
| 30 | T | 2269897  | 0.211    | 9.22E-06 | SH2            |
| 32 | G | 655318   | 0.2599   | 7.95E-06 | —              |
| 33 | A | 975487   | 0.2567   | 1.07E-08 | SDHA           |
| 36 | A | 1523127  | -0.3274  | 9.86E-07 | SPRY           |
| 36 | G | 1523132  | -0.3216  | 1.7E-06  | SPRY           |
| 36 | C | 1523105  | -0.3291  | 1.72E-06 | SPRY           |

---

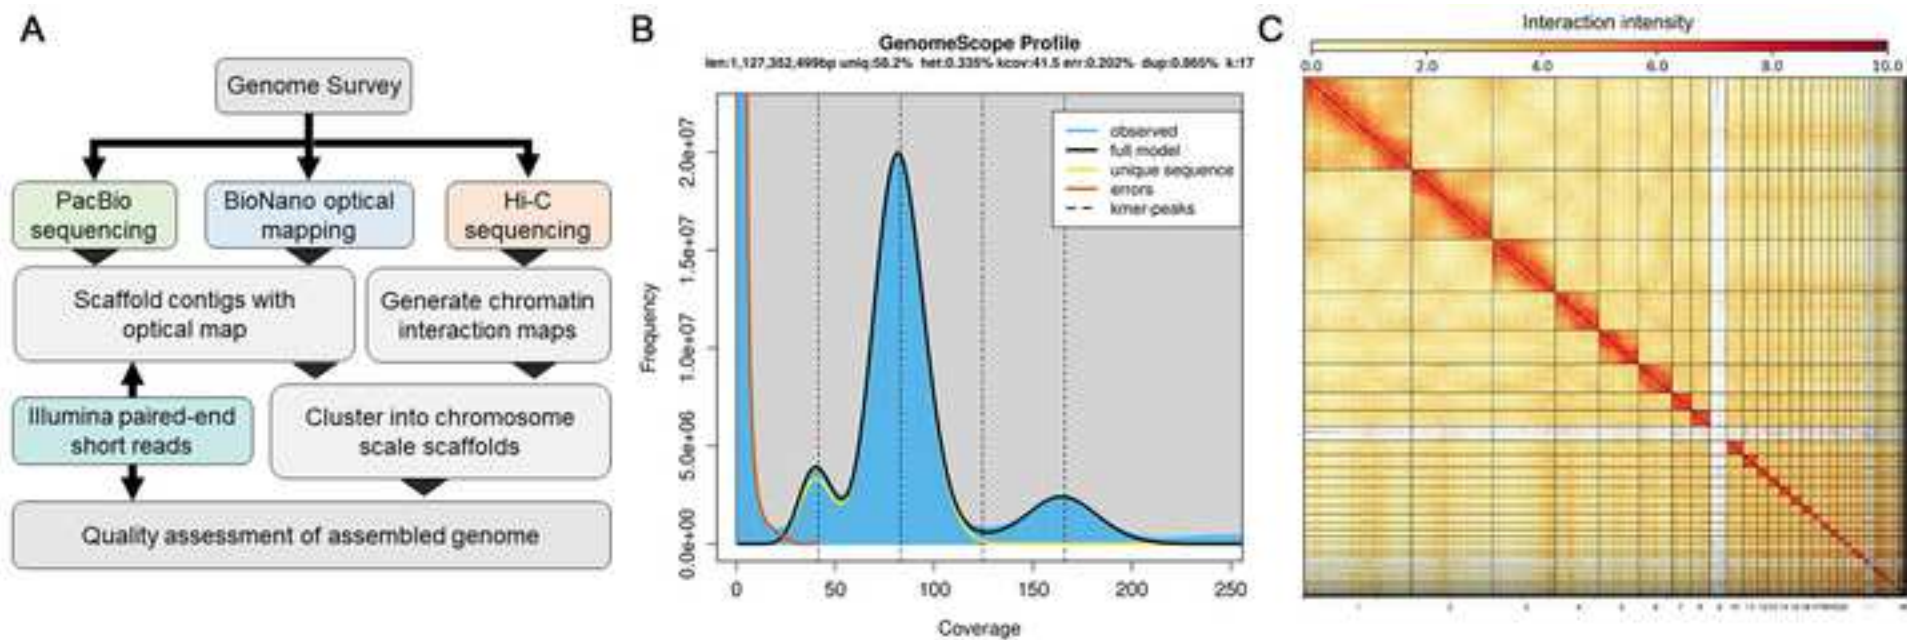

Figure 2

[Click here to access/download;Figure;2.tif](#)

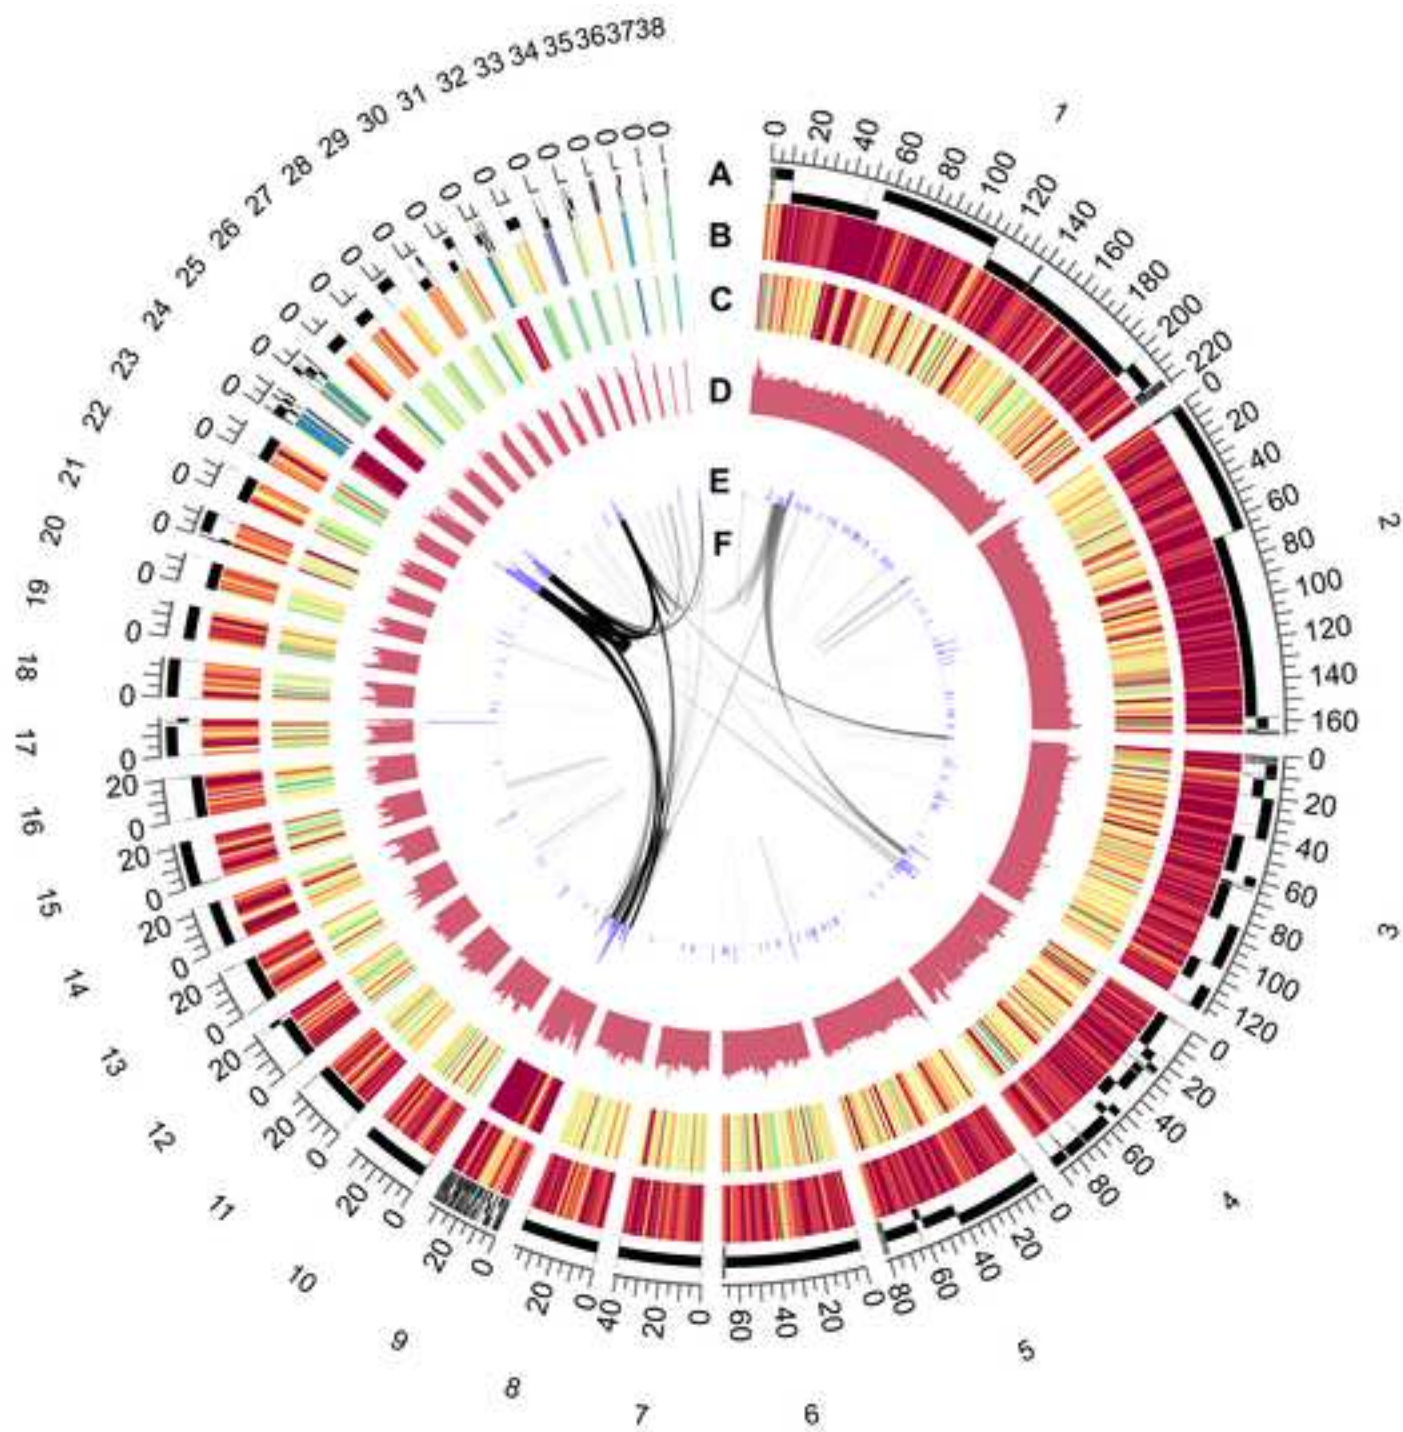

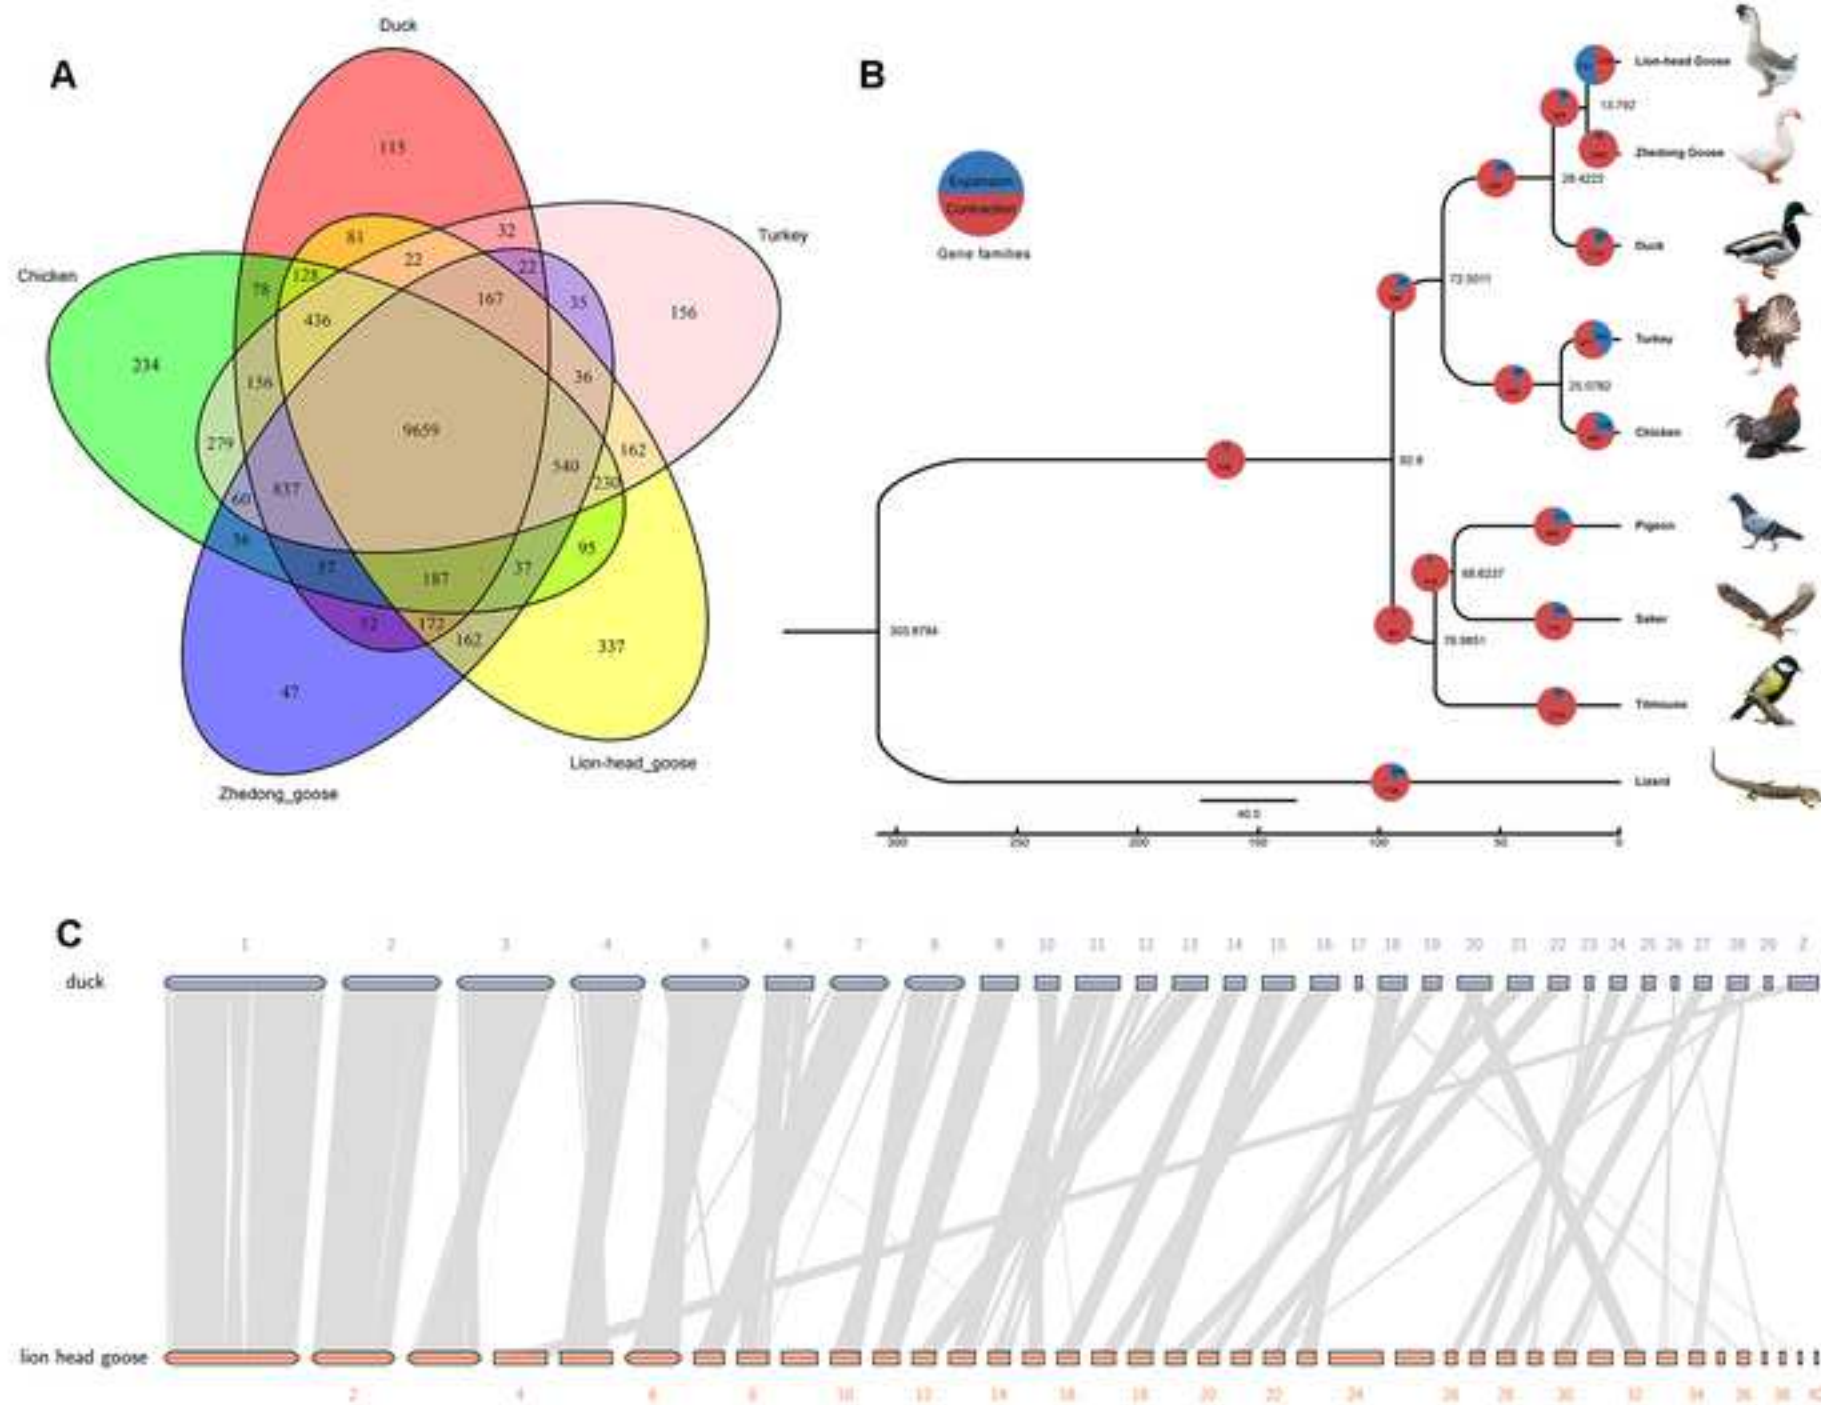

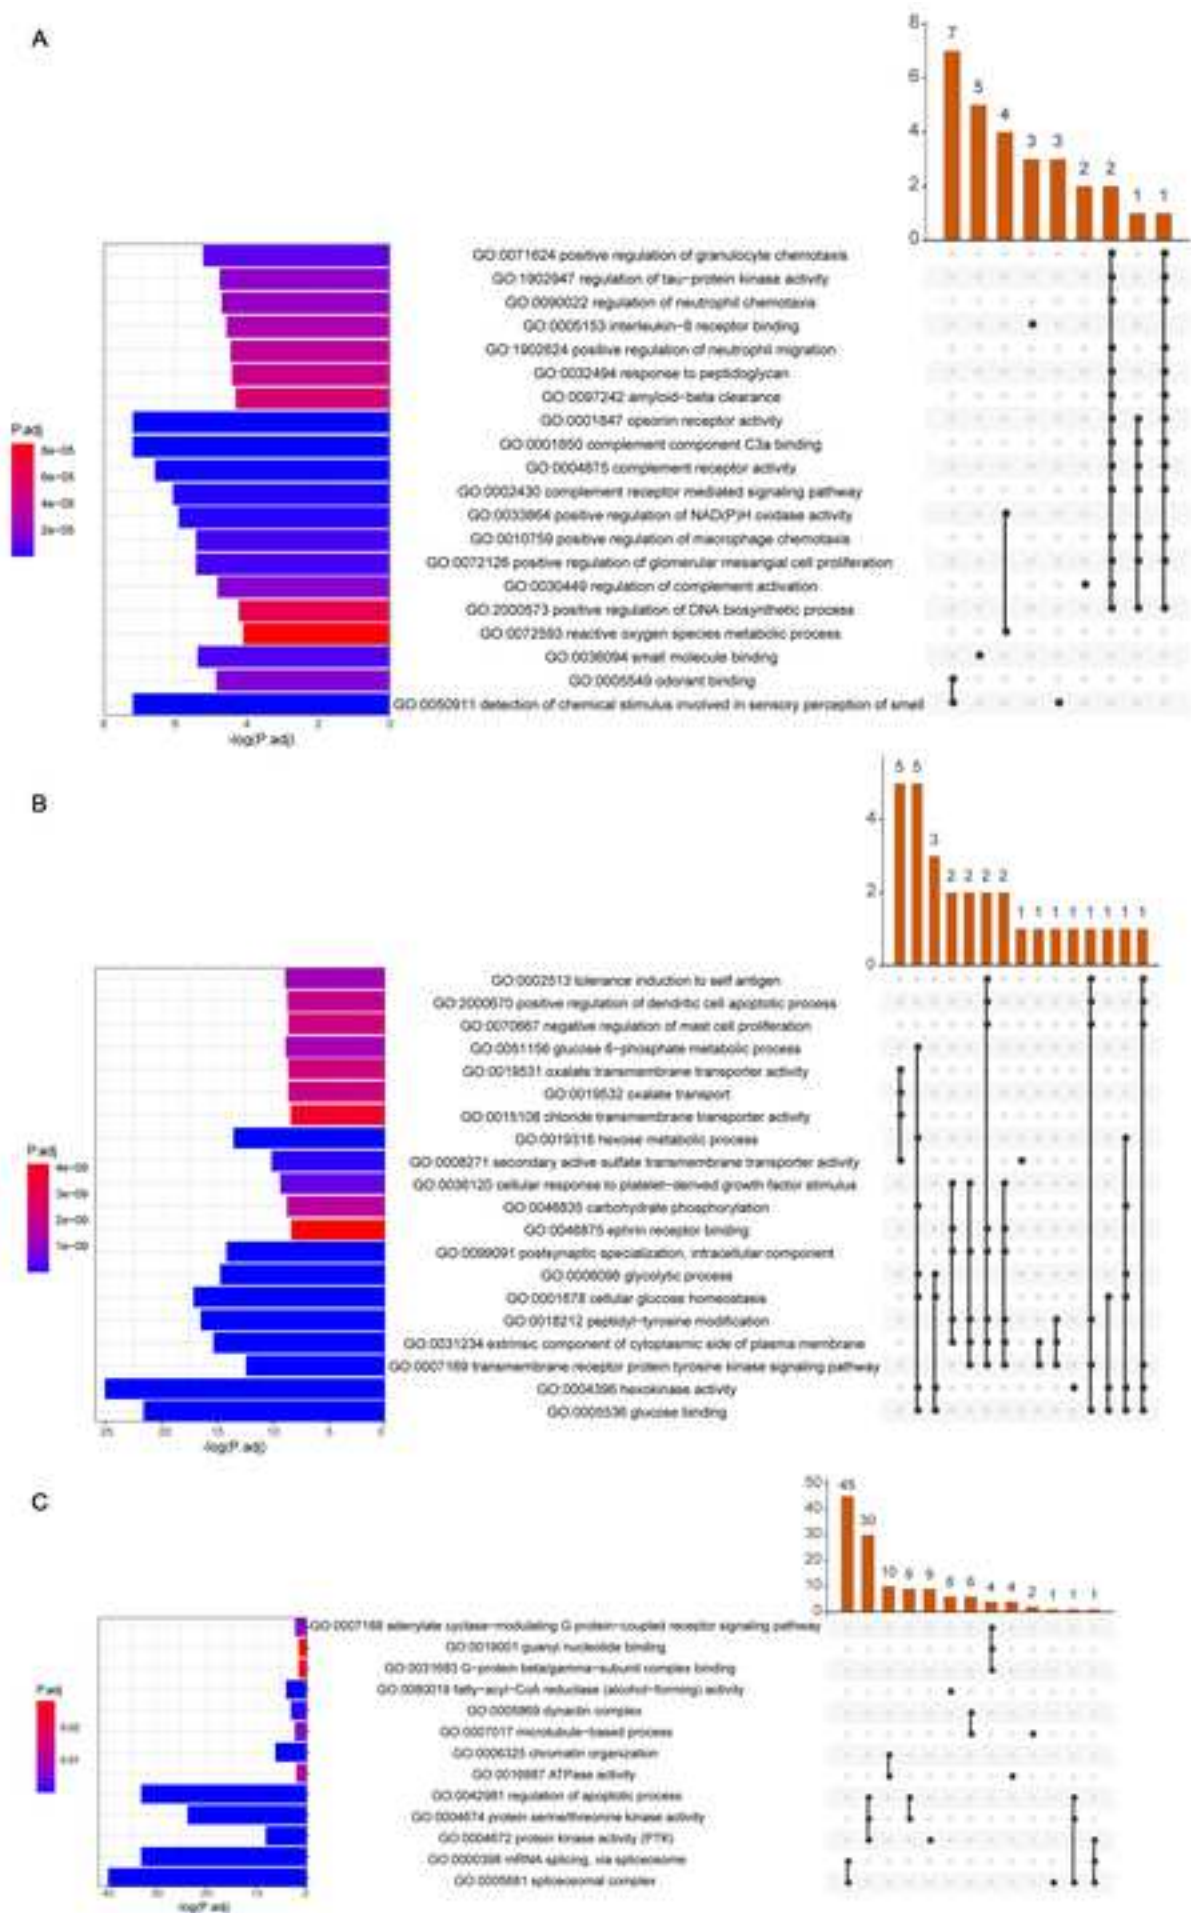

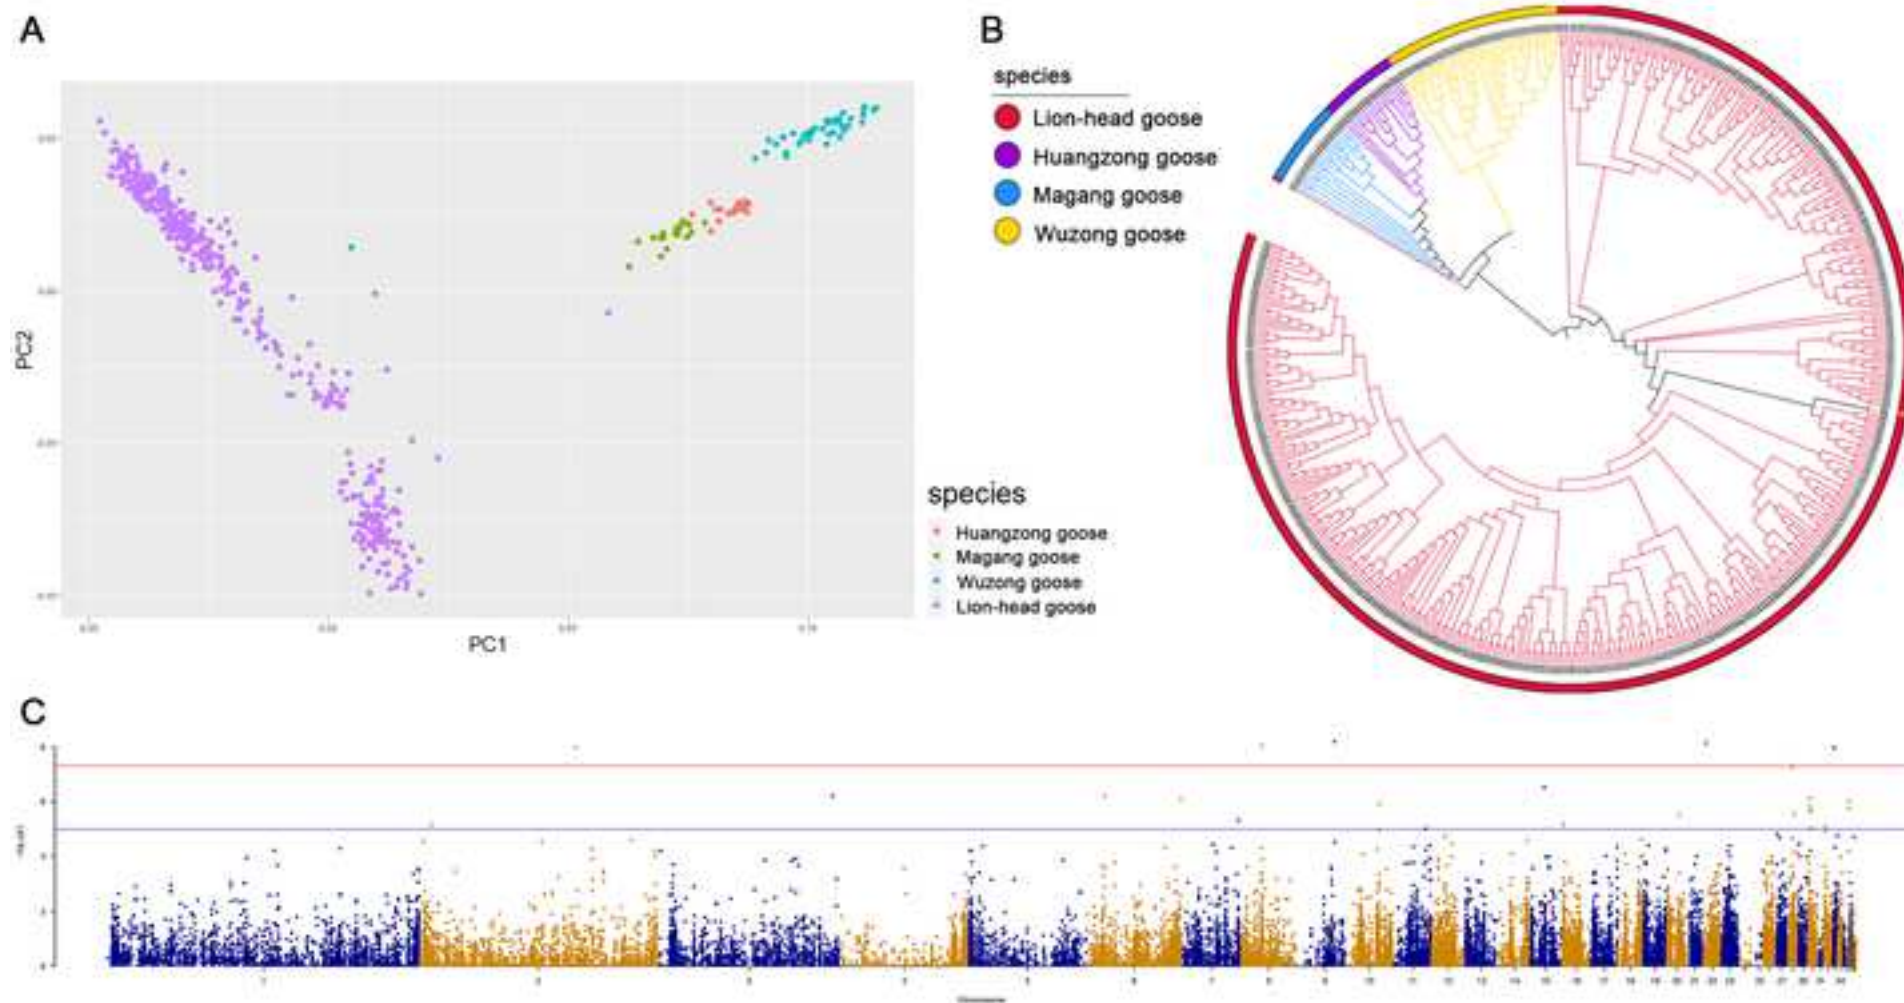

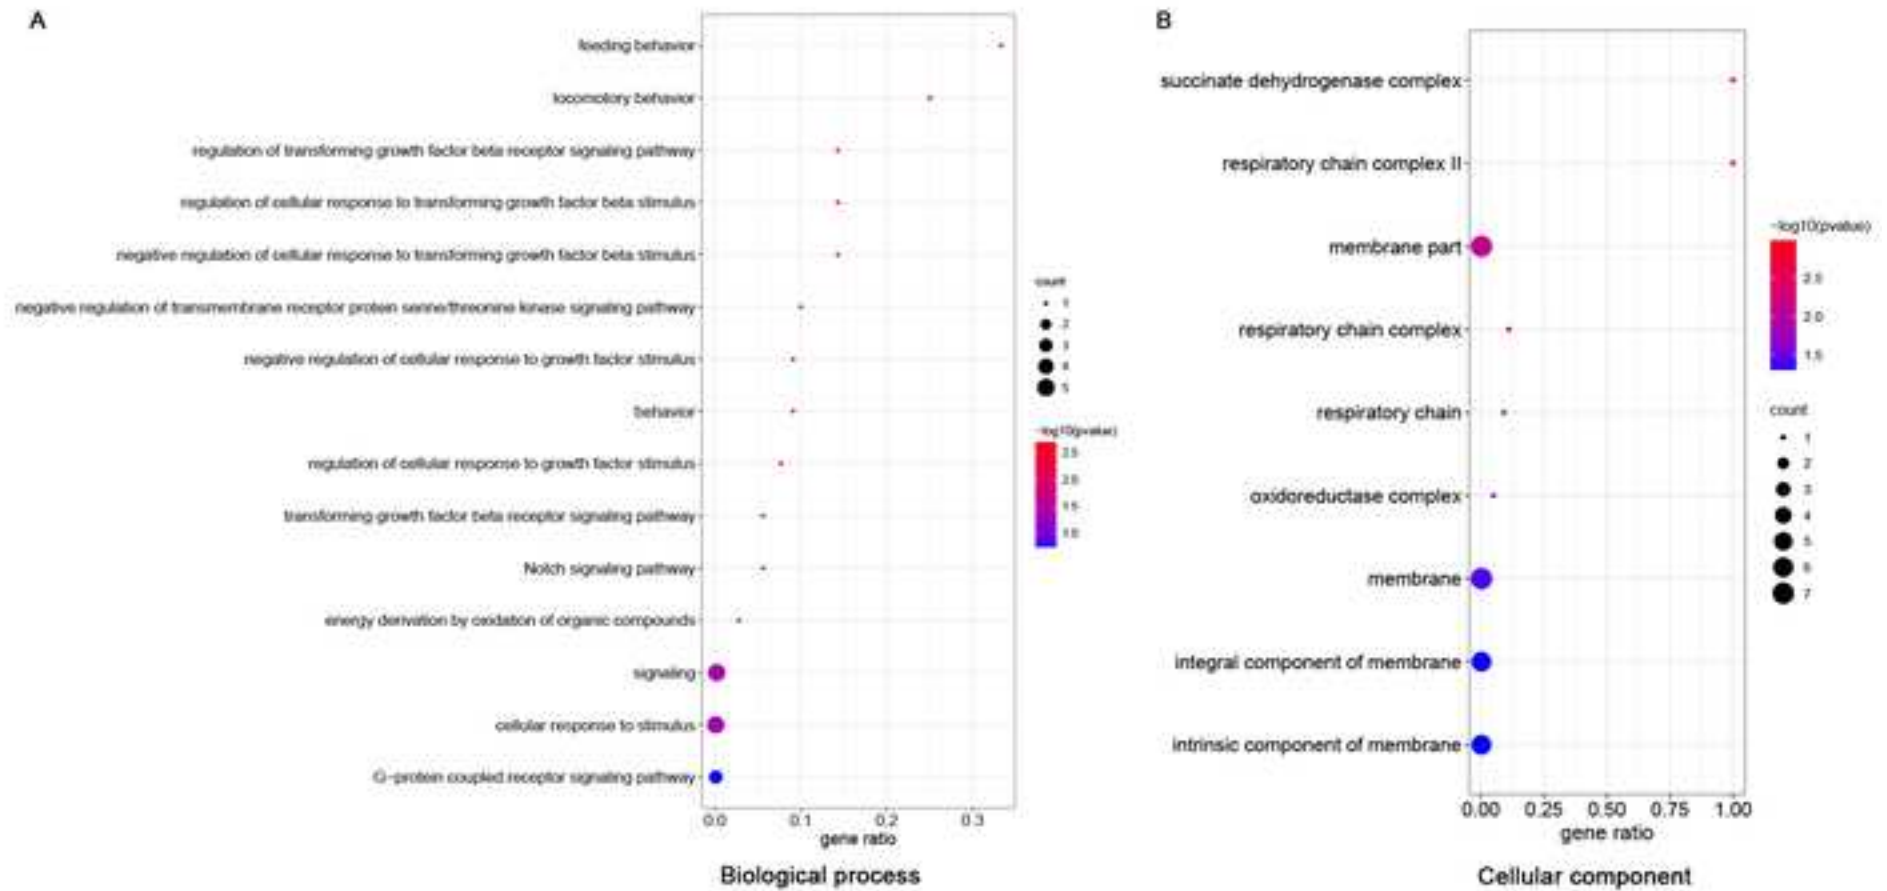



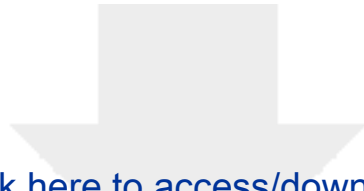

Click here to access/download  
**Supplementary Material**  
Supplemental\_Information.docx

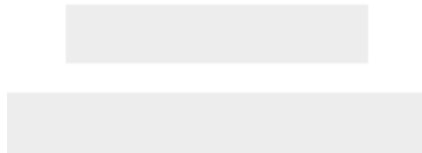

*GigaScience*

Dear Editor,

I hereby submit a research article entitled “Chromosome-level genome assembly of goose provides insight into the adaptation and growth of local goose breeds” for publication in multidisciplinary journal *GigaScience* on behalf of my co-authors. We have read and have abided by the statement of ethical standards for manuscripts submitted to *GigaScience*.

In this study, we assembled a high-quality chromosome-level 1.19 Gb genome of the lion-head goose. The genome assembly has contig and scaffold N50 of 20.59 Mb and 25.8 Mb, respectively. The comparative genomic results show that the genomes of lion-head goose and other goose species were similar in size and had a common origin. And in the population study, a genome-wide association study (GWAS) was performed on 514 geese including Wuzong goose, Huangzong goose, Magang goose and lion-head goose, yielding an average of 1520.6 Mb of raw data with 12.05× sequencing depth, identifying 44,858 SNPs. GWAS showed that six SNPs were significantly associated with body weight and 25 were potentially associated. Among the significantly associated SNP markers were annotated as *LDLRAD4*, *GPR189*, *OR*, etc., which enrich in the regulation of growth factor receptors signaling pathways. We imply that these results can play a significant role in promoting the goose industry and laying a foundation for future research.

We believe that these novel findings will approach a broad audience, including geneticists, breeders, and the general public. We are convinced that the results and impact of this work are consistent with the aims and style of *GigaScience*.

The authors declare that they have no conflict of interest. This manuscript describes original work and is not under consideration by any other journal. All authors approved the manuscript and this submission. All data has been uploaded to the NCBI BioProject database. Thank you for receiving our manuscript and considering it for review. We appreciate your time and look forward to your response.

With kind personal regards,

Professor Xinheng Zhang

College of Animal Science, South China Agricultural University

483 Wushan Road, Tianhe District, Guangzhou, 510642, China

E-mail: [xhzhang@scau.edu.cn](mailto:xhzhang@scau.edu.cn)
